# Supplementary material for: Giardia Duodenalis Colonization Slightly Affects Gut Microbiota And Haematological Parameters In Clinically Healthy Dogs
Source: Research Square preprint supplement (doi:10.21203/rs.3.rs-1334354/v1), 2022-02-11
Supplement: Supplementary file 1 [file 0f915752e6f0dd073c4b4026.xlsx]

## Sheet: haematological and biochemical 
Supplementary table 1: complete analysed dataset with metadata
ID	gender	age at sampling (months)	Giardia duodenalis (n.cystis)	WBC	NEUT#	LYMPH#	MONO#	EO#	BASO#	NEUT%	LYMPH%	MONO%	BASO%	EO%	RBC	HGB	HCT	MCV	MCH	MCHC	RDW-CV	PLT	MPV	VITAMINE B12	FOLATES	CRP	Proteins	Albumine	Globuline	urea	Creatinine	Glucose	cholesterol	TG	bilirubine	colinesterase	AST	ALT	ALP	GGT	amilase	lipase	CK	Fe	Ca	P	Mg	Na	K
				K/µl	K/µl	K/µl	K/µl	K/µl	K/µl	%	%	%	%	%	M/µl	g/dl	%	fl	pg	g/dl	%	K/µl	fl	pg/ml	ng/ml	mg/l	g/l	g/l	g/l	mmol/l	µmol/l	mmol/l	mmol/l	mmol/l	µmol/l	U/l	U/l	U/l	U/l	U/l	U/l	U/l	U/l	µg/dl	mmol/l	mmol/l	mmol/l	mmol/l	mmol/l
1	female	83.6333	0	7.78	4.82	1.68	0.64	0.63	0.01	62	21.6	8.2	0.1	8.1	6.87	15.7	46.3	67.4	22.9	33.9	12.6	234	12.3	311	10.17	2	67	39	28	8.9	98	2.8	11.01	2.06	<2,5	6280	17	36	24	<3	512	47	78	172	2.55	1.35	0.81	148	5.03
2	female	81.7333	0	8.36	9.83	1.8	0.49	0.42	0.02	67.7	18.8	9.5	0.1	3.9	6.95	15	51.7	66.4	21.9	33.3	16.5	175	10.2	334	7.87	2	68	35	26	6.8	92	3.2	6.24	0.69	<2,5	5193	40	41	12	<3	640	23	136	148	2.39	1.51	0.68	148	5.31
3	female	74.7	0	8.66	5.72	1.79	0.86	0.27	0.02	66.1	20.7	9.9	0.2	3.1	6.36	15.1	45.1	70.9	23.7	33.5	13.8	370	10.5	358.2	8.25	8	61	33	28	6.1	94	2.7	5.8	1.08	<2,5	5580	56	229	108	6	529	69	138	148	2.16	1.2	0.85	146	5.82
4	female	74.3667	0	8.77	5.7	1.95	0.49	0.59	0.04	65	22.2	5.6	0.5	6.7	8.24	19.5	57.7	70	23.7	33.8	16.5	208	12	335.5	13.44	5	68	40	28	6.7	84	0.4	5.93	0.72	<2,5	4903	38	41	16	<3	640	66	266	227	2.6	1.93	0.94	148	5.22
5	female	67	0	8.36	5.27	1.55	0.46	1.06	0.02	63.1	18.5	5.5	0.2	12.7	7.47	17.1	51.7	69.2	22.9	33.1	14.2	130	11.4	257.5	9.18	2	60	35	25	4.8	84	3.2	6.24	1.29	<2,5	7644	25	32	22	3	544	44	105	148	2.3	1.15	0.68	148	5.21
6	female	60.5	0	9.63	5.73	2.16	0.8	0.93	0.01	59.5	22.4	8.3	0.1	9.7	8.32	19.4	55	66.1	23.3	35.3	16.3	259	10.2	308.9	8.67	2	67	39	28	7.4	109	3	4.59	1.06	<2,5	4299	42	41	12	<3	717	32	194	127	2.37	0.84	0.78	148	5.27
7	female	47.1667	0	7.14	4.54	2.22	0.49	0.42	0.02	67.7	18.8	9.5	0.1	3.9	6.95	15	51.7	66.4	21.9	33.3	16.5	175	10.2	334	7.87	2	68	35	26	6.8	92	3.2	6.24	0.69	<2,5	2761	40	36	15	<3	640	23	136	148	2.39	1.93	0.85	148	5.21
8	female	31.6667	0	9.42	5.9	1.8	1.05	0.63	0.04	62.7	19.1	11.1	0.4	6.7	7.38	16.2	49	66.4	22	33.1	14.4	267	11.1	485.7	11.84	12	61	35	26	6.9	92	1.8	3.84	0.69	<2,5	5527	34	29	17	<3	520	23	148	103	2.35	1.4	0.77	149	5.14
9	female	24.4667	>50000	7.14	4.54	1.34	0.74	0.5	0.02	63.5	18.8	10.4	0.3	7	6.95	15.5	46.9	67.5	22.3	33	13.8	277	10	527.9	11.85	3	63	36	27	6.9	96	3.2	6.26	0.59	<2,5	4003	45	34	32	<3	405	89	136	138	2.25	0.98	0.79	148	5.49
10	female	18.2667	0	12.71	7.02	3.66	1.14	0.86	0.03	55.2	28.8	9	0.2	6.8	7.16	15.7	47.9	66.9	21.9	32.8	13.3	235	10.7	285.6	9.42	17	59	33	26	6.4	93	2.7	3.82	0.92	<2,5	4113	32	33	15	<3	625	34	116	144	2.39	1.74	0.76	148	5.31
11	female	15.2	0	13.66	9.83	2.22	0.91	0.58	0.12	71.9	16.3	6.7	0.9	4.2	6.52	14.9	45.9	70.4	22.9	32.5	14.3	242	11.4	405	9.76	3	63	39	24	6.8	94	3	6.49	0.6	<2,5	3787	28	36	27	3	308	41	138	253	2.59	1.8	0.81	147	5.14
12	male	85	0	8.16	5.12	1.8	0.65	0.56	0.03	62.6	22.1	8	0.4	6.9	7.07	16.3	50.5	71.4	23.1	32.3	16.1	274	12.5	334.8	11.87	4	66	40	26	6.3	86	3.2	5.93	0.66	<2,5	4108	36	55	22	3	699	30	129	137	2.2	1.37	0.78	146	4.85
13	male	84.5	0	10.74	5.96	2.22	1.29	1.24	0.03	55.5	20.7	12	0.3	11.5	7.71	18	52	67.4	23.3	34.6	15.5	171	11.4	473	7.81	2	70	39	31	5.8	97	3.1	3.9	0.45	<2,5	3694	36	36	27	5	712	30	203	121	2.27	0.91	0.85	148	4.96
14	male	81.7333	0	10.03	6.79	2.01	0.78	0.42	0.03	67.7	20	7.8	0.3	4.2	8.02	18.1	54.1	67.5	22.6	33.5	15.9	280	9.9	270.7	13.2	6	66	38	28	5.6	87	2.5	4.99	0.51	<2,5	4301	37	35	15	<3	744	21	197	103	2.36	1.27	0.9	148	5.3
15	male	19	0	10.11	6.84	1.87	0.82	0.56	0.02	67.7	18.5	8.1	0.2	5.5	6.38	14.6	44.6	69.9	22.9	32.7	12.2	199	12.6	367.5	7.87	4	60	39	21	5.5	92	2.2	5.59	0.4	<2,5	2761	27	39	32	<3	422	20	123	120	2.42	1.51	0.72	146	4.97
16	male	67.7	0	7.36	4.2	1.88	0.64	0.62	0.02	57.1	25.5	8.7	0.3	8.4	6.27	15	44.3	70.7	23.9	33.9	14.9	175	10.7	334	12.64	4	65	35	30	6.8	91	2.7	4.95	0.75	<2,5	4399	45	40	27	<3	516	29	223	147	2.23	1.67	0.81	146	5.08
17	male	21.5667	24500	10.44	6.82	1.93	0.97	0.67	0.05	65.3	18.5	9.3	0.5	6.4	6.39	14.3	42.9	67.1	22.4	33.3	12.9	194	12	607.2	14.44	4	63	38	25	10.2	107	2.4	7	0.46	<2,5	3324	57	69	33	<3	689	20	325	230	2.41	1.16	0.69	146	4.71
18	male	21.5667	0	10.03	4.53	2.6	0.49	0.42	0.02	67.7	18.8	9.5	0.1	3.9	6.95	15	51.7	66.4	23.1	33.3	16.5	175	10.2	334	8.67	2	68	35	26	6.8	92	3.2	6.24	0.69	<2,5	4299	34	36	12	<3	640	23	136	148	2.39	1.27	0.69	148	4.96
19	male	14.5	1000	10.14	6.17	2.63	1.09	0.22	0.03	60.9	25.9	10.7	0.3	2.2	7.54	16	48.5	64.3	21.2	33	13.9	221	10.3	287.9	13.48	11	63	34	29	7.4	109	4.2	3.94	0.65	<2,5	2801	40	40	32	<3	653	30	174	115	2.25	1.59	0.85	147	5.48
20	male	14.6667	0	5.42	2.68	1.53	0.41	0.77	0.03	49.4	28.2	7.6	0.6	14.2	6.17	14.1	44.4	72	22.9	31.8	13.9	98	10.8	364.8	15.45	3	55	34	21	5.6	81	2.9	5.66	0.42	<2,5	3770	27	44	46	<3	474	16	136	202	2.61	1.95	0.85	146	5.33
21	female	19	0	9.14	4.99	2.57	0.87	0.68	0.03	54.7	28.1	9.5	0.3	7.4	7.69	17.8	54.2	70.5	23.1	32.8	16.8	191	12	297.8	12.65	4	60	38	22	6.7	95	1.8	4.6	0.74	<2,5	3543	28	47	12	<3	490	40	139	120	2.27	2.14	0.84	148	5.31
22	female	19.1333	>50000	9.14	5.61	1.7	1.4	0.36	0.07	61.4	18.6	15.3	0.8	3.9	6.88	15.6	48	69.8	22.7	32.5	14.7	135	11.9	457.3	11.54	3	56	35	21	7.2	75	2.3	5.41	0.38	<2,5	4452	36	29	39	4	368	42	138	207	1.87	1.72	0.72	148	5.42
23	female	19.1333	3000	7.32	4.53	1.75	0.7	0.3	0.04	61.9	23.9	9.6	0.5	4.1	7.37	17.6	52.9	71.8	23.9	33.3	14.2	290	10.5	458.9	8.71	3	60	39	21	8.3	97	2.3	4.08	0.52	<2,5	4284	37	50	26	<3	514	56	150	123	1.86	1.48	0.79	150	5.62
24	female	19.1333	15750	10.6	7.37	1.78	0.82	0.55	0.08	69.5	16.8	7.7	0.8	5.2	6.59	15.4	46.9	71.2	23.4	32.8	13.6	275	10.9	278.9	11.62	4	54	32	22	5.8	64	2.2	4.88	0.47	<2,5	5193	31	88	41	4	465	29	139	305	2.06	1.72	0.73	148	5.7
25	male	16.9333	22500	12.9	7.54	2.6	1.92	0.76	0.08	58.4	20.2	14.9	0.6	5.9	6.43	15.3	45.7	71.1	23.8	33.5	13.1	204	11.2	361.7	15.87	15	58	33	25	5.9	103	1.9	3.53	0.3	<2,5	3833	44	39	38	<3	483	30	247	110	1.6	1.6	0.75	147	5.52
26	female	15.3333	>50000	10.03	5.96	2.54	1.02	0.43	0.08	59.4	25.3	10.2	0.8	4.3	6.79	15.2	46.8	68.9	22.4	32.5	16	211	11.1	356.8	8.04	2	53	32	21	6.7	67	2.7	4.78	0.54	<2,5	3323	35	35	50	4	445	74	158	264	2.02	2.05	0.78	147	5.41
27	female	15.3333	>50000	10.03	6.99	1.69	1.01	0.31	0.03	69.7	16.8	10.1	0.3	3.1	7.14	16.1	49	68.6	22.5	32.9	16.4	196	10.4	340	5.7	2	54	33	21	6.5	83	2.8	5.81	0.54	<2,5	4371	28	37	38	5	506	33	132	264	1.95	1.56	0.81	146	5.12
28	male	15.3333	>50000	17.21	13.03	2.24	1.37	0.53	0.04	75.7	13	8	0.2	3.1	7.21	15.6	48.6	67.4	21.6	32.1	16.6	109	11.1	198.5	6.77	6	56	32	24	6.3	74	1.9	3.58	0.42	<2,5	3059	38	42	28	3	712	41	163	178	2.09	1.94	0.77	147	5.38
29	female	15.1667	1250	6.85	3.97	1.63	0.73	0.47	0.05	57.9	23.8	10.7	0.7	6.9	7.06	16.6	49.9	70.7	23.5	33.3	15.4	149	11.2	419.1	7.41	2	58	37	21	4.7	71	2	3.5	0.36	<2,5	3573	30	35	27	<3	374	34	152	196	1.94	1.56	0.82	149	5.1
30	female	15.1667	>50000	10.65	6.11	2.21	1.28	1	0.05	57.3	20.8	12	0.5	9.4	6.82	16	49	71.8	23.5	32.7	14.6	111	11.5	350.6	8.93	6	60	36	24	5.8	71	2.3	5.43	0.49	<2,5	5754	30	35	34	<3	687	39	119	244	2.15	1.85	0.81	149	5.49
31	male	15.1667	11750	9.81	5.16	2.29	1.52	0.8	0.04	52.6	23.3	15.5	0.4	8.2	6.22	14.2	43.5	69.9	22.8	32.6	13.9	132	12.3	319.5	6.43	4	54	35	19	7.5	83	2.9	4.28	0.5	<2,5	4257	46	102	42	3	454	11	168	207	2.02	1.75	0.73	149	5.01
[truncated: 3 more columns]
