# Supplementary material for: Giardia Duodenalis Colonization Slightly Affects Gut Microbiota And Haematological Parameters In Clinically Healthy Dogs
Source: Research Square preprint supplement (doi:10.21203/rs.3.rs-1334354/v1), 2022-02-11
Supplement: Supplementary file 2 [file 555edc8662c92adb8da3ae37.docx]

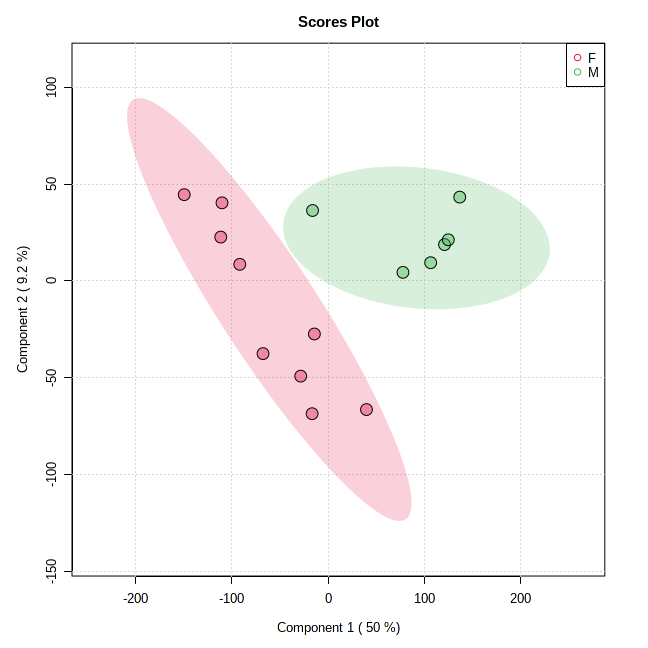

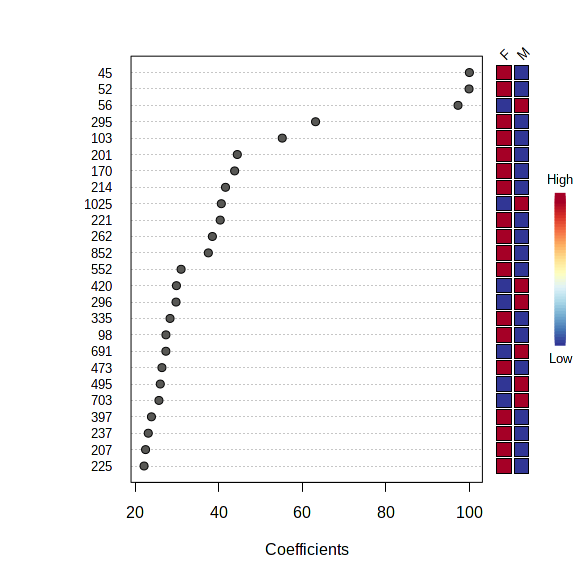

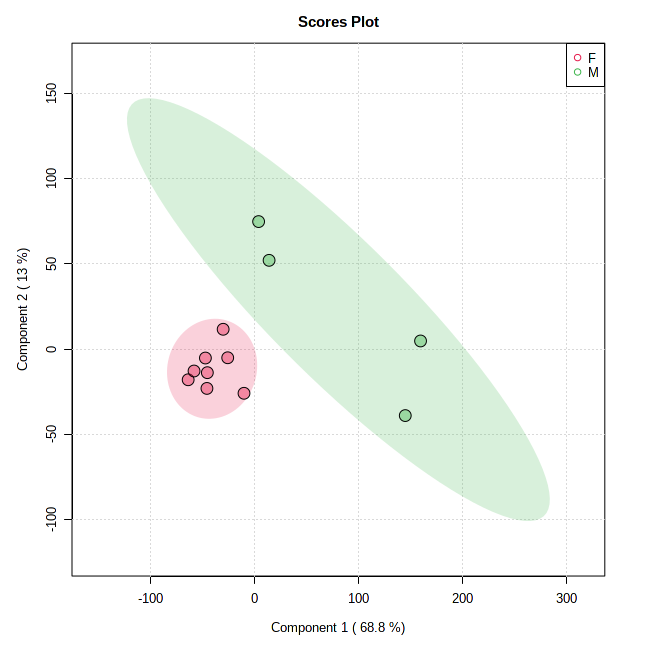

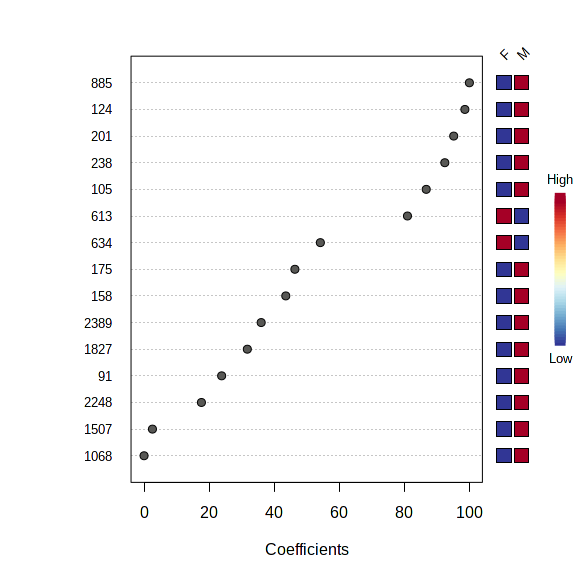


**(a)**

**(b)**

Figure 2S: Partial least squares discriminant analysis (PLS-DA) results showing the comparison between OTU data acquired for (a) GNM vs GNF, (b) GPM vs. GPF. On the left, the 2-D PLS-DA scores plots; on the right, the variable importance in projection plots. The most discriminating OTUs are shown in descending order of their coefficient scores. The colour boxes indicate whether OTU is increased (red) or decreased (blue) in Female (F) vs. male (M).
