# Supplementary material for: Giardia Duodenalis Colonization Slightly Affects Gut Microbiota And Haematological Parameters In Clinically Healthy Dogs
Source: Research Square preprint supplement (doi:10.21203/rs.3.rs-1334354/v1), 2022-02-11
Supplement: Supplementary file 6 [file 16aab4d3057760d2f08c2ecb.csv]

Supplmentary table 3: OTUs Table
dog ID	12	13	14	20	21	22	2	24	27	28	1	3	4	5	10	11	15	16	18	23	25	26	29	30	31	6	9	7	17	8	19
OTU 1	1076.0	1281.0	267.0	149.0	6.0	139.0	125.0	152.0	42.0	0.0	0.0	23.0	40.0	27.0	20.0	329.0	14.0	26.0	112.0	57.0	0.0	31.0	0.0	425.0	0.0	100.0	747.0	94.0	33.0	31.0	1060.0
OTU 2	813.0	980.0	212.0	140.0	16.0	161.0	0.0	155.0	50.0	40.0	0.0	28.0	38.0	29.0	13.0	342.0	19.0	16.0	98.0	55.0	0.0	23.0	0.0	353.0	0.0	78.0	562.0	58.0	0.0	51.0	873.0
OTU 3	529.0	206.0	0.0	15.0	95.0	21.0	36.0	34.0	0.0	0.0	16.0	0.0	0.0	0.0	16.0	0.0	0.0	8.0	1829.0	0.0	0.0	0.0	0.0	0.0	0.0	0.0	88.0	56.0	2138.0	34.0	0.0
OTU 4	817.0	1054.0	173.0	124.0	12.0	127.0	0.0	145.0	45.0	11.0	0.0	28.0	29.0	14.0	15.0	285.0	16.0	10.0	89.0	47.0	0.0	13.0	0.0	326.0	0.0	74.0	635.0	49.0	0.0	23.0	922.0
OTU 5	472.0	629.0	238.0	180.0	17.0	262.0	0.0	184.0	48.0	0.0	0.0	35.0	46.0	29.0	22.0	578.0	34.0	39.0	115.0	71.0	0.0	31.0	0.0	419.0	0.0	34.0	496.0	55.0	23.0	45.0	649.0
OTU 6	110.0	201.0	31.0	174.0	238.0	295.0	98.0	112.0	320.0	64.0	110.0	162.0	483.0	116.0	36.0	271.0	250.0	234.0	65.0	73.0	117.0	191.0	307.0	105.0	92.0	58.0	55.0	59.0	46.0	135.0	20.0
OTU 7	490.0	661.0	196.0	186.0	21.0	213.0	0.0	186.0	46.0	0.0	0.0	28.0	38.0	14.0	23.0	533.0	30.0	27.0	83.0	75.0	75.0	21.0	0.0	336.0	0.0	49.0	492.0	56.0	17.0	40.0	685.0
OTU 8	0.0	0.0	43.0	52.0	0.0	39.0	643.0	245.0	42.0	43.0	381.0	28.0	0.0	13.0	117.0	25.0	0.0	0.0	16.0	360.0	211.0	291.0	4.0	130.0	0.0	935.0	70.0	690.0	0.0	158.0	48.0
OTU 9	151.0	153.0	21.0	212.0	69.0	133.0	126.0	67.0	110.0	161.0	145.0	132.0	718.0	148.0	27.0	257.0	239.0	251.0	48.0	81.0	171.0	190.0	220.0	27.0	183.0	111.0	143.0	89.0	53.0	91.0	0.0
OTU 10	332.0	508.0	209.0	178.0	12.0	260.0	0.0	209.0	55.0	59.0	0.0	42.0	66.0	32.0	28.0	676.0	45.0	47.0	102.0	87.0	0.0	27.0	0.0	381.0	0.0	34.0	428.0	47.0	0.0	46.0	526.0
OTU 11	166.0	225.0	35.0	183.0	59.0	112.0	130.0	74.0	99.0	136.0	127.0	106.0	596.0	120.0	26.0	208.0	211.0	220.0	54.0	71.0	160.0	186.0	256.0	76.0	218.0	130.0	145.0	105.0	92.0	88.0	0.0
OTU 12	158.0	296.0	39.0	147.0	208.0	244.0	129.0	100.0	301.0	61.0	98.0	125.0	382.0	74.0	36.0	215.0	219.0	167.0	57.0	75.0	109.0	143.0	308.0	136.0	116.0	71.0	50.0	65.0	52.0	148.0	32.0
OTU 13	423.0	177.0	0.0	5.0	95.0	27.0	33.0	0.0	0.0	0.0	17.0	0.0	0.0	0.0	17.0	0.0	0.0	1.0	1588.0	81.0	0.0	0.0	0.0	0.0	45.0	42.0	85.0	0.0	1661.0	35.0	0.0
OTU 14	0.0	0.0	43.0	54.0	0.0	74.0	477.0	307.0	71.0	42.0	365.0	38.0	0.0	18.0	159.0	46.0	0.0	0.0	26.0	490.0	267.0	399.0	31.0	165.0	0.0	501.0	31.0	405.0	0.0	241.0	28.0
OTU 15	434.0	179.0	0.0	9.0	85.0	14.0	22.0	28.0	0.0	0.0	19.0	0.0	0.0	0.0	10.0	0.0	0.0	10.0	1440.0	0.0	0.0	0.0	0.0	0.0	0.0	0.0	75.0	0.0	1828.0	19.0	21.0
OTU 16	0.0	0.0	0.0	57.0	0.0	46.0	396.0	329.0	72.0	37.0	394.0	76.0	0.0	24.0	190.0	49.0	0.0	0.0	23.0	553.0	288.0	383.0	40.0	156.0	43.0	371.0	27.0	339.0	0.0	265.0	19.0
OTU 17	353.0	575.0	38.0	123.0	292.0	167.0	127.0	109.0	209.0	44.0	62.0	85.0	285.0	50.0	26.0	139.0	104.0	92.0	63.0	50.0	96.0	131.0	203.0	105.0	107.0	127.0	92.0	73.0	89.0	73.0	27.0
OTU 18	455.0	346.0	27.0	107.0	76.0	67.0	201.0	46.0	76.0	83.0	119.0	57.0	377.0	78.0	18.0	147.0	115.0	95.0	57.0	41.0	127.0	146.0	141.0	45.0	178.0	254.0	226.0	183.0	119.0	55.0	22.0
OTU 19	0.0	0.0	0.0	58.0	0.0	41.0	502.0	293.0	58.0	28.0	352.0	24.0	0.0	13.0	103.0	33.0	0.0	0.0	21.0	367.0	215.0	277.0	23.0	135.0	34.0	663.0	54.0	512.0	0.0	163.0	28.0
OTU 20	151.0	344.0	25.0	177.0	214.0	194.0	104.0	117.0	237.0	53.0	77.0	102.0	394.0	66.0	24.0	225.0	159.0	163.0	57.0	63.0	109.0	129.0	231.0	104.0	85.0	70.0	55.0	56.0	62.0	95.0	32.0
OTU 21	254.0	440.0	32.0	113.0	288.0	178.0	114.0	108.0	223.0	60.0	81.0	70.0	300.0	52.0	28.0	135.0	127.0	95.0	66.0	47.0	82.0	136.0	189.0	133.0	116.0	82.0	88.0	59.0	73.0	84.0	18.0
OTU 22	82.0	148.0	31.0	142.0	199.0	259.0	78.0	112.0	271.0	44.0	85.0	128.0	422.0	82.0	33.0	238.0	224.0	193.0	50.0	54.0	118.0	153.0	252.0	117.0	89.0	41.0	39.0	40.0	33.0	84.0	16.0
OTU 23	0.0	0.0	30.0	60.0	0.0	45.0	424.0	291.0	56.0	58.0	358.0	33.0	0.0	22.0	165.0	36.0	0.0	0.0	21.0	436.0	241.0	346.0	14.0	134.0	0.0	460.0	29.0	375.0	0.0	192.0	20.0
OTU 24	0.0	0.0	0.0	46.0	0.0	61.0	401.0	266.0	76.0	46.0	332.0	49.0	0.0	19.0	142.0	39.0	0.0	0.0	29.0	413.0	243.0	295.0	11.0	117.0	26.0	457.0	32.0	369.0	0.0	206.0	22.0
OTU 25	0.0	0.0	0.0	59.0	0.0	42.0	367.0	302.0	54.0	41.0	310.0	39.0	0.0	29.0	155.0	47.0	0.0	0.0	19.0	426.0	244.0	275.0	14.0	140.0	26.0	424.0	24.0	350.0	0.0	227.0	19.0
OTU 26	232.0	243.0	7.0	101.0	353.0	53.0	179.0	89.0	98.0	52.0	76.0	79.0	133.0	75.0	30.0	59.0	28.0	19.0	20.0	108.0	75.0	121.0	92.0	79.0	119.0	477.0	132.0	306.0	53.0	59.0	51.0
OTU 27	64.0	97.0	12.0	165.0	243.0	105.0	121.0	127.0	137.0	76.0	108.0	137.0	215.0	138.0	55.0	139.0	69.0	64.0	27.0	128.0	122.0	138.0	176.0	104.0	119.0	234.0	46.0	194.0	20.0	108.0	18.0
OTU 28	99.0	28.0	21.0	205.0	267.0	95.0	78.0	31.0	243.0	94.0	83.0	114.0	220.0	100.0	16.0	177.0	129.0	118.0	54.0	38.0	167.0	118.0	223.0	188.0	200.0	114.0	30.0	90.0	24.0	28.0	43.0
OTU 29	138.0	44.0	44.0	152.0	296.0	47.0	99.0	33.0	239.0	73.0	68.0	93.0	204.0	116.0	21.0	152.0	116.0	83.0	63.0	33.0	146.0	112.0	189.0	205.0	185.0	172.0	45.0	116.0	49.0	29.0	0.0
OTU 30	0.0	0.0	0.0	55.0	0.0	40.0	316.0	286.0	63.0	53.0	293.0	43.0	0.0	17.0	137.0	40.0	0.0	0.0	13.0	483.0	279.0	314.0	0.0	125.0	0.0	282.0	29.0	240.0	0.0	207.0	13.0
OTU 31	226.0	103.0	0.0	8.0	75.0	24.0	19.0	10.0	0.0	0.0	23.0	0.0	0.0	0.0	19.0	0.0	5.0	7.0	1335.0	0.0	0.0	0.0	0.0	0.0	0.0	0.0	65.0	0.0	1277.0	35.0	0.0
OTU 32	298.0	85.0	36.0	121.0	341.0	40.0	136.0	14.0	167.0	49.0	57.0	64.0	107.0	55.0	6.0	75.0	61.0	55.0	68.0	14.0	101.0	85.0	146.0	184.0	181.0	258.0	78.0	185.0	74.0	16.0	0.0
OTU 33	201.0	79.0	0.0	19.0	81.0	33.0	17.0	0.0	0.0	11.0	25.0	0.0	0.0	0.0	24.0	0.0	13.0	8.0	1569.0	0.0	0.0	0.0	0.0	0.0	0.0	0.0	64.0	0.0	871.0	57.0	0.0
OTU 34	227.0	271.0	120.0	163.0	15.0	243.0	0.0	154.0	42.0	0.0	0.0	20.0	45.0	31.0	17.0	542.0	24.0	36.0	49.0	60.0	0.0	33.0	0.0	258.0	0.0	22.0	253.0	30.0	0.0	36.0	300.0
OTU 35	73.0	82.0	22.0	131.0	214.0	95.0	92.0	100.0	141.0	87.0	93.0	137.0	158.0	89.0	60.0	103.0	65.0	66.0	19.0	107.0	83.0	152.0	130.0	81.0	100.0	176.0	63.0	132.0	17.0	89.0	17.0
OTU 36	0.0	0.0	817.0	0.0	0.0	0.0	0.0	0.0	0.0	0.0	0.0	0.0	0.0	0.0	2.0	0.0	0.0	0.0	0.0	0.0	0.0	0.0	0.0	0.0	0.0	0.0	1769.0	0.0	0.0	0.0	10.0
OTU 37	138.0	152.0	33.0	140.0	39.0	102.0	79.0	0.0	140.0	28.0	85.0	81.0	227.0	219.0	13.0	91.0	0.0	56.0	14.0	17.0	47.0	30.0	187.0	94.0	200.0	95.0	43.0	55.0	32.0	72.0	31.0
OTU 38	314.0	417.0	23.0	92.0	39.0	50.0	139.0	14.0	77.0	13.0	63.0	45.0	114.0	90.0	8.0	36.0	0.0	0.0	28.0	6.0	28.0	14.0	111.0	85.0	159.0	196.0	69.0	121.0	89.0	45.0	38.0
OTU 39	0.0	0.0	102.0	66.0	17.0	20.0	215.0	270.0	51.0	11.0	160.0	50.0	0.0	37.0	42.0	19.0	0.0	0.0	16.0	88.0	95.0	147.0	91.0	24.0	9.0	270.0	94.0	218.0	0.0	71.0	176.0
OTU 40	128.0	85.0	0.0	40.0	60.0	32.0	14.0	33.0	0.0	0.0	14.0	0.0	0.0	0.0	35.0	0.0	16.0	7.0	1094.0	0.0	0.0	0.0	0.0	0.0	0.0	0.0	41.0	0.0	693.0	51.0	0.0
OTU 41	0.0	0.0	0.0	84.0	16.0	24.0	187.0	319.0	67.0	7.0	138.0	100.0	0.0	33.0	54.0	34.0	0.0	0.0	21.0	146.0	161.0	209.0	95.0	49.0	9.0	150.0	62.0	138.0	0.0	108.0	103.0
OTU 42	124.0	283.0	32.0	72.0	76.0	81.0	72.0	40.0	113.0	26.0	44.0	59.0	81.0	41.0	17.0	47.0	12.0	16.0	33.0	48.0	63.0	38.0	100.0	95.0	96.0	139.0	55.0	117.0	87.0	41.0	136.0
OTU 43	58.0	141.0	32.0	99.0	90.0	128.0	49.0	56.0	160.0	46.0	47.0	102.0	150.0	70.0	30.0	92.0	24.0	29.0	23.0	64.0	81.0	69.0	134.0	85.0	121.0	91.0	26.0	64.0	39.0	79.0	0.0
OTU 44	53.0	117.0	30.0	101.0	69.0	163.0	43.0	44.0	194.0	30.0	63.0	116.0	161.0	83.0	24.0	114.0	34.0	28.0	18.0	65.0	62.0	57.0	170.0	80.0	90.0	63.0	20.0	51.0	24.0	79.0	0.0
OTU 45	0.0	0.0	0.0	87.0	14.0	19.0	148.0	328.0	76.0	15.0	159.0	98.0	0.0	45.0	53.0	52.0	0.0	0.0	26.0	138.0	138.0	201.0	112.0	48.0	17.0	102.0	36.0	115.0	0.0	131.0	81.0
OTU 46	0.0	0.0	0.0	28.0	0.0	33.0	214.0	162.0	29.0	23.0	213.0	21.0	0.0	10.0	73.0	20.0	0.0	0.0	13.0	224.0	146.0	170.0	2.0	75.0	0.0	344.0	23.0	268.0	0.0	120.0	17.0
OTU 47	62.0	64.0	0.0	23.0	80.0	168.0	35.0	56.0	128.0	44.0	45.0	54.0	121.0	64.0	60.0	24.0	355.0	316.0	64.0	20.0	33.0	45.0	23.0	49.0	55.0	66.0	19.0	59.0	26.0	27.0	12.0
OTU 48	64.0	64.0	44.0	23.0	73.0	184.0	53.0	71.0	144.0	44.0	37.0	64.0	97.0	46.0	48.0	19.0	303.0	257.0	82.0	19.0	21.0	33.0	22.0	47.0	48.0	87.0	28.0	89.0	28.0	26.0	29.0
OTU 49	22.0	0.0	56.0	108.0	100.0	63.0	42.0	26.0	104.0	47.0	46.0	51.0	21.0	48.0	14.0	80.0	0.0	0.0	33.0	27.0	97.0	32.0	107.0	177.0	339.0	223.0	51.0	164.0	21.0	45.0	20.0
OTU 50	0.0	0.0	706.0	0.0	30.0	0.0	0.0	0.0	0.0	0.0	0.0	0.0	0.0	0.0	0.0	0.0	0.0	0.0	0.0	0.0	0.0	0.0	0.0	0.0	0.0	0.0	1357.0	0.0	0.0	0.0	10.0
OTU 51	0.0	0.0	629.0	0.0	0.0	0.0	0.0	0.0	0.0	0.0	0.0	0.0	0.0	0.0	0.0	0.0	0.0	0.0	0.0	0.0	0.0	0.0	0.0	0.0	0.0	0.0	1457.0	0.0	0.0	0.0	16.0
OTU 52	56.0	48.0	26.0	101.0	32.0	52.0	78.0	20.0	77.0	34.0	72.0	86.0	169.0	87.0	16.0	48.0	18.0	15.0	52.0	9.0	99.0	63.0	162.0	72.0	85.0	144.0	67.0	106.0	26.0	84.0	22.0
OTU 53	19.0	0.0	32.0	107.0	94.0	95.0	29.0	30.0	94.0	38.0	39.0	63.0	26.0	50.0	9.0	84.0	0.0	0.0	41.0	18.0	100.0	20.0	124.0	156.0	341.0	158.0	48.0	125.0	14.0	45.0	13.0
OTU 54	47.0	41.0	23.0	107.0	28.0	65.0	60.0	21.0	84.0	40.0	70.0	84.0	191.0	61.0	23.0	40.0	24.0	22.0	41.0	21.0	86.0	83.0	203.0	59.0	69.0	127.0	66.0	81.0	27.0	93.0	9.0
OTU 55	0.0	0.0	845.0	0.0	0.0	0.0	0.0	0.0	0.0	0.0	0.0	0.0	0.0	0.0	2.0	0.0	0.0	0.0	0.0	0.0	0.0	0.0	0.0	0.0	0.0	0.0	1129.0	0.0	0.0	0.0	0.0
OTU 56	35.0	0.0	39.0	94.0	151.0	56.0	35.0	8.0	46.0	20.0	32.0	38.0	0.0	30.0	9.0	42.0	0.0	0.0	36.0	4.0	76.0	23.0	67.0	137.0	295.0	316.0	73.0	183.0	65.0	17.0	27.0
OTU 57	162.0	164.0	33.0	12.0	107.0	108.0	51.0	42.0	94.0	36.0	41.0	17.0	58.0	26.0	40.0	6.0	171.0	135.0	107.0	17.0	14.0	32.0	13.0	45.0	46.0	165.0	22.0	99.0	35.0	10.0	38.0
OTU 58	124.0	88.0	25.0	67.0	34.0	31.0	104.0	25.0	64.0	32.0	57.0	41.0	81.0	39.0	9.0	18.0	7.0	16.0	34.0	18.0	71.0	48.0	96.0	51.0	71.0	276.0	111.0	181.0	35.0	47.0	18.0
OTU 59	89.0	128.0	22.0	108.0	23.0	81.0	65.0	18.0	80.0	29.0	80.0	67.0	204.0	143.0	17.0	59.0	0.0	0.0	18.0	9.0	53.0	20.0	145.0	85.0	161.0	50.0	17.0	48.0	25.0	47.0	12.0
OTU 60	215.0	92.0	0.0	0.0	30.0	9.0	20.0	0.0	0.0	0.0	9.0	0.0	0.0	0.0	3.0	0.0	13.0	7.0	505.0	0.0	0.0	0.0	0.0	0.0	0.0	0.0	35.0	0.0	883.0	11.0	0.0
OTU 61	20.0	0.0	37.0	99.0	122.0	58.0	35.0	30.0	61.0	42.0	31.0	56.0	21.0	29.0	10.0	65.0	0.0	0.0	24.0	17.0	85.0	31.0	76.0	137.0	277.0	206.0	56.0	157.0	0.0	27.0	12.0
OTU 62	0.0	0.0	636.0	0.0	0.0	0.0	0.0	0.0	0.0	0.0	0.0	0.0	0.0	0.0	1.0	0.0	0.0	0.0	0.0	0.0	0.0	0.0	0.0	0.0	0.0	0.0	1140.0	0.0	0.0	0.0	0.0
OTU 63	91.0	156.0	20.0	17.0	92.0	28.0	50.0	100.0	32.0	39.0	26.0	31.0	108.0	61.0	0.0	42.0	0.0	0.0	0.0	25.0	41.0	42.0	206.0	88.0	134.0	20.0	61.0	36.0	57.0	31.0	0.0
OTU 64	58.0	54.0	0.0	24.0	65.0	135.0	20.0	55.0	82.0	50.0	30.0	36.0	77.0	32.0	32.0	14.0	246.0	238.0	44.0	28.0	30.0	35.0	24.0	39.0	38.0	40.0	19.0	47.0	18.0	12.0	12.0
OTU 65	205.0	273.0	11.0	17.0	121.0	7.0	37.0	0.0	26.0	28.0	12.0	16.0	63.0	27.0	0.0	27.0	0.0	0.0	0.0	23.0	39.0	38.0	146.0	65.0	128.0	41.0	44.0	53.0	70.0	14.0	96.0
OTU 66	0.0	0.0	0.0	0.0	0.0	0.0	135.0	0.0	0.0	18.0	67.0	84.0	0.0	18.0	22.0	0.0	0.0	0.0	0.0	24.0	0.0	0.0	0.0	0.0	0.0	853.0	14.0	269.0	0.0	0.0	61.0
OTU 67	52.0	15.0	19.0	43.0	60.0	22.0	44.0	18.0	76.0	77.0	46.0	28.0	65.0	29.0	20.0	76.0	39.0	29.0	33.0	19.0	41.0	27.0	49.0	112.0	89.0	107.0	26.0	63.0	32.0	30.0	25.0
OTU 68	0.0	0.0	0.0	0.0	45.0	35.0	173.0	142.0	13.0	0.0	107.0	40.0	0.0	20.0	96.0	17.0	0.0	0.0	36.0	91.0	22.0	103.0	22.0	0.0	0.0	33.0	34.0	34.0	0.0	61.0	242.0
OTU 69	0.0	0.0	23.0	0.0	0.0	0.0	0.0	0.0	0.0	0.0	0.0	0.0	0.0	0.0	1330.0	0.0	0.0	0.0	0.0	0.0	0.0	0.0	0.0	0.0	0.0	0.0	0.0	0.0	0.0	0.0	0.0
OTU 70	64.0	152.0	28.0	13.0	72.0	14.0	36.0	0.0	26.0	42.0	0.0	13.0	96.0	34.0	21.0	35.0	0.0	0.0	0.0	19.0	58.0	45.0	165.0	78.0	147.0	31.0	52.0	26.0	48.0	25.0	0.0
OTU 71	35.0	24.0	5.0	36.0	42.0	13.0	48.0	9.0	99.0	61.0	40.0	33.0	95.0	29.0	25.0	87.0	36.0	37.0	23.0	23.0	42.0	49.0	51.0	103.0	92.0	77.0	26.0	56.0	20.0	19.0	0.0
OTU 72	112.0	168.0	13.0	15.0	83.0	7.0	30.0	0.0	18.0	51.0	16.0	20.0	77.0	41.0	0.0	38.0	0.0	0.0	0.0	30.0	43.0	29.0	128.0	53.0	138.0	51.0	32.0	40.0	43.0	17.0	40.0
OTU 73	96.0	26.0	12.0	29.0	45.0	6.0	70.0	14.0	50.0	41.0	22.0	23.0	54.0	13.0	17.0	32.0	12.0	16.0	26.0	7.0	26.0	14.0	20.0	86.0	98.0	212.0	31.0	109.0	50.0	5.0	34.0
OTU 74	84.0	140.0	74.0	53.0	0.0	79.0	0.0	43.0	16.0	0.0	0.0	11.0	15.0	13.0	4.0	175.0	17.0	17.0	26.0	25.0	0.0	10.0	0.0	122.0	0.0	9.0	161.0	16.0	0.0	8.0	177.0
OTU 75	0.0	0.0	0.0	0.0	16.0	51.0	104.0	138.0	12.0	0.0	101.0	44.0	0.0	33.0	125.0	22.0	0.0	0.0	62.0	92.0	36.0	107.0	45.0	0.0	0.0	24.0	19.0	32.0	0.0	80.0	116.0
OTU 76	106.0	124.0	12.0	31.0	52.0	6.0	31.0	28.0	11.0	34.0	19.0	19.0	64.0	26.0	0.0	19.0	0.0	3.0	16.0	0.0	43.0	18.0	49.0	88.0	35.0	78.0	65.0	67.0	66.0	18.0	105.0
OTU 77	30.0	33.0	18.0	27.0	27.0	46.0	38.0	23.0	21.0	47.0	43.0	47.0	82.0	65.0	20.0	53.0	48.0	39.0	4.0	14.0	38.0	24.0	17.0	41.0	86.0	94.0	43.0	68.0	34.0	9.0	25.0
OTU 78	17.0	0.0	24.0	183.0	79.0	34.0	23.0	27.0	42.0	23.0	12.0	33.0	0.0	40.0	16.0	27.0	0.0	0.0	32.0	9.0	127.0	18.0	44.0	107.0	31.0	97.0	38.0	51.0	7.0	39.0	16.0
OTU 79	58.0	92.0	15.0	20.0	55.0	21.0	0.0	0.0	33.0	32.0	0.0	31.0	108.0	65.0	0.0	57.0	0.0	0.0	0.0	25.0	30.0	37.0	161.0	70.0	123.0	23.0	43.0	29.0	29.0	21.0	0.0
OTU 80	43.0	30.0	69.0	41.0	68.0	19.0	50.0	0.0	30.0	32.0	36.0	34.0	84.0	47.0	0.0	50.0	20.0	15.0	31.0	0.0	84.0	43.0	23.0	23.0	38.0	49.0	47.0	49.0	0.0	120.0	0.0
OTU 81	65.0	59.0	38.0	37.0	45.0	14.0	35.0	35.0	15.0	38.0	24.0	34.0	121.0	48.0	0.0	26.0	48.0	10.0	23.0	0.0	50.0	20.0	55.0	98.0	38.0	49.0	42.0	33.0	37.0	37.0	0.0
OTU 82	30.0	40.0	25.0	49.0	44.0	28.0	32.0	36.0	26.0	46.0	23.0	28.0	132.0	56.0	0.0	25.0	22.0	15.0	21.0	50.0	37.0	22.0	70.0	93.0	34.0	41.0	37.0	40.0	24.0	35.0	0.0
OTU 83	22.0	33.0	14.0	20.0	29.0	54.0	17.0	25.0	36.0	61.0	49.0	55.0	84.0	60.0	21.0	48.0	45.0	43.0	3.0	29.0	22.0	9.0	30.0	29.0	80.0	82.0	33.0	60.0	14.0	33.0	12.0
OTU 84	0.0	0.0	0.0	48.0	29.0	46.0	83.0	150.0	27.0	0.0	94.0	65.0	0.0	57.0	145.0	34.0	0.0	0.0	0.0	81.0	27.0	113.0	0.0	0.0	0.0	27.0	11.0	18.0	0.0	0.0	97.0
OTU 85	0.0	0.0	0.0	0.0	0.0	0.0	92.0	0.0	0.0	34.0	81.0	154.0	0.0	27.0	38.0	0.0	0.0	0.0	0.0	21.0	0.0	0.0	0.0	0.0	0.0	465.0	10.0	189.0	0.0	0.0	27.0
OTU 86	13.0	0.0	19.0	150.0	66.0	28.0	20.0	13.0	30.0	30.0	21.0	48.0	0.0	40.0	25.0	25.0	0.0	0.0	42.0	11.0	117.0	25.0	44.0	108.0	44.0	73.0	24.0	48.0	5.0	34.0	20.0
OTU 87	0.0	0.0	17.0	42.0	123.0	0.0	38.0	26.0	18.0	10.0	16.0	25.0	17.0	9.0	29.0	9.0	0.0	0.0	38.0	11.0	53.0	52.0	41.0	26.0	63.0	177.0	0.0	87.0	38.0	23.0	92.0
OTU 88	26.0	26.0	31.0	106.0	95.0	13.0	18.0	17.0	27.0	23.0	9.0	19.0	0.0	19.0	11.0	20.0	0.0	0.0	40.0	8.0	78.0	16.0	29.0	93.0	35.0	140.0	53.0	67.0	7.0	18.0	30.0
OTU 89	0.0	0.0	389.0	0.0	0.0	0.0	0.0	0.0	0.0	0.0	0.0	0.0	0.0	0.0	0.0	0.0	0.0	0.0	0.0	0.0	0.0	0.0	0.0	0.0	0.0	0.0	679.0	0.0	0.0	0.0	0.0
OTU 90	11.0	0.0	21.0	22.0	60.0	50.0	22.0	22.0	114.0	23.0	16.0	60.0	12.0	62.0	16.0	0.0	0.0	0.0	8.0	0.0	40.0	33.0	67.0	43.0	41.0	123.0	25.0	97.0	8.0	43.0	18.0
OTU 91	14.0	0.0	20.0	119.0	62.0	23.0	28.0	27.0	29.0	23.0	25.0	24.0	4.0	25.0	25.0	18.0	0.0	0.0	47.0	14.0	117.0	18.0	46.0	99.0	36.0	78.0	31.0	43.0	0.0	29.0	24.0
OTU 92	80.0	30.0	0.0	0.0	21.0	21.0	7.0	0.0	0.0	0.0	7.0	0.0	0.0	0.0	11.0	0.0	26.0	18.0	428.0	0.0	0.0	0.0	0.0	0.0	0.0	0.0	22.0	0.0	330.0	20.0	0.0
OTU 93	9.0	0.0	27.0	16.0	53.0	51.0	23.0	20.0	111.0	20.0	36.0	49.0	6.0	54.0	13.0	0.0	0.0	0.0	24.0	0.0	36.0	35.0	105.0	41.0	45.0	96.0	17.0	70.0	6.0	54.0	2.0
OTU 94	0.0	0.0	0.0	0.0	0.0	94.0	0.0	187.0	95.0	0.0	0.0	207.0	0.0	0.0	0.0	109.0	0.0	0.0	0.0	21.0	23.0	35.0	105.0	0.0	0.0	0.0	21.0	0.0	0.0	98.0	24.0
OTU 95	0.0	0.0	0.0	0.0	0.0	111.0	0.0	200.0	102.0	0.0	0.0	261.0	0.0	0.0	60.0	0.0	0.0	0.0	0.0	13.0	26.0	37.0	0.0	0.0	41.0	0.0	26.0	0.0	0.0	108.0	23.0
OTU 96	68.0	57.0	13.0	18.0	16.0	27.0	59.0	15.0	23.0	28.0	18.0	19.0	42.0	39.0	9.0	27.0	20.0	21.0	8.0	9.0	15.0	16.0	9.0	32.0	74.0	150.0	56.0	94.0	0.0	10.0	14.0
OTU 97	109.0	0.0	0.0	0.0	19.0	44.0	205.0	0.0	0.0	0.0	98.0	25.0	0.0	38.0	0.0	0.0	0.0	0.0	10.0	0.0	0.0	0.0	0.0	0.0	0.0	0.0	431.0	0.0	0.0	22.0	0.0
OTU 98	21.0	19.0	0.0	29.0	0.0	71.0	27.0	0.0	19.0	49.0	21.0	26.0	117.0	75.0	18.0	42.0	26.0	23.0	19.0	0.0	69.0	16.0	96.0	30.0	34.0	33.0	26.0	24.0	0.0	47.0	21.0
OTU 99	29.0	27.0	0.0	39.0	51.0	19.0	36.0	53.0	32.0	28.0	40.0	42.0	92.0	49.0	102.0	46.0	15.0	11.0	30.0	69.0	0.0	18.0	0.0	20.0	33.0	45.0	0.0	36.0	19.0	0.0	0.0
OTU 100	9.0	0.0	25.0	146.0	42.0	27.0	17.0	0.0	49.0	16.0	15.0	36.0	0.0	31.0	19.0	24.0	0.0	0.0	31.0	8.0	130.0	26.0	43.0	92.0	36.0	47.0	23.0	26.0	3.0	40.0	14.0
OTU 101	0.0	0.0	39.0	0.0	0.0	0.0	66.0	0.0	0.0	24.0	66.0	119.0	0.0	27.0	0.0	0.0	0.0	0.0	0.0	16.0	58.0	0.0	0.0	0.0	0.0	370.0	11.0	140.0	0.0	14.0	25.0
OTU 102	61.0	0.0	12.0	38.0	111.0	12.0	40.0	32.0	28.0	17.0	12.0	32.0	13.0	11.0	0.0	21.0	0.0	0.0	18.0	12.0	62.0	60.0	33.0	22.0	65.0	126.0	0.0	103.0	17.0	14.0	0.0
OTU 103	70.0	86.0	26.0	17.0	8.0	20.0	26.0	18.0	13.0	21.0	16.0	23.0	50.0	29.0	11.0	30.0	13.0	27.0	17.0	14.0	15.0	23.0	14.0	19.0	31.0	57.0	54.0	78.0	93.0	22.0	27.0
OTU 104	0.0	0.0	10.0	49.0	81.0	21.0	25.0	25.0	26.0	30.0	28.0	60.0	15.0	21.0	0.0	29.0	0.0	0.0	26.0	22.0	87.0	73.0	80.0	22.0	80.0	73.0	0.0	42.0	10.0	27.0	0.0
OTU 105	19.0	35.0	0.0	14.0	92.0	30.0	28.0	0.0	31.0	27.0	35.0	42.0	117.0	47.0	0.0	16.0	136.0	125.0	0.0	0.0	0.0	12.0	28.0	24.0	30.0	19.0	0.0	14.0	38.0	0.0	0.0
OTU 106	15.0	0.0	0.0	81.0	60.0	25.0	27.0	24.0	24.0	14.0	29.0	40.0	54.0	26.0	102.0	74.0	33.0	19.0	23.0	33.0	36.0	28.0	33.0	19.0	23.0	29.0	13.0	24.0	21.0	28.0	0.0
OTU 107	0.0	0.0	0.0	38.0	3.0	29.0	69.0	114.0	32.0	8.0	80.0	58.0	0.0	35.0	19.0	23.0	0.0	0.0	9.0	33.0	65.0	62.0	36.0	14.0	0.0	43.0	36.0	33.0	0.0	79.0	29.0
OTU 108	28.0	21.0	0.0	25.0	0.0	64.0	24.0	0.0	19.0	46.0	18.0	13.0	116.0	83.0	19.0	22.0	14.0	0.0	27.0	0.0	60.0	19.0	94.0	22.0	41.0	56.0	38.0	16.0	0.0	40.0	19.0
OTU 109	0.0	0.0	25.0	0.0	0.0	0.0	0.0	0.0	0.0	0.0	0.0	0.0	0.0	0.0	901.0	0.0	0.0	0.0	0.0	0.0	0.0	0.0	0.0	0.0	0.0	0.0	2.0	0.0	0.0	0.0	0.0
OTU 110	36.0	28.0	11.0	51.0	31.0	10.0	17.0	13.0	17.0	51.0	31.0	21.0	111.0	30.0	0.0	19.0	11.0	6.0	19.0	36.0	45.0	21.0	45.0	70.0	44.0	42.0	35.0	32.0	15.0	27.0	0.0
OTU 111	25.0	0.0	22.0	18.0	57.0	21.0	32.0	0.0	61.0	7.0	13.0	16.0	0.0	31.0	0.0	0.0	0.0	0.0	0.0	10.0	29.0	25.0	54.0	33.0	52.0	185.0	29.0	138.0	12.0	26.0	23.0
OTU 112	28.0	25.0	27.0	48.0	30.0	24.0	12.0	20.0	30.0	54.0	15.0	43.0	103.0	38.0	0.0	21.0	0.0	19.0	37.0	0.0	36.0	20.0	49.0	83.0	41.0	23.0	20.0	20.0	13.0	35.0	0.0
OTU 113	19.0	18.0	0.0	35.0	24.0	56.0	18.0	0.0	19.0	36.0	22.0	18.0	58.0	68.0	16.0	31.0	17.0	16.0	19.0	35.0	77.0	20.0	87.0	17.0	41.0	32.0	27.0	20.0	0.0	53.0	10.0
OTU 114	0.0	0.0	152.0	0.0	0.0	0.0	0.0	0.0	0.0	0.0	0.0	0.0	0.0	0.0	0.0	0.0	0.0	0.0	0.0	0.0	0.0	0.0	0.0	0.0	0.0	0.0	494.0	0.0	0.0	0.0	246.0
OTU 115	0.0	0.0	0.0	0.0	3.0	0.0	53.0	71.0	81.0	15.0	50.0	35.0	0.0	15.0	28.0	0.0	0.0	0.0	0.0	139.0	64.0	92.0	23.0	31.0	0.0	35.0	11.0	24.0	0.0	44.0	74.0
OTU 116	54.0	80.0	0.0	5.0	128.0	22.0	42.0	0.0	33.0	23.0	23.0	19.0	52.0	15.0	0.0	2.0	60.0	64.0	0.0	0.0	0.0	13.0	14.0	20.0	38.0	35.0	0.0	34.0	108.0	0.0	0.0
OTU 117	21.0	17.0	53.0	87.0	71.0	23.0	27.0	17.0	11.0	15.0	30.0	28.0	41.0	24.0	0.0	50.0	15.0	0.0	38.0	24.0	33.0	22.0	25.0	22.0	33.0	36.0	30.0	31.0	25.0	17.0	0.0
OTU 118	0.0	0.0	0.0	28.0	7.0	9.0	117.0	84.0	9.0	3.0	55.0	24.0	0.0	8.0	14.0	15.0	0.0	0.0	16.0	38.0	45.0	49.0	21.0	23.0	6.0	88.0	36.0	63.0	0.0	41.0	65.0
OTU 119	0.0	0.0	0.0	0.0	5.0	0.0	44.0	74.0	65.0	17.0	61.0	21.0	0.0	11.0	38.0	22.0	0.0	0.0	0.0	146.0	60.0	114.0	16.0	16.0	0.0	27.0	9.0	17.0	0.0	42.0	51.0
OTU 120	0.0	0.0	0.0	78.0	6.0	0.0	39.0	78.0	50.0	13.0	39.0	33.0	0.0	19.0	39.0	0.0	0.0	0.0	0.0	155.0	46.0	91.0	13.0	29.0	0.0	26.0	0.0	24.0	0.0	47.0	27.0
OTU 121	0.0	0.0	110.0	15.0	0.0	31.0	0.0	36.0	67.0	68.0	0.0	21.0	0.0	55.0	17.0	0.0	0.0	0.0	0.0	15.0	72.0	19.0	49.0	82.0	73.0	28.0	24.0	20.0	12.0	23.0	13.0
OTU 122	0.0	0.0	0.0	0.0	16.0	0.0	135.0	0.0	0.0	0.0	126.0	47.0	0.0	91.0	0.0	0.0	0.0	0.0	14.0	0.0	0.0	0.0	0.0	0.0	0.0	0.0	344.0	0.0	0.0	65.0	0.0
OTU 123	16.0	0.0	0.0	64.0	24.0	21.0	11.0	27.0	68.0	24.0	17.0	16.0	21.0	55.0	61.0	22.0	39.0	109.0	11.0	12.0	46.0	20.0	22.0	26.0	22.0	18.0	20.0	15.0	0.0	24.0	0.0
OTU 124	36.0	40.0	0.0	23.0	0.0	31.0	35.0	0.0	15.0	38.0	20.0	7.0	60.0	37.0	9.0	13.0	0.0	0.0	19.0	0.0	46.0	21.0	46.0	6.0	36.0	81.0	43.0	44.0	73.0	27.0	18.0
OTU 125	0.0	0.0	24.0	21.0	53.0	53.0	19.0	0.0	77.0	8.0	14.0	34.0	0.0	30.0	9.0	0.0	0.0	0.0	0.0	0.0	26.0	30.0	57.0	51.0	36.0	114.0	39.0	90.0	8.0	30.0	0.0
OTU 126	48.0	59.0	0.0	15.0	70.0	7.0	25.0	0.0	10.0	19.0	10.0	0.0	0.0	11.0	0.0	15.0	29.0	25.0	7.0	0.0	0.0	13.0	0.0	32.0	20.0	96.0	0.0	49.0	155.0	0.0	103.0
OTU 127	26.0	35.0	41.0	72.0	83.0	10.0	33.0	16.0	19.0	13.0	22.0	17.0	28.0	20.0	0.0	28.0	0.0	0.0	25.0	16.0	31.0	21.0	27.0	16.0	39.0	57.0	31.0	43.0	41.0	5.0	0.0
OTU 128	18.0	26.0	2.0	26.0	12.0	23.0	25.0	22.0	24.0	47.0	23.0	34.0	49.0	43.0	11.0	41.0	25.0	26.0	0.0	19.0	18.0	14.0	15.0	40.0	47.0	71.0	32.0	64.0	0.0	11.0	6.0
OTU 129	0.0	0.0	43.0	36.0	4.0	12.0	81.0	105.0	14.0	9.0	52.0	35.0	0.0	16.0	18.0	13.0	0.0	0.0	13.0	36.0	42.0	42.0	28.0	13.0	4.0	47.0	31.0	22.0	0.0	43.0	49.0
OTU 130	0.0	0.0	0.0	0.0	18.0	0.0	47.0	76.0	62.0	8.0	43.0	17.0	0.0	22.0	18.0	0.0	0.0	0.0	0.0	139.0	72.0	68.0	20.0	27.0	0.0	21.0	15.0	21.0	0.0	32.0	73.0
OTU 131	0.0	0.0	0.0	18.0	0.0	20.0	0.0	39.0	72.0	60.0	0.0	24.0	0.0	56.0	18.0	0.0	0.0	0.0	0.0	27.0	68.0	19.0	55.0	80.0	88.0	23.0	27.0	33.0	15.0	43.0	11.0
OTU 132	0.0	0.0	0.0	0.0	8.0	0.0	84.0	48.0	50.0	0.0	34.0	17.0	0.0	12.0	23.0	0.0	0.0	0.0	0.0	92.0	45.0	72.0	11.0	28.0	0.0	49.0	19.0	46.0	0.0	23.0	131.0
OTU 133	0.0	0.0	0.0	0.0	0.0	0.0	97.0	0.0	0.0	0.0	125.0	46.0	0.0	83.0	107.0	0.0	0.0	0.0	24.0	0.0	0.0	0.0	0.0	0.0	0.0	0.0	247.0	0.0	0.0	62.0	0.0
OTU 134	0.0	0.0	0.0	0.0	0.0	89.0	0.0	176.0	106.0	0.0	0.0	240.0	0.0	0.0	0.0	0.0	0.0	0.0	0.0	16.0	20.0	28.0	0.0	0.0	0.0	0.0	17.0	0.0	0.0	76.0	16.0
OTU 135	23.0	141.0	0.0	0.0	54.0	0.0	17.0	0.0	19.0	0.0	26.0	38.0	43.0	41.0	0.0	15.0	0.0	0.0	0.0	0.0	12.0	68.0	0.0	20.0	33.0	15.0	43.0	25.0	42.0	105.0	0.0
OTU 136	52.0	24.0	0.0	44.0	80.0	26.0	11.0	5.0	20.0	20.0	5.0	7.0	81.0	21.0	0.0	31.0	18.0	19.0	108.0	25.0	8.0	16.0	19.0	21.0	27.0	21.0	12.0	19.0	37.0	0.0	0.0
OTU 137	24.0	23.0	0.0	38.0	24.0	17.0	43.0	0.0	37.0	21.0	38.0	32.0	64.0	31.0	0.0	47.0	9.0	9.0	19.0	0.0	0.0	64.0	74.0	58.0	19.0	35.0	20.0	24.0	0.0	0.0	0.0
OTU 138	24.0	5.0	60.0	40.0	75.0	30.0	11.0	19.0	32.0	17.0	6.0	20.0	67.0	13.0	0.0	33.0	36.0	29.0	0.0	30.0	15.0	14.0	31.0	22.0	50.0	29.0	12.0	27.0	0.0	21.0	0.0
OTU 139	57.0	120.0	22.0	11.0	26.0	22.0	51.0	0.0	12.0	9.0	20.0	0.0	19.0	11.0	8.0	24.0	14.0	3.0	9.0	12.0	14.0	16.0	17.0	26.0	29.0	99.0	23.0	71.0	0.0	5.0	17.0
OTU 140	0.0	0.0	0.0	0.0	14.0	0.0	58.0	62.0	57.0	7.0	36.0	29.0	0.0	28.0	26.0	0.0	0.0	0.0	0.0	128.0	50.0	70.0	8.0	32.0	27.0	38.0	0.0	33.0	0.0	36.0	28.0
OTU 141	24.0	37.0	0.0	8.0	59.0	35.0	26.0	53.0	46.0	20.0	18.0	0.0	95.0	0.0	0.0	0.0	90.0	90.0	15.0	0.0	0.0	15.0	27.0	29.0	24.0	25.0	0.0	27.0	0.0	0.0	0.0
OTU 142	0.0	0.0	0.0	0.0	4.0	0.0	43.0	50.0	77.0	13.0	36.0	36.0	0.0	12.0	35.0	12.0	0.0	0.0	0.0	125.0	47.0	54.0	13.0	26.0	0.0	25.0	24.0	16.0	0.0	55.0	56.0
OTU 143	0.0	0.0	0.0	0.0	0.0	0.0	116.0	0.0	0.0	0.0	127.0	31.0	0.0	69.0	0.0	69.0	0.0	51.0	19.0	0.0	0.0	0.0	0.0	0.0	0.0	0.0	232.0	0.0	0.0	39.0	0.0
OTU 144	0.0	0.0	0.0	31.0	0.0	92.0	0.0	163.0	79.0	0.0	0.0	220.0	0.0	0.0	0.0	0.0	0.0	0.0	0.0	14.0	12.0	40.0	0.0	0.0	0.0	0.0	11.0	0.0	0.0	65.0	21.0
OTU 145	0.0	0.0	0.0	17.0	0.0	21.0	128.0	20.0	45.0	43.0	0.0	0.0	0.0	32.0	9.0	0.0	0.0	0.0	0.0	20.0	52.0	28.0	43.0	82.0	68.0	41.0	33.0	17.0	29.0	7.0	13.0
OTU 146	33.0	0.0	25.0	20.0	10.0	42.0	24.0	0.0	20.0	22.0	26.0	0.0	34.0	28.0	16.0	45.0	25.0	31.0	16.0	19.0	25.0	25.0	15.0	36.0	49.0	63.0	12.0	48.0	0.0	12.0	12.0
OTU 147	40.0	0.0	0.0	10.0	50.0	20.0	41.0	0.0	7.0	11.0	26.0	0.0	15.0	13.0	8.0	19.0	17.0	9.0	0.0	9.0	5.0	17.0	7.0	25.0	44.0	87.0	21.0	77.0	106.0	5.0	42.0
OTU 148	0.0	0.0	0.0	63.0	0.0	46.0	41.0	68.0	48.0	43.0	38.0	24.0	0.0	0.0	24.0	0.0	0.0	0.0	0.0	17.0	38.0	31.0	0.0	0.0	0.0	71.0	30.0	92.0	30.0	0.0	25.0
OTU 149	0.0	0.0	0.0	0.0	0.0	73.0	0.0	202.0	85.0	0.0	0.0	203.0	0.0	0.0	0.0	0.0	0.0	0.0	0.0	18.0	19.0	21.0	0.0	0.0	0.0	0.0	22.0	0.0	0.0	49.0	34.0
OTU 150	0.0	0.0	0.0	10.0	24.0	15.0	7.0	22.0	18.0	12.0	26.0	0.0	18.0	5.0	0.0	14.0	90.0	73.0	0.0	74.0	51.0	56.0	21.0	0.0	34.0	61.0	5.0	67.0	0.0	17.0	0.0
OTU 151	140.0	88.0	27.0	22.0	24.0	0.0	0.0	0.0	51.0	10.0	0.0	13.0	26.0	22.0	0.0	19.0	6.0	4.0	0.0	0.0	0.0	0.0	0.0	29.0	20.0	45.0	98.0	22.0	53.0	0.0	0.0
OTU 152	0.0	0.0	0.0	0.0	0.0	42.0	43.0	66.0	36.0	0.0	28.0	0.0	0.0	0.0	19.0	0.0	0.0	0.0	0.0	13.0	33.0	36.0	86.0	48.0	0.0	87.0	32.0	107.0	0.0	0.0	36.0
OTU 153	12.0	0.0	0.0	15.0	0.0	36.0	22.0	0.0	19.0	21.0	30.0	66.0	32.0	15.0	23.0	65.0	29.0	23.0	14.0	21.0	12.0	30.0	23.0	32.0	44.0	48.0	26.0	33.0	0.0	0.0	16.0
OTU 154	0.0	0.0	0.0	0.0	2.0	0.0	40.0	92.0	42.0	8.0	38.0	33.0	0.0	10.0	27.0	0.0	0.0	0.0	0.0	130.0	52.0	89.0	6.0	31.0	0.0	25.0	8.0	26.0	0.0	18.0	28.0
OTU 155	79.0	0.0	58.0	25.0	12.0	0.0	0.0	0.0	62.0	25.0	0.0	20.0	40.0	32.0	0.0	27.0	13.0	10.0	0.0	0.0	0.0	0.0	89.0	40.0	21.0	35.0	63.0	23.0	30.0	0.0	0.0
OTU 156	47.0	75.0	81.0	8.0	95.0	11.0	38.0	0.0	17.0	13.0	11.0	0.0	51.0	0.0	0.0	4.0	43.0	50.0	0.0	0.0	0.0	0.0	10.0	16.0	33.0	48.0	0.0	30.0	0.0	15.0	0.0
OTU 157	0.0	0.0	0.0	0.0	0.0	90.0	0.0	192.0	69.0	0.0	0.0	163.0	0.0	0.0	0.0	0.0	0.0	0.0	0.0	16.0	16.0	34.0	0.0	0.0	0.0	0.0	15.0	0.0	0.0	69.0	30.0
OTU 158	28.0	32.0	76.0	8.0	19.0	12.0	16.0	6.0	22.0	2.0	29.0	14.0	20.0	8.0	79.0	2.0	0.0	3.0	0.0	4.0	110.0	25.0	31.0	24.0	0.0	40.0	0.0	42.0	0.0	0.0	41.0
OTU 159	0.0	0.0	0.0	35.0	49.0	0.0	57.0	60.0	38.0	0.0	37.0	39.0	0.0	16.0	0.0	17.0	0.0	0.0	53.0	16.0	13.0	73.0	0.0	45.0	0.0	44.0	31.0	40.0	16.0	0.0	14.0
OTU 160	52.0	0.0	22.0	44.0	9.0	0.0	0.0	0.0	92.0	25.0	0.0	25.0	61.0	39.0	0.0	49.0	25.0	17.0	0.0	30.0	0.0	0.0	0.0	50.0	32.0	24.0	48.0	17.0	26.0	0.0	0.0
OTU 161	27.0	0.0	0.0	48.0	0.0	37.0	29.0	0.0	23.0	0.0	21.0	149.0	127.0	0.0	0.0	0.0	0.0	0.0	0.0	0.0	19.0	46.0	32.0	44.0	23.0	0.0	23.0	0.0	0.0	0.0	38.0
OTU 162	10.0	0.0	0.0	27.0	8.0	14.0	65.0	66.0	22.0	4.0	81.0	32.0	0.0	11.0	9.0	25.0	0.0	0.0	6.0	41.0	33.0	45.0	31.0	13.0	7.0	29.0	14.0	21.0	0.0	45.0	27.0
OTU 163	0.0	0.0	0.0	31.0	41.0	0.0	40.0	66.0	50.0	0.0	47.0	21.0	0.0	21.0	70.0	15.0	0.0	0.0	0.0	11.0	12.0	64.0	0.0	27.0	0.0	41.0	23.0	33.0	0.0	53.0	20.0
OTU 164	28.0	94.0	56.0	0.0	0.0	0.0	17.0	0.0	15.0	22.0	26.0	39.0	45.0	54.0	0.0	18.0	0.0	0.0	83.0	0.0	22.0	0.0	0.0	38.0	30.0	18.0	25.0	16.0	37.0	0.0	0.0
OTU 165	8.0	0.0	38.0	17.0	41.0	21.0	26.0	0.0	38.0	19.0	10.0	0.0	0.0	31.0	0.0	16.0	71.0	76.0	20.0	0.0	0.0	20.0	36.0	24.0	19.0	40.0	45.0	30.0	0.0	37.0	0.0
OTU 166	0.0	0.0	0.0	18.0	0.0	13.0	0.0	20.0	50.0	52.0	0.0	44.0	0.0	44.0	21.0	0.0	0.0	0.0	0.0	21.0	60.0	21.0	46.0	73.0	74.0	11.0	18.0	10.0	13.0	44.0	27.0
OTU 167	0.0	0.0	0.0	13.0	0.0	9.0	9.0	17.0	18.0	26.0	0.0	0.0	13.0	10.0	26.0	8.0	81.0	79.0	0.0	76.0	51.0	0.0	21.0	0.0	26.0	83.0	4.0	88.0	0.0	22.0	0.0
OTU 168	0.0	0.0	0.0	124.0	0.0	0.0	47.0	60.0	0.0	33.0	28.0	93.0	0.0	0.0	32.0	0.0	0.0	0.0	0.0	35.0	0.0	33.0	0.0	0.0	0.0	40.0	0.0	38.0	0.0	98.0	14.0
OTU 169	65.0	504.0	0.0	0.0	0.0	0.0	62.0	0.0	0.0	0.0	43.0	0.0	0.0	0.0	0.0	0.0	0.0	0.0	0.0	0.0	0.0	0.0	0.0	0.0	0.0	0.0	0.0	0.0	0.0	0.0	0.0
OTU 170	0.0	0.0	0.0	17.0	0.0	10.0	15.0	28.0	27.0	19.0	0.0	0.0	31.0	17.0	44.0	8.0	94.0	87.0	0.0	31.0	42.0	0.0	18.0	0.0	0.0	87.0	10.0	82.0	0.0	5.0	0.0
OTU 171	0.0	0.0	12.0	30.0	0.0	19.0	26.0	30.0	0.0	67.0	19.0	0.0	0.0	27.0	61.0	63.0	29.0	35.0	27.0	33.0	26.0	25.0	0.0	0.0	0.0	80.0	0.0	0.0	30.0	7.0	24.0
OTU 172	25.0	4.0	0.0	18.0	21.0	42.0	4.0	13.0	31.0	18.0	6.0	28.0	106.0	9.0	17.0	38.0	43.0	46.0	0.0	18.0	14.0	19.0	29.0	24.0	32.0	24.0	6.0	25.0	0.0	7.0	0.0
OTU 173	10.0	97.0	41.0	0.0	0.0	0.0	20.0	0.0	26.0	18.0	35.0	26.0	38.0	45.0	64.0	12.0	0.0	0.0	51.0	0.0	9.0	0.0	0.0	20.0	25.0	25.0	29.0	40.0	32.0	0.0	0.0
OTU 174	0.0	0.0	0.0	23.0	50.0	0.0	65.0	51.0	28.0	0.0	40.0	14.0	0.0	0.0	0.0	3.0	0.0	0.0	32.0	11.0	9.0	43.0	0.0	31.0	0.0	96.0	58.0	65.0	0.0	0.0	38.0
OTU 175	0.0	0.0	0.0	37.0	0.0	55.0	33.0	80.0	38.0	47.0	32.0	0.0	0.0	65.0	38.0	0.0	0.0	0.0	0.0	27.0	33.0	31.0	0.0	0.0	0.0	52.0	22.0	48.0	0.0	0.0	18.0
OTU 176	22.0	0.0	0.0	0.0	25.0	0.0	0.0	70.0	14.0	13.0	0.0	108.0	25.0	95.0	0.0	72.0	14.0	15.0	0.0	0.0	14.0	10.0	64.0	45.0	14.0	21.0	0.0	11.0	0.0	0.0	0.0
OTU 177	19.0	20.0	0.0	34.0	48.0	0.0	22.0	19.0	12.0	0.0	19.0	21.0	16.0	71.0	66.0	44.0	51.0	33.0	32.0	0.0	0.0	25.0	0.0	26.0	17.0	27.0	0.0	0.0	0.0	28.0	0.0
OTU 178	0.0	0.0	0.0	26.0	47.0	85.0	81.0	36.0	70.0	53.0	88.0	19.0	0.0	0.0	0.0	0.0	0.0	0.0	17.0	8.0	0.0	39.0	0.0	0.0	0.0	46.0	0.0	32.0	0.0	0.0	0.0
OTU 179	41.0	80.0	0.0	44.0	36.0	10.0	40.0	21.0	0.0	8.0	0.0	5.0	8.0	0.0	0.0	13.0	0.0	0.0	24.0	9.0	20.0	21.0	19.0	11.0	20.0	23.0	27.0	27.0	132.0	7.0	0.0
OTU 180	30.0	209.0	17.0	0.0	0.0	0.0	15.0	0.0	13.0	4.0	15.0	29.0	20.0	22.0	0.0	4.0	0.0	0.0	0.0	0.0	11.0	0.0	0.0	18.0	24.0	22.0	44.0	35.0	50.0	0.0	59.0
OTU 181	48.0	22.0	0.0	0.0	0.0	50.0	16.0	0.0	29.0	30.0	24.0	0.0	9.0	23.0	0.0	0.0	56.0	29.0	0.0	14.0	89.0	0.0	18.0	34.0	11.0	38.0	0.0	32.0	0.0	66.0	0.0
OTU 182	0.0	0.0	0.0	27.0	0.0	17.0	22.0	22.0	24.0	0.0	14.0	57.0	61.0	0.0	0.0	35.0	0.0	89.0	51.0	61.0	0.0	0.0	0.0	14.0	24.0	31.0	0.0	18.0	0.0	67.0	0.0
OTU 183	0.0	0.0	0.0	25.0	0.0	0.0	48.0	86.0	0.0	24.0	0.0	28.0	0.0	0.0	35.0	17.0	0.0	0.0	0.0	82.0	30.0	51.0	0.0	0.0	13.0	27.0	17.0	41.0	0.0	61.0	42.0
OTU 184	13.0	7.0	0.0	39.0	44.0	35.0	1.0	11.0	46.0	11.0	9.0	15.0	90.0	23.0	0.0	49.0	40.0	30.0	0.0	25.0	6.0	16.0	22.0	28.0	18.0	18.0	3.0	11.0	0.0	14.0	0.0
OTU 185	0.0	0.0	0.0	23.0	0.0	9.0	0.0	17.0	51.0	43.0	0.0	0.0	0.0	19.0	10.0	0.0	0.0	0.0	86.0	27.0	34.0	13.0	45.0	57.0	59.0	13.0	26.0	14.0	24.0	16.0	34.0
OTU 186	25.0	0.0	16.0	0.0	26.0	20.0	14.0	0.0	26.0	9.0	12.0	64.0	20.0	54.0	0.0	39.0	0.0	0.0	0.0	4.0	5.0	4.0	74.0	22.0	26.0	63.0	13.0	64.0	0.0	19.0	0.0
OTU 187	0.0	0.0	0.0	22.0	19.0	16.0	23.0	44.0	29.0	22.0	15.0	20.0	0.0	76.0	54.0	30.0	0.0	0.0	0.0	18.0	0.0	36.0	21.0	20.0	66.0	21.0	0.0	18.0	0.0	45.0	0.0
OTU 188	60.0	27.0	0.0	7.0	20.0	2.0	28.0	0.0	0.0	12.0	11.0	10.0	0.0	0.0	0.0	9.0	0.0	0.0	0.0	5.0	38.0	21.0	5.0	26.0	68.0	62.0	30.0	45.0	0.0	0.0	128.0
OTU 189	0.0	0.0	0.0	0.0	8.0	0.0	33.0	58.0	38.0	11.0	46.0	19.0	0.0	8.0	21.0	0.0	0.0	0.0	0.0	98.0	66.0	72.0	6.0	20.0	0.0	24.0	8.0	25.0	0.0	16.0	36.0
OTU 190	0.0	0.0	0.0	23.0	16.0	24.0	0.0	41.0	11.0	12.0	40.0	17.0	29.0	69.0	0.0	53.0	19.0	25.0	0.0	0.0	0.0	58.0	39.0	18.0	0.0	16.0	0.0	32.0	0.0	69.0	0.0
OTU 191	0.0	0.0	0.0	30.0	0.0	34.0	20.0	32.0	0.0	72.0	19.0	0.0	0.0	23.0	0.0	69.0	43.0	31.0	11.0	32.0	35.0	29.0	0.0	0.0	0.0	68.0	24.0	0.0	27.0	8.0	0.0
OTU 192	0.0	0.0	0.0	30.0	7.0	11.0	0.0	0.0	69.0	24.0	0.0	23.0	44.0	34.0	49.0	27.0	7.0	15.0	31.0	36.0	0.0	0.0	0.0	52.0	21.0	21.0	58.0	19.0	29.0	0.0	0.0
OTU 193	0.0	0.0	75.0	67.0	0.0	0.0	0.0	0.0	0.0	59.0	0.0	0.0	0.0	0.0	20.0	0.0	0.0	0.0	66.0	0.0	0.0	0.0	0.0	42.0	0.0	0.0	90.0	0.0	0.0	0.0	187.0
OTU 194	35.0	0.0	0.0	26.0	0.0	46.0	12.0	0.0	0.0	29.0	64.0	0.0	68.0	19.0	0.0	64.0	17.0	18.0	14.0	0.0	18.0	0.0	94.0	0.0	36.0	0.0	26.0	0.0	0.0	19.0	0.0
OTU 195	0.0	0.0	0.0	30.0	0.0	18.0	0.0	12.0	60.0	37.0	0.0	11.0	0.0	24.0	12.0	0.0	0.0	0.0	0.0	19.0	44.0	20.0	66.0	72.0	64.0	29.0	15.0	19.0	0.0	30.0	23.0
OTU 196	37.0	0.0	0.0	0.0	76.0	0.0	0.0	44.0	113.0	0.0	0.0	34.0	72.0	0.0	0.0	0.0	23.0	15.0	0.0	0.0	0.0	0.0	0.0	164.0	23.0	0.0	0.0	0.0	0.0	0.0	0.0
OTU 197	90.0	40.0	0.0	0.0	110.0	0.0	0.0	0.0	0.0	0.0	0.0	0.0	0.0	0.0	0.0	0.0	16.0	4.0	0.0	0.0	0.0	0.0	0.0	153.0	16.0	83.0	0.0	87.0	0.0	0.0	0.0
OTU 198	0.0	0.0	0.0	37.0	0.0	41.0	17.0	59.0	0.0	81.0	20.0	0.0	30.0	0.0	60.0	0.0	0.0	0.0	0.0	0.0	0.0	0.0	36.0	83.0	30.0	12.0	22.0	53.0	0.0	0.0	13.0
OTU 199	23.0	0.0	0.0	19.0	26.0	13.0	23.0	0.0	0.0	23.0	14.0	12.0	63.0	0.0	0.0	26.0	0.0	0.0	0.0	10.0	92.0	28.0	20.0	31.0	63.0	33.0	42.0	31.0	0.0	0.0	0.0
OTU 200	36.0	41.0	0.0	23.0	0.0	21.0	22.0	5.0	11.0	16.0	10.0	6.0	12.0	0.0	0.0	24.0	17.0	7.0	34.0	0.0	0.0	0.0	0.0	0.0	16.0	35.0	0.0	46.0	125.0	19.0	63.0
OTU 201	0.0	0.0	0.0	12.0	0.0	12.0	4.0	14.0	13.0	20.0	9.0	0.0	16.0	23.0	0.0	27.0	95.0	97.0	0.0	24.0	40.0	0.0	26.0	0.0	0.0	54.0	16.0	81.0	0.0	6.0	0.0
OTU 202	0.0	0.0	0.0	0.0	0.0	0.0	38.0	0.0	0.0	0.0	21.0	0.0	0.0	7.0	0.0	0.0	0.0	0.0	25.0	0.0	0.0	0.0	0.0	0.0	0.0	195.0	92.0	203.0	0.0	7.0	0.0
OTU 203	0.0	0.0	105.0	10.0	0.0	0.0	145.0	36.0	0.0	0.0	79.0	22.0	0.0	0.0	0.0	0.0	0.0	0.0	22.0	8.0	0.0	38.0	0.0	0.0	0.0	46.0	26.0	50.0	0.0	0.0	0.0
OTU 204	0.0	0.0	0.0	1.0	0.0	4.0	38.0	9.0	6.0	10.0	0.0	0.0	13.0	6.0	0.0	0.0	31.0	38.0	54.0	25.0	22.0	0.0	14.0	0.0	0.0	170.0	5.0	137.0	0.0	4.0	0.0
OTU 205	0.0	0.0	44.0	24.0	34.0	0.0	14.0	0.0	12.0	26.0	30.0	60.0	21.0	27.0	0.0	0.0	0.0	0.0	12.0	8.0	25.0	9.0	42.0	20.0	0.0	23.0	16.0	35.0	26.0	77.0	0.0
OTU 206	20.0	0.0	0.0	47.0	22.0	21.0	20.0	18.0	34.0	15.0	16.0	24.0	12.0	41.0	34.0	24.0	40.0	0.0	20.0	18.0	25.0	23.0	24.0	17.0	20.0	17.0	12.0	12.0	0.0	7.0	0.0
OTU 207	20.0	13.0	36.0	19.0	0.0	10.0	20.0	12.0	0.0	0.0	11.0	39.0	6.0	34.0	0.0	23.0	34.0	21.0	18.0	0.0	45.0	18.0	62.0	43.0	24.0	45.0	0.0	0.0	0.0	29.0	0.0
OTU 208	30.0	8.0	0.0	9.0	15.0	29.0	8.0	14.0	25.0	14.0	3.0	16.0	89.0	12.0	55.0	10.0	20.0	32.0	0.0	16.0	10.0	13.0	22.0	27.0	34.0	14.0	17.0	28.0	0.0	6.0	0.0
OTU 209	0.0	16.0	0.0	16.0	0.0	0.0	19.0	0.0	15.0	30.0	34.0	88.0	15.0	14.0	0.0	19.0	0.0	0.0	0.0	0.0	25.0	103.0	21.0	12.0	23.0	17.0	0.0	22.0	0.0	87.0	0.0
OTU 210	0.0	0.0	13.0	20.0	26.0	0.0	16.0	0.0	23.0	23.0	23.0	97.0	26.0	34.0	0.0	0.0	0.0	0.0	0.0	57.0	32.0	12.0	44.0	28.0	0.0	28.0	20.0	28.0	25.0	0.0	0.0
OTU 211	0.0	0.0	0.0	16.0	0.0	0.0	37.0	0.0	0.0	20.0	0.0	16.0	0.0	0.0	33.0	19.0	0.0	0.0	0.0	91.0	25.0	61.0	71.0	0.0	0.0	29.0	12.0	37.0	0.0	67.0	41.0
OTU 212	0.0	0.0	0.0	0.0	0.0	38.0	36.0	58.0	32.0	0.0	34.0	0.0	0.0	0.0	14.0	0.0	0.0	0.0	81.0	25.0	17.0	33.0	0.0	10.0	0.0	61.0	20.0	66.0	0.0	0.0	50.0
OTU 213	0.0	0.0	107.0	79.0	0.0	0.0	0.0	0.0	0.0	64.0	0.0	0.0	0.0	0.0	18.0	0.0	0.0	0.0	0.0	0.0	0.0	0.0	0.0	0.0	0.0	0.0	85.0	0.0	0.0	0.0	216.0
OTU 214	38.0	0.0	18.0	16.0	41.0	14.0	27.0	0.0	59.0	0.0	15.0	0.0	58.0	0.0	0.0	18.0	15.0	16.0	0.0	0.0	50.0	77.0	26.0	0.0	20.0	21.0	0.0	18.0	19.0	0.0	0.0
OTU 215	0.0	0.0	0.0	25.0	14.0	0.0	14.0	0.0	39.0	19.0	28.0	22.0	17.0	13.0	0.0	23.0	0.0	0.0	22.0	24.0	18.0	23.0	28.0	18.0	40.0	34.0	0.0	29.0	0.0	116.0	0.0
OTU 216	20.0	14.0	0.0	42.0	19.0	26.0	0.0	38.0	36.0	44.0	0.0	0.0	19.0	24.0	0.0	17.0	66.0	0.0	0.0	27.0	0.0	34.0	23.0	27.0	29.0	39.0	0.0	0.0	0.0	21.0	0.0
OTU 217	0.0	0.0	0.0	33.0	12.0	43.0	0.0	0.0	60.0	13.0	0.0	29.0	36.0	30.0	0.0	29.0	7.0	12.0	28.0	22.0	0.0	0.0	0.0	32.0	22.0	35.0	57.0	36.0	29.0	0.0	0.0
OTU 218	0.0	0.0	0.0	0.0	0.0	0.0	0.0	125.0	68.0	0.0	0.0	0.0	0.0	0.0	46.0	0.0	0.0	0.0	0.0	58.0	0.0	74.0	65.0	0.0	0.0	0.0	79.0	0.0	0.0	23.0	27.0
OTU 219	0.0	0.0	14.0	31.0	33.0	30.0	12.0	49.0	24.0	22.0	23.0	77.0	0.0	30.0	0.0	0.0	0.0	0.0	10.0	0.0	26.0	24.0	44.0	20.0	0.0	28.0	24.0	33.0	10.0	0.0	0.0
OTU 220	52.0	14.0	0.0	20.0	50.0	30.0	10.0	11.0	24.0	11.0	7.0	5.0	45.0	13.0	0.0	13.0	14.0	12.0	0.0	19.0	16.0	14.0	5.0	15.0	27.0	38.0	29.0	19.0	50.0	0.0	0.0
OTU 221	0.0	0.0	0.0	0.0	6.0	0.0	44.0	44.0	27.0	2.0	23.0	14.0	0.0	4.0	10.0	0.0	0.0	0.0	0.0	81.0	31.0	56.0	9.0	30.0	0.0	57.0	5.0	48.0	0.0	17.0	55.0
OTU 222	0.0	0.0	0.0	28.0	32.0	0.0	40.0	52.0	38.0	0.0	31.0	24.0	0.0	20.0	0.0	23.0	0.0	0.0	0.0	11.0	14.0	60.0	0.0	46.0	0.0	50.0	31.0	31.0	0.0	21.0	10.0
OTU 223	15.0	132.0	0.0	0.0	41.0	0.0	28.0	0.0	21.0	0.0	21.0	34.0	33.0	31.0	0.0	12.0	0.0	0.0	0.0	0.0	21.0	38.0	0.0	20.0	20.0	16.0	20.0	20.0	37.0	0.0	0.0
OTU 224	0.0	0.0	0.0	17.0	0.0	11.0	0.0	16.0	6.0	18.0	4.0	20.0	13.0	29.0	0.0	16.0	83.0	62.0	0.0	26.0	29.0	0.0	15.0	49.0	0.0	60.0	0.0	78.0	0.0	6.0	0.0
OTU 225	64.0	26.0	0.0	15.0	15.0	20.0	12.0	3.0	16.0	11.0	0.0	0.0	58.0	10.0	0.0	22.0	22.0	18.0	0.0	27.0	13.0	14.0	33.0	16.0	48.0	36.0	9.0	46.0	0.0	0.0	0.0
OTU 226	10.0	0.0	0.0	19.0	27.0	12.0	11.0	0.0	22.0	23.0	38.0	51.0	58.0	0.0	0.0	16.0	46.0	63.0	42.0	0.0	0.0	19.0	0.0	26.0	22.0	29.0	0.0	18.0	0.0	0.0	0.0
OTU 227	0.0	0.0	0.0	25.0	25.0	12.0	0.0	0.0	23.0	30.0	0.0	19.0	16.0	40.0	0.0	0.0	0.0	0.0	0.0	65.0	20.0	11.0	21.0	16.0	23.0	27.0	56.0	26.0	76.0	21.0	0.0
OTU 228	0.0	0.0	0.0	0.0	29.0	0.0	34.0	0.0	0.0	0.0	25.0	0.0	0.0	13.0	0.0	0.0	0.0	0.0	0.0	0.0	0.0	0.0	0.0	0.0	0.0	150.0	70.0	171.0	50.0	10.0	0.0
OTU 229	0.0	0.0	58.0	15.0	0.0	13.0	22.0	37.0	19.0	0.0	10.0	27.0	13.0	0.0	91.0	10.0	0.0	0.0	0.0	27.0	55.0	0.0	0.0	10.0	29.0	34.0	0.0	20.0	0.0	0.0	61.0
OTU 230	0.0	0.0	0.0	0.0	17.0	0.0	41.0	0.0	24.0	67.0	46.0	0.0	0.0	0.0	0.0	14.0	0.0	0.0	0.0	0.0	23.0	61.0	30.0	0.0	117.0	20.0	40.0	25.0	0.0	25.0	0.0
OTU 231	22.0	14.0	0.0	0.0	0.0	66.0	27.0	54.0	23.0	25.0	16.0	0.0	9.0	18.0	0.0	0.0	49.0	53.0	0.0	24.0	0.0	0.0	29.0	25.0	21.0	33.0	13.0	26.0	0.0	0.0	0.0
OTU 232	0.0	0.0	0.0	0.0	24.0	0.0	41.0	0.0	0.0	0.0	15.0	0.0	0.0	10.0	0.0	0.0	0.0	0.0	0.0	0.0	0.0	0.0	0.0	0.0	0.0	167.0	102.0	182.0	0.0	5.0	0.0
OTU 233	34.0	24.0	0.0	20.0	16.0	19.0	0.0	0.0	34.0	0.0	104.0	68.0	32.0	0.0	0.0	13.0	0.0	0.0	0.0	14.0	60.0	0.0	18.0	31.0	24.0	0.0	0.0	0.0	0.0	33.0	0.0
OTU 234	55.0	0.0	0.0	0.0	0.0	25.0	52.0	14.0	20.0	11.0	0.0	0.0	12.0	0.0	0.0	5.0	9.0	18.0	0.0	22.0	0.0	7.0	2.0	19.0	21.0	120.0	48.0	38.0	45.0	0.0	0.0
OTU 235	0.0	0.0	0.0	10.0	63.0	0.0	130.0	38.0	32.0	0.0	69.0	13.0	0.0	0.0	0.0	0.0	0.0	0.0	18.0	8.0	0.0	23.0	0.0	0.0	0.0	85.0	0.0	54.0	0.0	0.0	0.0
OTU 236	0.0	0.0	16.0	32.0	47.0	0.0	29.0	23.0	5.0	9.0	16.0	41.0	0.0	25.0	0.0	0.0	0.0	0.0	43.0	0.0	19.0	9.0	21.0	24.0	0.0	49.0	24.0	85.0	23.0	0.0	0.0
OTU 237	14.0	5.0	0.0	29.0	40.0	25.0	9.0	12.0	30.0	18.0	1.0	13.0	75.0	20.0	7.0	27.0	25.0	30.0	0.0	26.0	14.0	22.0	23.0	19.0	25.0	9.0	0.0	20.0	0.0	0.0	0.0
OTU 238	19.0	0.0	0.0	42.0	0.0	48.0	0.0	15.0	0.0	12.0	0.0	21.0	9.0	0.0	55.0	24.0	19.0	24.0	0.0	27.0	70.0	14.0	43.0	10.0	19.0	35.0	0.0	30.0	0.0	0.0	0.0
OTU 239	14.0	0.0	0.0	37.0	30.0	16.0	26.0	0.0	20.0	13.0	20.0	0.0	0.0	17.0	0.0	19.0	59.0	74.0	23.0	0.0	0.0	19.0	0.0	29.0	37.0	42.0	0.0	40.0	0.0	0.0	0.0
OTU 240	4.0	0.0	5.0	41.0	27.0	19.0	0.0	0.0	29.0	20.0	0.0	26.0	0.0	19.0	15.0	22.0	0.0	0.0	10.0	0.0	38.0	13.0	50.0	34.0	72.0	33.0	12.0	19.0	0.0	26.0	0.0
OTU 241	0.0	34.0	0.0	27.0	33.0	39.0	20.0	0.0	17.0	0.0	9.0	26.0	0.0	14.0	65.0	16.0	0.0	0.0	0.0	46.0	24.0	42.0	0.0	29.0	33.0	12.0	15.0	13.0	0.0	17.0	0.0
OTU 242	66.0	0.0	0.0	9.0	28.0	18.0	11.0	14.0	17.0	47.0	0.0	8.0	0.0	0.0	15.0	12.0	0.0	0.0	0.0	0.0	7.0	22.0	0.0	18.0	18.0	31.0	0.0	47.0	87.0	0.0	45.0
OTU 243	0.0	0.0	36.0	0.0	26.0	0.0	0.0	0.0	0.0	12.0	0.0	15.0	0.0	0.0	10.0	0.0	0.0	0.0	0.0	0.0	15.0	0.0	0.0	0.0	4.0	64.0	17.0	0.0	0.0	0.0	317.0
OTU 244	0.0	0.0	0.0	5.0	38.0	0.0	66.0	0.0	4.0	0.0	39.0	10.0	0.0	17.0	0.0	14.0	0.0	0.0	87.0	0.0	9.0	4.0	0.0	0.0	0.0	27.0	41.0	21.0	122.0	10.0	0.0
OTU 245	0.0	0.0	67.0	0.0	24.0	0.0	0.0	0.0	0.0	0.0	0.0	88.0	0.0	91.0	16.0	0.0	0.0	0.0	0.0	0.0	9.0	0.0	0.0	0.0	28.0	23.0	25.0	42.0	0.0	13.0	86.0
OTU 246	18.0	4.0	0.0	16.0	14.0	40.0	0.0	12.0	23.0	16.0	8.0	9.0	100.0	9.0	9.0	24.0	36.0	26.0	0.0	18.0	11.0	21.0	7.0	14.0	29.0	16.0	2.0	14.0	0.0	11.0	0.0
OTU 247	0.0	0.0	0.0	17.0	0.0	0.0	0.0	0.0	0.0	29.0	54.0	11.0	0.0	0.0	50.0	24.0	0.0	0.0	0.0	88.0	30.0	36.0	0.0	0.0	0.0	21.0	30.0	28.0	0.0	70.0	19.0
OTU 248	0.0	0.0	76.0	138.0	0.0	0.0	0.0	0.0	0.0	100.0	0.0	0.0	0.0	0.0	26.0	0.0	0.0	0.0	0.0	0.0	0.0	0.0	0.0	0.0	0.0	0.0	54.0	0.0	0.0	0.0	112.0
OTU 249	0.0	0.0	63.0	32.0	0.0	15.0	26.0	27.0	0.0	0.0	13.0	0.0	18.0	0.0	35.0	0.0	0.0	0.0	0.0	0.0	0.0	0.0	11.0	52.0	16.0	26.0	16.0	80.0	59.0	0.0	17.0
OTU 250	0.0	0.0	44.0	0.0	29.0	0.0	0.0	0.0	0.0	18.0	0.0	26.0	0.0	0.0	14.0	0.0	0.0	0.0	0.0	0.0	28.0	0.0	0.0	0.0	21.0	42.0	17.0	69.0	0.0	0.0	197.0
OTU 251	71.0	0.0	0.0	11.0	26.0	20.0	0.0	24.0	12.0	10.0	17.0	11.0	18.0	19.0	0.0	40.0	0.0	8.0	0.0	0.0	0.0	36.0	7.0	6.0	0.0	21.0	0.0	51.0	95.0	0.0	0.0
OTU 252	0.0	0.0	0.0	0.0	0.0	0.0	39.0	0.0	0.0	0.0	33.0	0.0	0.0	19.0	0.0	0.0	0.0	0.0	60.0	0.0	0.0	0.0	0.0	0.0	0.0	128.0	68.0	140.0	0.0	16.0	0.0
OTU 253	25.0	33.0	0.0	30.0	0.0	45.0	27.0	17.0	13.0	12.0	21.0	10.0	20.0	0.0	0.0	38.0	29.0	31.0	20.0	0.0	0.0	0.0	0.0	0.0	17.0	5.0	0.0	41.0	0.0	23.0	43.0
OTU 254	0.0	46.0	0.0	21.0	33.0	0.0	21.0	0.0	18.0	9.0	10.0	20.0	12.0	7.0	0.0	15.0	0.0	0.0	13.0	6.0	20.0	14.0	26.0	20.0	32.0	42.0	0.0	30.0	0.0	0.0	85.0
OTU 255	0.0	0.0	0.0	4.0	0.0	9.0	0.0	16.0	10.0	24.0	17.0	0.0	18.0	17.0	0.0	0.0	71.0	86.0	0.0	35.0	30.0	25.0	20.0	0.0	0.0	46.0	0.0	71.0	0.0	0.0	0.0
OTU 256	0.0	0.0	42.0	0.0	23.0	0.0	0.0	0.0	0.0	0.0	0.0	56.0	0.0	33.0	20.0	0.0	0.0	0.0	0.0	0.0	5.0	0.0	0.0	0.0	28.0	47.0	39.0	45.0	0.0	15.0	144.0
OTU 257	27.0	15.0	6.0	9.0	0.0	27.0	21.0	0.0	15.0	43.0	10.0	11.0	39.0	35.0	0.0	10.0	15.0	10.0	0.0	0.0	14.0	12.0	24.0	15.0	15.0	57.0	19.0	40.0	0.0	7.0	0.0
OTU 258	0.0	0.0	0.0	10.0	21.0	0.0	86.0	0.0	0.0	0.0	0.0	12.0	0.0	4.0	0.0	10.0	0.0	0.0	0.0	87.0	6.0	0.0	24.0	15.0	0.0	15.0	61.0	26.0	109.0	10.0	0.0
OTU 259	0.0	0.0	0.0	0.0	38.0	0.0	33.0	16.0	22.0	0.0	26.0	20.0	0.0	29.0	12.0	0.0	0.0	0.0	0.0	22.0	27.0	50.0	34.0	0.0	0.0	39.0	37.0	35.0	0.0	28.0	28.0
OTU 260	13.0	0.0	27.0	0.0	31.0	0.0	10.0	0.0	0.0	40.0	17.0	0.0	34.0	0.0	0.0	18.0	14.0	15.0	0.0	0.0	45.0	62.0	48.0	0.0	12.0	36.0	0.0	35.0	38.0	0.0	0.0
OTU 261	0.0	0.0	88.0	13.0	19.0	32.0	12.0	12.0	26.0	42.0	27.0	19.0	0.0	0.0	15.0	11.0	0.0	0.0	0.0	10.0	15.0	17.0	0.0	12.0	17.0	26.0	37.0	45.0	0.0	0.0	0.0
OTU 262	0.0	0.0	0.0	0.0	0.0	0.0	23.0	58.0	0.0	26.0	28.0	0.0	0.0	0.0	33.0	0.0	0.0	0.0	0.0	18.0	0.0	21.0	0.0	137.0	0.0	37.0	85.0	26.0	0.0	0.0	0.0
OTU 263	0.0	0.0	0.0	7.0	0.0	0.0	112.0	20.0	0.0	0.0	55.0	9.0	0.0	0.0	0.0	0.0	0.0	0.0	11.0	0.0	0.0	33.0	0.0	0.0	0.0	68.0	0.0	64.0	112.0	0.0	0.0
OTU 264	0.0	0.0	0.0	38.0	26.0	36.0	0.0	0.0	0.0	23.0	0.0	0.0	0.0	0.0	93.0	19.0	45.0	26.0	0.0	33.0	23.0	51.0	29.0	16.0	32.0	0.0	0.0	0.0	0.0	0.0	0.0
OTU 265	0.0	0.0	0.0	0.0	32.0	21.0	0.0	0.0	99.0	27.0	0.0	0.0	0.0	0.0	0.0	17.0	31.0	26.0	0.0	16.0	23.0	0.0	28.0	17.0	29.0	0.0	0.0	30.0	0.0	94.0	0.0
OTU 266	0.0	0.0	0.0	13.0	22.0	21.0	18.0	17.0	49.0	13.0	39.0	18.0	25.0	11.0	0.0	8.0	0.0	8.0	0.0	10.0	0.0	33.0	72.0	32.0	0.0	37.0	0.0	42.0	0.0	0.0	0.0
OTU 267	34.0	0.0	0.0	0.0	0.0	59.0	0.0	13.0	40.0	1.0	0.0	0.0	15.0	0.0	0.0	14.0	19.0	19.0	0.0	20.0	0.0	13.0	21.0	12.0	20.0	55.0	67.0	29.0	36.0	0.0	0.0
OTU 268	0.0	0.0	0.0	14.0	0.0	0.0	56.0	0.0	0.0	25.0	0.0	18.0	0.0	0.0	30.0	10.0	0.0	0.0	0.0	64.0	18.0	39.0	0.0	0.0	0.0	52.0	21.0	47.0	0.0	41.0	50.0
OTU 269	48.0	109.0	37.0	0.0	22.0	0.0	24.0	0.0	0.0	11.0	15.0	0.0	35.0	0.0	0.0	8.0	10.0	5.0	0.0	0.0	0.0	0.0	14.0	0.0	7.0	37.0	0.0	33.0	68.0	0.0	0.0
OTU 270	5.0	0.0	0.0	0.0	0.0	27.0	53.0	0.0	25.0	12.0	0.0	22.0	0.0	30.0	0.0	0.0	0.0	0.0	0.0	0.0	79.0	90.0	36.0	21.0	20.0	22.0	0.0	22.0	0.0	18.0	0.0
OTU 271	0.0	0.0	0.0	14.0	0.0	0.0	0.0	0.0	0.0	26.0	0.0	26.0	0.0	0.0	50.0	15.0	0.0	0.0	25.0	72.0	31.0	51.0	0.0	0.0	0.0	28.0	11.0	32.0	0.0	78.0	23.0
OTU 272	0.0	0.0	0.0	0.0	26.0	0.0	21.0	0.0	0.0	5.0	0.0	43.0	0.0	0.0	12.0	0.0	0.0	0.0	0.0	0.0	0.0	0.0	0.0	0.0	17.0	45.0	32.0	47.0	96.0	13.0	118.0
OTU 273	0.0	0.0	0.0	38.0	28.0	27.0	0.0	93.0	0.0	12.0	37.0	0.0	0.0	0.0	0.0	23.0	20.0	23.0	0.0	22.0	22.0	55.0	16.0	22.0	14.0	22.0	0.0	0.0	0.0	0.0	0.0
OTU 274	0.0	0.0	0.0	0.0	0.0	48.0	51.0	0.0	7.0	18.0	0.0	71.0	0.0	54.0	0.0	0.0	0.0	0.0	0.0	31.0	0.0	12.0	0.0	66.0	20.0	18.0	53.0	25.0	0.0	0.0	0.0
OTU 275	27.0	6.0	7.0	12.0	0.0	40.0	8.0	0.0	29.0	35.0	13.0	15.0	44.0	20.0	0.0	8.0	17.0	18.0	0.0	0.0	7.0	11.0	28.0	14.0	13.0	38.0	9.0	41.0	0.0	13.0	0.0
OTU 276	0.0	0.0	108.0	22.0	19.0	0.0	42.0	0.0	20.0	10.0	0.0	16.0	15.0	8.0	0.0	23.0	0.0	0.0	0.0	34.0	19.0	23.0	18.0	14.0	30.0	25.0	0.0	27.0	0.0	0.0	0.0
OTU 277	0.0	0.0	0.0	38.0	0.0	17.0	11.0	33.0	0.0	0.0	17.0	69.0	18.0	91.0	39.0	0.0	0.0	0.0	0.0	0.0	0.0	0.0	21.0	50.0	18.0	11.0	25.0	0.0	0.0	0.0	15.0
OTU 278	0.0	0.0	0.0	20.0	12.0	0.0	11.0	64.0	28.0	34.0	24.0	19.0	20.0	7.0	0.0	23.0	0.0	0.0	19.0	12.0	18.0	32.0	30.0	24.0	27.0	23.0	0.0	26.0	0.0	0.0	0.0
OTU 279	0.0	0.0	0.0	11.0	18.0	0.0	95.0	0.0	13.0	14.0	0.0	15.0	8.0	0.0	0.0	0.0	0.0	0.0	110.0	4.0	14.0	15.0	7.0	13.0	11.0	29.0	0.0	17.0	0.0	8.0	71.0
OTU 280	88.0	36.0	0.0	0.0	0.0	38.0	16.0	0.0	14.0	13.0	11.0	0.0	7.0	13.0	0.0	0.0	24.0	22.0	0.0	14.0	38.0	0.0	27.0	34.0	5.0	43.0	0.0	28.0	0.0	0.0	0.0
OTU 281	34.0	0.0	0.0	38.0	0.0	37.0	46.0	0.0	14.0	0.0	33.0	0.0	0.0	84.0	0.0	0.0	0.0	0.0	0.0	0.0	15.0	0.0	22.0	0.0	22.0	47.0	49.0	0.0	0.0	0.0	28.0
OTU 282	0.0	0.0	0.0	0.0	0.0	0.0	34.0	19.0	37.0	0.0	36.0	24.0	0.0	27.0	18.0	0.0	0.0	0.0	0.0	25.0	32.0	58.0	33.0	0.0	0.0	24.0	14.0	36.0	0.0	27.0	25.0
OTU 283	29.0	183.0	61.0	0.0	52.0	0.0	57.0	0.0	0.0	0.0	51.0	0.0	33.0	0.0	0.0	0.0	0.0	0.0	0.0	0.0	0.0	0.0	0.0	0.0	0.0	0.0	0.0	0.0	0.0	0.0	0.0
OTU 284	0.0	0.0	187.0	0.0	0.0	0.0	0.0	0.0	0.0	0.0	0.0	0.0	0.0	0.0	0.0	0.0	0.0	0.0	0.0	0.0	0.0	0.0	0.0	0.0	0.0	0.0	278.0	0.0	0.0	0.0	0.0
OTU 285	7.0	0.0	0.0	0.0	0.0	25.0	54.0	0.0	5.0	18.0	0.0	0.0	0.0	31.0	114.0	0.0	0.0	0.0	0.0	0.0	0.0	10.0	0.0	50.0	9.0	23.0	72.0	44.0	0.0	0.0	0.0
OTU 286	0.0	20.0	0.0	0.0	13.0	0.0	0.0	0.0	0.0	10.0	0.0	33.0	0.0	88.0	16.0	0.0	0.0	0.0	0.0	0.0	19.0	0.0	0.0	0.0	9.0	43.0	18.0	0.0	0.0	0.0	193.0
OTU 287	0.0	0.0	0.0	0.0	9.0	21.0	28.0	0.0	0.0	0.0	24.0	30.0	0.0	0.0	128.0	72.0	0.0	0.0	0.0	0.0	0.0	0.0	0.0	0.0	49.0	18.0	0.0	19.0	0.0	61.0	0.0
OTU 288	65.0	0.0	0.0	13.0	16.0	0.0	20.0	0.0	20.0	11.0	0.0	15.0	10.0	9.0	0.0	10.0	0.0	0.0	0.0	16.0	10.0	13.0	14.0	10.0	32.0	52.0	0.0	18.0	104.0	0.0	0.0
OTU 289	19.0	102.0	0.0	0.0	0.0	0.0	60.0	0.0	0.0	0.0	0.0	0.0	0.0	0.0	0.0	0.0	0.0	0.0	0.0	0.0	14.0	0.0	0.0	36.0	0.0	84.0	133.0	0.0	0.0	10.0	0.0
OTU 290	0.0	0.0	108.0	0.0	0.0	0.0	33.0	23.0	18.0	0.0	25.0	12.0	0.0	30.0	10.0	9.0	0.0	0.0	0.0	14.0	18.0	39.0	18.0	12.0	0.0	27.0	9.0	14.0	0.0	16.0	23.0
OTU 291	28.0	0.0	0.0	49.0	0.0	33.0	0.0	0.0	0.0	7.0	0.0	0.0	59.0	16.0	0.0	53.0	16.0	9.0	16.0	68.0	28.0	0.0	0.0	0.0	28.0	0.0	22.0	0.0	0.0	25.0	0.0
OTU 292	0.0	0.0	0.0	10.0	20.0	20.0	0.0	13.0	18.0	43.0	0.0	24.0	0.0	62.0	0.0	15.0	0.0	0.0	26.0	0.0	16.0	17.0	39.0	10.0	10.0	23.0	0.0	21.0	0.0	70.0	0.0
OTU 293	23.0	0.0	96.0	23.0	30.0	13.0	0.0	0.0	30.0	23.0	0.0	0.0	20.0	15.0	0.0	7.0	0.0	53.0	0.0	28.0	0.0	0.0	19.0	27.0	24.0	11.0	0.0	0.0	0.0	14.0	0.0
OTU 294	0.0	0.0	0.0	0.0	16.0	0.0	60.0	0.0	12.0	0.0	41.0	0.0	0.0	21.0	0.0	7.0	0.0	0.0	0.0	0.0	16.0	0.0	21.0	32.0	0.0	54.0	56.0	62.0	0.0	14.0	40.0
OTU 295	24.0	38.0	0.0	0.0	0.0	96.0	0.0	0.0	0.0	0.0	0.0	0.0	20.0	0.0	0.0	14.0	0.0	10.0	0.0	7.0	0.0	9.0	37.0	0.0	20.0	23.0	0.0	24.0	44.0	85.0	0.0
OTU 296	33.0	0.0	0.0	37.0	0.0	27.0	23.0	0.0	0.0	14.0	0.0	0.0	76.0	25.0	0.0	61.0	21.0	19.0	20.0	0.0	7.0	0.0	0.0	0.0	31.0	0.0	38.0	0.0	0.0	16.0	0.0
OTU 297	27.0	0.0	0.0	0.0	0.0	34.0	0.0	19.0	0.0	15.0	0.0	23.0	15.0	6.0	0.0	15.0	28.0	21.0	0.0	19.0	31.0	24.0	50.0	15.0	21.0	34.0	0.0	31.0	20.0	0.0	0.0
OTU 298	26.0	9.0	0.0	12.0	28.0	42.0	22.0	0.0	22.0	10.0	15.0	8.0	47.0	22.0	0.0	19.0	21.0	26.0	0.0	5.0	0.0	0.0	22.0	58.0	25.0	0.0	0.0	0.0	9.0	0.0	0.0
OTU 299	0.0	0.0	0.0	0.0	36.0	0.0	43.0	18.0	18.0	0.0	20.0	21.0	0.0	20.0	5.0	0.0	0.0	0.0	0.0	11.0	28.0	23.0	4.0	0.0	0.0	63.0	22.0	42.0	0.0	21.0	49.0
OTU 300	0.0	0.0	0.0	46.0	22.0	0.0	60.0	0.0	22.0	0.0	0.0	0.0	25.0	0.0	0.0	0.0	9.0	6.0	0.0	43.0	26.0	0.0	0.0	0.0	17.0	36.0	0.0	18.0	0.0	112.0	0.0
OTU 301	0.0	0.0	0.0	16.0	0.0	0.0	90.0	32.0	0.0	0.0	100.0	15.0	0.0	47.0	0.0	0.0	0.0	0.0	13.0	15.0	0.0	41.0	0.0	0.0	0.0	35.0	0.0	38.0	0.0	0.0	0.0
OTU 302	0.0	0.0	0.0	0.0	0.0	0.0	0.0	105.0	77.0	0.0	0.0	0.0	0.0	0.0	36.0	0.0	0.0	0.0	0.0	38.0	57.0	63.0	0.0	0.0	0.0	0.0	27.0	0.0	0.0	20.0	19.0
OTU 303	15.0	0.0	56.0	6.0	21.0	30.0	16.0	0.0	16.0	23.0	15.0	12.0	30.0	7.0	0.0	15.0	16.0	12.0	0.0	14.0	0.0	23.0	16.0	45.0	28.0	0.0	0.0	14.0	11.0	0.0	0.0
OTU 304	0.0	0.0	0.0	0.0	0.0	0.0	0.0	0.0	0.0	440.0	0.0	0.0	0.0	0.0	0.0	0.0	0.0	0.0	0.0	0.0	0.0	0.0	0.0	0.0	0.0	0.0	0.0	0.0	0.0	0.0	0.0
OTU 305	0.0	45.0	37.0	0.0	10.0	6.0	26.0	0.0	0.0	0.0	5.0	8.0	0.0	0.0	0.0	0.0	0.0	0.0	0.0	0.0	0.0	0.0	0.0	0.0	0.0	36.0	106.0	28.0	130.0	0.0	0.0
OTU 306	0.0	0.0	0.0	20.0	25.0	23.0	0.0	0.0	0.0	19.0	0.0	0.0	0.0	114.0	0.0	31.0	27.0	37.0	0.0	13.0	32.0	0.0	16.0	19.0	38.0	0.0	0.0	21.0	0.0	0.0	0.0
OTU 307	0.0	0.0	0.0	10.0	0.0	5.0	27.0	17.0	18.0	0.0	17.0	42.0	24.0	0.0	0.0	13.0	0.0	0.0	31.0	23.0	0.0	0.0	0.0	15.0	8.0	49.0	104.0	32.0	0.0	0.0	0.0
OTU 308	0.0	0.0	0.0	0.0	0.0	0.0	0.0	0.0	31.0	41.0	0.0	58.0	9.0	0.0	91.0	15.0	0.0	0.0	0.0	0.0	0.0	0.0	0.0	61.0	28.0	20.0	81.0	0.0	0.0	0.0	0.0
OTU 309	0.0	0.0	0.0	15.0	18.0	0.0	0.0	0.0	0.0	0.0	48.0	23.0	82.0	24.0	0.0	0.0	0.0	0.0	67.0	0.0	11.0	35.0	31.0	0.0	26.0	17.0	0.0	0.0	0.0	9.0	28.0
OTU 310	0.0	0.0	0.0	10.0	24.0	0.0	0.0	80.0	17.0	11.0	96.0	15.0	0.0	0.0	0.0	0.0	0.0	0.0	0.0	0.0	42.0	26.0	18.0	18.0	29.0	27.0	0.0	18.0	0.0	0.0	0.0
OTU 311	0.0	0.0	0.0	23.0	31.0	22.0	0.0	0.0	0.0	12.0	95.0	0.0	0.0	0.0	0.0	5.0	30.0	16.0	0.0	20.0	20.0	33.0	6.0	24.0	21.0	72.0	0.0	0.0	0.0	0.0	0.0
OTU 312	0.0	0.0	0.0	18.0	15.0	34.0	0.0	0.0	27.0	0.0	63.0	15.0	19.0	0.0	0.0	20.0	0.0	0.0	28.0	15.0	12.0	20.0	24.0	32.0	32.0	27.0	14.0	15.0	0.0	0.0	0.0
OTU 313	0.0	0.0	0.0	8.0	17.0	31.0	0.0	0.0	0.0	18.0	0.0	83.0	0.0	68.0	0.0	20.0	28.0	38.0	0.0	12.0	31.0	0.0	30.0	21.0	24.0	0.0	0.0	0.0	0.0	0.0	0.0
OTU 314	0.0	0.0	62.0	30.0	0.0	0.0	0.0	0.0	0.0	20.0	0.0	0.0	0.0	0.0	190.0	0.0	0.0	0.0	38.0	0.0	0.0	0.0	0.0	9.0	0.0	0.0	0.0	0.0	0.0	0.0	77.0
OTU 315	0.0	0.0	0.0	50.0	12.0	0.0	40.0	0.0	16.0	0.0	49.0	0.0	0.0	10.0	0.0	25.0	0.0	0.0	0.0	0.0	15.0	0.0	37.0	52.0	0.0	29.0	36.0	27.0	0.0	28.0	0.0
OTU 316	25.0	0.0	0.0	39.0	18.0	5.0	0.0	0.0	15.0	0.0	0.0	0.0	0.0	0.0	0.0	0.0	0.0	0.0	19.0	0.0	28.0	12.0	0.0	9.0	32.0	180.0	0.0	43.0	0.0	0.0	0.0
OTU 317	0.0	0.0	0.0	0.0	20.0	0.0	0.0	0.0	0.0	8.0	0.0	21.0	0.0	0.0	5.0	0.0	0.0	0.0	0.0	0.0	23.0	0.0	0.0	0.0	16.0	0.0	17.0	0.0	34.0	0.0	275.0
OTU 318	23.0	0.0	0.0	49.0	40.0	13.0	20.0	53.0	18.0	0.0	0.0	47.0	41.0	0.0	0.0	17.0	0.0	0.0	15.0	0.0	0.0	23.0	35.0	21.0	0.0	0.0	0.0	0.0	0.0	0.0	0.0
OTU 319	0.0	0.0	0.0	9.0	28.0	0.0	42.0	0.0	36.0	0.0	39.0	27.0	0.0	0.0	83.0	14.0	0.0	0.0	0.0	12.0	17.0	14.0	0.0	0.0	0.0	0.0	41.0	32.0	0.0	21.0	0.0
OTU 320	19.0	0.0	0.0	0.0	103.0	4.0	49.0	0.0	6.0	8.0	0.0	0.0	0.0	0.0	87.0	0.0	0.0	0.0	0.0	0.0	18.0	0.0	17.0	10.0	31.0	18.0	0.0	32.0	0.0	12.0	0.0
OTU 321	16.0	0.0	0.0	24.0	17.0	16.0	32.0	17.0	10.0	0.0	16.0	16.0	10.0	10.0	26.0	21.0	0.0	0.0	0.0	0.0	0.0	15.0	0.0	57.0	6.0	30.0	23.0	37.0	0.0	15.0	0.0
OTU 322	0.0	0.0	0.0	13.0	30.0	0.0	42.0	0.0	29.0	35.0	59.0	18.0	0.0	0.0	0.0	22.0	0.0	0.0	0.0	10.0	13.0	21.0	65.0	0.0	0.0	0.0	34.0	0.0	0.0	21.0	0.0
OTU 323	10.0	0.0	0.0	71.0	0.0	0.0	0.0	0.0	19.0	13.0	31.0	41.0	0.0	27.0	0.0	0.0	0.0	0.0	0.0	41.0	0.0	0.0	37.0	19.0	22.0	18.0	0.0	19.0	0.0	19.0	23.0
OTU 324	0.0	0.0	0.0	19.0	21.0	19.0	48.0	0.0	16.0	18.0	27.0	25.0	32.0	0.0	0.0	0.0	0.0	12.0	60.0	0.0	0.0	0.0	0.0	19.0	64.0	12.0	0.0	18.0	0.0	0.0	0.0
OTU 325	0.0	0.0	0.0	11.0	0.0	15.0	0.0	10.0	10.0	10.0	4.0	0.0	14.0	21.0	0.0	0.0	64.0	62.0	0.0	39.0	37.0	0.0	12.0	0.0	0.0	59.0	0.0	41.0	0.0	0.0	0.0
OTU 326	0.0	0.0	0.0	0.0	0.0	0.0	24.0	25.0	21.0	0.0	35.0	26.0	0.0	23.0	13.0	0.0	0.0	0.0	0.0	29.0	27.0	53.0	27.0	0.0	0.0	16.0	15.0	19.0	0.0	24.0	32.0
OTU 327	32.0	24.0	0.0	12.0	22.0	9.0	59.0	0.0	22.0	34.0	0.0	0.0	17.0	7.0	0.0	7.0	0.0	0.0	0.0	16.0	0.0	21.0	10.0	32.0	27.0	47.0	0.0	0.0	0.0	10.0	0.0
OTU 328	24.0	0.0	0.0	23.0	20.0	15.0	9.0	11.0	26.0	20.0	39.0	11.0	22.0	9.0	0.0	12.0	0.0	5.0	0.0	14.0	0.0	16.0	45.0	35.0	0.0	31.0	0.0	21.0	0.0	0.0	0.0
OTU 329	0.0	0.0	0.0	0.0	0.0	0.0	0.0	0.0	0.0	408.0	0.0	0.0	0.0	0.0	0.0	0.0	0.0	0.0	0.0	0.0	0.0	0.0	0.0	0.0	0.0	0.0	0.0	0.0	0.0	0.0	0.0
OTU 330	58.0	47.0	0.0	9.0	21.0	12.0	0.0	0.0	27.0	0.0	0.0	0.0	19.0	0.0	0.0	3.0	0.0	0.0	0.0	3.0	17.0	0.0	16.0	20.0	17.0	0.0	0.0	133.0	0.0	3.0	0.0
OTU 331	11.0	7.0	0.0	13.0	16.0	43.0	12.0	0.0	22.0	17.0	10.0	14.0	43.0	27.0	0.0	14.0	25.0	22.0	0.0	6.0	0.0	0.0	13.0	54.0	30.0	0.0	0.0	0.0	6.0	0.0	0.0
OTU 332	39.0	35.0	0.0	0.0	50.0	0.0	0.0	0.0	31.0	0.0	0.0	26.0	38.0	0.0	0.0	0.0	0.0	0.0	0.0	0.0	0.0	0.0	24.0	45.0	33.0	0.0	0.0	83.0	0.0	0.0	0.0
OTU 333	23.0	0.0	0.0	17.0	0.0	13.0	22.0	17.0	16.0	23.0	25.0	0.0	0.0	72.0	0.0	18.0	0.0	0.0	0.0	18.0	0.0	48.0	0.0	15.0	10.0	41.0	0.0	25.0	0.0	0.0	0.0
OTU 334	9.0	0.0	0.0	13.0	23.0	18.0	12.0	0.0	0.0	0.0	20.0	64.0	48.0	0.0	0.0	28.0	15.0	12.0	0.0	0.0	0.0	0.0	15.0	35.0	49.0	21.0	0.0	21.0	0.0	0.0	0.0
OTU 335	0.0	0.0	0.0	0.0	0.0	0.0	0.0	0.0	0.0	403.0	0.0	0.0	0.0	0.0	0.0	0.0	0.0	0.0	0.0	0.0	0.0	0.0	0.0	0.0	0.0	0.0	0.0	0.0	0.0	0.0	0.0
OTU 336	67.0	0.0	0.0	33.0	0.0	19.0	41.0	0.0	17.0	0.0	18.0	0.0	0.0	0.0	0.0	0.0	0.0	0.0	0.0	0.0	18.0	0.0	26.0	0.0	18.0	80.0	37.0	0.0	0.0	0.0	28.0
OTU 337	0.0	0.0	0.0	14.0	22.0	36.0	0.0	42.0	0.0	0.0	0.0	10.0	0.0	15.0	50.0	19.0	29.0	24.0	0.0	0.0	0.0	0.0	38.0	27.0	27.0	13.0	0.0	23.0	12.0	0.0	0.0
OTU 338	0.0	0.0	0.0	0.0	0.0	0.0	0.0	116.0	0.0	0.0	0.0	0.0	0.0	48.0	27.0	23.0	0.0	0.0	0.0	30.0	13.0	69.0	0.0	0.0	0.0	0.0	0.0	0.0	0.0	29.0	46.0
OTU 339	0.0	0.0	80.0	0.0	16.0	0.0	50.0	0.0	14.0	0.0	50.0	0.0	0.0	0.0	0.0	7.0	0.0	0.0	0.0	0.0	15.0	0.0	20.0	0.0	0.0	20.0	50.0	53.0	17.0	6.0	0.0
OTU 340	0.0	0.0	0.0	0.0	31.0	0.0	95.0	0.0	106.0	0.0	0.0	0.0	0.0	0.0	0.0	0.0	0.0	0.0	0.0	86.0	0.0	0.0	0.0	0.0	0.0	0.0	56.0	0.0	0.0	0.0	24.0
OTU 341	0.0	0.0	0.0	0.0	11.0	0.0	0.0	0.0	0.0	16.0	0.0	24.0	0.0	0.0	7.0	0.0	0.0	0.0	0.0	10.0	18.0	0.0	0.0	0.0	24.0	0.0	10.0	0.0	0.0	40.0	236.0
OTU 342	0.0	34.0	0.0	17.0	0.0	81.0	18.0	0.0	26.0	0.0	27.0	12.0	14.0	0.0	0.0	16.0	0.0	0.0	0.0	0.0	13.0	0.0	17.0	56.0	0.0	30.0	0.0	34.0	0.0	0.0	0.0
OTU 343	49.0	0.0	0.0	14.0	0.0	26.0	37.0	0.0	9.0	0.0	15.0	0.0	0.0	0.0	0.0	92.0	0.0	0.0	0.0	0.0	0.0	0.0	11.0	0.0	13.0	0.0	33.0	48.0	30.0	0.0	17.0
OTU 344	28.0	21.0	0.0	13.0	16.0	24.0	20.0	21.0	15.0	6.0	19.0	0.0	18.0	0.0	0.0	21.0	7.0	9.0	0.0	4.0	12.0	0.0	7.0	46.0	21.0	30.0	6.0	0.0	29.0	0.0	0.0
OTU 345	30.0	0.0	0.0	28.0	0.0	41.0	0.0	19.0	0.0	16.0	0.0	0.0	14.0	0.0	15.0	14.0	19.0	18.0	0.0	19.0	0.0	20.0	0.0	25.0	21.0	43.0	0.0	33.0	17.0	0.0	0.0
OTU 346	0.0	0.0	0.0	0.0	15.0	0.0	0.0	0.0	0.0	15.0	0.0	43.0	0.0	0.0	27.0	0.0	0.0	0.0	0.0	23.0	29.0	0.0	0.0	0.0	15.0	0.0	12.0	0.0	0.0	54.0	159.0
OTU 347	41.0	0.0	0.0	16.0	0.0	22.0	0.0	16.0	0.0	20.0	0.0	0.0	8.0	0.0	0.0	6.0	14.0	11.0	0.0	25.0	30.0	5.0	18.0	10.0	21.0	85.0	0.0	43.0	0.0	0.0	0.0
OTU 348	0.0	0.0	0.0	0.0	0.0	0.0	0.0	121.0	23.0	0.0	0.0	46.0	0.0	0.0	23.0	46.0	0.0	0.0	0.0	39.0	0.0	63.0	0.0	0.0	0.0	0.0	0.0	0.0	0.0	13.0	16.0
OTU 349	0.0	0.0	0.0	21.0	24.0	0.0	0.0	0.0	12.0	12.0	0.0	15.0	0.0	0.0	48.0	55.0	0.0	0.0	0.0	0.0	37.0	36.0	17.0	31.0	34.0	24.0	0.0	23.0	0.0	0.0	0.0
OTU 350	0.0	0.0	0.0	0.0	0.0	47.0	20.0	52.0	20.0	0.0	30.0	0.0	0.0	0.0	18.0	18.0	0.0	0.0	0.0	21.0	34.0	25.0	0.0	10.0	0.0	31.0	14.0	38.0	0.0	0.0	11.0
OTU 351	0.0	0.0	0.0	0.0	0.0	0.0	0.0	0.0	0.0	388.0	0.0	0.0	0.0	0.0	0.0	0.0	0.0	0.0	0.0	0.0	0.0	0.0	0.0	0.0	0.0	0.0	0.0	0.0	0.0	0.0	0.0
OTU 352	91.0	40.0	0.0	0.0	0.0	0.0	0.0	0.0	0.0	0.0	0.0	0.0	0.0	73.0	0.0	0.0	0.0	0.0	0.0	0.0	0.0	0.0	31.0	0.0	0.0	72.0	0.0	80.0	0.0	0.0	0.0
OTU 353	0.0	0.0	0.0	42.0	0.0	31.0	28.0	57.0	0.0	15.0	11.0	0.0	23.0	0.0	0.0	78.0	0.0	0.0	0.0	0.0	0.0	0.0	0.0	101.0	0.0	0.0	0.0	0.0	0.0	0.0	0.0
OTU 354	0.0	0.0	0.0	0.0	18.0	5.0	46.0	12.0	0.0	18.0	14.0	3.0	0.0	1.0	17.0	8.0	0.0	0.0	48.0	4.0	0.0	18.0	8.0	15.0	56.0	55.0	0.0	33.0	0.0	6.0	0.0
OTU 355	0.0	0.0	13.0	22.0	39.0	9.0	0.0	0.0	22.0	14.0	0.0	4.0	2.0	9.0	13.0	0.0	0.0	0.0	3.0	16.0	22.0	15.0	32.0	29.0	63.0	21.0	17.0	19.0	0.0	0.0	0.0
OTU 356	18.0	0.0	0.0	9.0	0.0	46.0	0.0	22.0	0.0	18.0	0.0	0.0	21.0	19.0	0.0	14.0	22.0	19.0	0.0	26.0	0.0	22.0	0.0	14.0	16.0	25.0	0.0	23.0	0.0	48.0	0.0
OTU 357	0.0	0.0	0.0	0.0	0.0	0.0	0.0	0.0	90.0	0.0	0.0	0.0	0.0	0.0	0.0	0.0	0.0	0.0	0.0	0.0	0.0	0.0	68.0	103.0	120.0	0.0	0.0	0.0	0.0	0.0	0.0
OTU 358	0.0	0.0	0.0	0.0	0.0	0.0	0.0	0.0	0.0	381.0	0.0	0.0	0.0	0.0	0.0	0.0	0.0	0.0	0.0	0.0	0.0	0.0	0.0	0.0	0.0	0.0	0.0	0.0	0.0	0.0	0.0
OTU 359	45.0	0.0	0.0	22.0	0.0	27.0	42.0	0.0	13.0	0.0	26.0	0.0	0.0	0.0	0.0	0.0	0.0	0.0	0.0	0.0	15.0	23.0	15.0	28.0	29.0	0.0	46.0	0.0	0.0	0.0	48.0
OTU 360	0.0	0.0	82.0	0.0	24.0	0.0	22.0	0.0	0.0	0.0	21.0	65.0	0.0	0.0	0.0	0.0	0.0	0.0	0.0	0.0	0.0	30.0	0.0	24.0	0.0	17.0	31.0	0.0	63.0	0.0	0.0
OTU 361	0.0	0.0	0.0	11.0	14.0	0.0	0.0	0.0	19.0	12.0	9.0	12.0	21.0	0.0	89.0	25.0	0.0	45.0	7.0	9.0	11.0	20.0	16.0	12.0	26.0	11.0	0.0	10.0	0.0	0.0	0.0
OTU 362	11.0	5.0	0.0	11.0	16.0	32.0	14.0	0.0	22.0	10.0	9.0	16.0	50.0	18.0	0.0	10.0	18.0	30.0	0.0	10.0	0.0	0.0	18.0	43.0	26.0	0.0	0.0	0.0	8.0	0.0	0.0
OTU 363	0.0	0.0	0.0	16.0	23.0	23.0	37.0	16.0	22.0	28.0	19.0	23.0	0.0	0.0	0.0	8.0	0.0	0.0	0.0	0.0	8.0	14.0	47.0	20.0	10.0	32.0	0.0	30.0	0.0	0.0	0.0
OTU 364	20.0	0.0	0.0	14.0	0.0	51.0	0.0	12.0	0.0	15.0	0.0	0.0	26.0	0.0	20.0	11.0	20.0	20.0	0.0	10.0	62.0	14.0	0.0	4.0	10.0	40.0	0.0	24.0	0.0	0.0	0.0
OTU 365	0.0	0.0	0.0	27.0	8.0	0.0	34.0	0.0	16.0	54.0	14.0	20.0	0.0	15.0	0.0	17.0	0.0	0.0	0.0	0.0	7.0	0.0	84.0	0.0	0.0	26.0	23.0	15.0	0.0	13.0	0.0
OTU 366	35.0	0.0	0.0	0.0	69.0	0.0	0.0	0.0	0.0	0.0	0.0	0.0	0.0	0.0	0.0	0.0	63.0	0.0	0.0	0.0	0.0	0.0	0.0	152.0	42.0	0.0	0.0	11.0	0.0	0.0	0.0
OTU 367	21.0	0.0	0.0	11.0	0.0	0.0	0.0	0.0	0.0	108.0	0.0	0.0	66.0	0.0	18.0	55.0	0.0	0.0	0.0	56.0	0.0	0.0	0.0	0.0	0.0	0.0	13.0	0.0	0.0	24.0	0.0
OTU 368	71.0	0.0	59.0	9.0	21.0	0.0	0.0	12.0	0.0	0.0	0.0	5.0	33.0	14.0	0.0	5.0	5.0	16.0	0.0	0.0	0.0	0.0	0.0	13.0	0.0	52.0	0.0	30.0	26.0	0.0	0.0
OTU 369	23.0	3.0	7.0	10.0	12.0	0.0	0.0	0.0	14.0	16.0	0.0	20.0	41.0	25.0	0.0	0.0	0.0	0.0	0.0	6.0	12.0	6.0	62.0	19.0	51.0	0.0	17.0	6.0	4.0	17.0	0.0
OTU 370	0.0	0.0	0.0	0.0	31.0	0.0	0.0	0.0	51.0	0.0	0.0	0.0	0.0	0.0	49.0	0.0	0.0	0.0	0.0	0.0	0.0	0.0	0.0	59.0	0.0	48.0	0.0	25.0	0.0	106.0	0.0
OTU 371	0.0	0.0	0.0	0.0	0.0	0.0	30.0	0.0	28.0	0.0	29.0	40.0	0.0	0.0	0.0	11.0	0.0	86.0	0.0	0.0	0.0	44.0	56.0	0.0	35.0	9.0	0.0	0.0	0.0	0.0	0.0
OTU 372	59.0	0.0	0.0	13.0	61.0	0.0	21.0	0.0	0.0	0.0	0.0	0.0	6.0	0.0	0.0	112.0	0.0	0.0	0.0	0.0	0.0	0.0	0.0	34.0	10.0	28.0	0.0	23.0	0.0	0.0	0.0
OTU 373	12.0	0.0	0.0	0.0	0.0	21.0	0.0	0.0	17.0	6.0	61.0	19.0	0.0	53.0	0.0	0.0	0.0	0.0	0.0	12.0	0.0	0.0	26.0	19.0	27.0	26.0	0.0	26.0	0.0	42.0	0.0
OTU 374	8.0	0.0	0.0	0.0	0.0	0.0	0.0	30.0	0.0	74.0	51.0	0.0	23.0	0.0	0.0	0.0	0.0	0.0	0.0	0.0	28.0	0.0	0.0	22.0	11.0	25.0	0.0	27.0	0.0	67.0	0.0
OTU 375	0.0	0.0	0.0	19.0	23.0	12.0	22.0	0.0	34.0	19.0	0.0	22.0	0.0	0.0	0.0	22.0	0.0	0.0	0.0	8.0	0.0	24.0	24.0	20.0	63.0	28.0	0.0	25.0	0.0	0.0	0.0
OTU 376	34.0	0.0	0.0	26.0	39.0	0.0	29.0	0.0	0.0	18.0	25.0	0.0	58.0	0.0	0.0	23.0	19.0	25.0	0.0	0.0	0.0	0.0	0.0	0.0	19.0	31.0	0.0	17.0	0.0	0.0	0.0
OTU 377	25.0	0.0	0.0	0.0	0.0	0.0	0.0	0.0	0.0	0.0	67.0	40.0	58.0	89.0	0.0	0.0	0.0	0.0	0.0	0.0	0.0	0.0	43.0	0.0	41.0	0.0	0.0	0.0	0.0	0.0	0.0
OTU 378	0.0	0.0	0.0	0.0	0.0	0.0	0.0	0.0	0.0	362.0	0.0	0.0	0.0	0.0	0.0	0.0	0.0	0.0	0.0	0.0	0.0	0.0	0.0	0.0	0.0	0.0	0.0	0.0	0.0	0.0	0.0
OTU 379	34.0	0.0	0.0	0.0	79.0	94.0	0.0	0.0	0.0	0.0	0.0	0.0	0.0	0.0	0.0	0.0	13.0	21.0	0.0	0.0	0.0	0.0	0.0	107.0	13.0	0.0	0.0	0.0	0.0	0.0	0.0
OTU 380	15.0	33.0	0.0	0.0	27.0	0.0	0.0	0.0	0.0	0.0	0.0	88.0	23.0	0.0	0.0	23.0	26.0	13.0	0.0	27.0	54.0	0.0	0.0	0.0	15.0	17.0	0.0	0.0	0.0	0.0	0.0
OTU 381	0.0	0.0	0.0	19.0	24.0	16.0	0.0	54.0	19.0	25.0	0.0	18.0	18.0	0.0	0.0	0.0	0.0	0.0	0.0	0.0	27.0	5.0	31.0	19.0	21.0	21.0	0.0	20.0	0.0	22.0	0.0
OTU 382	0.0	0.0	30.0	29.0	14.0	0.0	0.0	0.0	30.0	0.0	0.0	25.0	0.0	53.0	0.0	18.0	0.0	0.0	0.0	0.0	31.0	20.0	42.0	14.0	16.0	14.0	0.0	0.0	0.0	19.0	0.0
OTU 383	0.0	0.0	54.0	0.0	16.0	0.0	31.0	0.0	0.0	0.0	14.0	30.0	0.0	0.0	0.0	0.0	0.0	0.0	0.0	0.0	0.0	0.0	8.0	17.0	0.0	17.0	33.0	0.0	134.0	0.0	0.0
OTU 384	0.0	0.0	0.0	13.0	16.0	26.0	12.0	22.0	15.0	50.0	0.0	18.0	0.0	0.0	41.0	13.0	0.0	0.0	0.0	0.0	17.0	24.0	0.0	18.0	18.0	21.0	0.0	30.0	0.0	0.0	0.0
OTU 385	0.0	0.0	16.0	17.0	25.0	12.0	11.0	0.0	23.0	9.0	8.0	21.0	0.0	8.0	12.0	22.0	0.0	0.0	0.0	18.0	27.0	10.0	20.0	16.0	0.0	29.0	7.0	23.0	0.0	18.0	0.0
OTU 386	0.0	0.0	0.0	107.0	0.0	0.0	0.0	0.0	0.0	0.0	0.0	0.0	0.0	0.0	0.0	0.0	0.0	0.0	0.0	0.0	44.0	0.0	0.0	102.0	99.0	0.0	0.0	0.0	0.0	0.0	0.0
OTU 387	21.0	0.0	0.0	25.0	0.0	12.0	18.0	20.0	20.0	18.0	17.0	0.0	0.0	0.0	0.0	5.0	0.0	0.0	0.0	9.0	0.0	29.0	64.0	21.0	16.0	30.0	0.0	26.0	0.0	0.0	0.0
OTU 388	20.0	22.0	0.0	0.0	0.0	0.0	0.0	40.0	0.0	12.0	0.0	0.0	21.0	40.0	0.0	13.0	0.0	26.0	0.0	13.0	0.0	9.0	0.0	86.0	20.0	16.0	0.0	12.0	0.0	0.0	0.0
OTU 389	0.0	0.0	0.0	6.0	28.0	13.0	10.0	14.0	13.0	28.0	16.0	8.0	0.0	0.0	7.0	6.0	0.0	0.0	0.0	11.0	10.0	22.0	0.0	10.0	16.0	40.0	44.0	47.0	0.0	0.0	0.0
OTU 390	31.0	0.0	0.0	0.0	0.0	0.0	0.0	30.0	0.0	0.0	0.0	0.0	24.0	35.0	0.0	0.0	0.0	0.0	0.0	0.0	0.0	0.0	0.0	0.0	0.0	0.0	56.0	0.0	129.0	0.0	43.0
OTU 391	77.0	0.0	0.0	0.0	93.0	0.0	39.0	0.0	19.0	0.0	0.0	0.0	0.0	0.0	0.0	2.0	0.0	0.0	0.0	0.0	0.0	0.0	0.0	0.0	21.0	14.0	0.0	45.0	0.0	0.0	37.0
OTU 392	0.0	0.0	69.0	7.0	23.0	0.0	0.0	0.0	25.0	14.0	0.0	14.0	0.0	0.0	0.0	0.0	0.0	0.0	0.0	0.0	21.0	20.0	9.0	31.0	30.0	49.0	0.0	32.0	0.0	0.0	0.0
OTU 393	0.0	0.0	0.0	14.0	35.0	5.0	0.0	0.0	0.0	0.0	0.0	17.0	31.0	0.0	0.0	10.0	19.0	20.0	64.0	0.0	0.0	54.0	0.0	31.0	10.0	11.0	0.0	15.0	8.0	0.0	0.0
OTU 394	0.0	0.0	0.0	0.0	0.0	0.0	0.0	0.0	0.0	53.0	0.0	0.0	0.0	35.0	0.0	0.0	0.0	0.0	0.0	0.0	67.0	0.0	61.0	0.0	0.0	37.0	0.0	0.0	0.0	87.0	0.0
OTU 395	11.0	44.0	46.0	0.0	0.0	0.0	0.0	0.0	0.0	0.0	0.0	0.0	9.0	72.0	0.0	0.0	0.0	0.0	0.0	0.0	28.0	0.0	90.0	0.0	0.0	0.0	0.0	23.0	0.0	15.0	0.0
OTU 396	11.0	0.0	0.0	25.0	0.0	0.0	0.0	0.0	26.0	15.0	22.0	18.0	76.0	17.0	0.0	0.0	0.0	0.0	0.0	37.0	0.0	0.0	25.0	8.0	22.0	11.0	0.0	14.0	0.0	9.0	0.0
OTU 397	0.0	0.0	0.0	0.0	0.0	0.0	25.0	15.0	14.0	0.0	22.0	11.0	0.0	11.0	15.0	0.0	0.0	0.0	0.0	19.0	29.0	46.0	28.0	0.0	0.0	23.0	22.0	19.0	0.0	17.0	20.0
OTU 398	19.0	314.0	0.0	0.0	0.0	0.0	0.0	0.0	0.0	0.0	0.0	0.0	0.0	0.0	0.0	0.0	0.0	0.0	0.0	0.0	0.0	0.0	0.0	0.0	0.0	0.0	0.0	0.0	0.0	0.0	0.0
OTU 399	0.0	0.0	0.0	0.0	0.0	0.0	0.0	0.0	0.0	0.0	0.0	86.0	0.0	0.0	0.0	50.0	0.0	0.0	0.0	0.0	108.0	0.0	0.0	89.0	0.0	0.0	0.0	0.0	0.0	0.0	0.0
OTU 400	0.0	0.0	0.0	0.0	0.0	30.0	77.0	0.0	0.0	0.0	71.0	59.0	0.0	0.0	0.0	0.0	0.0	0.0	32.0	0.0	0.0	0.0	0.0	0.0	0.0	0.0	0.0	0.0	62.0	0.0	0.0
OTU 401	30.0	36.0	0.0	4.0	0.0	0.0	0.0	0.0	0.0	0.0	0.0	0.0	0.0	0.0	0.0	49.0	0.0	0.0	0.0	15.0	0.0	0.0	0.0	0.0	0.0	0.0	12.0	63.0	121.0	0.0	0.0
OTU 402	0.0	0.0	0.0	0.0	0.0	0.0	0.0	0.0	0.0	330.0	0.0	0.0	0.0	0.0	0.0	0.0	0.0	0.0	0.0	0.0	0.0	0.0	0.0	0.0	0.0	0.0	0.0	0.0	0.0	0.0	0.0
OTU 403	34.0	32.0	0.0	0.0	41.0	0.0	0.0	0.0	28.0	0.0	0.0	0.0	33.0	0.0	0.0	0.0	0.0	0.0	0.0	0.0	0.0	0.0	33.0	48.0	24.0	55.0	0.0	0.0	0.0	0.0	0.0
OTU 404	0.0	0.0	95.0	0.0	37.0	5.0	19.0	14.0	18.0	0.0	9.0	0.0	18.0	0.0	0.0	0.0	0.0	6.0	0.0	36.0	14.0	28.0	16.0	0.0	13.0	0.0	0.0	0.0	0.0	0.0	0.0
OTU 405	0.0	0.0	0.0	46.0	0.0	31.0	27.0	0.0	0.0	0.0	17.0	0.0	26.0	0.0	33.0	0.0	0.0	0.0	0.0	0.0	21.0	0.0	0.0	0.0	80.0	0.0	47.0	0.0	0.0	0.0	0.0
OTU 406	12.0	0.0	0.0	32.0	7.0	17.0	0.0	0.0	15.0	0.0	0.0	0.0	0.0	0.0	0.0	0.0	0.0	0.0	23.0	90.0	32.0	35.0	0.0	14.0	49.0	0.0	0.0	0.0	0.0	0.0	0.0
OTU 407	0.0	0.0	0.0	0.0	0.0	0.0	104.0	0.0	0.0	0.0	52.0	32.0	0.0	0.0	0.0	0.0	0.0	0.0	33.0	0.0	0.0	0.0	0.0	0.0	0.0	0.0	0.0	0.0	105.0	0.0	0.0
OTU 408	65.0	15.0	0.0	0.0	19.0	0.0	0.0	0.0	0.0	6.0	0.0	5.0	26.0	12.0	0.0	2.0	0.0	0.0	0.0	0.0	7.0	0.0	45.0	14.0	50.0	19.0	11.0	4.0	25.0	0.0	0.0
OTU 409	34.0	16.0	0.0	5.0	0.0	6.0	18.0	0.0	0.0	14.0	4.0	0.0	23.0	9.0	0.0	11.0	6.0	8.0	0.0	0.0	0.0	0.0	9.0	6.0	12.0	61.0	15.0	67.0	0.0	0.0	0.0
OTU 410	11.0	0.0	0.0	32.0	23.0	11.0	0.0	3.0	18.0	0.0	74.0	0.0	0.0	0.0	0.0	58.0	0.0	0.0	0.0	0.0	15.0	0.0	16.0	0.0	0.0	0.0	0.0	0.0	63.0	0.0	0.0
OTU 411	0.0	23.0	0.0	19.0	0.0	22.0	11.0	25.0	25.0	0.0	27.0	18.0	29.0	9.0	0.0	11.0	0.0	0.0	0.0	20.0	13.0	0.0	38.0	0.0	6.0	15.0	0.0	0.0	0.0	13.0	0.0
OTU 412	0.0	0.0	0.0	0.0	18.0	0.0	46.0	0.0	0.0	0.0	16.0	40.0	0.0	0.0	0.0	0.0	0.0	0.0	0.0	0.0	0.0	0.0	0.0	20.0	0.0	27.0	7.0	47.0	103.0	0.0	0.0
OTU 413	0.0	0.0	0.0	0.0	15.0	0.0	0.0	0.0	0.0	15.0	0.0	40.0	0.0	0.0	9.0	0.0	0.0	0.0	0.0	26.0	16.0	0.0	0.0	0.0	13.0	0.0	12.0	0.0	0.0	34.0	144.0
OTU 414	0.0	0.0	0.0	0.0	0.0	0.0	15.0	38.0	23.0	0.0	10.0	19.0	0.0	0.0	12.0	0.0	0.0	0.0	0.0	43.0	20.0	31.0	13.0	15.0	0.0	9.0	0.0	12.0	0.0	24.0	39.0
OTU 415	0.0	0.0	10.0	19.0	20.0	9.0	0.0	0.0	22.0	7.0	0.0	4.0	10.0	13.0	7.0	0.0	0.0	0.0	9.0	10.0	11.0	10.0	13.0	30.0	63.0	19.0	14.0	22.0	0.0	0.0	0.0
OTU 416	6.0	0.0	0.0	11.0	0.0	0.0	0.0	0.0	0.0	0.0	71.0	94.0	33.0	0.0	0.0	65.0	0.0	0.0	0.0	18.0	0.0	23.0	0.0	0.0	0.0	0.0	0.0	0.0	0.0	0.0	0.0
OTU 417	0.0	0.0	0.0	18.0	16.0	12.0	0.0	0.0	0.0	0.0	0.0	25.0	0.0	4.0	0.0	16.0	20.0	12.0	0.0	0.0	0.0	70.0	30.0	10.0	31.0	14.0	0.0	19.0	24.0	0.0	0.0
OTU 418	26.0	9.0	6.0	11.0	16.0	0.0	0.0	0.0	9.0	4.0	0.0	14.0	17.0	16.0	0.0	0.0	0.0	0.0	0.0	10.0	13.0	10.0	71.0	22.0	35.0	0.0	14.0	3.0	3.0	11.0	0.0
OTU 419	0.0	0.0	62.0	20.0	20.0	37.0	0.0	0.0	44.0	0.0	0.0	24.0	0.0	0.0	0.0	50.0	0.0	0.0	0.0	0.0	13.0	0.0	24.0	8.0	9.0	0.0	0.0	0.0	0.0	8.0	0.0
OTU 420	0.0	0.0	14.0	0.0	0.0	0.0	0.0	0.0	0.0	0.0	0.0	21.0	0.0	0.0	0.0	0.0	16.0	13.0	0.0	0.0	0.0	0.0	13.0	31.0	28.0	0.0	0.0	0.0	183.0	0.0	0.0
OTU 421	0.0	0.0	0.0	0.0	36.0	0.0	0.0	0.0	0.0	0.0	0.0	77.0	0.0	0.0	0.0	0.0	0.0	0.0	0.0	0.0	0.0	99.0	0.0	70.0	0.0	16.0	0.0	21.0	0.0	0.0	0.0
OTU 422	0.0	0.0	0.0	0.0	25.0	63.0	39.0	0.0	20.0	0.0	25.0	0.0	0.0	0.0	0.0	17.0	0.0	0.0	0.0	0.0	17.0	0.0	28.0	0.0	0.0	23.0	29.0	26.0	0.0	7.0	0.0
OTU 423	37.0	0.0	0.0	33.0	0.0	17.0	11.0	0.0	0.0	9.0	8.0	0.0	36.0	0.0	0.0	36.0	7.0	7.0	15.0	15.0	10.0	0.0	0.0	0.0	27.0	0.0	32.0	0.0	0.0	17.0	0.0
OTU 424	0.0	44.0	0.0	0.0	0.0	0.0	0.0	0.0	15.0	59.0	0.0	95.0	48.0	0.0	0.0	0.0	0.0	56.0	0.0	0.0	0.0	0.0	0.0	0.0	0.0	0.0	0.0	0.0	0.0	0.0	0.0
OTU 425	0.0	0.0	0.0	16.0	0.0	0.0	21.0	0.0	87.0	0.0	20.0	0.0	0.0	0.0	0.0	0.0	0.0	0.0	81.0	0.0	0.0	0.0	52.0	0.0	0.0	20.0	0.0	20.0	0.0	0.0	0.0
OTU 426	0.0	0.0	0.0	0.0	0.0	0.0	55.0	87.0	0.0	0.0	0.0	22.0	0.0	0.0	20.0	0.0	0.0	0.0	0.0	16.0	0.0	47.0	0.0	0.0	0.0	0.0	0.0	0.0	0.0	9.0	61.0
OTU 427	27.0	0.0	0.0	0.0	12.0	0.0	0.0	0.0	8.0	3.0	19.0	0.0	6.0	0.0	0.0	0.0	0.0	4.0	0.0	0.0	0.0	0.0	0.0	14.0	28.0	37.0	0.0	20.0	137.0	0.0	0.0
OTU 428	20.0	0.0	0.0	23.0	24.0	0.0	26.0	0.0	0.0	30.0	29.0	19.0	44.0	0.0	0.0	9.0	15.0	17.0	0.0	0.0	0.0	0.0	11.0	11.0	10.0	15.0	0.0	12.0	0.0	0.0	0.0
OTU 429	0.0	0.0	0.0	70.0	0.0	0.0	0.0	0.0	0.0	0.0	92.0	0.0	0.0	63.0	0.0	0.0	0.0	0.0	0.0	0.0	0.0	0.0	40.0	0.0	0.0	21.0	0.0	27.0	0.0	0.0	0.0
OTU 430	0.0	0.0	0.0	40.0	26.0	10.0	6.0	9.0	19.0	0.0	16.0	0.0	23.0	0.0	0.0	82.0	30.0	0.0	0.0	0.0	11.0	14.0	0.0	0.0	26.0	0.0	0.0	0.0	0.0	0.0	0.0
OTU 431	0.0	0.0	0.0	17.0	0.0	0.0	70.0	14.0	0.0	0.0	47.0	12.0	0.0	0.0	0.0	0.0	0.0	0.0	30.0	17.0	0.0	27.0	0.0	0.0	0.0	44.0	0.0	34.0	0.0	0.0	0.0
OTU 432	0.0	0.0	0.0	0.0	0.0	0.0	30.0	52.0	56.0	16.0	33.0	0.0	0.0	0.0	15.0	0.0	0.0	0.0	0.0	17.0	0.0	11.0	0.0	0.0	0.0	48.0	0.0	33.0	0.0	0.0	0.0
OTU 433	0.0	0.0	0.0	0.0	0.0	0.0	0.0	115.0	14.0	22.0	0.0	0.0	0.0	0.0	0.0	0.0	0.0	0.0	0.0	0.0	0.0	14.0	42.0	0.0	14.0	28.0	0.0	17.0	0.0	45.0	0.0
OTU 434	93.0	0.0	0.0	0.0	54.0	3.0	13.0	9.0	8.0	0.0	5.0	0.0	12.0	0.0	0.0	0.0	0.0	1.0	47.0	17.0	6.0	25.0	5.0	0.0	11.0	0.0	0.0	0.0	0.0	0.0	0.0
OTU 435	18.0	0.0	0.0	17.0	46.0	0.0	0.0	38.0	0.0	42.0	0.0	0.0	27.0	0.0	0.0	69.0	0.0	0.0	0.0	0.0	0.0	0.0	0.0	0.0	0.0	0.0	10.0	29.0	0.0	13.0	0.0
OTU 436	0.0	0.0	22.0	0.0	0.0	0.0	0.0	0.0	0.0	0.0	0.0	0.0	11.0	72.0	0.0	0.0	0.0	0.0	0.0	0.0	0.0	0.0	0.0	0.0	0.0	0.0	0.0	0.0	0.0	204.0	0.0
OTU 437	10.0	17.0	0.0	32.0	0.0	0.0	0.0	0.0	0.0	0.0	0.0	0.0	0.0	0.0	0.0	17.0	0.0	0.0	98.0	39.0	0.0	0.0	0.0	0.0	0.0	32.0	0.0	25.0	19.0	19.0	0.0
OTU 438	0.0	0.0	0.0	0.0	15.0	27.0	0.0	0.0	13.0	0.0	0.0	0.0	12.0	66.0	71.0	0.0	0.0	0.0	0.0	13.0	14.0	18.0	59.0	0.0	0.0	0.0	0.0	0.0	0.0	0.0	0.0
OTU 439	32.0	23.0	0.0	18.0	0.0	23.0	0.0	0.0	22.0	31.0	0.0	24.0	23.0	11.0	0.0	18.0	0.0	0.0	0.0	0.0	0.0	0.0	23.0	33.0	14.0	0.0	0.0	0.0	0.0	12.0	0.0
OTU 440	0.0	0.0	0.0	16.0	15.0	26.0	35.0	18.0	7.0	42.0	8.0	12.0	0.0	0.0	0.0	16.0	0.0	0.0	0.0	0.0	12.0	15.0	0.0	25.0	8.0	24.0	0.0	27.0	0.0	0.0	0.0
OTU 441	0.0	0.0	0.0	0.0	13.0	0.0	36.0	0.0	0.0	0.0	16.0	50.0	0.0	0.0	0.0	0.0	0.0	0.0	0.0	0.0	0.0	0.0	0.0	19.0	0.0	55.0	15.0	0.0	102.0	0.0	0.0
OTU 442	0.0	0.0	78.0	11.0	20.0	8.0	0.0	0.0	21.0	17.0	0.0	8.0	15.0	0.0	13.0	0.0	0.0	0.0	0.0	0.0	16.0	0.0	10.0	16.0	12.0	36.0	0.0	14.0	0.0	9.0	0.0
OTU 443	0.0	0.0	0.0	9.0	20.0	0.0	0.0	0.0	8.0	12.0	0.0	20.0	0.0	10.0	0.0	0.0	0.0	0.0	0.0	0.0	50.0	32.0	20.0	34.0	39.0	26.0	0.0	24.0	0.0	0.0	0.0
OTU 444	0.0	0.0	0.0	0.0	0.0	0.0	25.0	11.0	16.0	17.0	21.0	15.0	0.0	14.0	8.0	0.0	0.0	0.0	0.0	12.0	12.0	14.0	0.0	65.0	0.0	16.0	6.0	28.0	0.0	6.0	18.0
OTU 445	0.0	0.0	0.0	0.0	0.0	0.0	12.0	35.0	20.0	0.0	8.0	20.0	0.0	0.0	10.0	0.0	0.0	0.0	0.0	50.0	20.0	41.0	8.0	15.0	0.0	15.0	0.0	14.0	0.0	13.0	23.0
OTU 446	0.0	0.0	0.0	24.0	0.0	18.0	14.0	17.0	0.0	0.0	32.0	0.0	19.0	0.0	0.0	0.0	0.0	92.0	74.0	0.0	0.0	0.0	0.0	0.0	0.0	0.0	13.0	0.0	0.0	0.0	0.0
OTU 447	0.0	0.0	0.0	21.0	16.0	12.0	17.0	0.0	22.0	19.0	0.0	21.0	0.0	0.0	0.0	24.0	0.0	0.0	0.0	16.0	0.0	12.0	17.0	18.0	47.0	24.0	0.0	17.0	0.0	0.0	0.0
OTU 448	0.0	0.0	0.0	27.0	0.0	48.0	21.0	0.0	0.0	0.0	0.0	0.0	23.0	0.0	74.0	14.0	0.0	0.0	0.0	0.0	35.0	0.0	26.0	20.0	14.0	0.0	0.0	0.0	0.0	0.0	0.0
OTU 449	0.0	0.0	0.0	0.0	0.0	65.0	0.0	0.0	31.0	0.0	27.0	0.0	0.0	62.0	0.0	19.0	0.0	0.0	0.0	0.0	0.0	46.0	0.0	0.0	35.0	16.0	0.0	0.0	0.0	0.0	0.0
OTU 450	0.0	0.0	0.0	0.0	0.0	0.0	31.0	19.0	0.0	0.0	0.0	0.0	0.0	0.0	86.0	0.0	0.0	0.0	0.0	48.0	0.0	11.0	0.0	0.0	0.0	0.0	0.0	0.0	0.0	86.0	20.0
OTU 451	0.0	0.0	68.0	0.0	11.0	12.0	23.0	0.0	0.0	0.0	19.0	5.0	0.0	0.0	0.0	0.0	0.0	0.0	0.0	0.0	0.0	0.0	0.0	0.0	49.0	45.0	53.0	15.0	0.0	0.0	0.0
OTU 452	29.0	128.0	0.0	11.0	45.0	13.0	0.0	0.0	0.0	40.0	0.0	0.0	0.0	0.0	0.0	0.0	0.0	0.0	0.0	0.0	0.0	0.0	0.0	0.0	15.0	0.0	0.0	0.0	16.0	2.0	0.0
OTU 453	0.0	0.0	58.0	45.0	23.0	0.0	0.0	0.0	71.0	0.0	0.0	0.0	25.0	0.0	0.0	0.0	0.0	0.0	0.0	0.0	0.0	0.0	77.0	0.0	0.0	0.0	0.0	0.0	0.0	0.0	0.0
OTU 454	24.0	87.0	0.0	0.0	0.0	0.0	0.0	0.0	0.0	0.0	0.0	0.0	17.0	23.0	0.0	0.0	0.0	0.0	0.0	0.0	14.0	64.0	0.0	0.0	0.0	0.0	0.0	59.0	0.0	10.0	0.0
OTU 455	31.0	9.0	0.0	0.0	31.0	0.0	0.0	0.0	28.0	0.0	0.0	0.0	28.0	0.0	0.0	0.0	0.0	0.0	0.0	0.0	0.0	0.0	29.0	48.0	25.0	52.0	16.0	0.0	0.0	0.0	0.0
OTU 456	20.0	5.0	11.0	10.0	13.0	0.0	0.0	0.0	17.0	7.0	0.0	20.0	25.0	18.0	0.0	0.0	0.0	0.0	0.0	4.0	8.0	3.0	60.0	15.0	27.0	0.0	7.0	8.0	7.0	12.0	0.0
OTU 457	5.0	0.0	0.0	0.0	13.0	0.0	0.0	0.0	31.0	69.0	88.0	0.0	29.0	0.0	0.0	0.0	0.0	42.0	0.0	0.0	0.0	0.0	16.0	0.0	0.0	0.0	0.0	0.0	0.0	0.0	0.0
OTU 458	0.0	0.0	0.0	14.0	18.0	0.0	0.0	0.0	26.0	0.0	0.0	15.0	0.0	0.0	0.0	0.0	0.0	0.0	0.0	0.0	35.0	12.0	37.0	42.0	55.0	19.0	0.0	18.0	0.0	0.0	0.0
OTU 459	0.0	0.0	0.0	0.0	0.0	0.0	0.0	0.0	39.0	0.0	0.0	54.0	0.0	29.0	0.0	0.0	0.0	0.0	0.0	0.0	61.0	11.0	23.0	74.0	0.0	0.0	0.0	0.0	0.0	0.0	0.0
OTU 460	39.0	0.0	0.0	16.0	9.0	6.0	31.0	13.0	9.0	0.0	20.0	2.0	0.0	7.0	0.0	10.0	0.0	0.0	0.0	0.0	0.0	1.0	0.0	0.0	6.0	41.0	33.0	37.0	0.0	9.0	0.0
OTU 461	0.0	0.0	0.0	28.0	11.0	8.0	0.0	0.0	24.0	20.0	0.0	18.0	13.0	0.0	27.0	0.0	0.0	0.0	0.0	0.0	21.0	0.0	17.0	27.0	14.0	23.0	0.0	26.0	0.0	12.0	0.0
OTU 462	91.0	42.0	0.0	0.0	35.0	0.0	0.0	0.0	33.0	0.0	0.0	0.0	15.0	0.0	0.0	0.0	0.0	0.0	0.0	0.0	0.0	0.0	16.0	36.0	20.0	0.0	0.0	0.0	0.0	0.0	0.0
OTU 463	0.0	33.0	0.0	0.0	0.0	0.0	14.0	20.0	60.0	74.0	5.0	0.0	0.0	0.0	0.0	0.0	0.0	41.0	0.0	34.0	7.0	0.0	0.0	0.0	0.0	0.0	0.0	0.0	0.0	0.0	0.0
OTU 464	0.0	0.0	0.0	11.0	20.0	0.0	0.0	0.0	14.0	0.0	0.0	0.0	0.0	0.0	0.0	0.0	0.0	0.0	0.0	0.0	31.0	0.0	22.0	27.0	52.0	62.0	0.0	48.0	0.0	0.0	0.0
OTU 465	0.0	0.0	0.0	0.0	31.0	0.0	0.0	0.0	0.0	0.0	0.0	0.0	0.0	0.0	0.0	0.0	0.0	0.0	0.0	0.0	65.0	57.0	114.0	0.0	0.0	0.0	0.0	20.0	0.0	0.0	0.0
OTU 466	0.0	0.0	0.0	8.0	30.0	0.0	0.0	0.0	0.0	0.0	0.0	72.0	0.0	0.0	0.0	26.0	0.0	0.0	0.0	70.0	0.0	0.0	22.0	0.0	58.0	0.0	0.0	0.0	0.0	0.0	0.0
OTU 467	0.0	0.0	0.0	0.0	0.0	0.0	28.0	0.0	0.0	0.0	23.0	43.0	0.0	0.0	0.0	0.0	0.0	0.0	0.0	0.0	86.0	0.0	0.0	0.0	0.0	0.0	28.0	0.0	0.0	63.0	13.0
OTU 468	0.0	0.0	0.0	0.0	0.0	0.0	14.0	0.0	0.0	0.0	37.0	37.0	0.0	68.0	0.0	0.0	0.0	0.0	33.0	0.0	0.0	0.0	0.0	0.0	0.0	0.0	17.0	0.0	0.0	78.0	0.0
OTU 469	0.0	0.0	0.0	33.0	7.0	6.0	43.0	0.0	0.0	0.0	11.0	9.0	0.0	0.0	0.0	0.0	0.0	0.0	97.0	0.0	0.0	0.0	0.0	0.0	25.0	26.0	0.0	26.0	0.0	0.0	0.0
OTU 470	0.0	0.0	0.0	0.0	0.0	0.0	0.0	0.0	0.0	0.0	107.0	0.0	0.0	0.0	0.0	0.0	0.0	0.0	0.0	45.0	0.0	0.0	0.0	0.0	0.0	0.0	0.0	0.0	0.0	19.0	112.0
OTU 471	0.0	0.0	0.0	0.0	0.0	0.0	20.0	0.0	0.0	0.0	0.0	0.0	0.0	0.0	0.0	0.0	0.0	0.0	99.0	0.0	0.0	0.0	0.0	0.0	0.0	49.0	0.0	17.0	97.0	0.0	0.0
OTU 472	0.0	0.0	0.0	35.0	0.0	0.0	13.0	0.0	0.0	19.0	0.0	0.0	12.0	27.0	0.0	16.0	0.0	75.0	0.0	0.0	14.0	0.0	18.0	0.0	51.0	0.0	0.0	0.0	0.0	0.0	0.0
OTU 473	0.0	0.0	0.0	0.0	0.0	0.0	17.0	33.0	14.0	0.0	3.0	5.0	0.0	0.0	9.0	0.0	0.0	0.0	0.0	23.0	15.0	27.0	2.0	19.0	0.0	20.0	9.0	17.0	0.0	6.0	61.0
OTU 474	0.0	0.0	0.0	0.0	0.0	0.0	0.0	0.0	0.0	0.0	0.0	7.0	0.0	21.0	0.0	0.0	0.0	0.0	18.0	0.0	0.0	0.0	0.0	0.0	0.0	77.0	36.0	121.0	0.0	0.0	0.0
OTU 475	10.0	0.0	0.0	0.0	20.0	56.0	0.0	0.0	27.0	32.0	0.0	30.0	31.0	0.0	0.0	0.0	58.0	0.0	0.0	0.0	0.0	0.0	15.0	0.0	0.0	0.0	0.0	0.0	0.0	0.0	0.0
OTU 476	0.0	0.0	0.0	61.0	0.0	0.0	0.0	0.0	0.0	79.0	0.0	0.0	0.0	0.0	0.0	66.0	0.0	0.0	0.0	0.0	18.0	0.0	55.0	0.0	0.0	0.0	0.0	0.0	0.0	0.0	0.0
OTU 477	0.0	0.0	0.0	0.0	15.0	0.0	0.0	0.0	0.0	9.0	0.0	14.0	0.0	0.0	13.0	0.0	0.0	0.0	0.0	11.0	24.0	0.0	0.0	0.0	7.0	0.0	22.0	0.0	0.0	0.0	164.0
OTU 478	28.0	0.0	0.0	0.0	0.0	0.0	0.0	51.0	0.0	0.0	0.0	0.0	39.0	60.0	0.0	0.0	0.0	0.0	0.0	0.0	0.0	0.0	0.0	0.0	0.0	99.0	0.0	0.0	0.0	0.0	0.0
OTU 479	13.0	34.0	0.0	0.0	0.0	0.0	0.0	22.0	0.0	0.0	0.0	0.0	24.0	0.0	0.0	12.0	0.0	9.0	0.0	10.0	0.0	38.0	30.0	0.0	21.0	17.0	0.0	25.0	0.0	0.0	22.0
OTU 480	0.0	0.0	0.0	0.0	17.0	0.0	0.0	0.0	0.0	53.0	0.0	9.0	0.0	0.0	0.0	22.0	0.0	0.0	0.0	0.0	0.0	87.0	0.0	88.0	0.0	0.0	0.0	0.0	0.0	0.0	0.0
OTU 481	9.0	0.0	0.0	34.0	0.0	0.0	0.0	0.0	42.0	0.0	0.0	0.0	11.0	67.0	0.0	0.0	0.0	49.0	0.0	0.0	0.0	0.0	0.0	0.0	22.0	16.0	0.0	25.0	0.0	0.0	0.0
OTU 482	0.0	0.0	3.0	14.0	15.0	11.0	7.0	0.0	12.0	18.0	5.0	12.0	0.0	6.0	8.0	23.0	0.0	0.0	0.0	4.0	35.0	17.0	17.0	23.0	0.0	10.0	4.0	15.0	0.0	15.0	0.0
OTU 483	0.0	0.0	0.0	35.0	0.0	22.0	9.0	33.0	61.0	0.0	12.0	0.0	20.0	0.0	0.0	0.0	0.0	0.0	0.0	0.0	0.0	0.0	82.0	0.0	0.0	0.0	0.0	0.0	0.0	0.0	0.0
OTU 484	0.0	0.0	0.0	0.0	0.0	0.0	0.0	0.0	29.0	45.0	0.0	0.0	48.0	0.0	0.0	6.0	0.0	0.0	0.0	0.0	124.0	0.0	0.0	0.0	22.0	0.0	0.0	0.0	0.0	0.0	0.0
OTU 485	41.0	58.0	0.0	21.0	0.0	0.0	33.0	0.0	0.0	0.0	0.0	0.0	17.0	0.0	0.0	0.0	0.0	0.0	103.0	0.0	0.0	0.0	0.0	0.0	0.0	0.0	0.0	0.0	0.0	0.0	0.0
OTU 486	30.0	20.0	0.0	0.0	51.0	0.0	0.0	0.0	30.0	0.0	0.0	0.0	16.0	0.0	0.0	0.0	0.0	0.0	0.0	0.0	0.0	0.0	16.0	32.0	19.0	47.0	12.0	0.0	0.0	0.0	0.0
OTU 487	0.0	0.0	0.0	49.0	0.0	0.0	0.0	0.0	0.0	0.0	0.0	0.0	0.0	0.0	25.0	0.0	0.0	0.0	0.0	27.0	0.0	0.0	0.0	0.0	0.0	0.0	0.0	0.0	0.0	75.0	97.0
OTU 488	0.0	0.0	0.0	11.0	0.0	7.0	0.0	0.0	44.0	30.0	0.0	0.0	0.0	0.0	0.0	0.0	0.0	0.0	0.0	12.0	32.0	10.0	27.0	31.0	36.0	14.0	19.0	0.0	0.0	0.0	0.0
OTU 489	0.0	0.0	0.0	0.0	0.0	0.0	22.0	43.0	17.0	0.0	8.0	13.0	0.0	0.0	9.0	0.0	0.0	0.0	0.0	22.0	13.0	20.0	4.0	5.0	0.0	20.0	2.0	16.0	0.0	5.0	53.0
OTU 490	0.0	0.0	0.0	0.0	0.0	0.0	28.0	17.0	17.0	23.0	9.0	15.0	0.0	13.0	14.0	0.0	0.0	0.0	0.0	9.0	5.0	18.0	0.0	0.0	0.0	30.0	8.0	31.0	0.0	8.0	26.0
OTU 491	0.0	0.0	0.0	0.0	0.0	0.0	11.0	34.0	15.0	0.0	12.0	25.0	0.0	0.0	12.0	0.0	0.0	0.0	0.0	42.0	12.0	19.0	6.0	15.0	0.0	9.0	0.0	16.0	0.0	18.0	25.0
OTU 492	0.0	0.0	0.0	0.0	0.0	0.0	0.0	0.0	0.0	0.0	0.0	0.0	0.0	0.0	20.0	0.0	0.0	0.0	85.0	21.0	0.0	0.0	0.0	0.0	0.0	0.0	0.0	0.0	0.0	0.0	145.0
OTU 493	0.0	0.0	0.0	0.0	0.0	0.0	0.0	0.0	0.0	0.0	0.0	0.0	0.0	0.0	0.0	0.0	0.0	0.0	0.0	0.0	0.0	0.0	0.0	0.0	0.0	67.0	0.0	120.0	84.0	0.0	0.0
OTU 494	80.0	0.0	0.0	0.0	0.0	0.0	36.0	0.0	0.0	0.0	24.0	14.0	0.0	0.0	0.0	0.0	0.0	0.0	50.0	0.0	0.0	0.0	0.0	0.0	0.0	0.0	25.0	0.0	0.0	41.0	0.0
OTU 495	0.0	0.0	0.0	0.0	0.0	0.0	0.0	0.0	0.0	0.0	0.0	0.0	0.0	0.0	0.0	0.0	0.0	0.0	0.0	0.0	0.0	0.0	0.0	0.0	0.0	0.0	0.0	0.0	0.0	0.0	270.0
OTU 496	0.0	0.0	0.0	0.0	20.0	0.0	47.0	0.0	0.0	0.0	12.0	53.0	0.0	0.0	28.0	0.0	0.0	0.0	0.0	0.0	0.0	0.0	0.0	32.0	0.0	0.0	0.0	11.0	66.0	0.0	0.0
OTU 497	30.0	0.0	0.0	0.0	22.0	10.0	0.0	0.0	0.0	9.0	0.0	15.0	18.0	7.0	0.0	7.0	0.0	0.0	0.0	11.0	10.0	9.0	42.0	16.0	36.0	0.0	16.0	10.0	0.0	0.0	0.0
OTU 498	0.0	44.0	0.0	0.0	81.0	0.0	0.0	0.0	0.0	0.0	0.0	0.0	14.0	0.0	0.0	0.0	0.0	0.0	0.0	0.0	0.0	0.0	0.0	36.0	0.0	0.0	38.0	0.0	55.0	0.0	0.0
OTU 499	0.0	8.0	4.0	11.0	35.0	6.0	9.0	7.0	14.0	0.0	0.0	11.0	0.0	0.0	0.0	7.0	0.0	0.0	9.0	0.0	20.0	0.0	10.0	18.0	0.0	42.0	16.0	24.0	8.0	7.0	0.0
OTU 500	0.0	0.0	0.0	0.0	0.0	0.0	38.0	0.0	21.0	0.0	12.0	0.0	0.0	0.0	0.0	9.0	0.0	0.0	0.0	0.0	0.0	0.0	43.0	0.0	44.0	8.0	0.0	91.0	0.0	0.0	0.0
OTU 501	0.0	39.0	0.0	0.0	0.0	0.0	0.0	23.0	0.0	0.0	0.0	0.0	0.0	0.0	0.0	0.0	0.0	0.0	0.0	0.0	98.0	0.0	0.0	0.0	0.0	42.0	0.0	63.0	0.0	0.0	0.0
OTU 502	0.0	0.0	0.0	0.0	22.0	8.0	19.0	9.0	23.0	0.0	0.0	102.0	13.0	0.0	0.0	0.0	7.0	0.0	0.0	0.0	6.0	22.0	14.0	0.0	0.0	20.0	0.0	0.0	0.0	0.0	0.0
OTU 503	11.0	0.0	0.0	10.0	0.0	58.0	0.0	0.0	0.0	0.0	0.0	0.0	0.0	0.0	0.0	68.0	29.0	0.0	0.0	0.0	29.0	0.0	0.0	0.0	0.0	0.0	11.0	0.0	0.0	20.0	28.0
OTU 504	0.0	0.0	0.0	0.0	26.0	0.0	0.0	0.0	85.0	0.0	0.0	0.0	0.0	0.0	0.0	0.0	0.0	0.0	0.0	0.0	0.0	151.0	0.0	0.0	0.0	0.0	0.0	0.0	0.0	0.0	0.0
OTU 505	0.0	0.0	0.0	0.0	0.0	0.0	30.0	6.0	7.0	12.0	14.0	4.0	0.0	5.0	0.0	0.0	0.0	0.0	48.0	6.0	3.0	6.0	0.0	17.0	0.0	38.0	14.0	28.0	0.0	0.0	24.0
OTU 506	0.0	0.0	0.0	0.0	0.0	0.0	0.0	0.0	51.0	77.0	0.0	0.0	0.0	0.0	0.0	0.0	24.0	11.0	0.0	0.0	0.0	0.0	0.0	30.0	18.0	0.0	0.0	51.0	0.0	0.0	0.0
OTU 507	0.0	0.0	0.0	16.0	27.0	0.0	0.0	0.0	0.0	0.0	0.0	0.0	0.0	0.0	0.0	0.0	0.0	0.0	0.0	38.0	0.0	0.0	10.0	0.0	0.0	0.0	57.0	112.0	0.0	0.0	0.0
OTU 508	14.0	0.0	0.0	0.0	0.0	0.0	0.0	0.0	0.0	0.0	30.0	94.0	38.0	0.0	0.0	0.0	0.0	0.0	0.0	0.0	0.0	0.0	0.0	0.0	0.0	0.0	0.0	0.0	0.0	83.0	0.0
OTU 509	9.0	0.0	0.0	0.0	0.0	41.0	0.0	0.0	0.0	0.0	0.0	0.0	20.0	0.0	0.0	0.0	14.0	0.0	0.0	58.0	37.0	0.0	22.0	0.0	0.0	0.0	0.0	0.0	0.0	57.0	0.0
OTU 510	0.0	0.0	0.0	0.0	13.0	16.0	28.0	69.0	0.0	0.0	15.0	13.0	0.0	0.0	0.0	0.0	0.0	0.0	0.0	0.0	0.0	0.0	62.0	0.0	0.0	22.0	0.0	20.0	0.0	0.0	0.0
OTU 511	22.0	109.0	36.0	0.0	18.0	0.0	0.0	0.0	20.0	10.0	0.0	0.0	11.0	0.0	0.0	0.0	0.0	0.0	17.0	0.0	0.0	0.0	14.0	0.0	0.0	0.0	0.0	0.0	0.0	0.0	0.0
OTU 512	0.0	0.0	0.0	0.0	0.0	0.0	0.0	0.0	0.0	0.0	0.0	0.0	0.0	63.0	0.0	0.0	0.0	0.0	0.0	0.0	0.0	0.0	0.0	99.0	0.0	0.0	0.0	58.0	0.0	37.0	0.0
OTU 513	21.0	0.0	0.0	12.0	0.0	0.0	0.0	0.0	0.0	0.0	53.0	0.0	35.0	0.0	0.0	0.0	0.0	84.0	0.0	0.0	51.0	0.0	0.0	0.0	0.0	0.0	0.0	0.0	0.0	0.0	0.0
OTU 514	0.0	0.0	7.0	17.0	21.0	10.0	5.0	0.0	12.0	0.0	3.0	9.0	0.0	10.0	7.0	17.0	0.0	0.0	0.0	0.0	28.0	5.0	15.0	18.0	11.0	24.0	4.0	22.0	0.0	11.0	0.0
OTU 515	0.0	0.0	0.0	0.0	23.0	0.0	26.0	0.0	0.0	0.0	24.0	62.0	0.0	0.0	0.0	0.0	0.0	0.0	0.0	0.0	0.0	0.0	0.0	17.0	0.0	5.0	11.0	35.0	53.0	0.0	0.0
OTU 516	0.0	0.0	0.0	0.0	16.0	0.0	0.0	0.0	0.0	0.0	0.0	58.0	0.0	0.0	41.0	0.0	0.0	0.0	0.0	0.0	0.0	0.0	0.0	0.0	15.0	18.0	29.0	0.0	0.0	24.0	55.0
OTU 517	0.0	0.0	0.0	0.0	0.0	0.0	21.0	9.0	17.0	17.0	12.0	7.0	0.0	12.0	11.0	24.0	0.0	0.0	0.0	13.0	11.0	9.0	0.0	32.0	0.0	9.0	4.0	23.0	0.0	9.0	16.0
OTU 518	0.0	0.0	91.0	0.0	0.0	0.0	0.0	11.0	0.0	0.0	0.0	0.0	18.0	86.0	0.0	0.0	21.0	8.0	0.0	0.0	0.0	0.0	0.0	20.0	0.0	0.0	0.0	0.0	0.0	0.0	0.0
OTU 519	0.0	0.0	0.0	0.0	0.0	0.0	0.0	0.0	0.0	0.0	89.0	0.0	0.0	88.0	0.0	0.0	0.0	0.0	0.0	0.0	0.0	0.0	77.0	0.0	0.0	0.0	0.0	0.0	0.0	0.0	0.0
OTU 520	0.0	0.0	0.0	0.0	0.0	0.0	41.0	0.0	0.0	0.0	38.0	4.0	0.0	122.0	0.0	0.0	0.0	0.0	0.0	0.0	0.0	0.0	0.0	0.0	0.0	26.0	0.0	22.0	0.0	0.0	0.0
OTU 521	0.0	0.0	0.0	0.0	0.0	0.0	0.0	0.0	0.0	0.0	0.0	0.0	0.0	0.0	13.0	0.0	0.0	0.0	0.0	10.0	20.0	10.0	0.0	0.0	0.0	0.0	0.0	0.0	0.0	0.0	200.0
OTU 522	24.0	65.0	0.0	0.0	0.0	0.0	0.0	0.0	0.0	0.0	0.0	0.0	7.0	0.0	0.0	0.0	0.0	0.0	0.0	0.0	15.0	0.0	0.0	16.0	10.0	41.0	0.0	28.0	44.0	0.0	0.0
OTU 523	0.0	9.0	12.0	8.0	35.0	5.0	17.0	3.0	11.0	0.0	0.0	4.0	0.0	0.0	0.0	9.0	0.0	0.0	6.0	0.0	22.0	0.0	13.0	12.0	0.0	44.0	11.0	20.0	8.0	1.0	0.0
OTU 524	0.0	0.0	0.0	0.0	19.0	13.0	19.0	15.0	0.0	71.0	25.0	15.0	0.0	0.0	0.0	0.0	0.0	0.0	0.0	0.0	0.0	0.0	0.0	0.0	0.0	32.0	0.0	41.0	0.0	0.0	0.0
OTU 525	0.0	0.0	0.0	0.0	0.0	0.0	78.0	0.0	0.0	0.0	0.0	0.0	0.0	0.0	0.0	0.0	0.0	0.0	0.0	0.0	0.0	0.0	0.0	0.0	0.0	0.0	123.0	49.0	0.0	0.0	0.0
OTU 526	0.0	0.0	0.0	0.0	0.0	0.0	0.0	0.0	0.0	0.0	0.0	0.0	0.0	0.0	0.0	0.0	0.0	0.0	0.0	0.0	0.0	0.0	0.0	0.0	0.0	132.0	0.0	118.0	0.0	0.0	0.0
OTU 527	30.0	26.0	0.0	28.0	0.0	0.0	0.0	0.0	8.0	0.0	0.0	13.0	6.0	15.0	0.0	0.0	0.0	0.0	0.0	0.0	0.0	0.0	0.0	13.0	31.0	21.0	21.0	21.0	16.0	0.0	0.0
OTU 528	11.0	0.0	0.0	13.0	0.0	0.0	0.0	0.0	63.0	0.0	0.0	0.0	0.0	0.0	0.0	43.0	0.0	37.0	0.0	0.0	0.0	0.0	0.0	0.0	69.0	0.0	13.0	0.0	0.0	0.0	0.0
OTU 529	0.0	0.0	0.0	15.0	28.0	0.0	0.0	44.0	0.0	0.0	0.0	15.0	0.0	0.0	0.0	8.0	0.0	0.0	0.0	0.0	9.0	0.0	25.0	20.0	12.0	40.0	0.0	21.0	0.0	12.0	0.0
OTU 530	0.0	0.0	0.0	15.0	0.0	0.0	32.0	0.0	10.0	21.0	17.0	14.0	24.0	0.0	0.0	0.0	0.0	0.0	0.0	0.0	31.0	0.0	30.0	0.0	34.0	13.0	0.0	8.0	0.0	0.0	0.0
OTU 531	0.0	0.0	0.0	0.0	2.0	0.0	15.0	10.0	12.0	0.0	18.0	0.0	0.0	0.0	21.0	28.0	0.0	0.0	0.0	66.0	14.0	32.0	2.0	3.0	0.0	12.0	0.0	6.0	0.0	7.0	0.0
OTU 532	0.0	0.0	0.0	0.0	0.0	45.0	59.0	0.0	0.0	0.0	0.0	0.0	0.0	0.0	0.0	0.0	0.0	0.0	0.0	0.0	0.0	0.0	51.0	92.0	0.0	0.0	0.0	0.0	0.0	0.0	0.0
OTU 533	0.0	0.0	41.0	0.0	0.0	0.0	0.0	0.0	0.0	0.0	0.0	51.0	0.0	0.0	0.0	0.0	34.0	45.0	0.0	0.0	0.0	0.0	16.0	36.0	23.0	0.0	0.0	0.0	0.0	0.0	0.0
OTU 534	0.0	0.0	0.0	34.0	0.0	24.0	16.0	24.0	0.0	0.0	0.0	0.0	31.0	0.0	0.0	0.0	103.0	0.0	0.0	0.0	0.0	0.0	0.0	0.0	14.0	0.0	0.0	0.0	0.0	0.0	0.0
OTU 535	0.0	0.0	0.0	0.0	0.0	0.0	38.0	0.0	0.0	0.0	51.0	65.0	0.0	0.0	0.0	0.0	0.0	0.0	0.0	73.0	0.0	0.0	0.0	0.0	0.0	0.0	0.0	0.0	0.0	0.0	19.0
OTU 536	0.0	0.0	0.0	0.0	0.0	0.0	0.0	11.0	0.0	0.0	0.0	0.0	14.0	0.0	0.0	0.0	11.0	15.0	0.0	24.0	0.0	0.0	58.0	13.0	0.0	0.0	0.0	0.0	0.0	100.0	0.0
OTU 537	0.0	0.0	0.0	7.0	0.0	0.0	0.0	0.0	46.0	20.0	0.0	0.0	0.0	0.0	15.0	0.0	0.0	0.0	73.0	0.0	0.0	14.0	5.0	15.0	0.0	0.0	50.0	0.0	0.0	0.0	0.0
OTU 538	29.0	64.0	0.0	0.0	56.0	0.0	0.0	0.0	0.0	0.0	0.0	0.0	10.0	0.0	0.0	10.0	15.0	0.0	0.0	5.0	0.0	0.0	0.0	0.0	16.0	26.0	0.0	13.0	0.0	0.0	0.0
OTU 539	0.0	0.0	0.0	30.0	0.0	34.0	0.0	20.0	0.0	0.0	0.0	0.0	23.0	0.0	50.0	14.0	0.0	0.0	0.0	0.0	0.0	0.0	0.0	45.0	0.0	0.0	0.0	28.0	0.0	0.0	0.0
OTU 540	0.0	0.0	0.0	14.0	39.0	13.0	37.0	10.0	15.0	0.0	13.0	0.0	0.0	0.0	0.0	11.0	0.0	0.0	0.0	0.0	0.0	0.0	0.0	7.0	12.0	30.0	0.0	43.0	0.0	0.0	0.0
OTU 541	0.0	0.0	0.0	0.0	0.0	0.0	0.0	0.0	0.0	27.0	74.0	0.0	8.0	0.0	0.0	0.0	0.0	0.0	0.0	0.0	0.0	0.0	0.0	0.0	12.0	66.0	0.0	56.0	0.0	0.0	0.0
OTU 542	22.0	50.0	0.0	19.0	0.0	0.0	0.0	0.0	0.0	0.0	0.0	0.0	0.0	0.0	0.0	10.0	0.0	0.0	0.0	16.0	0.0	0.0	0.0	0.0	0.0	54.0	0.0	25.0	29.0	15.0	0.0
OTU 543	0.0	25.0	0.0	47.0	0.0	0.0	0.0	0.0	0.0	0.0	94.0	0.0	8.0	0.0	0.0	0.0	0.0	0.0	0.0	0.0	0.0	0.0	0.0	0.0	0.0	0.0	0.0	0.0	0.0	66.0	0.0
OTU 544	0.0	16.0	0.0	10.0	0.0	15.0	39.0	0.0	16.0	0.0	0.0	7.0	19.0	0.0	0.0	10.0	0.0	0.0	0.0	0.0	43.0	0.0	9.0	0.0	23.0	13.0	0.0	0.0	0.0	20.0	0.0
OTU 545	0.0	0.0	0.0	77.0	0.0	29.0	0.0	0.0	27.0	0.0	22.0	0.0	0.0	0.0	0.0	9.0	0.0	0.0	34.0	0.0	0.0	0.0	0.0	0.0	31.0	11.0	0.0	0.0	0.0	0.0	0.0
OTU 546	0.0	0.0	0.0	7.0	15.0	0.0	49.0	0.0	15.0	0.0	27.0	9.0	44.0	0.0	0.0	6.0	0.0	0.0	0.0	0.0	7.0	9.0	0.0	0.0	0.0	0.0	34.0	0.0	0.0	18.0	0.0
OTU 547	0.0	0.0	0.0	11.0	21.0	0.0	0.0	0.0	0.0	0.0	0.0	0.0	0.0	40.0	0.0	0.0	0.0	0.0	34.0	0.0	81.0	0.0	11.0	0.0	0.0	41.0	0.0	0.0	0.0	0.0	0.0
OTU 548	94.0	0.0	0.0	0.0	16.0	7.0	27.0	0.0	0.0	0.0	9.0	7.0	0.0	0.0	0.0	0.0	0.0	0.0	0.0	0.0	0.0	0.0	0.0	0.0	0.0	43.0	0.0	34.0	0.0	0.0	0.0
OTU 549	0.0	0.0	0.0	27.0	0.0	0.0	0.0	0.0	0.0	0.0	0.0	0.0	0.0	0.0	0.0	0.0	0.0	0.0	0.0	0.0	0.0	0.0	0.0	0.0	0.0	0.0	38.0	172.0	0.0	0.0	0.0
OTU 550	65.0	78.0	0.0	0.0	0.0	0.0	0.0	0.0	0.0	0.0	0.0	0.0	14.0	0.0	0.0	8.0	0.0	0.0	0.0	11.0	0.0	9.0	0.0	0.0	11.0	23.0	0.0	16.0	0.0	0.0	0.0
OTU 551	25.0	43.0	0.0	0.0	0.0	3.0	0.0	0.0	9.0	3.0	0.0	0.0	0.0	0.0	0.0	0.0	0.0	0.0	0.0	0.0	0.0	0.0	25.0	15.0	24.0	27.0	0.0	45.0	0.0	14.0	0.0
OTU 552	0.0	28.0	0.0	0.0	0.0	18.0	12.0	19.0	48.0	0.0	0.0	0.0	0.0	0.0	0.0	0.0	0.0	0.0	0.0	0.0	13.0	0.0	30.0	0.0	0.0	29.0	0.0	0.0	0.0	36.0	0.0
OTU 553	0.0	0.0	0.0	0.0	0.0	78.0	0.0	0.0	0.0	82.0	0.0	0.0	0.0	0.0	0.0	0.0	0.0	0.0	0.0	0.0	0.0	0.0	0.0	0.0	28.0	0.0	44.0	0.0	0.0	0.0	0.0
OTU 554	19.0	0.0	0.0	41.0	12.0	10.0	0.0	13.0	17.0	0.0	0.0	0.0	0.0	0.0	62.0	31.0	0.0	0.0	0.0	0.0	8.0	0.0	18.0	0.0	0.0	0.0	0.0	0.0	0.0	0.0	0.0
OTU 555	0.0	0.0	0.0	0.0	0.0	0.0	44.0	0.0	0.0	0.0	39.0	0.0	0.0	0.0	0.0	0.0	0.0	0.0	0.0	0.0	0.0	0.0	0.0	0.0	0.0	0.0	104.0	0.0	0.0	0.0	44.0
OTU 556	0.0	0.0	37.0	23.0	0.0	14.0	28.0	29.0	0.0	0.0	15.0	0.0	13.0	0.0	0.0	26.0	0.0	0.0	0.0	0.0	0.0	0.0	0.0	45.0	0.0	0.0	0.0	0.0	0.0	0.0	0.0
OTU 557	11.0	11.0	0.0	19.0	0.0	0.0	0.0	0.0	9.0	0.0	0.0	24.0	16.0	24.0	0.0	0.0	0.0	0.0	0.0	0.0	0.0	0.0	0.0	15.0	39.0	6.0	22.0	11.0	22.0	0.0	0.0
OTU 558	0.0	0.0	0.0	0.0	0.0	28.0	136.0	0.0	0.0	0.0	0.0	0.0	0.0	0.0	0.0	0.0	0.0	0.0	0.0	0.0	0.0	0.0	0.0	0.0	22.0	43.0	0.0	0.0	0.0	0.0	0.0
OTU 559	0.0	0.0	0.0	0.0	0.0	0.0	0.0	0.0	0.0	0.0	0.0	31.0	0.0	0.0	0.0	0.0	0.0	0.0	0.0	0.0	0.0	0.0	0.0	69.0	101.0	28.0	0.0	0.0	0.0	0.0	0.0
OTU 560	0.0	0.0	0.0	48.0	0.0	0.0	0.0	0.0	66.0	0.0	0.0	0.0	0.0	0.0	0.0	90.0	0.0	0.0	0.0	0.0	0.0	24.0	0.0	0.0	0.0	0.0	0.0	0.0	0.0	0.0	0.0
OTU 561	23.0	0.0	0.0	45.0	0.0	0.0	19.0	0.0	0.0	0.0	0.0	0.0	9.0	0.0	0.0	0.0	0.0	0.0	0.0	0.0	0.0	0.0	0.0	51.0	16.0	15.0	0.0	16.0	0.0	33.0	0.0
OTU 562	0.0	0.0	0.0	0.0	19.0	0.0	0.0	0.0	0.0	0.0	0.0	83.0	0.0	58.0	0.0	0.0	0.0	0.0	43.0	0.0	0.0	0.0	0.0	0.0	0.0	0.0	0.0	24.0	0.0	0.0	0.0
OTU 563	0.0	0.0	0.0	0.0	0.0	0.0	0.0	0.0	0.0	0.0	0.0	0.0	0.0	0.0	34.0	0.0	0.0	0.0	0.0	17.0	76.0	0.0	31.0	0.0	0.0	0.0	0.0	0.0	0.0	0.0	69.0
OTU 564	0.0	0.0	0.0	77.0	7.0	6.0	18.0	0.0	0.0	0.0	20.0	8.0	0.0	0.0	0.0	0.0	0.0	0.0	59.0	0.0	0.0	0.0	0.0	0.0	0.0	21.0	0.0	10.0	0.0	0.0	0.0
OTU 565	0.0	0.0	0.0	0.0	18.0	16.0	0.0	0.0	0.0	0.0	0.0	23.0	81.0	83.0	0.0	0.0	0.0	0.0	0.0	0.0	0.0	0.0	0.0	0.0	0.0	0.0	0.0	5.0	0.0	0.0	0.0
OTU 566	52.0	21.0	0.0	0.0	0.0	0.0	0.0	0.0	21.0	12.0	0.0	0.0	0.0	0.0	0.0	7.0	0.0	0.0	0.0	0.0	0.0	0.0	0.0	53.0	30.0	29.0	0.0	0.0	0.0	0.0	0.0
OTU 567	0.0	0.0	0.0	25.0	0.0	0.0	0.0	0.0	75.0	53.0	0.0	0.0	0.0	0.0	31.0	0.0	0.0	0.0	0.0	0.0	0.0	14.0	10.0	16.0	0.0	0.0	0.0	0.0	0.0	0.0	0.0
OTU 568	0.0	0.0	0.0	0.0	0.0	0.0	0.0	62.0	0.0	0.0	0.0	0.0	0.0	0.0	0.0	0.0	0.0	0.0	0.0	0.0	0.0	0.0	38.0	0.0	84.0	0.0	0.0	0.0	0.0	40.0	0.0
OTU 569	0.0	0.0	29.0	0.0	0.0	0.0	0.0	0.0	0.0	0.0	0.0	0.0	0.0	0.0	0.0	0.0	76.0	118.0	0.0	0.0	0.0	0.0	0.0	0.0	0.0	0.0	0.0	0.0	0.0	0.0	0.0
OTU 570	0.0	0.0	0.0	0.0	0.0	0.0	74.0	0.0	0.0	0.0	0.0	11.0	0.0	0.0	0.0	78.0	0.0	0.0	0.0	3.0	0.0	0.0	0.0	0.0	0.0	0.0	0.0	0.0	0.0	20.0	37.0
OTU 571	0.0	0.0	0.0	0.0	0.0	0.0	0.0	0.0	0.0	47.0	96.0	0.0	0.0	0.0	0.0	0.0	0.0	0.0	0.0	0.0	0.0	0.0	0.0	80.0	0.0	0.0	0.0	0.0	0.0	0.0	0.0
OTU 572	0.0	0.0	116.0	0.0	0.0	0.0	0.0	0.0	0.0	0.0	0.0	0.0	0.0	0.0	0.0	0.0	0.0	0.0	0.0	0.0	0.0	0.0	0.0	0.0	0.0	0.0	104.0	0.0	0.0	0.0	0.0
OTU 573	0.0	0.0	0.0	8.0	15.0	0.0	74.0	0.0	0.0	0.0	0.0	0.0	0.0	0.0	0.0	0.0	0.0	0.0	0.0	0.0	0.0	0.0	6.0	0.0	0.0	110.0	0.0	0.0	7.0	0.0	0.0
OTU 574	0.0	0.0	0.0	0.0	23.0	0.0	0.0	54.0	0.0	0.0	0.0	0.0	0.0	0.0	0.0	54.0	0.0	0.0	0.0	64.0	0.0	0.0	0.0	0.0	0.0	8.0	0.0	17.0	0.0	0.0	0.0
OTU 575	0.0	0.0	0.0	0.0	0.0	0.0	0.0	0.0	0.0	0.0	52.0	42.0	0.0	0.0	78.0	0.0	0.0	0.0	0.0	0.0	0.0	0.0	0.0	0.0	0.0	48.0	0.0	0.0	0.0	0.0	0.0
OTU 576	21.0	13.0	0.0	0.0	0.0	10.0	10.0	0.0	10.0	10.0	3.0	0.0	6.0	5.0	0.0	0.0	8.0	5.0	36.0	4.0	0.0	0.0	0.0	27.0	13.0	3.0	0.0	16.0	17.0	0.0	0.0
OTU 577	20.0	13.0	0.0	0.0	0.0	0.0	0.0	0.0	21.0	0.0	17.0	18.0	0.0	20.0	0.0	0.0	0.0	0.0	0.0	0.0	11.0	0.0	0.0	20.0	23.0	0.0	25.0	9.0	20.0	0.0	0.0
OTU 578	0.0	0.0	0.0	0.0	32.0	0.0	0.0	44.0	0.0	0.0	0.0	61.0	0.0	0.0	0.0	0.0	0.0	0.0	0.0	65.0	0.0	0.0	0.0	0.0	0.0	0.0	0.0	15.0	0.0	0.0	0.0
OTU 579	0.0	0.0	0.0	0.0	0.0	0.0	0.0	0.0	0.0	0.0	37.0	0.0	0.0	44.0	36.0	0.0	0.0	0.0	0.0	0.0	0.0	0.0	0.0	0.0	0.0	20.0	13.0	30.0	0.0	31.0	6.0
OTU 580	0.0	0.0	31.0	0.0	0.0	0.0	0.0	0.0	47.0	0.0	0.0	0.0	0.0	0.0	0.0	0.0	27.0	15.0	0.0	0.0	0.0	0.0	31.0	33.0	31.0	0.0	0.0	0.0	0.0	0.0	0.0
OTU 581	0.0	0.0	0.0	0.0	0.0	0.0	0.0	20.0	0.0	0.0	0.0	0.0	16.0	0.0	0.0	0.0	11.0	13.0	0.0	53.0	0.0	0.0	0.0	25.0	77.0	0.0	0.0	0.0	0.0	0.0	0.0
OTU 582	19.0	0.0	0.0	9.0	0.0	24.0	0.0	27.0	0.0	19.0	0.0	0.0	6.0	0.0	9.0	7.0	12.0	20.0	0.0	15.0	0.0	0.0	0.0	0.0	8.0	27.0	0.0	12.0	0.0	0.0	0.0
OTU 583	0.0	0.0	0.0	4.0	0.0	0.0	0.0	0.0	0.0	0.0	0.0	40.0	0.0	0.0	52.0	0.0	0.0	0.0	0.0	0.0	69.0	0.0	0.0	0.0	0.0	0.0	0.0	0.0	0.0	17.0	32.0
OTU 584	0.0	0.0	0.0	20.0	0.0	0.0	0.0	0.0	0.0	24.0	101.0	24.0	0.0	0.0	0.0	0.0	0.0	0.0	0.0	0.0	0.0	0.0	44.0	0.0	0.0	0.0	0.0	0.0	0.0	0.0	0.0
OTU 585	0.0	0.0	0.0	8.0	15.0	0.0	0.0	0.0	14.0	0.0	0.0	7.0	0.0	0.0	0.0	0.0	0.0	0.0	0.0	0.0	18.0	0.0	33.0	16.0	60.0	28.0	0.0	13.0	0.0	0.0	0.0
OTU 586	0.0	0.0	0.0	6.0	13.0	0.0	38.0	0.0	0.0	0.0	0.0	14.0	10.0	0.0	0.0	9.0	11.0	18.0	0.0	0.0	0.0	0.0	0.0	9.0	0.0	25.0	0.0	16.0	43.0	0.0	0.0
OTU 587	60.0	0.0	0.0	0.0	66.0	0.0	0.0	0.0	0.0	0.0	0.0	0.0	0.0	0.0	0.0	0.0	0.0	0.0	0.0	0.0	0.0	0.0	0.0	0.0	0.0	85.0	0.0	0.0	0.0	0.0	0.0
OTU 588	8.0	0.0	0.0	19.0	19.0	0.0	0.0	0.0	0.0	0.0	0.0	0.0	23.0	0.0	0.0	0.0	0.0	0.0	0.0	0.0	0.0	0.0	18.0	52.0	72.0	0.0	0.0	0.0	0.0	0.0	0.0
OTU 589	0.0	0.0	0.0	0.0	0.0	0.0	112.0	21.0	0.0	0.0	0.0	0.0	0.0	0.0	7.0	0.0	0.0	0.0	0.0	29.0	0.0	0.0	0.0	0.0	0.0	0.0	42.0	0.0	0.0	0.0	0.0
OTU 590	0.0	0.0	0.0	0.0	0.0	0.0	0.0	14.0	58.0	0.0	0.0	0.0	0.0	0.0	0.0	0.0	0.0	0.0	0.0	0.0	88.0	14.0	0.0	0.0	0.0	0.0	12.0	0.0	0.0	0.0	25.0
OTU 591	0.0	0.0	0.0	0.0	0.0	37.0	0.0	13.0	44.0	0.0	0.0	0.0	23.0	0.0	0.0	0.0	16.0	12.0	0.0	13.0	0.0	0.0	31.0	21.0	0.0	0.0	0.0	0.0	0.0	0.0	0.0
OTU 592	0.0	0.0	27.0	0.0	0.0	0.0	82.0	0.0	0.0	0.0	0.0	22.0	0.0	0.0	0.0	0.0	0.0	0.0	0.0	50.0	0.0	0.0	0.0	0.0	0.0	0.0	28.0	0.0	0.0	0.0	0.0
OTU 593	0.0	0.0	0.0	23.0	9.0	0.0	0.0	59.0	0.0	0.0	0.0	0.0	0.0	0.0	0.0	0.0	0.0	0.0	14.0	0.0	0.0	0.0	0.0	11.0	0.0	8.0	34.0	9.0	0.0	0.0	42.0
OTU 594	0.0	0.0	0.0	0.0	0.0	0.0	20.0	2.0	27.0	0.0	11.0	0.0	0.0	0.0	13.0	17.0	0.0	0.0	0.0	47.0	9.0	24.0	7.0	2.0	0.0	12.0	0.0	6.0	0.0	12.0	0.0
OTU 595	109.0	83.0	0.0	0.0	0.0	0.0	0.0	0.0	0.0	0.0	0.0	0.0	0.0	0.0	0.0	0.0	0.0	0.0	0.0	0.0	0.0	0.0	0.0	16.0	0.0	0.0	0.0	0.0	0.0	0.0	0.0
OTU 596	0.0	0.0	0.0	26.0	0.0	0.0	0.0	0.0	0.0	0.0	0.0	0.0	0.0	0.0	0.0	0.0	0.0	0.0	0.0	0.0	47.0	0.0	45.0	0.0	0.0	0.0	0.0	0.0	0.0	90.0	0.0
OTU 597	0.0	0.0	0.0	0.0	0.0	11.0	36.0	0.0	0.0	0.0	26.0	11.0	0.0	0.0	0.0	0.0	0.0	0.0	0.0	0.0	55.0	0.0	0.0	0.0	28.0	21.0	0.0	20.0	0.0	0.0	0.0
OTU 598	0.0	0.0	0.0	88.0	0.0	0.0	0.0	0.0	0.0	0.0	0.0	0.0	0.0	0.0	0.0	0.0	0.0	0.0	0.0	0.0	0.0	0.0	51.0	0.0	0.0	0.0	0.0	67.0	0.0	0.0	0.0
OTU 599	0.0	0.0	0.0	0.0	32.0	0.0	0.0	0.0	0.0	0.0	0.0	0.0	0.0	0.0	0.0	0.0	0.0	0.0	48.0	0.0	29.0	0.0	0.0	0.0	97.0	0.0	0.0	0.0	0.0	0.0	0.0
OTU 600	0.0	0.0	0.0	0.0	22.0	0.0	0.0	0.0	23.0	0.0	0.0	0.0	0.0	0.0	0.0	0.0	0.0	0.0	0.0	0.0	0.0	0.0	0.0	69.0	0.0	51.0	0.0	41.0	0.0	0.0	0.0
OTU 601	0.0	0.0	0.0	0.0	0.0	0.0	0.0	0.0	0.0	206.0	0.0	0.0	0.0	0.0	0.0	0.0	0.0	0.0	0.0	0.0	0.0	0.0	0.0	0.0	0.0	0.0	0.0	0.0	0.0	0.0	0.0
OTU 602	0.0	0.0	0.0	0.0	0.0	0.0	0.0	0.0	0.0	127.0	0.0	0.0	0.0	0.0	0.0	0.0	0.0	0.0	0.0	0.0	0.0	0.0	0.0	0.0	0.0	8.0	0.0	0.0	0.0	71.0	0.0
OTU 603	21.0	51.0	0.0	10.0	0.0	0.0	61.0	0.0	20.0	0.0	0.0	0.0	0.0	0.0	0.0	7.0	0.0	0.0	0.0	0.0	0.0	0.0	0.0	0.0	0.0	0.0	0.0	0.0	22.0	13.0	0.0
OTU 604	0.0	32.0	0.0	17.0	0.0	19.0	0.0	0.0	47.0	0.0	0.0	29.0	0.0	0.0	0.0	12.0	0.0	0.0	0.0	0.0	0.0	0.0	0.0	0.0	0.0	0.0	0.0	0.0	20.0	29.0	0.0
OTU 605	0.0	0.0	0.0	0.0	14.0	0.0	0.0	0.0	86.0	0.0	0.0	34.0	0.0	0.0	0.0	0.0	0.0	0.0	0.0	0.0	0.0	59.0	0.0	0.0	12.0	0.0	0.0	0.0	0.0	0.0	0.0
OTU 606	0.0	0.0	0.0	32.0	0.0	0.0	0.0	0.0	0.0	0.0	0.0	0.0	0.0	98.0	0.0	0.0	0.0	49.0	0.0	0.0	0.0	0.0	0.0	0.0	25.0	0.0	0.0	0.0	0.0	0.0	0.0
OTU 607	0.0	0.0	0.0	12.0	0.0	47.0	30.0	0.0	0.0	0.0	0.0	0.0	0.0	0.0	10.0	0.0	0.0	0.0	0.0	0.0	0.0	0.0	0.0	28.0	0.0	21.0	32.0	23.0	0.0	0.0	0.0
OTU 608	29.0	38.0	0.0	22.0	0.0	0.0	20.0	0.0	0.0	0.0	0.0	0.0	31.0	0.0	0.0	0.0	0.0	0.0	0.0	0.0	0.0	0.0	17.0	45.0	0.0	0.0	0.0	0.0	0.0	0.0	0.0
OTU 609	0.0	112.0	0.0	0.0	0.0	0.0	0.0	0.0	0.0	0.0	2.0	0.0	0.0	0.0	0.0	0.0	0.0	0.0	0.0	0.0	0.0	0.0	0.0	0.0	0.0	31.0	20.0	37.0	0.0	0.0	0.0
OTU 610	0.0	0.0	23.0	0.0	0.0	16.0	0.0	0.0	0.0	0.0	0.0	0.0	8.0	43.0	0.0	0.0	0.0	0.0	0.0	0.0	0.0	0.0	0.0	0.0	0.0	0.0	0.0	0.0	0.0	112.0	0.0
OTU 611	0.0	0.0	0.0	15.0	0.0	0.0	0.0	0.0	0.0	0.0	45.0	117.0	0.0	0.0	0.0	0.0	0.0	0.0	0.0	0.0	11.0	0.0	0.0	0.0	0.0	0.0	9.0	0.0	0.0	0.0	5.0
OTU 612	0.0	0.0	0.0	0.0	15.0	0.0	0.0	0.0	0.0	0.0	82.0	0.0	0.0	0.0	0.0	0.0	0.0	0.0	0.0	0.0	0.0	0.0	0.0	0.0	0.0	69.0	0.0	0.0	0.0	0.0	36.0
OTU 613	0.0	0.0	0.0	0.0	0.0	0.0	0.0	0.0	30.0	14.0	0.0	0.0	0.0	41.0	0.0	0.0	0.0	0.0	0.0	0.0	14.0	36.0	30.0	37.0	0.0	0.0	0.0	0.0	0.0	0.0	0.0
OTU 614	48.0	29.0	0.0	0.0	0.0	0.0	0.0	0.0	0.0	0.0	0.0	0.0	18.0	0.0	0.0	0.0	13.0	15.0	0.0	0.0	0.0	0.0	0.0	0.0	0.0	0.0	30.0	0.0	48.0	0.0	0.0
OTU 615	11.0	0.0	0.0	0.0	19.0	0.0	0.0	0.0	0.0	0.0	0.0	0.0	18.0	59.0	0.0	0.0	0.0	74.0	0.0	0.0	0.0	0.0	20.0	0.0	0.0	0.0	0.0	0.0	0.0	0.0	0.0
OTU 616	0.0	0.0	0.0	0.0	3.0	0.0	0.0	0.0	0.0	0.0	0.0	0.0	0.0	13.0	0.0	0.0	0.0	0.0	0.0	0.0	0.0	0.0	10.0	0.0	101.0	0.0	0.0	0.0	0.0	74.0	0.0
OTU 617	0.0	0.0	0.0	0.0	0.0	0.0	0.0	0.0	0.0	0.0	0.0	48.0	0.0	33.0	0.0	0.0	0.0	0.0	31.0	0.0	0.0	0.0	55.0	0.0	0.0	0.0	0.0	0.0	0.0	34.0	0.0
OTU 618	0.0	0.0	0.0	0.0	0.0	0.0	45.0	0.0	0.0	0.0	59.0	30.0	0.0	0.0	43.0	0.0	0.0	0.0	0.0	0.0	0.0	0.0	0.0	0.0	0.0	0.0	0.0	0.0	0.0	0.0	23.0
OTU 619	0.0	0.0	13.0	6.0	11.0	0.0	27.0	0.0	0.0	0.0	15.0	0.0	0.0	0.0	0.0	7.0	0.0	0.0	0.0	9.0	6.0	8.0	0.0	0.0	0.0	10.0	16.0	50.0	0.0	21.0	0.0
OTU 620	0.0	0.0	0.0	11.0	0.0	0.0	12.0	0.0	0.0	0.0	0.0	0.0	0.0	21.0	0.0	0.0	0.0	0.0	67.0	0.0	0.0	0.0	0.0	0.0	0.0	0.0	0.0	0.0	0.0	63.0	25.0
OTU 621	0.0	0.0	0.0	10.0	11.0	55.0	0.0	0.0	6.0	0.0	0.0	0.0	0.0	60.0	0.0	0.0	0.0	0.0	0.0	0.0	0.0	0.0	21.0	0.0	0.0	0.0	0.0	0.0	0.0	36.0	0.0
OTU 622	86.0	106.0	0.0	0.0	0.0	0.0	0.0	0.0	5.0	0.0	0.0	0.0	0.0	0.0	0.0	0.0	0.0	0.0	0.0	0.0	0.0	0.0	0.0	0.0	0.0	0.0	0.0	0.0	0.0	0.0	0.0
OTU 623	0.0	0.0	0.0	0.0	0.0	0.0	0.0	0.0	0.0	0.0	34.0	0.0	0.0	0.0	0.0	0.0	0.0	0.0	0.0	0.0	0.0	0.0	0.0	0.0	57.0	51.0	0.0	55.0	0.0	0.0	0.0
OTU 624	28.0	0.0	0.0	0.0	0.0	0.0	31.0	0.0	68.0	0.0	0.0	0.0	22.0	0.0	0.0	0.0	0.0	0.0	0.0	0.0	0.0	0.0	0.0	0.0	47.0	0.0	0.0	0.0	0.0	0.0	0.0
OTU 625	0.0	0.0	0.0	0.0	0.0	0.0	0.0	0.0	0.0	0.0	0.0	0.0	0.0	0.0	0.0	83.0	0.0	0.0	0.0	0.0	0.0	0.0	0.0	0.0	0.0	0.0	0.0	0.0	0.0	51.0	62.0
OTU 626	0.0	0.0	0.0	12.0	0.0	0.0	0.0	0.0	0.0	0.0	0.0	0.0	0.0	0.0	0.0	66.0	0.0	0.0	0.0	0.0	17.0	0.0	43.0	0.0	0.0	0.0	27.0	0.0	0.0	29.0	0.0
OTU 627	0.0	0.0	0.0	0.0	30.0	0.0	0.0	0.0	0.0	0.0	0.0	0.0	0.0	0.0	0.0	0.0	0.0	0.0	0.0	52.0	0.0	0.0	12.0	0.0	0.0	0.0	0.0	0.0	0.0	99.0	0.0
OTU 628	0.0	0.0	0.0	0.0	11.0	0.0	0.0	0.0	10.0	51.0	14.0	0.0	19.0	0.0	0.0	0.0	6.0	0.0	0.0	0.0	0.0	36.0	0.0	0.0	7.0	17.0	0.0	22.0	0.0	0.0	0.0
OTU 629	0.0	0.0	0.0	7.0	4.0	17.0	6.0	0.0	0.0	8.0	6.0	9.0	13.0	0.0	0.0	0.0	22.0	18.0	0.0	0.0	6.0	7.0	13.0	25.0	5.0	16.0	0.0	0.0	10.0	0.0	0.0
OTU 630	0.0	0.0	0.0	0.0	0.0	0.0	0.0	0.0	0.0	0.0	0.0	24.0	0.0	38.0	0.0	0.0	0.0	0.0	0.0	0.0	29.0	0.0	77.0	0.0	0.0	0.0	24.0	0.0	0.0	0.0	0.0
OTU 631	0.0	0.0	0.0	0.0	0.0	0.0	0.0	0.0	0.0	0.0	0.0	30.0	0.0	21.0	114.0	0.0	0.0	0.0	0.0	0.0	0.0	0.0	0.0	0.0	0.0	0.0	26.0	0.0	0.0	0.0	0.0
OTU 632	18.0	64.0	0.0	32.0	0.0	33.0	0.0	0.0	0.0	0.0	0.0	0.0	0.0	0.0	0.0	0.0	0.0	0.0	0.0	0.0	0.0	0.0	0.0	0.0	17.0	0.0	0.0	0.0	7.0	19.0	0.0
OTU 633	0.0	0.0	0.0	0.0	0.0	0.0	0.0	0.0	0.0	0.0	0.0	0.0	0.0	51.0	0.0	0.0	0.0	0.0	0.0	0.0	0.0	0.0	0.0	0.0	0.0	139.0	0.0	0.0	0.0	0.0	0.0
OTU 634	0.0	14.0	6.0	7.0	22.0	5.0	3.0	0.0	6.0	0.0	0.0	18.0	0.0	0.0	0.0	6.0	0.0	0.0	2.0	0.0	11.0	0.0	6.0	14.0	0.0	28.0	6.0	29.0	6.0	0.0	0.0
OTU 635	0.0	0.0	0.0	0.0	32.0	0.0	0.0	24.0	0.0	0.0	0.0	0.0	0.0	0.0	0.0	0.0	0.0	0.0	0.0	0.0	0.0	0.0	0.0	0.0	42.0	0.0	0.0	91.0	0.0	0.0	0.0
OTU 636	0.0	0.0	0.0	0.0	10.0	0.0	0.0	21.0	0.0	0.0	0.0	0.0	0.0	0.0	0.0	0.0	0.0	0.0	0.0	0.0	0.0	0.0	0.0	0.0	38.0	44.0	0.0	76.0	0.0	0.0	0.0
OTU 637	0.0	0.0	0.0	0.0	0.0	0.0	0.0	21.0	53.0	0.0	0.0	0.0	0.0	0.0	20.0	0.0	0.0	0.0	0.0	35.0	0.0	60.0	0.0	0.0	0.0	0.0	0.0	0.0	0.0	0.0	0.0
OTU 638	111.0	62.0	0.0	0.0	15.0	0.0	0.0	0.0	0.0	0.0	0.0	0.0	0.0	0.0	0.0	0.0	0.0	0.0	0.0	0.0	0.0	0.0	0.0	0.0	0.0	0.0	0.0	0.0	0.0	0.0	0.0
OTU 639	0.0	0.0	0.0	0.0	0.0	0.0	0.0	0.0	0.0	33.0	0.0	65.0	0.0	0.0	0.0	0.0	0.0	0.0	0.0	0.0	0.0	0.0	0.0	90.0	0.0	0.0	0.0	0.0	0.0	0.0	0.0
OTU 640	0.0	0.0	0.0	0.0	0.0	0.0	0.0	0.0	0.0	13.0	0.0	0.0	0.0	0.0	0.0	0.0	85.0	66.0	0.0	0.0	0.0	0.0	0.0	0.0	24.0	0.0	0.0	0.0	0.0	0.0	0.0
OTU 641	0.0	0.0	0.0	0.0	0.0	62.0	0.0	0.0	69.0	0.0	0.0	0.0	13.0	0.0	0.0	0.0	0.0	0.0	0.0	0.0	0.0	0.0	0.0	0.0	14.0	16.0	0.0	13.0	0.0	0.0	0.0
OTU 642	0.0	0.0	0.0	0.0	0.0	0.0	29.0	0.0	8.0	21.0	0.0	0.0	0.0	0.0	0.0	0.0	0.0	0.0	0.0	0.0	43.0	28.0	49.0	0.0	0.0	0.0	0.0	9.0	0.0	0.0	0.0
OTU 643	0.0	0.0	0.0	0.0	0.0	0.0	24.0	13.0	11.0	0.0	24.0	12.0	0.0	9.0	0.0	22.0	0.0	0.0	0.0	16.0	12.0	23.0	0.0	0.0	0.0	0.0	0.0	0.0	0.0	6.0	15.0
OTU 644	0.0	0.0	0.0	0.0	0.0	0.0	0.0	0.0	0.0	0.0	57.0	0.0	0.0	0.0	0.0	0.0	0.0	0.0	0.0	0.0	0.0	0.0	0.0	0.0	0.0	43.0	0.0	87.0	0.0	0.0	0.0
OTU 645	0.0	0.0	0.0	0.0	0.0	0.0	0.0	0.0	0.0	0.0	23.0	0.0	0.0	0.0	0.0	0.0	0.0	0.0	0.0	0.0	88.0	0.0	0.0	0.0	76.0	0.0	0.0	0.0	0.0	0.0	0.0
OTU 646	0.0	0.0	0.0	0.0	0.0	0.0	0.0	0.0	0.0	0.0	0.0	0.0	0.0	0.0	0.0	0.0	0.0	0.0	0.0	55.0	0.0	0.0	113.0	0.0	0.0	0.0	2.0	0.0	0.0	17.0	0.0
OTU 647	0.0	0.0	43.0	0.0	0.0	0.0	0.0	0.0	0.0	26.0	0.0	0.0	0.0	43.0	0.0	0.0	0.0	0.0	0.0	0.0	0.0	0.0	74.0	0.0	0.0	0.0	0.0	0.0	0.0	0.0	0.0
OTU 648	0.0	0.0	0.0	0.0	109.0	0.0	0.0	0.0	0.0	28.0	0.0	0.0	0.0	0.0	0.0	0.0	0.0	0.0	0.0	0.0	0.0	0.0	0.0	0.0	0.0	49.0	0.0	0.0	0.0	0.0	0.0
OTU 649	0.0	0.0	0.0	0.0	61.0	0.0	0.0	0.0	0.0	0.0	14.0	0.0	0.0	0.0	47.0	0.0	0.0	0.0	0.0	0.0	0.0	0.0	0.0	0.0	0.0	18.0	24.0	22.0	0.0	0.0	0.0
OTU 650	0.0	0.0	0.0	102.0	0.0	0.0	0.0	0.0	0.0	0.0	0.0	0.0	0.0	0.0	0.0	0.0	0.0	0.0	0.0	0.0	0.0	0.0	0.0	0.0	0.0	0.0	0.0	83.0	0.0	0.0	0.0
OTU 651	0.0	0.0	0.0	9.0	13.0	52.0	22.0	0.0	0.0	0.0	15.0	10.0	0.0	0.0	0.0	9.0	0.0	0.0	0.0	6.0	10.0	0.0	0.0	0.0	0.0	0.0	17.0	0.0	0.0	22.0	0.0
OTU 652	7.0	32.0	0.0	0.0	0.0	32.0	0.0	0.0	0.0	0.0	0.0	48.0	34.0	0.0	0.0	0.0	0.0	0.0	0.0	0.0	0.0	0.0	0.0	0.0	0.0	0.0	0.0	0.0	31.0	0.0	0.0
OTU 653	0.0	0.0	13.0	0.0	27.0	0.0	0.0	0.0	27.0	0.0	0.0	0.0	0.0	0.0	0.0	0.0	0.0	0.0	0.0	0.0	0.0	0.0	0.0	0.0	0.0	38.0	61.0	18.0	0.0	0.0	0.0
OTU 654	0.0	0.0	0.0	0.0	0.0	0.0	0.0	0.0	0.0	0.0	0.0	0.0	0.0	0.0	95.0	0.0	0.0	0.0	0.0	0.0	0.0	0.0	0.0	0.0	0.0	0.0	0.0	0.0	0.0	88.0	0.0
OTU 655	0.0	0.0	0.0	0.0	0.0	0.0	0.0	0.0	0.0	0.0	0.0	0.0	0.0	0.0	0.0	0.0	0.0	0.0	0.0	0.0	0.0	0.0	0.0	0.0	0.0	106.0	0.0	77.0	0.0	0.0	0.0
OTU 656	0.0	0.0	19.0	0.0	14.0	0.0	0.0	27.0	0.0	0.0	0.0	0.0	0.0	34.0	0.0	0.0	0.0	0.0	0.0	0.0	0.0	0.0	0.0	0.0	28.0	19.0	0.0	41.0	0.0	0.0	0.0
OTU 657	0.0	0.0	0.0	33.0	7.0	0.0	0.0	60.0	0.0	0.0	0.0	0.0	0.0	0.0	0.0	0.0	0.0	0.0	13.0	0.0	0.0	0.0	0.0	18.0	0.0	0.0	17.0	0.0	0.0	0.0	34.0
OTU 658	0.0	0.0	0.0	2.0	9.0	13.0	11.0	0.0	0.0	5.0	14.0	9.0	15.0	0.0	0.0	0.0	17.0	14.0	0.0	0.0	4.0	6.0	10.0	27.0	6.0	6.0	0.0	0.0	14.0	0.0	0.0
OTU 659	0.0	0.0	0.0	0.0	0.0	14.0	62.0	0.0	0.0	40.0	0.0	0.0	0.0	0.0	0.0	0.0	0.0	0.0	0.0	0.0	0.0	0.0	0.0	0.0	0.0	66.0	0.0	0.0	0.0	0.0	0.0
OTU 660	0.0	0.0	0.0	0.0	0.0	13.0	38.0	0.0	0.0	17.0	7.0	0.0	43.0	47.0	0.0	8.0	0.0	9.0	0.0	0.0	0.0	0.0	0.0	0.0	0.0	0.0	0.0	0.0	0.0	0.0	0.0
OTU 661	0.0	0.0	0.0	0.0	0.0	0.0	31.0	0.0	0.0	0.0	0.0	0.0	6.0	0.0	0.0	0.0	0.0	0.0	0.0	0.0	0.0	0.0	62.0	0.0	12.0	36.0	0.0	35.0	0.0	0.0	0.0
OTU 662	0.0	0.0	0.0	0.0	0.0	0.0	0.0	0.0	0.0	0.0	0.0	41.0	0.0	0.0	88.0	0.0	0.0	0.0	53.0	0.0	0.0	0.0	0.0	0.0	0.0	0.0	0.0	0.0	0.0	0.0	0.0
OTU 663	0.0	0.0	0.0	0.0	0.0	0.0	0.0	0.0	0.0	0.0	0.0	0.0	0.0	0.0	0.0	0.0	0.0	82.0	0.0	0.0	0.0	100.0	0.0	0.0	0.0	0.0	0.0	0.0	0.0	0.0	0.0
OTU 664	47.0	0.0	0.0	0.0	0.0	0.0	109.0	0.0	0.0	0.0	0.0	0.0	12.0	0.0	0.0	0.0	0.0	0.0	0.0	0.0	0.0	0.0	0.0	0.0	13.0	0.0	0.0	0.0	0.0	0.0	0.0
OTU 665	23.0	0.0	0.0	0.0	0.0	0.0	0.0	0.0	0.0	0.0	0.0	0.0	20.0	0.0	0.0	0.0	0.0	0.0	0.0	0.0	0.0	0.0	98.0	40.0	0.0	0.0	0.0	0.0	0.0	0.0	0.0
OTU 666	0.0	0.0	0.0	0.0	0.0	29.0	0.0	0.0	0.0	0.0	0.0	74.0	0.0	0.0	21.0	0.0	0.0	0.0	0.0	0.0	0.0	57.0	0.0	0.0	0.0	0.0	0.0	0.0	0.0	0.0	0.0
OTU 667	0.0	0.0	0.0	0.0	0.0	0.0	0.0	0.0	0.0	0.0	0.0	0.0	0.0	0.0	0.0	0.0	0.0	0.0	0.0	0.0	0.0	0.0	0.0	0.0	0.0	77.0	0.0	104.0	0.0	0.0	0.0
OTU 668	0.0	0.0	0.0	0.0	19.0	0.0	67.0	0.0	0.0	57.0	0.0	0.0	0.0	0.0	0.0	0.0	0.0	0.0	0.0	0.0	0.0	0.0	0.0	0.0	37.0	0.0	0.0	0.0	0.0	0.0	0.0
OTU 669	0.0	0.0	25.0	103.0	18.0	0.0	0.0	0.0	0.0	0.0	0.0	0.0	0.0	0.0	0.0	0.0	0.0	0.0	0.0	0.0	0.0	0.0	0.0	0.0	33.0	0.0	0.0	0.0	0.0	0.0	0.0
OTU 670	0.0	0.0	0.0	0.0	0.0	0.0	95.0	0.0	0.0	0.0	0.0	0.0	0.0	0.0	0.0	0.0	0.0	0.0	0.0	0.0	0.0	0.0	0.0	0.0	0.0	0.0	55.0	0.0	0.0	0.0	29.0
OTU 671	0.0	0.0	0.0	0.0	0.0	0.0	83.0	0.0	0.0	0.0	96.0	0.0	0.0	0.0	0.0	0.0	0.0	0.0	0.0	0.0	0.0	0.0	0.0	0.0	0.0	0.0	0.0	0.0	0.0	0.0	0.0
OTU 672	0.0	0.0	0.0	0.0	0.0	0.0	0.0	0.0	39.0	22.0	0.0	0.0	0.0	0.0	11.0	0.0	0.0	0.0	0.0	10.0	23.0	6.0	14.0	19.0	21.0	0.0	14.0	0.0	0.0	0.0	0.0
OTU 673	0.0	0.0	0.0	0.0	0.0	0.0	0.0	0.0	35.0	0.0	0.0	18.0	40.0	0.0	0.0	0.0	0.0	0.0	0.0	0.0	0.0	0.0	0.0	0.0	32.0	0.0	0.0	0.0	0.0	54.0	0.0
OTU 674	0.0	0.0	0.0	20.0	12.0	30.0	0.0	0.0	11.0	16.0	0.0	0.0	35.0	0.0	0.0	0.0	0.0	0.0	5.0	43.0	0.0	0.0	0.0	6.0	0.0	0.0	0.0	0.0	0.0	0.0	0.0
OTU 675	0.0	0.0	0.0	0.0	0.0	0.0	0.0	0.0	0.0	0.0	0.0	46.0	0.0	0.0	0.0	36.0	0.0	0.0	0.0	0.0	56.0	0.0	0.0	0.0	0.0	0.0	0.0	0.0	0.0	21.0	19.0
OTU 676	0.0	0.0	0.0	0.0	5.0	56.0	0.0	0.0	0.0	0.0	0.0	0.0	96.0	16.0	0.0	0.0	0.0	0.0	0.0	0.0	0.0	0.0	3.0	0.0	0.0	0.0	0.0	0.0	0.0	0.0	0.0
OTU 677	0.0	0.0	0.0	0.0	0.0	0.0	0.0	0.0	89.0	0.0	0.0	0.0	0.0	0.0	0.0	0.0	0.0	0.0	0.0	0.0	0.0	87.0	0.0	0.0	0.0	0.0	0.0	0.0	0.0	0.0	0.0
OTU 678	0.0	0.0	0.0	0.0	0.0	0.0	0.0	0.0	0.0	0.0	0.0	0.0	0.0	0.0	0.0	0.0	0.0	0.0	0.0	0.0	0.0	0.0	0.0	25.0	77.0	74.0	0.0	0.0	0.0	0.0	0.0
OTU 679	0.0	0.0	0.0	0.0	0.0	0.0	0.0	11.0	0.0	0.0	0.0	0.0	9.0	0.0	0.0	0.0	10.0	6.0	0.0	0.0	95.0	0.0	0.0	14.0	0.0	0.0	0.0	29.0	0.0	0.0	0.0
OTU 680	0.0	0.0	0.0	0.0	0.0	0.0	0.0	0.0	0.0	0.0	0.0	0.0	0.0	0.0	0.0	0.0	0.0	0.0	0.0	0.0	0.0	0.0	0.0	0.0	107.0	67.0	0.0	0.0	0.0	0.0	0.0
OTU 681	0.0	0.0	0.0	15.0	11.0	0.0	0.0	35.0	0.0	0.0	0.0	0.0	0.0	0.0	0.0	0.0	0.0	0.0	9.0	0.0	0.0	0.0	0.0	16.0	0.0	14.0	14.0	8.0	0.0	0.0	51.0
OTU 682	0.0	0.0	0.0	0.0	118.0	0.0	0.0	0.0	0.0	0.0	0.0	0.0	0.0	0.0	0.0	0.0	0.0	0.0	0.0	0.0	0.0	0.0	0.0	0.0	55.0	0.0	0.0	0.0	0.0	0.0	0.0
OTU 683	12.0	0.0	0.0	54.0	8.0	0.0	0.0	0.0	0.0	0.0	0.0	64.0	12.0	0.0	0.0	0.0	11.0	0.0	0.0	0.0	0.0	0.0	11.0	0.0	0.0	0.0	0.0	0.0	0.0	0.0	0.0
OTU 684	6.0	0.0	0.0	0.0	11.0	0.0	0.0	0.0	0.0	0.0	29.0	27.0	8.0	0.0	26.0	0.0	0.0	0.0	0.0	0.0	0.0	0.0	0.0	0.0	4.0	17.0	10.0	0.0	0.0	5.0	29.0
OTU 685	0.0	0.0	0.0	0.0	0.0	35.0	0.0	0.0	14.0	27.0	18.0	0.0	0.0	28.0	0.0	0.0	0.0	0.0	34.0	0.0	0.0	9.0	0.0	0.0	0.0	0.0	0.0	7.0	0.0	0.0	0.0
OTU 686	14.0	62.0	0.0	17.0	0.0	33.0	0.0	0.0	0.0	0.0	0.0	0.0	0.0	0.0	0.0	0.0	10.0	0.0	0.0	0.0	0.0	0.0	0.0	0.0	24.0	0.0	0.0	0.0	7.0	4.0	0.0
OTU 687	0.0	0.0	28.0	0.0	0.0	0.0	0.0	0.0	0.0	0.0	0.0	0.0	122.0	0.0	21.0	0.0	0.0	0.0	0.0	0.0	0.0	0.0	0.0	0.0	0.0	0.0	0.0	0.0	0.0	0.0	0.0
OTU 688	0.0	0.0	0.0	21.0	16.0	54.0	0.0	0.0	9.0	0.0	8.0	0.0	25.0	0.0	0.0	0.0	0.0	10.0	0.0	0.0	9.0	0.0	0.0	0.0	11.0	0.0	0.0	8.0	0.0	0.0	0.0
OTU 689	22.0	31.0	0.0	20.0	0.0	19.0	0.0	0.0	10.0	0.0	0.0	11.0	16.0	0.0	0.0	12.0	0.0	0.0	0.0	6.0	0.0	0.0	9.0	0.0	7.0	0.0	0.0	0.0	0.0	7.0	0.0
OTU 690	17.0	0.0	0.0	50.0	0.0	0.0	0.0	0.0	0.0	0.0	0.0	0.0	56.0	0.0	0.0	0.0	0.0	0.0	0.0	47.0	0.0	0.0	0.0	0.0	0.0	0.0	0.0	0.0	0.0	0.0	0.0
OTU 691	0.0	0.0	0.0	83.0	0.0	0.0	0.0	0.0	0.0	0.0	0.0	73.0	0.0	0.0	0.0	0.0	0.0	0.0	0.0	0.0	0.0	14.0	0.0	0.0	0.0	0.0	0.0	0.0	0.0	0.0	0.0
OTU 692	0.0	0.0	0.0	0.0	4.0	16.0	0.0	55.0	0.0	0.0	0.0	48.0	0.0	47.0	0.0	0.0	0.0	0.0	0.0	0.0	0.0	0.0	0.0	0.0	0.0	0.0	0.0	0.0	0.0	0.0	0.0
OTU 693	0.0	0.0	0.0	0.0	0.0	0.0	0.0	0.0	0.0	0.0	0.0	97.0	0.0	0.0	0.0	73.0	0.0	0.0	0.0	0.0	0.0	0.0	0.0	0.0	0.0	0.0	0.0	0.0	0.0	0.0	0.0
OTU 694	0.0	0.0	0.0	72.0	0.0	0.0	0.0	17.0	0.0	20.0	0.0	0.0	0.0	0.0	0.0	0.0	0.0	0.0	0.0	60.0	0.0	0.0	0.0	0.0	0.0	0.0	0.0	0.0	0.0	0.0	0.0
OTU 695	0.0	0.0	0.0	0.0	26.0	8.0	10.0	16.0	11.0	0.0	5.0	0.0	28.0	0.0	0.0	0.0	10.0	15.0	0.0	0.0	15.0	0.0	8.0	0.0	17.0	0.0	0.0	0.0	0.0	0.0	0.0
OTU 696	0.0	0.0	0.0	0.0	0.0	20.0	76.0	0.0	0.0	0.0	0.0	0.0	9.0	0.0	0.0	0.0	0.0	0.0	0.0	0.0	0.0	0.0	0.0	0.0	64.0	0.0	0.0	0.0	0.0	0.0	0.0
OTU 697	0.0	0.0	21.0	0.0	22.0	0.0	0.0	0.0	8.0	0.0	0.0	0.0	0.0	0.0	0.0	0.0	0.0	0.0	0.0	62.0	0.0	44.0	0.0	0.0	11.0	0.0	0.0	0.0	0.0	0.0	0.0
OTU 698	0.0	0.0	0.0	0.0	0.0	0.0	0.0	0.0	0.0	0.0	0.0	51.0	0.0	31.0	0.0	0.0	0.0	0.0	0.0	0.0	0.0	0.0	86.0	0.0	0.0	0.0	0.0	0.0	0.0	0.0	0.0
OTU 699	0.0	0.0	0.0	126.0	0.0	0.0	0.0	0.0	0.0	0.0	0.0	0.0	0.0	0.0	0.0	0.0	0.0	0.0	0.0	0.0	0.0	41.0	0.0	0.0	0.0	0.0	0.0	0.0	0.0	0.0	0.0
OTU 700	0.0	0.0	0.0	0.0	0.0	0.0	24.0	92.0	0.0	0.0	0.0	0.0	0.0	34.0	0.0	0.0	0.0	0.0	0.0	0.0	0.0	0.0	0.0	0.0	17.0	0.0	0.0	0.0	0.0	0.0	0.0
OTU 701	0.0	0.0	0.0	0.0	0.0	0.0	9.0	11.0	19.0	0.0	9.0	9.0	0.0	9.0	4.0	0.0	0.0	0.0	0.0	4.0	7.0	13.0	0.0	0.0	0.0	21.0	3.0	20.0	13.0	4.0	12.0
OTU 702	0.0	0.0	0.0	0.0	0.0	0.0	0.0	0.0	0.0	0.0	0.0	0.0	37.0	0.0	0.0	0.0	0.0	0.0	0.0	0.0	19.0	0.0	10.0	83.0	18.0	0.0	0.0	0.0	0.0	0.0	0.0
OTU 703	0.0	0.0	0.0	0.0	0.0	0.0	0.0	0.0	0.0	0.0	0.0	0.0	0.0	0.0	0.0	0.0	18.0	69.0	0.0	0.0	0.0	67.0	0.0	0.0	13.0	0.0	0.0	0.0	0.0	0.0	0.0
OTU 704	0.0	0.0	0.0	0.0	0.0	0.0	15.0	8.0	18.0	0.0	13.0	0.0	0.0	0.0	8.0	0.0	0.0	0.0	0.0	46.0	7.0	18.0	0.0	0.0	0.0	13.0	0.0	9.0	0.0	11.0	0.0
OTU 705	0.0	0.0	0.0	0.0	0.0	0.0	0.0	0.0	0.0	0.0	0.0	67.0	0.0	99.0	0.0	0.0	0.0	0.0	0.0	0.0	0.0	0.0	0.0	0.0	0.0	0.0	0.0	0.0	0.0	0.0	0.0
OTU 706	0.0	36.0	0.0	0.0	0.0	0.0	0.0	0.0	35.0	0.0	0.0	28.0	34.0	0.0	0.0	0.0	0.0	25.0	0.0	0.0	0.0	0.0	0.0	0.0	0.0	0.0	0.0	0.0	7.0	0.0	0.0
OTU 707	0.0	0.0	0.0	97.0	6.0	0.0	0.0	0.0	0.0	0.0	0.0	0.0	0.0	23.0	0.0	0.0	0.0	0.0	0.0	33.0	0.0	0.0	5.0	0.0	0.0	0.0	0.0	0.0	0.0	0.0	0.0
OTU 708	0.0	0.0	0.0	33.0	0.0	0.0	0.0	0.0	0.0	0.0	0.0	0.0	0.0	0.0	0.0	0.0	0.0	0.0	0.0	0.0	0.0	0.0	0.0	0.0	0.0	0.0	110.0	0.0	0.0	0.0	20.0
OTU 709	0.0	0.0	0.0	0.0	23.0	10.0	0.0	0.0	53.0	0.0	0.0	11.0	0.0	0.0	0.0	0.0	0.0	60.0	0.0	0.0	0.0	0.0	0.0	0.0	0.0	0.0	0.0	6.0	0.0	0.0	0.0
OTU 710	0.0	0.0	0.0	0.0	0.0	0.0	82.0	0.0	0.0	0.0	0.0	0.0	0.0	0.0	0.0	0.0	0.0	0.0	0.0	0.0	0.0	0.0	0.0	0.0	0.0	81.0	0.0	0.0	0.0	0.0	0.0
OTU 711	0.0	0.0	0.0	0.0	0.0	0.0	37.0	0.0	0.0	0.0	22.0	0.0	0.0	15.0	0.0	0.0	0.0	0.0	0.0	0.0	0.0	0.0	0.0	0.0	0.0	89.0	0.0	0.0	0.0	0.0	0.0
OTU 712	0.0	16.0	0.0	0.0	0.0	0.0	16.0	22.0	31.0	0.0	3.0	0.0	0.0	0.0	0.0	0.0	11.0	0.0	0.0	0.0	8.0	6.0	0.0	0.0	0.0	30.0	0.0	19.0	0.0	0.0	0.0
OTU 713	0.0	0.0	88.0	0.0	0.0	0.0	0.0	0.0	0.0	0.0	0.0	28.0	0.0	0.0	0.0	0.0	0.0	0.0	0.0	0.0	0.0	0.0	0.0	0.0	0.0	0.0	28.0	0.0	0.0	0.0	18.0
OTU 714	0.0	11.0	0.0	0.0	0.0	0.0	0.0	0.0	0.0	0.0	0.0	0.0	16.0	0.0	0.0	0.0	0.0	0.0	0.0	0.0	42.0	0.0	0.0	0.0	92.0	0.0	0.0	0.0	0.0	0.0	0.0
OTU 715	0.0	0.0	0.0	17.0	8.0	0.0	0.0	0.0	0.0	0.0	0.0	58.0	35.0	0.0	0.0	0.0	0.0	0.0	0.0	0.0	0.0	0.0	0.0	0.0	43.0	0.0	0.0	0.0	0.0	0.0	0.0
OTU 716	0.0	0.0	0.0	0.0	0.0	0.0	0.0	99.0	0.0	0.0	0.0	10.0	0.0	0.0	0.0	0.0	0.0	0.0	0.0	37.0	0.0	0.0	0.0	0.0	0.0	0.0	0.0	0.0	0.0	0.0	15.0
OTU 717	0.0	0.0	0.0	31.0	0.0	19.0	0.0	0.0	17.0	0.0	43.0	0.0	0.0	0.0	0.0	0.0	0.0	0.0	11.0	0.0	0.0	9.0	0.0	30.0	0.0	0.0	0.0	0.0	0.0	0.0	0.0
OTU 718	0.0	0.0	0.0	0.0	10.0	0.0	0.0	0.0	0.0	0.0	0.0	5.0	0.0	0.0	0.0	0.0	0.0	0.0	0.0	25.0	0.0	0.0	0.0	0.0	0.0	46.0	0.0	0.0	74.0	0.0	0.0
OTU 719	0.0	0.0	0.0	0.0	0.0	0.0	0.0	0.0	0.0	0.0	0.0	0.0	0.0	50.0	0.0	0.0	0.0	0.0	0.0	0.0	68.0	0.0	0.0	0.0	0.0	0.0	17.0	0.0	0.0	25.0	0.0
OTU 720	0.0	0.0	0.0	0.0	0.0	0.0	0.0	0.0	0.0	0.0	0.0	0.0	0.0	0.0	0.0	0.0	0.0	0.0	32.0	0.0	0.0	0.0	0.0	0.0	0.0	0.0	0.0	0.0	116.0	12.0	0.0
OTU 721	0.0	0.0	0.0	0.0	0.0	0.0	0.0	0.0	0.0	0.0	0.0	0.0	0.0	0.0	0.0	0.0	0.0	0.0	0.0	0.0	0.0	0.0	82.0	0.0	0.0	0.0	0.0	0.0	0.0	78.0	0.0
OTU 722	6.0	32.0	0.0	0.0	0.0	17.0	0.0	0.0	0.0	0.0	0.0	25.0	20.0	0.0	0.0	0.0	26.0	0.0	0.0	0.0	0.0	0.0	0.0	0.0	0.0	0.0	0.0	0.0	33.0	0.0	0.0
OTU 723	0.0	0.0	0.0	45.0	0.0	0.0	0.0	0.0	0.0	0.0	0.0	0.0	0.0	0.0	0.0	0.0	0.0	0.0	0.0	0.0	0.0	0.0	42.0	0.0	27.0	0.0	0.0	45.0	0.0	0.0	0.0
OTU 724	0.0	0.0	0.0	14.0	0.0	0.0	0.0	0.0	0.0	0.0	0.0	76.0	11.0	0.0	23.0	0.0	0.0	0.0	0.0	0.0	8.0	0.0	13.0	0.0	0.0	6.0	0.0	8.0	0.0	0.0	0.0
OTU 725	0.0	0.0	0.0	0.0	6.0	0.0	0.0	0.0	0.0	0.0	91.0	0.0	0.0	0.0	0.0	0.0	0.0	18.0	0.0	0.0	0.0	0.0	0.0	0.0	0.0	44.0	0.0	0.0	0.0	0.0	0.0
OTU 726	0.0	0.0	0.0	0.0	0.0	32.0	0.0	0.0	0.0	0.0	0.0	84.0	0.0	0.0	0.0	0.0	0.0	0.0	0.0	43.0	0.0	0.0	0.0	0.0	0.0	0.0	0.0	0.0	0.0	0.0	0.0
OTU 727	0.0	0.0	0.0	0.0	0.0	0.0	0.0	0.0	0.0	0.0	0.0	10.0	0.0	118.0	0.0	0.0	0.0	0.0	0.0	0.0	0.0	31.0	0.0	0.0	0.0	0.0	0.0	0.0	0.0	0.0	0.0
OTU 728	31.0	15.0	0.0	0.0	0.0	0.0	0.0	0.0	12.0	0.0	0.0	15.0	13.0	31.0	0.0	5.0	0.0	0.0	0.0	0.0	0.0	0.0	0.0	0.0	29.0	0.0	6.0	0.0	0.0	0.0	0.0
OTU 729	0.0	0.0	0.0	18.0	5.0	0.0	0.0	61.0	0.0	0.0	0.0	0.0	0.0	0.0	0.0	0.0	0.0	0.0	5.0	0.0	0.0	0.0	0.0	18.0	0.0	0.0	22.0	0.0	0.0	0.0	28.0
OTU 730	0.0	0.0	0.0	0.0	0.0	0.0	0.0	0.0	0.0	14.0	0.0	0.0	0.0	0.0	0.0	0.0	0.0	0.0	0.0	0.0	0.0	0.0	0.0	78.0	0.0	0.0	64.0	0.0	0.0	0.0	0.0
OTU 731	9.0	0.0	0.0	0.0	14.0	0.0	0.0	0.0	15.0	0.0	0.0	0.0	27.0	0.0	0.0	0.0	0.0	0.0	0.0	0.0	0.0	75.0	15.0	0.0	0.0	0.0	0.0	0.0	0.0	0.0	0.0
OTU 732	0.0	57.0	0.0	0.0	18.0	0.0	22.0	0.0	0.0	0.0	0.0	0.0	0.0	0.0	0.0	0.0	0.0	0.0	0.0	0.0	0.0	24.0	0.0	0.0	0.0	0.0	0.0	34.0	0.0	0.0	0.0
OTU 733	0.0	0.0	0.0	0.0	0.0	0.0	0.0	54.0	14.0	0.0	0.0	0.0	0.0	48.0	0.0	0.0	0.0	0.0	0.0	16.0	0.0	23.0	0.0	0.0	0.0	0.0	0.0	0.0	0.0	0.0	0.0
OTU 734	0.0	0.0	0.0	0.0	0.0	0.0	0.0	0.0	89.0	0.0	0.0	0.0	0.0	0.0	0.0	65.0	0.0	0.0	0.0	0.0	0.0	0.0	0.0	0.0	0.0	0.0	0.0	0.0	0.0	0.0	0.0
OTU 735	0.0	52.0	0.0	0.0	0.0	0.0	13.0	15.0	23.0	0.0	32.0	0.0	0.0	0.0	0.0	0.0	0.0	1.0	0.0	0.0	0.0	0.0	0.0	0.0	0.0	0.0	0.0	8.0	0.0	9.0	0.0
OTU 736	0.0	0.0	0.0	12.0	5.0	6.0	3.0	0.0	0.0	2.0	5.0	12.0	14.0	0.0	0.0	0.0	7.0	10.0	0.0	0.0	2.0	9.0	8.0	28.0	2.0	7.0	0.0	0.0	21.0	0.0	0.0
OTU 737	0.0	0.0	0.0	0.0	32.0	0.0	0.0	0.0	0.0	121.0	0.0	0.0	0.0	0.0	0.0	0.0	0.0	0.0	0.0	0.0	0.0	0.0	0.0	0.0	0.0	0.0	0.0	0.0	0.0	0.0	0.0
OTU 738	0.0	0.0	0.0	0.0	0.0	0.0	19.0	15.0	11.0	0.0	13.0	0.0	0.0	0.0	0.0	0.0	0.0	0.0	0.0	0.0	0.0	36.0	0.0	0.0	0.0	15.0	9.0	11.0	0.0	9.0	15.0
OTU 739	0.0	0.0	0.0	0.0	0.0	62.0	0.0	0.0	0.0	0.0	0.0	0.0	0.0	0.0	0.0	0.0	0.0	0.0	0.0	0.0	0.0	0.0	0.0	0.0	0.0	39.0	0.0	0.0	51.0	0.0	0.0
OTU 740	43.0	9.0	74.0	0.0	0.0	0.0	0.0	0.0	0.0	0.0	0.0	0.0	0.0	0.0	0.0	0.0	4.0	7.0	0.0	9.0	0.0	0.0	0.0	0.0	5.0	0.0	0.0	0.0	0.0	0.0	0.0
OTU 741	0.0	0.0	0.0	0.0	0.0	0.0	0.0	24.0	0.0	36.0	0.0	0.0	0.0	0.0	0.0	0.0	0.0	0.0	0.0	0.0	0.0	0.0	0.0	0.0	0.0	91.0	0.0	0.0	0.0	0.0	0.0
OTU 742	0.0	0.0	0.0	0.0	0.0	0.0	0.0	0.0	0.0	0.0	0.0	101.0	0.0	0.0	0.0	0.0	0.0	0.0	0.0	27.0	0.0	0.0	0.0	0.0	0.0	23.0	0.0	0.0	0.0	0.0	0.0
OTU 743	0.0	0.0	0.0	0.0	0.0	75.0	0.0	0.0	24.0	32.0	0.0	8.0	0.0	0.0	0.0	0.0	0.0	0.0	0.0	0.0	0.0	0.0	0.0	11.0	0.0	0.0	0.0	0.0	0.0	0.0	0.0
OTU 744	3.0	0.0	0.0	4.0	13.0	21.0	7.0	0.0	8.0	0.0	2.0	0.0	20.0	0.0	0.0	5.0	14.0	9.0	0.0	4.0	0.0	0.0	0.0	27.0	6.0	0.0	0.0	0.0	6.0	0.0	0.0
OTU 745	0.0	19.0	0.0	42.0	0.0	0.0	0.0	0.0	0.0	0.0	0.0	0.0	13.0	0.0	0.0	11.0	0.0	0.0	0.0	49.0	0.0	0.0	0.0	0.0	0.0	0.0	0.0	0.0	0.0	15.0	0.0
OTU 746	0.0	0.0	0.0	0.0	7.0	0.0	0.0	0.0	25.0	0.0	0.0	15.0	0.0	13.0	0.0	0.0	0.0	0.0	0.0	0.0	0.0	10.0	24.0	7.0	0.0	18.0	0.0	30.0	0.0	0.0	0.0
OTU 747	0.0	0.0	0.0	0.0	0.0	0.0	63.0	0.0	0.0	0.0	0.0	0.0	0.0	0.0	0.0	0.0	0.0	0.0	0.0	0.0	0.0	0.0	0.0	0.0	0.0	0.0	0.0	86.0	0.0	0.0	0.0
OTU 748	0.0	80.0	0.0	0.0	0.0	0.0	0.0	0.0	0.0	0.0	0.0	0.0	9.0	0.0	0.0	0.0	0.0	0.0	0.0	0.0	0.0	0.0	0.0	0.0	0.0	0.0	0.0	59.0	0.0	0.0	0.0
OTU 749	0.0	16.0	0.0	25.0	0.0	0.0	10.0	23.0	30.0	0.0	0.0	0.0	0.0	0.0	0.0	0.0	0.0	9.0	0.0	0.0	10.0	0.0	0.0	0.0	0.0	0.0	0.0	0.0	0.0	25.0	0.0
OTU 750	0.0	0.0	0.0	0.0	38.0	0.0	0.0	18.0	0.0	0.0	0.0	0.0	0.0	0.0	0.0	0.0	0.0	0.0	0.0	0.0	0.0	0.0	0.0	0.0	0.0	0.0	63.0	29.0	0.0	0.0	0.0
OTU 751	0.0	0.0	0.0	0.0	0.0	0.0	0.0	18.0	22.0	0.0	0.0	9.0	0.0	8.0	4.0	0.0	0.0	0.0	0.0	18.0	19.0	12.0	9.0	0.0	0.0	0.0	0.0	0.0	0.0	16.0	13.0
OTU 752	0.0	0.0	0.0	0.0	0.0	0.0	0.0	0.0	47.0	0.0	0.0	0.0	0.0	0.0	0.0	0.0	0.0	0.0	0.0	0.0	0.0	0.0	48.0	27.0	26.0	0.0	0.0	0.0	0.0	0.0	0.0
OTU 753	0.0	0.0	0.0	0.0	0.0	0.0	0.0	0.0	0.0	0.0	0.0	75.0	0.0	0.0	0.0	0.0	0.0	0.0	0.0	0.0	50.0	14.0	9.0	0.0	0.0	0.0	0.0	0.0	0.0	0.0	0.0
OTU 754	0.0	0.0	0.0	0.0	0.0	0.0	0.0	0.0	0.0	0.0	0.0	0.0	0.0	0.0	0.0	0.0	0.0	0.0	0.0	0.0	46.0	0.0	0.0	0.0	102.0	0.0	0.0	0.0	0.0	0.0	0.0
OTU 755	0.0	0.0	0.0	0.0	0.0	0.0	0.0	0.0	11.0	16.0	36.0	0.0	54.0	0.0	0.0	0.0	0.0	0.0	0.0	0.0	0.0	13.0	0.0	0.0	17.0	0.0	0.0	0.0	0.0	0.0	0.0
OTU 756	0.0	22.0	0.0	0.0	0.0	0.0	0.0	66.0	0.0	0.0	0.0	0.0	0.0	0.0	0.0	0.0	0.0	0.0	0.0	0.0	0.0	0.0	0.0	18.0	0.0	0.0	0.0	40.0	0.0	0.0	0.0
OTU 757	0.0	0.0	0.0	62.0	0.0	0.0	0.0	0.0	0.0	0.0	66.0	0.0	0.0	0.0	0.0	0.0	0.0	0.0	0.0	0.0	0.0	0.0	18.0	0.0	0.0	0.0	0.0	0.0	0.0	0.0	0.0
OTU 758	0.0	0.0	0.0	0.0	15.0	0.0	0.0	0.0	0.0	0.0	0.0	0.0	0.0	0.0	0.0	0.0	0.0	0.0	29.0	0.0	0.0	0.0	0.0	0.0	0.0	102.0	0.0	0.0	0.0	0.0	0.0
OTU 759	0.0	0.0	0.0	0.0	0.0	0.0	0.0	0.0	47.0	0.0	0.0	0.0	0.0	0.0	0.0	0.0	0.0	0.0	0.0	12.0	0.0	87.0	0.0	0.0	0.0	0.0	0.0	0.0	0.0	0.0	0.0
OTU 760	0.0	0.0	0.0	0.0	0.0	0.0	0.0	0.0	0.0	0.0	0.0	86.0	0.0	0.0	0.0	0.0	0.0	0.0	0.0	0.0	0.0	0.0	0.0	0.0	0.0	0.0	60.0	0.0	0.0	0.0	0.0
OTU 761	0.0	0.0	0.0	0.0	0.0	13.0	0.0	0.0	0.0	10.0	28.0	0.0	34.0	0.0	0.0	19.0	0.0	0.0	0.0	41.0	0.0	0.0	0.0	0.0	0.0	0.0	0.0	0.0	0.0	0.0	0.0
OTU 762	0.0	0.0	0.0	0.0	0.0	0.0	0.0	0.0	0.0	0.0	0.0	0.0	16.0	0.0	0.0	0.0	72.0	57.0	0.0	0.0	0.0	0.0	0.0	0.0	0.0	0.0	0.0	0.0	0.0	0.0	0.0
OTU 763	0.0	46.0	0.0	0.0	0.0	0.0	0.0	0.0	0.0	0.0	0.0	0.0	0.0	0.0	0.0	0.0	0.0	0.0	0.0	0.0	0.0	39.0	59.0	0.0	0.0	0.0	0.0	0.0	0.0	0.0	0.0
OTU 764	0.0	0.0	0.0	25.0	0.0	0.0	23.0	0.0	0.0	0.0	53.0	0.0	0.0	0.0	0.0	0.0	0.0	0.0	0.0	0.0	0.0	0.0	0.0	0.0	0.0	12.0	0.0	30.0	0.0	0.0	0.0
OTU 765	0.0	0.0	0.0	0.0	69.0	0.0	0.0	0.0	0.0	0.0	0.0	0.0	0.0	0.0	0.0	0.0	0.0	0.0	0.0	0.0	41.0	0.0	0.0	0.0	0.0	0.0	0.0	0.0	0.0	33.0	0.0
OTU 766	0.0	0.0	0.0	0.0	19.0	0.0	27.0	0.0	0.0	0.0	0.0	0.0	0.0	0.0	0.0	0.0	0.0	0.0	0.0	39.0	58.0	0.0	0.0	0.0	0.0	0.0	0.0	0.0	0.0	0.0	0.0
OTU 767	0.0	0.0	0.0	0.0	0.0	43.0	0.0	0.0	0.0	0.0	0.0	0.0	0.0	0.0	0.0	0.0	0.0	0.0	0.0	0.0	0.0	36.0	0.0	0.0	0.0	38.0	0.0	0.0	26.0	0.0	0.0
OTU 768	85.0	0.0	0.0	0.0	0.0	0.0	0.0	0.0	0.0	57.0	0.0	0.0	0.0	0.0	0.0	0.0	0.0	0.0	0.0	0.0	0.0	0.0	0.0	0.0	0.0	0.0	0.0	0.0	0.0	0.0	0.0
OTU 769	0.0	15.0	0.0	0.0	0.0	0.0	0.0	0.0	0.0	0.0	0.0	19.0	0.0	25.0	0.0	3.0	0.0	0.0	0.0	0.0	7.0	0.0	13.0	34.0	26.0	0.0	0.0	0.0	0.0	0.0	0.0
OTU 770	0.0	0.0	0.0	0.0	0.0	0.0	0.0	0.0	0.0	0.0	0.0	0.0	0.0	0.0	0.0	0.0	0.0	0.0	0.0	16.0	0.0	0.0	0.0	64.0	62.0	0.0	0.0	0.0	0.0	0.0	0.0
OTU 771	0.0	0.0	0.0	0.0	0.0	0.0	0.0	0.0	0.0	0.0	0.0	0.0	0.0	0.0	0.0	0.0	0.0	0.0	0.0	0.0	0.0	0.0	0.0	0.0	0.0	72.0	0.0	69.0	0.0	0.0	0.0
OTU 772	0.0	0.0	74.0	0.0	0.0	0.0	0.0	0.0	0.0	0.0	0.0	7.0	0.0	0.0	0.0	0.0	0.0	0.0	0.0	0.0	0.0	0.0	12.0	0.0	47.0	0.0	0.0	0.0	0.0	0.0	0.0
OTU 773	0.0	0.0	0.0	0.0	18.0	12.0	0.0	0.0	13.0	15.0	0.0	0.0	23.0	0.0	0.0	0.0	0.0	8.0	0.0	0.0	0.0	12.0	0.0	22.0	17.0	0.0	0.0	0.0	0.0	0.0	0.0
OTU 774	0.0	0.0	0.0	0.0	0.0	0.0	0.0	0.0	0.0	0.0	0.0	0.0	77.0	0.0	0.0	0.0	0.0	0.0	0.0	0.0	63.0	0.0	0.0	0.0	0.0	0.0	0.0	0.0	0.0	0.0	0.0
OTU 775	0.0	0.0	0.0	0.0	0.0	0.0	0.0	0.0	0.0	0.0	0.0	0.0	0.0	0.0	0.0	0.0	62.0	78.0	0.0	0.0	0.0	0.0	0.0	0.0	0.0	0.0	0.0	0.0	0.0	0.0	0.0
OTU 776	0.0	0.0	0.0	60.0	0.0	0.0	0.0	0.0	0.0	0.0	0.0	12.0	0.0	20.0	0.0	0.0	0.0	0.0	0.0	0.0	26.0	0.0	0.0	0.0	0.0	0.0	21.0	0.0	0.0	0.0	0.0
OTU 777	0.0	0.0	0.0	59.0	14.0	0.0	0.0	0.0	0.0	0.0	0.0	5.0	0.0	0.0	0.0	0.0	0.0	0.0	48.0	0.0	0.0	0.0	13.0	0.0	0.0	0.0	0.0	0.0	0.0	0.0	0.0
OTU 778	0.0	0.0	0.0	0.0	23.0	9.0	0.0	0.0	12.0	17.0	0.0	0.0	9.0	0.0	0.0	0.0	0.0	15.0	0.0	0.0	0.0	7.0	0.0	20.0	27.0	0.0	0.0	0.0	0.0	0.0	0.0
OTU 779	0.0	0.0	0.0	0.0	22.0	10.0	0.0	0.0	14.0	28.0	0.0	0.0	14.0	0.0	0.0	0.0	0.0	10.0	0.0	0.0	0.0	6.0	0.0	14.0	21.0	0.0	0.0	0.0	0.0	0.0	0.0
OTU 780	0.0	0.0	0.0	0.0	0.0	0.0	15.0	13.0	12.0	0.0	20.0	3.0	0.0	15.0	0.0	0.0	0.0	0.0	0.0	3.0	9.0	13.0	0.0	0.0	0.0	0.0	15.0	0.0	0.0	5.0	16.0
OTU 781	0.0	0.0	0.0	0.0	0.0	0.0	0.0	51.0	0.0	0.0	0.0	0.0	0.0	0.0	0.0	0.0	0.0	0.0	0.0	0.0	0.0	0.0	0.0	0.0	0.0	0.0	0.0	0.0	0.0	88.0	0.0
OTU 782	0.0	0.0	0.0	0.0	0.0	0.0	0.0	5.0	20.0	0.0	0.0	12.0	0.0	6.0	3.0	0.0	0.0	0.0	0.0	14.0	13.0	16.0	12.0	0.0	0.0	0.0	0.0	0.0	0.0	22.0	16.0
OTU 783	0.0	0.0	0.0	0.0	0.0	0.0	0.0	0.0	27.0	15.0	0.0	0.0	0.0	0.0	0.0	0.0	0.0	0.0	0.0	0.0	13.0	0.0	12.0	17.0	17.0	16.0	16.0	0.0	0.0	6.0	0.0
OTU 784	0.0	13.0	0.0	0.0	0.0	0.0	0.0	0.0	5.0	0.0	0.0	0.0	0.0	0.0	0.0	0.0	42.0	0.0	0.0	0.0	35.0	0.0	43.0	0.0	0.0	0.0	0.0	0.0	0.0	0.0	0.0
OTU 785	0.0	0.0	52.0	0.0	0.0	0.0	0.0	0.0	0.0	0.0	0.0	0.0	0.0	17.0	0.0	0.0	0.0	0.0	0.0	0.0	36.0	9.0	0.0	24.0	0.0	0.0	0.0	0.0	0.0	0.0	0.0
OTU 786	0.0	0.0	0.0	9.0	12.0	0.0	16.0	0.0	0.0	0.0	12.0	18.0	0.0	0.0	0.0	7.0	0.0	0.0	0.0	15.0	8.0	0.0	0.0	0.0	0.0	0.0	13.0	0.0	0.0	28.0	0.0
OTU 787	0.0	0.0	0.0	9.0	12.0	0.0	16.0	0.0	0.0	0.0	19.0	15.0	0.0	0.0	0.0	8.0	0.0	0.0	0.0	0.0	12.0	0.0	0.0	0.0	0.0	0.0	8.0	0.0	0.0	39.0	0.0
OTU 788	0.0	0.0	0.0	0.0	0.0	0.0	0.0	0.0	0.0	138.0	0.0	0.0	0.0	0.0	0.0	0.0	0.0	0.0	0.0	0.0	0.0	0.0	0.0	0.0	0.0	0.0	0.0	0.0	0.0	0.0	0.0
OTU 789	0.0	0.0	0.0	0.0	0.0	0.0	0.0	0.0	0.0	0.0	0.0	0.0	21.0	0.0	0.0	0.0	82.0	0.0	0.0	0.0	0.0	0.0	0.0	35.0	0.0	0.0	0.0	0.0	0.0	0.0	0.0
OTU 790	0.0	0.0	0.0	0.0	0.0	0.0	0.0	0.0	0.0	0.0	0.0	0.0	0.0	0.0	0.0	0.0	0.0	0.0	0.0	0.0	74.0	0.0	0.0	0.0	0.0	0.0	0.0	0.0	0.0	64.0	0.0
OTU 791	0.0	0.0	0.0	0.0	0.0	0.0	0.0	0.0	0.0	0.0	0.0	0.0	0.0	0.0	0.0	0.0	0.0	0.0	0.0	0.0	0.0	0.0	0.0	0.0	0.0	0.0	0.0	0.0	0.0	0.0	138.0
OTU 792	0.0	59.0	0.0	0.0	0.0	0.0	0.0	0.0	0.0	0.0	0.0	0.0	0.0	0.0	0.0	0.0	0.0	0.0	0.0	0.0	0.0	0.0	0.0	0.0	0.0	78.0	0.0	0.0	0.0	0.0	0.0
OTU 793	0.0	95.0	0.0	0.0	0.0	0.0	0.0	0.0	0.0	0.0	0.0	29.0	0.0	0.0	0.0	0.0	0.0	0.0	0.0	0.0	0.0	0.0	0.0	0.0	12.0	0.0	0.0	0.0	0.0	0.0	0.0
OTU 794	0.0	38.0	0.0	0.0	0.0	0.0	0.0	0.0	0.0	47.0	0.0	0.0	0.0	0.0	0.0	0.0	0.0	0.0	0.0	0.0	0.0	0.0	0.0	18.0	0.0	33.0	0.0	0.0	0.0	0.0	0.0
OTU 795	0.0	0.0	0.0	0.0	0.0	0.0	77.0	0.0	0.0	0.0	59.0	0.0	0.0	0.0	0.0	0.0	0.0	0.0	0.0	0.0	0.0	0.0	0.0	0.0	0.0	0.0	0.0	0.0	0.0	0.0	0.0
OTU 796	0.0	0.0	0.0	0.0	0.0	0.0	0.0	0.0	0.0	0.0	0.0	64.0	0.0	0.0	0.0	0.0	0.0	0.0	0.0	0.0	0.0	0.0	0.0	0.0	0.0	0.0	72.0	0.0	0.0	0.0	0.0
OTU 797	0.0	0.0	0.0	0.0	0.0	0.0	0.0	0.0	0.0	0.0	0.0	58.0	0.0	0.0	0.0	0.0	0.0	0.0	0.0	0.0	0.0	78.0	0.0	0.0	0.0	0.0	0.0	0.0	0.0	0.0	0.0
OTU 798	0.0	0.0	0.0	57.0	0.0	0.0	0.0	0.0	0.0	0.0	0.0	0.0	0.0	0.0	0.0	0.0	56.0	0.0	0.0	0.0	0.0	0.0	0.0	0.0	22.0	0.0	0.0	0.0	0.0	0.0	0.0
OTU 799	0.0	0.0	0.0	7.0	13.0	0.0	22.0	0.0	0.0	0.0	10.0	8.0	0.0	0.0	0.0	18.0	0.0	0.0	0.0	16.0	13.0	0.0	0.0	0.0	0.0	0.0	10.0	0.0	0.0	18.0	0.0
OTU 800	0.0	0.0	0.0	0.0	0.0	41.0	15.0	0.0	0.0	11.0	11.0	0.0	0.0	0.0	0.0	0.0	0.0	0.0	0.0	0.0	0.0	0.0	0.0	0.0	0.0	0.0	0.0	0.0	27.0	30.0	0.0
OTU 801	0.0	0.0	0.0	0.0	0.0	0.0	0.0	39.0	24.0	0.0	0.0	0.0	0.0	0.0	0.0	0.0	0.0	0.0	0.0	5.0	54.0	13.0	0.0	0.0	0.0	0.0	0.0	0.0	0.0	0.0	0.0
OTU 802	0.0	0.0	0.0	0.0	0.0	0.0	0.0	0.0	29.0	19.0	0.0	0.0	0.0	0.0	0.0	0.0	0.0	0.0	0.0	0.0	13.0	0.0	20.0	25.0	29.0	0.0	0.0	0.0	0.0	0.0	0.0
OTU 803	0.0	0.0	0.0	0.0	0.0	0.0	0.0	0.0	21.0	34.0	0.0	0.0	0.0	0.0	0.0	0.0	0.0	0.0	0.0	0.0	0.0	13.0	24.0	0.0	15.0	20.0	0.0	8.0	0.0	0.0	0.0
OTU 804	0.0	0.0	0.0	0.0	0.0	0.0	0.0	0.0	0.0	135.0	0.0	0.0	0.0	0.0	0.0	0.0	0.0	0.0	0.0	0.0	0.0	0.0	0.0	0.0	0.0	0.0	0.0	0.0	0.0	0.0	0.0
OTU 805	0.0	0.0	0.0	0.0	0.0	0.0	0.0	0.0	0.0	0.0	0.0	0.0	0.0	58.0	0.0	0.0	0.0	0.0	0.0	0.0	0.0	0.0	0.0	0.0	77.0	0.0	0.0	0.0	0.0	0.0	0.0
OTU 806	0.0	0.0	0.0	0.0	0.0	0.0	0.0	0.0	0.0	0.0	0.0	0.0	0.0	0.0	0.0	0.0	0.0	0.0	0.0	0.0	0.0	57.0	0.0	78.0	0.0	0.0	0.0	0.0	0.0	0.0	0.0
OTU 807	10.0	0.0	0.0	0.0	0.0	61.0	0.0	0.0	40.0	0.0	0.0	0.0	0.0	0.0	0.0	0.0	0.0	0.0	0.0	0.0	0.0	0.0	0.0	0.0	23.0	0.0	0.0	0.0	0.0	0.0	0.0
OTU 808	0.0	0.0	0.0	0.0	8.0	0.0	0.0	0.0	0.0	0.0	0.0	0.0	53.0	0.0	0.0	0.0	0.0	0.0	73.0	0.0	0.0	0.0	0.0	0.0	0.0	0.0	0.0	0.0	0.0	0.0	0.0
OTU 809	0.0	0.0	0.0	0.0	4.0	0.0	0.0	0.0	0.0	15.0	0.0	0.0	0.0	0.0	0.0	0.0	0.0	0.0	0.0	0.0	53.0	0.0	0.0	0.0	0.0	62.0	0.0	0.0	0.0	0.0	0.0
OTU 810	0.0	0.0	0.0	0.0	0.0	0.0	114.0	0.0	0.0	0.0	0.0	0.0	0.0	0.0	0.0	0.0	0.0	0.0	0.0	0.0	0.0	0.0	0.0	0.0	0.0	0.0	0.0	0.0	20.0	0.0	0.0
OTU 811	0.0	0.0	0.0	0.0	0.0	0.0	56.0	0.0	0.0	0.0	0.0	0.0	0.0	0.0	0.0	0.0	0.0	0.0	0.0	0.0	0.0	0.0	0.0	0.0	0.0	0.0	0.0	70.0	0.0	0.0	8.0
OTU 812	0.0	0.0	0.0	0.0	0.0	0.0	0.0	24.0	0.0	0.0	38.0	0.0	0.0	0.0	8.0	0.0	0.0	0.0	0.0	46.0	0.0	18.0	0.0	0.0	0.0	0.0	0.0	0.0	0.0	0.0	0.0
OTU 813	0.0	0.0	0.0	0.0	0.0	0.0	0.0	0.0	38.0	0.0	0.0	0.0	0.0	0.0	0.0	0.0	0.0	0.0	0.0	0.0	36.0	0.0	0.0	52.0	8.0	0.0	0.0	0.0	0.0	0.0	0.0
OTU 814	0.0	0.0	0.0	0.0	0.0	0.0	0.0	0.0	0.0	0.0	0.0	0.0	0.0	0.0	0.0	0.0	0.0	0.0	0.0	0.0	0.0	0.0	72.0	0.0	0.0	27.0	0.0	35.0	0.0	0.0	0.0
OTU 815	22.0	13.0	0.0	0.0	0.0	0.0	0.0	0.0	0.0	0.0	0.0	0.0	30.0	0.0	0.0	0.0	34.0	34.0	0.0	0.0	0.0	0.0	0.0	0.0	0.0	0.0	0.0	0.0	0.0	0.0	0.0
OTU 816	9.0	0.0	0.0	16.0	0.0	26.0	0.0	0.0	37.0	22.0	0.0	0.0	0.0	0.0	0.0	0.0	0.0	0.0	0.0	0.0	0.0	0.0	9.0	0.0	0.0	0.0	0.0	0.0	0.0	14.0	0.0
OTU 817	0.0	0.0	0.0	47.0	12.0	7.0	0.0	0.0	0.0	0.0	0.0	0.0	40.0	0.0	0.0	0.0	0.0	0.0	0.0	0.0	0.0	0.0	27.0	0.0	0.0	0.0	0.0	0.0	0.0	0.0	0.0
OTU 818	0.0	0.0	0.0	21.0	0.0	0.0	0.0	0.0	0.0	0.0	0.0	0.0	5.0	0.0	0.0	0.0	0.0	0.0	0.0	0.0	0.0	0.0	0.0	0.0	44.0	17.0	0.0	11.0	0.0	0.0	35.0
OTU 819	0.0	0.0	0.0	0.0	0.0	20.0	13.0	0.0	0.0	10.0	0.0	0.0	37.0	0.0	0.0	13.0	7.0	0.0	0.0	0.0	33.0	0.0	0.0	0.0	0.0	0.0	0.0	0.0	0.0	0.0	0.0
OTU 820	0.0	0.0	0.0	0.0	0.0	0.0	67.0	0.0	0.0	0.0	0.0	0.0	0.0	0.0	17.0	0.0	0.0	0.0	0.0	0.0	0.0	0.0	0.0	0.0	0.0	0.0	0.0	49.0	0.0	0.0	0.0
OTU 821	0.0	0.0	0.0	0.0	0.0	0.0	0.0	0.0	0.0	0.0	0.0	0.0	0.0	0.0	0.0	0.0	0.0	0.0	0.0	0.0	0.0	55.0	0.0	0.0	0.0	0.0	0.0	78.0	0.0	0.0	0.0
OTU 822	0.0	0.0	0.0	0.0	39.0	0.0	0.0	0.0	0.0	0.0	0.0	51.0	0.0	0.0	0.0	0.0	0.0	0.0	0.0	0.0	0.0	0.0	12.0	0.0	0.0	21.0	0.0	9.0	0.0	0.0	0.0
OTU 823	0.0	0.0	0.0	0.0	0.0	0.0	0.0	15.0	0.0	0.0	0.0	0.0	0.0	0.0	0.0	51.0	0.0	0.0	0.0	29.0	0.0	18.0	0.0	0.0	0.0	0.0	0.0	0.0	0.0	0.0	19.0
OTU 824	56.0	75.0	0.0	0.0	0.0	0.0	0.0	0.0	0.0	0.0	0.0	0.0	0.0	0.0	0.0	0.0	0.0	0.0	0.0	0.0	0.0	0.0	0.0	0.0	0.0	0.0	0.0	0.0	0.0	0.0	0.0
OTU 825	20.0	17.0	0.0	0.0	14.0	0.0	0.0	0.0	0.0	6.0	0.0	0.0	12.0	0.0	0.0	0.0	0.0	0.0	0.0	0.0	0.0	4.0	0.0	11.0	17.0	17.0	0.0	13.0	0.0	0.0	0.0
OTU 826	0.0	0.0	0.0	0.0	0.0	86.0	0.0	0.0	0.0	0.0	0.0	45.0	0.0	0.0	0.0	0.0	0.0	0.0	0.0	0.0	0.0	0.0	0.0	0.0	0.0	0.0	0.0	0.0	0.0	0.0	0.0
OTU 827	0.0	0.0	0.0	0.0	0.0	0.0	0.0	0.0	20.0	23.0	0.0	0.0	0.0	0.0	0.0	0.0	0.0	0.0	0.0	0.0	17.0	0.0	10.0	17.0	23.0	5.0	16.0	0.0	0.0	0.0	0.0
OTU 828	0.0	0.0	0.0	0.0	0.0	0.0	0.0	0.0	0.0	131.0	0.0	0.0	0.0	0.0	0.0	0.0	0.0	0.0	0.0	0.0	0.0	0.0	0.0	0.0	0.0	0.0	0.0	0.0	0.0	0.0	0.0
OTU 829	25.0	17.0	0.0	0.0	17.0	0.0	0.0	0.0	0.0	7.0	0.0	0.0	6.0	0.0	0.0	0.0	0.0	0.0	0.0	0.0	0.0	9.0	0.0	11.0	19.0	11.0	0.0	8.0	0.0	0.0	0.0
OTU 830	0.0	0.0	0.0	5.0	6.0	0.0	17.0	0.0	0.0	0.0	18.0	8.0	0.0	0.0	0.0	21.0	0.0	0.0	0.0	4.0	8.0	0.0	0.0	0.0	0.0	0.0	10.0	0.0	0.0	33.0	0.0
OTU 831	0.0	0.0	0.0	0.0	0.0	0.0	36.0	0.0	0.0	0.0	12.0	0.0	0.0	0.0	0.0	0.0	0.0	0.0	0.0	0.0	0.0	0.0	0.0	0.0	0.0	0.0	0.0	0.0	82.0	0.0	0.0
OTU 832	0.0	0.0	0.0	0.0	0.0	0.0	0.0	0.0	30.0	0.0	0.0	0.0	0.0	42.0	0.0	0.0	0.0	0.0	0.0	0.0	0.0	0.0	0.0	0.0	0.0	0.0	0.0	0.0	0.0	41.0	17.0
OTU 833	0.0	0.0	0.0	0.0	0.0	0.0	0.0	0.0	0.0	0.0	0.0	0.0	29.0	0.0	0.0	0.0	101.0	0.0	0.0	0.0	0.0	0.0	0.0	0.0	0.0	0.0	0.0	0.0	0.0	0.0	0.0
OTU 834	35.0	0.0	0.0	16.0	21.0	0.0	0.0	0.0	3.0	0.0	0.0	12.0	0.0	0.0	0.0	6.0	0.0	0.0	0.0	0.0	6.0	0.0	17.0	0.0	0.0	0.0	0.0	0.0	0.0	13.0	0.0
OTU 835	0.0	0.0	0.0	67.0	0.0	0.0	0.0	0.0	0.0	0.0	0.0	0.0	0.0	0.0	0.0	0.0	0.0	0.0	0.0	0.0	0.0	0.0	62.0	0.0	0.0	0.0	0.0	0.0	0.0	0.0	0.0
OTU 836	0.0	0.0	0.0	0.0	0.0	0.0	24.0	0.0	0.0	0.0	14.0	57.0	0.0	0.0	8.0	0.0	0.0	0.0	0.0	0.0	0.0	0.0	0.0	0.0	0.0	0.0	0.0	0.0	0.0	26.0	0.0
OTU 837	0.0	0.0	0.0	0.0	0.0	0.0	16.0	0.0	10.0	0.0	12.0	0.0	0.0	0.0	0.0	0.0	0.0	0.0	0.0	10.0	0.0	24.0	0.0	0.0	0.0	20.0	0.0	0.0	0.0	9.0	28.0
OTU 838	0.0	0.0	0.0	0.0	0.0	0.0	0.0	0.0	0.0	0.0	0.0	0.0	0.0	0.0	0.0	0.0	18.0	29.0	0.0	0.0	0.0	0.0	0.0	33.0	19.0	30.0	0.0	0.0	0.0	0.0	0.0
OTU 839	17.0	8.0	0.0	0.0	0.0	0.0	0.0	0.0	0.0	17.0	0.0	0.0	0.0	3.0	0.0	0.0	0.0	0.0	0.0	0.0	8.0	15.0	11.0	10.0	31.0	0.0	8.0	0.0	0.0	0.0	0.0
OTU 840	0.0	0.0	0.0	0.0	0.0	12.0	25.0	0.0	3.0	0.0	15.0	9.0	0.0	0.0	0.0	0.0	0.0	0.0	0.0	0.0	5.0	0.0	0.0	0.0	0.0	30.0	0.0	16.0	8.0	5.0	0.0
OTU 841	0.0	0.0	0.0	0.0	0.0	0.0	0.0	14.0	26.0	0.0	35.0	0.0	0.0	0.0	9.0	0.0	0.0	0.0	0.0	18.0	0.0	26.0	0.0	0.0	0.0	0.0	0.0	0.0	0.0	0.0	0.0
OTU 842	0.0	0.0	0.0	0.0	0.0	0.0	0.0	0.0	0.0	0.0	0.0	0.0	0.0	128.0	0.0	0.0	0.0	0.0	0.0	0.0	0.0	0.0	0.0	0.0	0.0	0.0	0.0	0.0	0.0	0.0	0.0
OTU 843	0.0	0.0	60.0	0.0	28.0	0.0	0.0	0.0	0.0	0.0	0.0	0.0	0.0	0.0	0.0	0.0	0.0	0.0	0.0	0.0	0.0	30.0	0.0	0.0	9.0	0.0	0.0	0.0	0.0	0.0	0.0
OTU 844	0.0	0.0	0.0	0.0	67.0	0.0	0.0	0.0	0.0	0.0	0.0	0.0	0.0	0.0	0.0	0.0	0.0	0.0	0.0	0.0	0.0	0.0	23.0	37.0	0.0	0.0	0.0	0.0	0.0	0.0	0.0
OTU 845	0.0	117.0	0.0	0.0	0.0	0.0	0.0	0.0	0.0	0.0	0.0	0.0	0.0	0.0	0.0	0.0	0.0	0.0	9.0	0.0	0.0	0.0	0.0	0.0	0.0	0.0	0.0	0.0	0.0	0.0	0.0
OTU 846	0.0	17.0	0.0	0.0	0.0	0.0	4.0	17.0	41.0	0.0	0.0	0.0	0.0	0.0	0.0	0.0	0.0	0.0	0.0	0.0	31.0	9.0	0.0	0.0	0.0	0.0	0.0	0.0	0.0	7.0	0.0
OTU 847	0.0	0.0	0.0	0.0	16.0	0.0	0.0	0.0	0.0	0.0	0.0	0.0	0.0	0.0	0.0	0.0	0.0	0.0	0.0	0.0	0.0	0.0	0.0	0.0	0.0	72.0	0.0	38.0	0.0	0.0	0.0
OTU 848	0.0	0.0	0.0	0.0	0.0	0.0	30.0	0.0	39.0	0.0	0.0	0.0	0.0	0.0	0.0	19.0	0.0	0.0	0.0	0.0	0.0	0.0	0.0	0.0	27.0	11.0	0.0	0.0	0.0	0.0	0.0
OTU 849	0.0	0.0	0.0	0.0	0.0	0.0	0.0	0.0	0.0	0.0	21.0	0.0	0.0	0.0	0.0	75.0	0.0	0.0	0.0	0.0	0.0	0.0	0.0	30.0	0.0	0.0	0.0	0.0	0.0	0.0	0.0
OTU 850	0.0	0.0	0.0	0.0	0.0	0.0	0.0	0.0	0.0	0.0	0.0	0.0	40.0	0.0	0.0	0.0	0.0	0.0	0.0	0.0	35.0	0.0	0.0	0.0	0.0	0.0	0.0	51.0	0.0	0.0	0.0
OTU 851	125.0	0.0	0.0	0.0	0.0	0.0	0.0	0.0	0.0	0.0	0.0	0.0	0.0	0.0	0.0	0.0	0.0	0.0	0.0	0.0	0.0	0.0	0.0	0.0	0.0	0.0	0.0	0.0	0.0	0.0	0.0
OTU 852	0.0	0.0	0.0	0.0	11.0	0.0	0.0	0.0	0.0	0.0	0.0	62.0	0.0	0.0	0.0	0.0	0.0	0.0	0.0	0.0	41.0	0.0	11.0	0.0	0.0	0.0	0.0	0.0	0.0	0.0	0.0
OTU 853	0.0	0.0	0.0	0.0	0.0	0.0	0.0	0.0	20.0	19.0	0.0	34.0	0.0	0.0	0.0	0.0	0.0	0.0	0.0	0.0	0.0	0.0	0.0	52.0	0.0	0.0	0.0	0.0	0.0	0.0	0.0
OTU 854	0.0	0.0	0.0	0.0	0.0	0.0	0.0	0.0	0.0	0.0	0.0	60.0	0.0	0.0	0.0	0.0	0.0	0.0	0.0	0.0	65.0	0.0	0.0	0.0	0.0	0.0	0.0	0.0	0.0	0.0	0.0
OTU 855	0.0	0.0	0.0	0.0	0.0	0.0	0.0	13.0	0.0	0.0	0.0	0.0	14.0	0.0	0.0	0.0	8.0	11.0	0.0	53.0	0.0	0.0	0.0	25.0	0.0	0.0	0.0	0.0	0.0	0.0	0.0
OTU 856	0.0	0.0	0.0	0.0	0.0	0.0	0.0	0.0	0.0	0.0	0.0	0.0	0.0	0.0	0.0	0.0	0.0	0.0	0.0	0.0	78.0	0.0	46.0	0.0	0.0	0.0	0.0	0.0	0.0	0.0	0.0
OTU 857	0.0	0.0	0.0	23.0	0.0	0.0	0.0	43.0	18.0	0.0	0.0	0.0	0.0	0.0	0.0	0.0	0.0	0.0	0.0	15.0	0.0	24.0	0.0	0.0	0.0	0.0	0.0	0.0	0.0	0.0	0.0
OTU 858	0.0	0.0	0.0	0.0	0.0	0.0	36.0	0.0	0.0	0.0	0.0	0.0	0.0	0.0	0.0	0.0	0.0	0.0	0.0	0.0	0.0	0.0	0.0	0.0	0.0	87.0	0.0	0.0	0.0	0.0	0.0
OTU 859	0.0	0.0	0.0	0.0	0.0	0.0	0.0	0.0	0.0	0.0	0.0	0.0	0.0	0.0	0.0	0.0	0.0	0.0	0.0	0.0	0.0	0.0	0.0	0.0	0.0	0.0	0.0	0.0	0.0	123.0	0.0
OTU 860	0.0	0.0	0.0	0.0	0.0	0.0	0.0	0.0	0.0	0.0	0.0	0.0	0.0	0.0	0.0	0.0	0.0	0.0	0.0	0.0	0.0	0.0	0.0	0.0	0.0	0.0	0.0	0.0	0.0	123.0	0.0
OTU 861	18.0	0.0	0.0	25.0	23.0	0.0	0.0	0.0	15.0	0.0	0.0	0.0	24.0	0.0	0.0	0.0	0.0	0.0	0.0	0.0	0.0	0.0	0.0	0.0	0.0	17.0	0.0	0.0	0.0	0.0	0.0
OTU 862	0.0	0.0	0.0	59.0	0.0	0.0	0.0	0.0	13.0	0.0	0.0	0.0	0.0	0.0	0.0	0.0	50.0	0.0	0.0	0.0	0.0	0.0	0.0	0.0	0.0	0.0	0.0	0.0	0.0	0.0	0.0
OTU 863	0.0	0.0	0.0	0.0	7.0	0.0	37.0	0.0	0.0	0.0	0.0	0.0	0.0	0.0	0.0	0.0	0.0	0.0	59.0	19.0	0.0	0.0	0.0	0.0	0.0	0.0	0.0	0.0	0.0	0.0	0.0
OTU 864	0.0	0.0	0.0	0.0	0.0	0.0	12.0	0.0	0.0	0.0	18.0	0.0	0.0	0.0	0.0	52.0	0.0	0.0	0.0	0.0	0.0	0.0	0.0	0.0	0.0	0.0	0.0	0.0	0.0	40.0	0.0
OTU 865	0.0	0.0	0.0	0.0	0.0	0.0	0.0	0.0	0.0	0.0	0.0	0.0	0.0	0.0	0.0	0.0	0.0	0.0	0.0	0.0	0.0	0.0	0.0	0.0	0.0	0.0	0.0	0.0	122.0	0.0	0.0
OTU 866	0.0	0.0	0.0	0.0	0.0	0.0	0.0	0.0	0.0	0.0	0.0	0.0	0.0	0.0	0.0	0.0	0.0	0.0	0.0	0.0	0.0	0.0	0.0	0.0	0.0	0.0	0.0	0.0	0.0	0.0	122.0
OTU 867	0.0	0.0	0.0	55.0	0.0	0.0	0.0	0.0	0.0	0.0	0.0	0.0	0.0	0.0	0.0	0.0	0.0	0.0	0.0	0.0	0.0	0.0	22.0	44.0	0.0	0.0	0.0	0.0	0.0	0.0	0.0
OTU 868	0.0	0.0	0.0	0.0	121.0	0.0	0.0	0.0	0.0	0.0	0.0	0.0	0.0	0.0	0.0	0.0	0.0	0.0	0.0	0.0	0.0	0.0	0.0	0.0	0.0	0.0	0.0	0.0	0.0	0.0	0.0
OTU 869	0.0	0.0	0.0	0.0	0.0	0.0	0.0	0.0	54.0	0.0	0.0	0.0	0.0	0.0	0.0	0.0	0.0	0.0	0.0	0.0	0.0	0.0	47.0	0.0	20.0	0.0	0.0	0.0	0.0	0.0	0.0
OTU 870	0.0	0.0	0.0	24.0	0.0	0.0	0.0	0.0	79.0	0.0	0.0	0.0	0.0	0.0	0.0	0.0	0.0	0.0	0.0	0.0	0.0	0.0	0.0	0.0	0.0	0.0	0.0	0.0	0.0	0.0	17.0
OTU 871	53.0	0.0	0.0	0.0	0.0	0.0	0.0	0.0	0.0	0.0	0.0	0.0	0.0	0.0	43.0	0.0	0.0	0.0	0.0	0.0	0.0	0.0	0.0	0.0	23.0	0.0	0.0	0.0	0.0	0.0	0.0
OTU 872	27.0	6.0	0.0	0.0	0.0	0.0	0.0	0.0	0.0	0.0	0.0	0.0	0.0	9.0	0.0	0.0	0.0	0.0	0.0	0.0	14.0	2.0	13.0	3.0	33.0	0.0	12.0	0.0	0.0	0.0	0.0
OTU 873	0.0	0.0	0.0	42.0	0.0	16.0	0.0	0.0	18.0	0.0	17.0	0.0	26.0	0.0	0.0	0.0	0.0	0.0	0.0	0.0	0.0	0.0	0.0	0.0	0.0	0.0	0.0	0.0	0.0	0.0	0.0
OTU 874	0.0	0.0	0.0	0.0	2.0	1.0	0.0	0.0	21.0	0.0	0.0	20.0	0.0	8.0	0.0	0.0	0.0	0.0	0.0	0.0	0.0	13.0	22.0	6.0	0.0	14.0	0.0	12.0	0.0	0.0	0.0
OTU 875	0.0	0.0	0.0	0.0	0.0	0.0	0.0	6.0	0.0	49.0	0.0	0.0	0.0	44.0	0.0	0.0	0.0	0.0	0.0	0.0	0.0	4.0	0.0	0.0	0.0	0.0	8.0	0.0	0.0	0.0	8.0
OTU 876	0.0	0.0	0.0	0.0	0.0	0.0	0.0	0.0	52.0	0.0	0.0	0.0	0.0	0.0	0.0	0.0	0.0	0.0	0.0	0.0	0.0	0.0	0.0	0.0	0.0	0.0	0.0	67.0	0.0	0.0	0.0
OTU 877	0.0	0.0	0.0	0.0	0.0	0.0	0.0	0.0	35.0	0.0	0.0	0.0	0.0	0.0	0.0	0.0	0.0	0.0	0.0	55.0	29.0	0.0	0.0	0.0	0.0	0.0	0.0	0.0	0.0	0.0	0.0
OTU 878	0.0	0.0	0.0	0.0	0.0	0.0	0.0	0.0	25.0	13.0	0.0	0.0	0.0	0.0	0.0	0.0	0.0	0.0	0.0	0.0	27.0	0.0	18.0	0.0	36.0	0.0	0.0	0.0	0.0	0.0	0.0
OTU 879	0.0	0.0	0.0	0.0	16.0	0.0	0.0	0.0	0.0	0.0	0.0	0.0	0.0	0.0	0.0	0.0	0.0	0.0	0.0	0.0	0.0	0.0	0.0	0.0	0.0	73.0	0.0	0.0	0.0	0.0	29.0
OTU 880	0.0	0.0	0.0	0.0	8.0	0.0	0.0	13.0	13.0	0.0	0.0	28.0	0.0	0.0	0.0	13.0	0.0	0.0	0.0	0.0	6.0	0.0	0.0	32.0	0.0	0.0	0.0	0.0	5.0	0.0	0.0
OTU 881	0.0	0.0	0.0	0.0	0.0	31.0	0.0	0.0	0.0	17.0	0.0	0.0	0.0	0.0	0.0	70.0	0.0	0.0	0.0	0.0	0.0	0.0	0.0	0.0	0.0	0.0	0.0	0.0	0.0	0.0	0.0
OTU 882	0.0	0.0	0.0	0.0	0.0	0.0	0.0	8.0	8.0	0.0	0.0	5.0	0.0	11.0	7.0	0.0	0.0	0.0	0.0	4.0	11.0	17.0	0.0	0.0	0.0	0.0	0.0	0.0	0.0	22.0	25.0
OTU 883	0.0	0.0	0.0	0.0	0.0	0.0	0.0	0.0	0.0	0.0	0.0	118.0	0.0	0.0	0.0	0.0	0.0	0.0	0.0	0.0	0.0	0.0	0.0	0.0	0.0	0.0	0.0	0.0	0.0	0.0	0.0
OTU 884	0.0	0.0	0.0	0.0	0.0	0.0	0.0	0.0	0.0	0.0	0.0	0.0	118.0	0.0	0.0	0.0	0.0	0.0	0.0	0.0	0.0	0.0	0.0	0.0	0.0	0.0	0.0	0.0	0.0	0.0	0.0
OTU 885	0.0	0.0	28.0	0.0	32.0	0.0	0.0	0.0	31.0	0.0	0.0	0.0	0.0	0.0	0.0	0.0	0.0	0.0	0.0	0.0	0.0	0.0	0.0	0.0	0.0	0.0	26.0	0.0	0.0	0.0	0.0
OTU 886	0.0	0.0	0.0	0.0	80.0	0.0	0.0	0.0	0.0	0.0	0.0	0.0	0.0	0.0	0.0	0.0	0.0	0.0	37.0	0.0	0.0	0.0	0.0	0.0	0.0	0.0	0.0	0.0	0.0	0.0	0.0
OTU 887	0.0	0.0	0.0	0.0	0.0	0.0	36.0	0.0	0.0	0.0	0.0	0.0	0.0	19.0	0.0	0.0	0.0	0.0	0.0	0.0	24.0	0.0	0.0	0.0	0.0	38.0	0.0	0.0	0.0	0.0	0.0
OTU 888	0.0	0.0	0.0	0.0	0.0	0.0	0.0	57.0	0.0	0.0	0.0	0.0	0.0	0.0	0.0	0.0	0.0	0.0	0.0	0.0	0.0	0.0	0.0	60.0	0.0	0.0	0.0	0.0	0.0	0.0	0.0
OTU 889	0.0	0.0	0.0	0.0	0.0	0.0	0.0	0.0	0.0	0.0	0.0	0.0	0.0	0.0	0.0	0.0	0.0	0.0	0.0	0.0	0.0	0.0	0.0	0.0	0.0	0.0	117.0	0.0	0.0	0.0	0.0
OTU 890	0.0	0.0	0.0	0.0	0.0	0.0	0.0	0.0	0.0	0.0	0.0	0.0	0.0	0.0	0.0	0.0	0.0	0.0	0.0	0.0	0.0	0.0	0.0	0.0	0.0	0.0	117.0	0.0	0.0	0.0	0.0
OTU 891	0.0	0.0	0.0	49.0	0.0	0.0	8.0	0.0	22.0	20.0	0.0	0.0	0.0	0.0	0.0	0.0	0.0	0.0	0.0	0.0	0.0	15.0	0.0	0.0	2.0	0.0	0.0	0.0	0.0	0.0	0.0
OTU 892	0.0	0.0	0.0	0.0	0.0	0.0	12.0	0.0	30.0	0.0	20.0	0.0	0.0	0.0	0.0	0.0	0.0	0.0	0.0	0.0	0.0	25.0	0.0	0.0	0.0	0.0	0.0	0.0	0.0	10.0	19.0
OTU 893	0.0	0.0	0.0	0.0	0.0	0.0	0.0	0.0	20.0	0.0	0.0	0.0	0.0	0.0	0.0	0.0	0.0	0.0	0.0	0.0	0.0	0.0	0.0	0.0	0.0	0.0	0.0	85.0	0.0	0.0	11.0
OTU 894	0.0	0.0	0.0	0.0	0.0	0.0	0.0	0.0	0.0	0.0	42.0	61.0	0.0	0.0	0.0	0.0	0.0	0.0	0.0	0.0	0.0	0.0	0.0	0.0	0.0	0.0	0.0	0.0	13.0	0.0	0.0
OTU 895	0.0	0.0	0.0	0.0	0.0	0.0	0.0	0.0	0.0	0.0	0.0	0.0	0.0	0.0	0.0	116.0	0.0	0.0	0.0	0.0	0.0	0.0	0.0	0.0	0.0	0.0	0.0	0.0	0.0	0.0	0.0
OTU 896	0.0	0.0	0.0	0.0	0.0	0.0	0.0	0.0	0.0	0.0	49.0	66.0	0.0	0.0	0.0	0.0	0.0	0.0	0.0	0.0	0.0	0.0	0.0	0.0	0.0	0.0	0.0	0.0	0.0	0.0	0.0
OTU 897	0.0	0.0	0.0	0.0	0.0	0.0	0.0	0.0	0.0	0.0	0.0	0.0	0.0	0.0	35.0	0.0	80.0	0.0	0.0	0.0	0.0	0.0	0.0	0.0	0.0	0.0	0.0	0.0	0.0	0.0	0.0
OTU 898	0.0	0.0	0.0	0.0	0.0	0.0	0.0	0.0	0.0	0.0	0.0	0.0	0.0	0.0	0.0	0.0	23.0	23.0	0.0	0.0	30.0	0.0	0.0	26.0	13.0	0.0	0.0	0.0	0.0	0.0	0.0
OTU 899	0.0	0.0	0.0	0.0	0.0	0.0	0.0	0.0	0.0	0.0	0.0	0.0	0.0	0.0	0.0	0.0	0.0	0.0	0.0	0.0	0.0	0.0	0.0	0.0	0.0	0.0	115.0	0.0	0.0	0.0	0.0
OTU 900	0.0	0.0	0.0	77.0	0.0	0.0	0.0	0.0	0.0	0.0	0.0	0.0	0.0	0.0	0.0	0.0	0.0	0.0	0.0	0.0	0.0	0.0	0.0	0.0	37.0	0.0	0.0	0.0	0.0	0.0	0.0
OTU 901	0.0	0.0	0.0	72.0	0.0	0.0	0.0	0.0	0.0	0.0	0.0	23.0	0.0	0.0	0.0	19.0	0.0	0.0	0.0	0.0	0.0	0.0	0.0	0.0	0.0	0.0	0.0	0.0	0.0	0.0	0.0
OTU 902	0.0	0.0	0.0	53.0	15.0	0.0	0.0	46.0	0.0	0.0	0.0	0.0	0.0	0.0	0.0	0.0	0.0	0.0	0.0	0.0	0.0	0.0	0.0	0.0	0.0	0.0	0.0	0.0	0.0	0.0	0.0
OTU 903	0.0	0.0	0.0	0.0	0.0	4.0	0.0	0.0	0.0	0.0	0.0	0.0	0.0	0.0	0.0	0.0	0.0	0.0	0.0	0.0	0.0	73.0	0.0	0.0	37.0	0.0	0.0	0.0	0.0	0.0	0.0
OTU 904	0.0	0.0	0.0	0.0	0.0	0.0	14.0	0.0	15.0	0.0	11.0	0.0	0.0	7.0	0.0	0.0	0.0	0.0	0.0	0.0	0.0	28.0	0.0	0.0	0.0	0.0	0.0	0.0	0.0	19.0	20.0
OTU 905	0.0	0.0	0.0	0.0	0.0	0.0	9.0	4.0	11.0	0.0	13.0	0.0	0.0	0.0	0.0	0.0	0.0	0.0	0.0	0.0	0.0	15.0	0.0	0.0	0.0	8.0	13.0	8.0	0.0	18.0	15.0
OTU 906	16.0	3.0	0.0	0.0	0.0	0.0	0.0	0.0	0.0	15.0	0.0	0.0	0.0	4.0	0.0	0.0	0.0	0.0	0.0	0.0	12.0	5.0	23.0	15.0	15.0	0.0	5.0	0.0	0.0	0.0	0.0
OTU 907	0.0	0.0	0.0	0.0	13.0	18.0	0.0	0.0	0.0	12.0	0.0	0.0	0.0	0.0	0.0	10.0	0.0	0.0	0.0	23.0	13.0	0.0	0.0	0.0	24.0	0.0	0.0	0.0	0.0	0.0	0.0
OTU 908	0.0	0.0	0.0	0.0	0.0	0.0	16.0	0.0	12.0	0.0	13.0	0.0	0.0	11.0	0.0	0.0	0.0	0.0	0.0	0.0	12.0	26.0	0.0	0.0	0.0	0.0	0.0	8.0	0.0	0.0	15.0
OTU 909	0.0	0.0	0.0	0.0	0.0	0.0	0.0	19.0	0.0	0.0	0.0	0.0	0.0	0.0	27.0	0.0	0.0	0.0	0.0	51.0	0.0	16.0	0.0	0.0	0.0	0.0	0.0	0.0	0.0	0.0	0.0
OTU 910	0.0	0.0	0.0	0.0	0.0	0.0	0.0	0.0	0.0	0.0	0.0	13.0	0.0	0.0	0.0	0.0	0.0	0.0	0.0	36.0	0.0	0.0	0.0	0.0	0.0	0.0	0.0	0.0	0.0	49.0	15.0
OTU 911	0.0	112.0	0.0	0.0	0.0	0.0	0.0	0.0	0.0	0.0	0.0	0.0	0.0	0.0	0.0	0.0	0.0	0.0	0.0	0.0	0.0	0.0	0.0	0.0	0.0	0.0	0.0	0.0	0.0	0.0	0.0
OTU 912	0.0	0.0	0.0	0.0	18.0	0.0	0.0	0.0	0.0	0.0	0.0	0.0	0.0	0.0	0.0	0.0	0.0	0.0	0.0	0.0	0.0	59.0	0.0	0.0	35.0	0.0	0.0	0.0	0.0	0.0	0.0
OTU 913	0.0	0.0	0.0	0.0	0.0	0.0	0.0	0.0	0.0	0.0	38.0	0.0	0.0	0.0	0.0	0.0	0.0	0.0	74.0	0.0	0.0	0.0	0.0	0.0	0.0	0.0	0.0	0.0	0.0	0.0	0.0
OTU 914	0.0	0.0	0.0	0.0	0.0	0.0	0.0	0.0	0.0	0.0	0.0	112.0	0.0	0.0	0.0	0.0	0.0	0.0	0.0	0.0	0.0	0.0	0.0	0.0	0.0	0.0	0.0	0.0	0.0	0.0	0.0
OTU 915	31.0	3.0	0.0	0.0	0.0	0.0	0.0	0.0	0.0	0.0	0.0	0.0	0.0	0.0	0.0	0.0	0.0	0.0	0.0	0.0	9.0	10.0	16.0	10.0	19.0	0.0	13.0	0.0	0.0	0.0	0.0
OTU 916	21.0	8.0	0.0	0.0	0.0	0.0	0.0	0.0	0.0	0.0	0.0	0.0	0.0	0.0	0.0	0.0	0.0	0.0	0.0	0.0	8.0	16.0	10.0	6.0	22.0	0.0	20.0	0.0	0.0	0.0	0.0
OTU 917	0.0	0.0	0.0	0.0	16.0	0.0	0.0	0.0	0.0	0.0	0.0	0.0	0.0	0.0	0.0	0.0	0.0	0.0	27.0	0.0	0.0	58.0	10.0	0.0	0.0	0.0	0.0	0.0	0.0	0.0	0.0
OTU 918	0.0	0.0	0.0	0.0	0.0	0.0	0.0	13.0	0.0	0.0	0.0	0.0	12.0	0.0	0.0	0.0	13.0	15.0	0.0	21.0	0.0	0.0	27.0	10.0	0.0	0.0	0.0	0.0	0.0	0.0	0.0
OTU 919	0.0	0.0	0.0	0.0	0.0	0.0	0.0	0.0	26.0	0.0	0.0	18.0	0.0	0.0	0.0	0.0	0.0	0.0	0.0	0.0	0.0	0.0	0.0	67.0	0.0	0.0	0.0	0.0	0.0	0.0	0.0
OTU 920	0.0	0.0	0.0	0.0	45.0	0.0	0.0	0.0	0.0	0.0	0.0	0.0	0.0	0.0	0.0	0.0	0.0	0.0	0.0	0.0	0.0	0.0	0.0	0.0	40.0	25.0	0.0	0.0	0.0	0.0	0.0
OTU 921	0.0	0.0	0.0	0.0	17.0	0.0	0.0	0.0	0.0	0.0	20.0	20.0	0.0	0.0	0.0	0.0	0.0	0.0	0.0	0.0	0.0	0.0	16.0	0.0	0.0	0.0	0.0	0.0	0.0	37.0	0.0
OTU 922	0.0	0.0	0.0	0.0	10.0	18.0	0.0	0.0	0.0	16.0	0.0	0.0	0.0	0.0	0.0	15.0	0.0	0.0	0.0	22.0	13.0	0.0	0.0	0.0	16.0	0.0	0.0	0.0	0.0	0.0	0.0
OTU 923	0.0	0.0	0.0	0.0	0.0	0.0	26.0	0.0	10.0	0.0	9.0	0.0	0.0	10.0	0.0	0.0	0.0	0.0	0.0	0.0	0.0	29.0	0.0	0.0	0.0	0.0	0.0	0.0	0.0	13.0	13.0
OTU 924	0.0	0.0	0.0	0.0	0.0	0.0	0.0	74.0	0.0	0.0	25.0	0.0	0.0	0.0	0.0	0.0	0.0	0.0	0.0	0.0	0.0	11.0	0.0	0.0	0.0	0.0	0.0	0.0	0.0	0.0	0.0
OTU 925	0.0	0.0	0.0	0.0	0.0	0.0	109.0	0.0	0.0	0.0	0.0	0.0	0.0	0.0	0.0	0.0	0.0	0.0	0.0	0.0	0.0	0.0	0.0	0.0	0.0	0.0	0.0	0.0	0.0	0.0	0.0
OTU 926	0.0	0.0	0.0	0.0	0.0	0.0	0.0	0.0	0.0	0.0	0.0	0.0	0.0	0.0	0.0	0.0	0.0	0.0	0.0	0.0	48.0	0.0	0.0	0.0	61.0	0.0	0.0	0.0	0.0	0.0	0.0
OTU 927	0.0	0.0	0.0	0.0	108.0	0.0	0.0	0.0	0.0	0.0	0.0	0.0	0.0	0.0	0.0	0.0	0.0	0.0	0.0	0.0	0.0	0.0	0.0	0.0	0.0	0.0	0.0	0.0	0.0	0.0	0.0
OTU 928	0.0	0.0	0.0	0.0	55.0	0.0	0.0	0.0	0.0	15.0	0.0	0.0	0.0	0.0	0.0	0.0	0.0	0.0	38.0	0.0	0.0	0.0	0.0	0.0	0.0	0.0	0.0	0.0	0.0	0.0	0.0
OTU 929	0.0	0.0	0.0	0.0	23.0	0.0	0.0	0.0	0.0	76.0	0.0	9.0	0.0	0.0	0.0	0.0	0.0	0.0	0.0	0.0	0.0	0.0	0.0	0.0	0.0	0.0	0.0	0.0	0.0	0.0	0.0
OTU 930	0.0	0.0	0.0	0.0	18.0	0.0	0.0	0.0	0.0	0.0	35.0	0.0	0.0	2.0	0.0	0.0	0.0	0.0	0.0	0.0	0.0	0.0	0.0	0.0	0.0	53.0	0.0	0.0	0.0	0.0	0.0
OTU 931	0.0	0.0	0.0	0.0	0.0	0.0	0.0	0.0	0.0	0.0	0.0	0.0	0.0	108.0	0.0	0.0	0.0	0.0	0.0	0.0	0.0	0.0	0.0	0.0	0.0	0.0	0.0	0.0	0.0	0.0	0.0
OTU 932	0.0	0.0	0.0	0.0	0.0	0.0	0.0	0.0	0.0	0.0	0.0	0.0	0.0	0.0	0.0	0.0	0.0	0.0	108.0	0.0	0.0	0.0	0.0	0.0	0.0	0.0	0.0	0.0	0.0	0.0	0.0
OTU 933	0.0	0.0	0.0	0.0	41.0	0.0	0.0	0.0	0.0	0.0	0.0	0.0	0.0	0.0	0.0	0.0	0.0	0.0	0.0	0.0	0.0	66.0	0.0	0.0	0.0	0.0	0.0	0.0	0.0	0.0	0.0
OTU 934	0.0	0.0	0.0	0.0	0.0	46.0	0.0	21.0	0.0	0.0	0.0	0.0	0.0	0.0	40.0	0.0	0.0	0.0	0.0	0.0	0.0	0.0	0.0	0.0	0.0	0.0	0.0	0.0	0.0	0.0	0.0
OTU 935	0.0	0.0	0.0	0.0	0.0	12.0	9.0	0.0	4.0	0.0	21.0	17.0	0.0	0.0	0.0	12.0	0.0	0.0	0.0	0.0	10.0	0.0	0.0	0.0	0.0	11.0	0.0	0.0	0.0	11.0	0.0
OTU 936	0.0	0.0	0.0	0.0	0.0	0.0	26.0	0.0	6.0	0.0	10.0	0.0	0.0	6.0	0.0	0.0	0.0	0.0	0.0	0.0	11.0	20.0	0.0	0.0	0.0	0.0	0.0	9.0	0.0	0.0	19.0
OTU 937	0.0	0.0	0.0	0.0	0.0	0.0	26.0	0.0	13.0	0.0	10.0	0.0	0.0	0.0	0.0	0.0	0.0	0.0	0.0	0.0	0.0	21.0	0.0	0.0	0.0	0.0	0.0	0.0	0.0	14.0	23.0
OTU 938	0.0	0.0	0.0	0.0	0.0	0.0	0.0	0.0	24.0	12.0	0.0	0.0	0.0	0.0	0.0	0.0	0.0	0.0	0.0	0.0	16.0	0.0	7.0	16.0	32.0	0.0	0.0	0.0	0.0	0.0	0.0
OTU 939	0.0	0.0	0.0	0.0	0.0	0.0	0.0	0.0	0.0	0.0	0.0	0.0	38.0	0.0	0.0	0.0	0.0	0.0	0.0	0.0	0.0	0.0	0.0	0.0	0.0	69.0	0.0	0.0	0.0	0.0	0.0
OTU 940	0.0	0.0	0.0	0.0	0.0	0.0	0.0	0.0	0.0	0.0	0.0	0.0	0.0	0.0	0.0	0.0	0.0	0.0	0.0	0.0	0.0	0.0	0.0	0.0	107.0	0.0	0.0	0.0	0.0	0.0	0.0
OTU 941	0.0	0.0	0.0	0.0	32.0	0.0	22.0	0.0	30.0	0.0	22.0	0.0	0.0	0.0	0.0	0.0	0.0	0.0	0.0	0.0	0.0	0.0	0.0	0.0	0.0	0.0	0.0	0.0	0.0	0.0	0.0
OTU 942	0.0	0.0	0.0	0.0	0.0	106.0	0.0	0.0	0.0	0.0	0.0	0.0	0.0	0.0	0.0	0.0	0.0	0.0	0.0	0.0	0.0	0.0	0.0	0.0	0.0	0.0	0.0	0.0	0.0	0.0	0.0
OTU 943	0.0	0.0	0.0	0.0	0.0	0.0	0.0	0.0	53.0	0.0	0.0	0.0	0.0	0.0	0.0	0.0	0.0	0.0	0.0	0.0	0.0	0.0	0.0	53.0	0.0	0.0	0.0	0.0	0.0	0.0	0.0
OTU 944	0.0	0.0	0.0	0.0	0.0	0.0	0.0	0.0	0.0	0.0	0.0	0.0	0.0	59.0	0.0	33.0	0.0	0.0	0.0	0.0	0.0	14.0	0.0	0.0	0.0	0.0	0.0	0.0	0.0	0.0	0.0
OTU 945	0.0	0.0	0.0	0.0	0.0	0.0	0.0	0.0	0.0	0.0	0.0	0.0	0.0	0.0	0.0	0.0	0.0	56.0	0.0	0.0	0.0	0.0	0.0	0.0	50.0	0.0	0.0	0.0	0.0	0.0	0.0
OTU 946	0.0	0.0	0.0	39.0	0.0	0.0	0.0	0.0	39.0	0.0	27.0	0.0	0.0	0.0	0.0	0.0	0.0	0.0	0.0	0.0	0.0	0.0	0.0	0.0	0.0	0.0	0.0	0.0	0.0	0.0	0.0
OTU 947	0.0	0.0	0.0	13.0	0.0	0.0	0.0	22.0	8.0	0.0	0.0	0.0	0.0	30.0	0.0	0.0	0.0	0.0	0.0	0.0	0.0	21.0	0.0	11.0	0.0	0.0	0.0	0.0	0.0	0.0	0.0
OTU 948	0.0	0.0	0.0	0.0	45.0	0.0	0.0	0.0	0.0	0.0	0.0	0.0	0.0	0.0	0.0	0.0	0.0	0.0	0.0	0.0	0.0	0.0	60.0	0.0	0.0	0.0	0.0	0.0	0.0	0.0	0.0
OTU 949	0.0	0.0	0.0	0.0	11.0	14.0	0.0	0.0	0.0	18.0	0.0	0.0	0.0	0.0	0.0	0.0	0.0	0.0	0.0	6.0	0.0	0.0	11.0	37.0	8.0	0.0	0.0	0.0	0.0	0.0	0.0
OTU 950	0.0	0.0	0.0	0.0	0.0	0.0	0.0	105.0	0.0	0.0	0.0	0.0	0.0	0.0	0.0	0.0	0.0	0.0	0.0	0.0	0.0	0.0	0.0	0.0	0.0	0.0	0.0	0.0	0.0	0.0	0.0
OTU 951	0.0	0.0	0.0	0.0	0.0	0.0	0.0	11.0	6.0	0.0	0.0	12.0	0.0	8.0	3.0	0.0	0.0	0.0	0.0	14.0	9.0	16.0	0.0	0.0	0.0	0.0	0.0	0.0	0.0	9.0	17.0
OTU 952	0.0	0.0	0.0	0.0	0.0	0.0	0.0	0.0	0.0	0.0	0.0	25.0	0.0	0.0	0.0	0.0	19.0	12.0	0.0	0.0	31.0	0.0	0.0	0.0	0.0	0.0	0.0	0.0	0.0	18.0	0.0
OTU 953	0.0	0.0	0.0	0.0	0.0	0.0	0.0	0.0	0.0	0.0	0.0	0.0	0.0	0.0	39.0	0.0	0.0	0.0	0.0	0.0	0.0	0.0	0.0	0.0	0.0	0.0	0.0	0.0	0.0	66.0	0.0
OTU 954	0.0	0.0	0.0	0.0	0.0	0.0	0.0	0.0	0.0	0.0	0.0	0.0	0.0	0.0	9.0	0.0	0.0	0.0	0.0	0.0	70.0	0.0	0.0	0.0	26.0	0.0	0.0	0.0	0.0	0.0	0.0
OTU 955	0.0	0.0	0.0	0.0	0.0	0.0	0.0	0.0	0.0	0.0	0.0	0.0	0.0	0.0	0.0	105.0	0.0	0.0	0.0	0.0	0.0	0.0	0.0	0.0	0.0	0.0	0.0	0.0	0.0	0.0	0.0
OTU 956	0.0	0.0	0.0	0.0	0.0	0.0	0.0	0.0	0.0	0.0	0.0	0.0	0.0	0.0	0.0	0.0	0.0	0.0	0.0	0.0	105.0	0.0	0.0	0.0	0.0	0.0	0.0	0.0	0.0	0.0	0.0
OTU 957	0.0	15.0	0.0	0.0	0.0	0.0	0.0	64.0	0.0	0.0	0.0	0.0	25.0	0.0	0.0	0.0	0.0	0.0	0.0	0.0	0.0	0.0	0.0	0.0	0.0	0.0	0.0	0.0	0.0	0.0	0.0
OTU 958	0.0	0.0	0.0	10.0	0.0	0.0	18.0	0.0	0.0	0.0	11.0	0.0	0.0	0.0	0.0	0.0	0.0	0.0	0.0	0.0	0.0	0.0	0.0	0.0	0.0	0.0	0.0	0.0	39.0	26.0	0.0
OTU 959	0.0	0.0	0.0	0.0	0.0	17.0	0.0	31.0	8.0	0.0	0.0	20.0	0.0	0.0	0.0	0.0	0.0	0.0	0.0	6.0	7.0	0.0	0.0	0.0	0.0	0.0	0.0	0.0	0.0	15.0	0.0
OTU 960	0.0	0.0	0.0	0.0	0.0	0.0	0.0	0.0	0.0	0.0	0.0	0.0	0.0	9.0	0.0	28.0	0.0	49.0	0.0	0.0	0.0	18.0	0.0	0.0	0.0	0.0	0.0	0.0	0.0	0.0	0.0
OTU 961	0.0	0.0	0.0	0.0	0.0	0.0	0.0	0.0	0.0	0.0	0.0	0.0	0.0	0.0	0.0	0.0	0.0	0.0	0.0	22.0	0.0	0.0	0.0	82.0	0.0	0.0	0.0	0.0	0.0	0.0	0.0
OTU 962	0.0	0.0	0.0	0.0	0.0	0.0	0.0	0.0	0.0	0.0	0.0	0.0	0.0	0.0	0.0	0.0	0.0	0.0	0.0	0.0	0.0	0.0	0.0	0.0	0.0	0.0	0.0	0.0	0.0	0.0	104.0
OTU 963	0.0	0.0	0.0	0.0	0.0	0.0	0.0	6.0	0.0	0.0	0.0	0.0	0.0	0.0	0.0	0.0	0.0	0.0	0.0	0.0	60.0	0.0	37.0	0.0	0.0	0.0	0.0	0.0	0.0	0.0	0.0
OTU 964	0.0	0.0	0.0	0.0	0.0	0.0	0.0	0.0	0.0	0.0	65.0	11.0	0.0	0.0	0.0	0.0	0.0	0.0	0.0	0.0	0.0	0.0	0.0	0.0	0.0	0.0	0.0	0.0	0.0	0.0	27.0
OTU 965	0.0	0.0	0.0	0.0	0.0	0.0	0.0	0.0	0.0	0.0	0.0	14.0	0.0	0.0	0.0	0.0	0.0	0.0	0.0	0.0	0.0	0.0	0.0	0.0	0.0	0.0	0.0	0.0	0.0	89.0	0.0
OTU 966	0.0	0.0	0.0	0.0	0.0	0.0	0.0	0.0	0.0	0.0	0.0	0.0	0.0	0.0	0.0	0.0	0.0	103.0	0.0	0.0	0.0	0.0	0.0	0.0	0.0	0.0	0.0	0.0	0.0	0.0	0.0
OTU 967	0.0	0.0	0.0	0.0	0.0	0.0	0.0	0.0	0.0	0.0	0.0	0.0	0.0	0.0	0.0	0.0	0.0	0.0	0.0	0.0	0.0	0.0	0.0	0.0	103.0	0.0	0.0	0.0	0.0	0.0	0.0
OTU 968	0.0	0.0	0.0	0.0	0.0	0.0	0.0	0.0	0.0	0.0	0.0	0.0	0.0	0.0	0.0	0.0	0.0	0.0	0.0	0.0	0.0	0.0	0.0	0.0	0.0	64.0	0.0	39.0	0.0	0.0	0.0
OTU 969	0.0	0.0	26.0	0.0	0.0	0.0	0.0	0.0	0.0	0.0	0.0	0.0	0.0	0.0	0.0	0.0	0.0	0.0	0.0	0.0	13.0	0.0	63.0	0.0	0.0	0.0	0.0	0.0	0.0	0.0	0.0
OTU 970	0.0	0.0	0.0	0.0	0.0	102.0	0.0	0.0	0.0	0.0	0.0	0.0	0.0	0.0	0.0	0.0	0.0	0.0	0.0	0.0	0.0	0.0	0.0	0.0	0.0	0.0	0.0	0.0	0.0	0.0	0.0
OTU 971	0.0	0.0	0.0	0.0	0.0	0.0	25.0	0.0	0.0	0.0	0.0	77.0	0.0	0.0	0.0	0.0	0.0	0.0	0.0	0.0	0.0	0.0	0.0	0.0	0.0	0.0	0.0	0.0	0.0	0.0	0.0
OTU 972	0.0	0.0	0.0	0.0	0.0	0.0	0.0	0.0	0.0	0.0	0.0	75.0	0.0	0.0	0.0	27.0	0.0	0.0	0.0	0.0	0.0	0.0	0.0	0.0	0.0	0.0	0.0	0.0	0.0	0.0	0.0
OTU 973	0.0	0.0	0.0	0.0	0.0	0.0	0.0	0.0	0.0	0.0	0.0	0.0	0.0	0.0	0.0	0.0	0.0	0.0	0.0	0.0	0.0	0.0	0.0	0.0	102.0	0.0	0.0	0.0	0.0	0.0	0.0
OTU 974	0.0	0.0	0.0	0.0	0.0	0.0	0.0	0.0	0.0	0.0	0.0	0.0	0.0	0.0	0.0	0.0	0.0	0.0	0.0	0.0	0.0	0.0	0.0	0.0	0.0	0.0	0.0	0.0	0.0	0.0	102.0
OTU 975	0.0	0.0	0.0	0.0	101.0	0.0	0.0	0.0	0.0	0.0	0.0	0.0	0.0	0.0	0.0	0.0	0.0	0.0	0.0	0.0	0.0	0.0	0.0	0.0	0.0	0.0	0.0	0.0	0.0	0.0	0.0
OTU 976	0.0	0.0	0.0	0.0	37.0	0.0	0.0	0.0	0.0	0.0	0.0	0.0	0.0	0.0	0.0	0.0	0.0	0.0	0.0	0.0	0.0	0.0	0.0	64.0	0.0	0.0	0.0	0.0	0.0	0.0	0.0
OTU 977	0.0	0.0	0.0	0.0	13.0	4.0	0.0	0.0	0.0	12.0	0.0	0.0	26.0	0.0	0.0	0.0	0.0	0.0	0.0	0.0	0.0	11.0	5.0	12.0	18.0	0.0	0.0	0.0	0.0	0.0	0.0
OTU 978	0.0	0.0	0.0	0.0	0.0	11.0	0.0	23.0	13.0	0.0	0.0	18.0	0.0	0.0	0.0	0.0	0.0	0.0	0.0	0.0	0.0	0.0	0.0	0.0	0.0	0.0	7.0	0.0	0.0	15.0	14.0
OTU 979	0.0	0.0	0.0	0.0	0.0	0.0	48.0	0.0	0.0	0.0	0.0	0.0	0.0	0.0	0.0	0.0	0.0	0.0	41.0	0.0	0.0	12.0	0.0	0.0	0.0	0.0	0.0	0.0	0.0	0.0	0.0
OTU 980	0.0	0.0	0.0	0.0	0.0	0.0	0.0	27.0	0.0	0.0	0.0	0.0	0.0	0.0	27.0	0.0	0.0	0.0	0.0	34.0	0.0	13.0	0.0	0.0	0.0	0.0	0.0	0.0	0.0	0.0	0.0
OTU 981	0.0	0.0	0.0	0.0	0.0	0.0	0.0	0.0	0.0	0.0	0.0	54.0	0.0	0.0	0.0	0.0	0.0	0.0	0.0	0.0	0.0	0.0	0.0	0.0	0.0	0.0	0.0	0.0	47.0	0.0	0.0
OTU 982	0.0	16.0	0.0	0.0	0.0	0.0	9.0	20.0	44.0	0.0	0.0	0.0	0.0	0.0	0.0	0.0	0.0	0.0	0.0	0.0	6.0	0.0	0.0	0.0	0.0	5.0	0.0	0.0	0.0	0.0	0.0
OTU 983	0.0	0.0	49.0	0.0	0.0	0.0	0.0	0.0	0.0	0.0	0.0	0.0	0.0	0.0	0.0	0.0	0.0	0.0	0.0	0.0	0.0	0.0	51.0	0.0	0.0	0.0	0.0	0.0	0.0	0.0	0.0
OTU 984	0.0	0.0	0.0	100.0	0.0	0.0	0.0	0.0	0.0	0.0	0.0	0.0	0.0	0.0	0.0	0.0	0.0	0.0	0.0	0.0	0.0	0.0	0.0	0.0	0.0	0.0	0.0	0.0	0.0	0.0	0.0
OTU 985	0.0	0.0	0.0	4.0	60.0	0.0	0.0	0.0	25.0	0.0	0.0	0.0	0.0	0.0	0.0	0.0	0.0	0.0	0.0	0.0	0.0	5.0	0.0	6.0	0.0	0.0	0.0	0.0	0.0	0.0	0.0
OTU 986	0.0	0.0	0.0	0.0	0.0	0.0	0.0	0.0	0.0	0.0	0.0	0.0	0.0	0.0	0.0	100.0	0.0	0.0	0.0	0.0	0.0	0.0	0.0	0.0	0.0	0.0	0.0	0.0	0.0	0.0	0.0
OTU 987	0.0	0.0	0.0	0.0	0.0	0.0	0.0	0.0	0.0	0.0	0.0	0.0	0.0	0.0	0.0	0.0	0.0	0.0	30.0	0.0	0.0	0.0	0.0	0.0	0.0	0.0	0.0	0.0	0.0	0.0	70.0
OTU 988	99.0	0.0	0.0	0.0	0.0	0.0	0.0	0.0	0.0	0.0	0.0	0.0	0.0	0.0	0.0	0.0	0.0	0.0	0.0	0.0	0.0	0.0	0.0	0.0	0.0	0.0	0.0	0.0	0.0	0.0	0.0
OTU 989	0.0	0.0	0.0	0.0	40.0	0.0	0.0	0.0	0.0	0.0	0.0	0.0	0.0	0.0	0.0	0.0	0.0	0.0	0.0	0.0	0.0	0.0	0.0	0.0	0.0	0.0	59.0	0.0	0.0	0.0	0.0
OTU 990	0.0	0.0	0.0	0.0	0.0	14.0	0.0	26.0	17.0	0.0	0.0	7.0	0.0	0.0	0.0	0.0	0.0	0.0	0.0	15.0	14.0	0.0	0.0	0.0	0.0	0.0	0.0	0.0	0.0	6.0	0.0
OTU 991	0.0	0.0	0.0	0.0	0.0	0.0	0.0	0.0	0.0	0.0	0.0	0.0	32.0	67.0	0.0	0.0	0.0	0.0	0.0	0.0	0.0	0.0	0.0	0.0	0.0	0.0	0.0	0.0	0.0	0.0	0.0
OTU 992	0.0	0.0	0.0	0.0	0.0	0.0	0.0	0.0	0.0	0.0	0.0	0.0	0.0	0.0	0.0	0.0	0.0	0.0	0.0	29.0	0.0	0.0	0.0	0.0	0.0	0.0	0.0	0.0	0.0	70.0	0.0
OTU 993	0.0	0.0	0.0	0.0	0.0	0.0	0.0	0.0	0.0	0.0	0.0	0.0	0.0	0.0	0.0	0.0	0.0	0.0	0.0	0.0	0.0	99.0	0.0	0.0	0.0	0.0	0.0	0.0	0.0	0.0	0.0
OTU 994	0.0	0.0	0.0	0.0	0.0	0.0	0.0	0.0	0.0	0.0	0.0	0.0	0.0	0.0	0.0	0.0	0.0	0.0	0.0	0.0	0.0	0.0	0.0	81.0	0.0	0.0	0.0	18.0	0.0	0.0	0.0
OTU 995	13.0	17.0	0.0	0.0	0.0	0.0	0.0	0.0	0.0	0.0	0.0	0.0	0.0	0.0	0.0	0.0	10.0	12.0	0.0	0.0	0.0	0.0	0.0	0.0	46.0	0.0	0.0	0.0	0.0	0.0	0.0
OTU 996	0.0	17.0	0.0	0.0	0.0	0.0	4.0	0.0	0.0	0.0	37.0	0.0	0.0	0.0	0.0	0.0	0.0	0.0	18.0	0.0	0.0	0.0	0.0	0.0	0.0	0.0	0.0	0.0	22.0	0.0	0.0
OTU 997	0.0	0.0	0.0	0.0	10.0	0.0	0.0	17.0	17.0	0.0	0.0	18.0	0.0	0.0	0.0	7.0	0.0	0.0	0.0	0.0	8.0	0.0	0.0	15.0	0.0	0.0	0.0	0.0	6.0	0.0	0.0
OTU 998	0.0	0.0	0.0	0.0	0.0	79.0	0.0	0.0	0.0	0.0	0.0	0.0	0.0	0.0	0.0	0.0	0.0	0.0	0.0	0.0	0.0	0.0	19.0	0.0	0.0	0.0	0.0	0.0	0.0	0.0	0.0
OTU 999	0.0	0.0	0.0	0.0	0.0	9.0	0.0	56.0	0.0	0.0	0.0	0.0	0.0	0.0	0.0	0.0	0.0	0.0	0.0	0.0	0.0	0.0	0.0	0.0	33.0	0.0	0.0	0.0	0.0	0.0	0.0
OTU 1000	0.0	0.0	0.0	0.0	0.0	0.0	0.0	0.0	0.0	0.0	0.0	0.0	0.0	0.0	30.0	0.0	0.0	0.0	0.0	0.0	0.0	0.0	0.0	0.0	0.0	68.0	0.0	0.0	0.0	0.0	0.0
OTU 1001	0.0	0.0	0.0	12.0	0.0	0.0	0.0	0.0	0.0	6.0	0.0	0.0	0.0	0.0	0.0	0.0	0.0	0.0	0.0	0.0	0.0	0.0	79.0	0.0	0.0	0.0	0.0	0.0	0.0	0.0	0.0
OTU 1002	0.0	0.0	0.0	0.0	97.0	0.0	0.0	0.0	0.0	0.0	0.0	0.0	0.0	0.0	0.0	0.0	0.0	0.0	0.0	0.0	0.0	0.0	0.0	0.0	0.0	0.0	0.0	0.0	0.0	0.0	0.0
OTU 1003	0.0	0.0	0.0	0.0	36.0	0.0	23.0	0.0	28.0	0.0	10.0	0.0	0.0	0.0	0.0	0.0	0.0	0.0	0.0	0.0	0.0	0.0	0.0	0.0	0.0	0.0	0.0	0.0	0.0	0.0	0.0
OTU 1004	0.0	0.0	0.0	0.0	26.0	0.0	0.0	0.0	0.0	0.0	0.0	0.0	0.0	0.0	0.0	0.0	0.0	0.0	0.0	0.0	0.0	0.0	20.0	0.0	0.0	29.0	0.0	22.0	0.0	0.0	0.0
OTU 1005	0.0	0.0	0.0	0.0	0.0	24.0	0.0	0.0	0.0	20.0	0.0	0.0	0.0	0.0	0.0	9.0	0.0	17.0	0.0	8.0	0.0	0.0	0.0	0.0	19.0	0.0	0.0	0.0	0.0	0.0	0.0
OTU 1006	0.0	0.0	0.0	0.0	0.0	0.0	0.0	0.0	0.0	0.0	0.0	64.0	0.0	0.0	33.0	0.0	0.0	0.0	0.0	0.0	0.0	0.0	0.0	0.0	0.0	0.0	0.0	0.0	0.0	0.0	0.0
OTU 1007	0.0	0.0	0.0	0.0	0.0	0.0	0.0	0.0	0.0	0.0	0.0	0.0	18.0	0.0	0.0	0.0	0.0	0.0	0.0	0.0	0.0	0.0	0.0	0.0	79.0	0.0	0.0	0.0	0.0	0.0	0.0
OTU 1008	0.0	0.0	0.0	0.0	0.0	0.0	0.0	0.0	0.0	0.0	0.0	0.0	0.0	0.0	0.0	0.0	0.0	0.0	0.0	97.0	0.0	0.0	0.0	0.0	0.0	0.0	0.0	0.0	0.0	0.0	0.0
OTU 1009	0.0	0.0	0.0	0.0	0.0	0.0	0.0	0.0	0.0	0.0	0.0	0.0	0.0	0.0	0.0	0.0	0.0	0.0	0.0	0.0	0.0	97.0	0.0	0.0	0.0	0.0	0.0	0.0	0.0	0.0	0.0
OTU 1010	0.0	0.0	0.0	0.0	0.0	0.0	0.0	0.0	0.0	0.0	0.0	0.0	0.0	0.0	0.0	0.0	0.0	0.0	0.0	0.0	0.0	0.0	0.0	97.0	0.0	0.0	0.0	0.0	0.0	0.0	0.0
OTU 1011	0.0	0.0	0.0	0.0	0.0	0.0	0.0	0.0	0.0	0.0	0.0	0.0	0.0	0.0	0.0	0.0	0.0	0.0	0.0	0.0	0.0	0.0	0.0	0.0	0.0	97.0	0.0	0.0	0.0	0.0	0.0
OTU 1012	42.0	0.0	0.0	0.0	0.0	0.0	36.0	0.0	18.0	0.0	0.0	0.0	0.0	0.0	0.0	0.0	0.0	0.0	0.0	0.0	0.0	0.0	0.0	0.0	0.0	0.0	0.0	0.0	0.0	0.0	0.0
OTU 1013	0.0	0.0	51.0	0.0	0.0	0.0	0.0	0.0	0.0	0.0	0.0	0.0	0.0	0.0	0.0	0.0	0.0	0.0	0.0	0.0	0.0	0.0	0.0	20.0	25.0	0.0	0.0	0.0	0.0	0.0	0.0
OTU 1014	0.0	0.0	0.0	25.0	22.0	0.0	0.0	0.0	0.0	0.0	0.0	0.0	0.0	0.0	0.0	40.0	0.0	0.0	0.0	0.0	0.0	0.0	0.0	0.0	9.0	0.0	0.0	0.0	0.0	0.0	0.0
OTU 1015	0.0	0.0	0.0	0.0	22.0	0.0	0.0	0.0	33.0	0.0	0.0	0.0	0.0	0.0	0.0	0.0	0.0	0.0	0.0	0.0	0.0	32.0	0.0	0.0	9.0	0.0	0.0	0.0	0.0	0.0	0.0
OTU 1016	0.0	0.0	0.0	0.0	0.0	12.0	8.0	0.0	0.0	0.0	9.0	19.0	0.0	0.0	0.0	11.0	0.0	0.0	0.0	0.0	0.0	0.0	0.0	0.0	0.0	14.0	0.0	8.0	0.0	15.0	0.0
OTU 1017	0.0	0.0	0.0	0.0	0.0	7.0	0.0	22.0	7.0	0.0	0.0	13.0	0.0	0.0	0.0	0.0	0.0	0.0	0.0	0.0	0.0	0.0	0.0	0.0	0.0	0.0	20.0	0.0	0.0	13.0	14.0
OTU 1018	0.0	0.0	0.0	0.0	0.0	0.0	65.0	0.0	0.0	0.0	31.0	0.0	0.0	0.0	0.0	0.0	0.0	0.0	0.0	0.0	0.0	0.0	0.0	0.0	0.0	0.0	0.0	0.0	0.0	0.0	0.0
OTU 1019	0.0	0.0	0.0	0.0	0.0	0.0	0.0	46.0	20.0	0.0	0.0	0.0	0.0	0.0	0.0	0.0	0.0	0.0	0.0	9.0	0.0	21.0	0.0	0.0	0.0	0.0	0.0	0.0	0.0	0.0	0.0
OTU 1020	0.0	0.0	0.0	0.0	0.0	0.0	0.0	0.0	52.0	0.0	0.0	0.0	0.0	0.0	0.0	0.0	0.0	0.0	0.0	0.0	0.0	0.0	0.0	27.0	17.0	0.0	0.0	0.0	0.0	0.0	0.0
OTU 1021	0.0	0.0	0.0	0.0	0.0	0.0	0.0	0.0	0.0	0.0	0.0	96.0	0.0	0.0	0.0	0.0	0.0	0.0	0.0	0.0	0.0	0.0	0.0	0.0	0.0	0.0	0.0	0.0	0.0	0.0	0.0
OTU 1022	0.0	0.0	0.0	0.0	0.0	0.0	0.0	0.0	0.0	0.0	0.0	0.0	0.0	0.0	0.0	0.0	0.0	0.0	96.0	0.0	0.0	0.0	0.0	0.0	0.0	0.0	0.0	0.0	0.0	0.0	0.0
OTU 1023	0.0	0.0	0.0	0.0	0.0	0.0	0.0	0.0	0.0	0.0	0.0	0.0	0.0	0.0	0.0	0.0	0.0	0.0	0.0	0.0	0.0	96.0	0.0	0.0	0.0	0.0	0.0	0.0	0.0	0.0	0.0
OTU 1024	0.0	0.0	0.0	0.0	0.0	0.0	0.0	0.0	0.0	0.0	0.0	0.0	0.0	0.0	0.0	0.0	0.0	0.0	0.0	0.0	0.0	0.0	0.0	86.0	0.0	0.0	0.0	0.0	10.0	0.0	0.0
OTU 1025	95.0	0.0	0.0	0.0	0.0	0.0	0.0	0.0	0.0	0.0	0.0	0.0	0.0	0.0	0.0	0.0	0.0	0.0	0.0	0.0	0.0	0.0	0.0	0.0	0.0	0.0	0.0	0.0	0.0	0.0	0.0
OTU 1026	58.0	0.0	0.0	0.0	0.0	0.0	0.0	0.0	0.0	0.0	0.0	0.0	0.0	0.0	0.0	0.0	0.0	0.0	0.0	0.0	0.0	0.0	0.0	0.0	0.0	0.0	37.0	0.0	0.0	0.0	0.0
OTU 1027	27.0	0.0	0.0	0.0	0.0	0.0	0.0	0.0	0.0	0.0	0.0	0.0	0.0	0.0	0.0	0.0	0.0	0.0	0.0	0.0	0.0	0.0	0.0	0.0	0.0	68.0	0.0	0.0	0.0	0.0	0.0
OTU 1028	0.0	19.0	0.0	0.0	0.0	0.0	0.0	0.0	0.0	0.0	0.0	38.0	0.0	0.0	0.0	0.0	0.0	0.0	0.0	0.0	38.0	0.0	0.0	0.0	0.0	0.0	0.0	0.0	0.0	0.0	0.0
OTU 1029	0.0	0.0	6.0	0.0	0.0	0.0	0.0	0.0	0.0	0.0	36.0	0.0	0.0	0.0	0.0	0.0	0.0	0.0	0.0	0.0	0.0	0.0	0.0	0.0	0.0	0.0	0.0	0.0	0.0	53.0	0.0
OTU 1030	0.0	0.0	0.0	10.0	0.0	0.0	0.0	0.0	16.0	0.0	0.0	0.0	0.0	0.0	0.0	0.0	0.0	0.0	0.0	0.0	47.0	22.0	0.0	0.0	0.0	0.0	0.0	0.0	0.0	0.0	0.0
OTU 1031	0.0	0.0	0.0	0.0	0.0	0.0	0.0	0.0	0.0	0.0	95.0	0.0	0.0	0.0	0.0	0.0	0.0	0.0	0.0	0.0	0.0	0.0	0.0	0.0	0.0	0.0	0.0	0.0	0.0	0.0	0.0
OTU 1032	0.0	0.0	0.0	0.0	0.0	0.0	0.0	0.0	0.0	0.0	69.0	0.0	0.0	0.0	0.0	0.0	0.0	0.0	0.0	0.0	0.0	0.0	0.0	0.0	0.0	0.0	0.0	0.0	0.0	26.0	0.0
OTU 1033	0.0	0.0	0.0	0.0	0.0	0.0	0.0	0.0	0.0	0.0	0.0	0.0	0.0	0.0	0.0	0.0	0.0	0.0	0.0	0.0	48.0	0.0	0.0	0.0	47.0	0.0	0.0	0.0	0.0	0.0	0.0
OTU 1034	0.0	0.0	0.0	0.0	0.0	21.0	0.0	0.0	0.0	37.0	0.0	0.0	0.0	0.0	0.0	0.0	0.0	0.0	0.0	0.0	0.0	0.0	0.0	0.0	36.0	0.0	0.0	0.0	0.0	0.0	0.0
OTU 1035	0.0	0.0	0.0	0.0	0.0	0.0	0.0	0.0	94.0	0.0	0.0	0.0	0.0	0.0	0.0	0.0	0.0	0.0	0.0	0.0	0.0	0.0	0.0	0.0	0.0	0.0	0.0	0.0	0.0	0.0	0.0
OTU 1036	0.0	0.0	0.0	0.0	0.0	0.0	0.0	0.0	37.0	0.0	0.0	0.0	0.0	0.0	0.0	0.0	0.0	0.0	0.0	0.0	0.0	0.0	0.0	0.0	57.0	0.0	0.0	0.0	0.0	0.0	0.0
OTU 1037	0.0	0.0	0.0	0.0	0.0	0.0	0.0	0.0	0.0	0.0	37.0	0.0	0.0	0.0	0.0	0.0	0.0	0.0	0.0	0.0	0.0	0.0	0.0	57.0	0.0	0.0	0.0	0.0	0.0	0.0	0.0
OTU 1038	0.0	0.0	0.0	0.0	0.0	0.0	0.0	0.0	0.0	0.0	0.0	94.0	0.0	0.0	0.0	0.0	0.0	0.0	0.0	0.0	0.0	0.0	0.0	0.0	0.0	0.0	0.0	0.0	0.0	0.0	0.0
OTU 1039	0.0	93.0	0.0	0.0	0.0	0.0	0.0	0.0	0.0	0.0	0.0	0.0	0.0	0.0	0.0	0.0	0.0	0.0	0.0	0.0	0.0	0.0	0.0	0.0	0.0	0.0	0.0	0.0	0.0	0.0	0.0
OTU 1040	0.0	10.0	0.0	0.0	0.0	0.0	0.0	0.0	0.0	0.0	0.0	8.0	0.0	26.0	0.0	3.0	0.0	0.0	0.0	0.0	10.0	0.0	7.0	14.0	15.0	0.0	0.0	0.0	0.0	0.0	0.0
OTU 1041	0.0	0.0	0.0	0.0	15.0	3.0	9.0	0.0	0.0	0.0	0.0	3.0	0.0	0.0	0.0	0.0	0.0	0.0	0.0	0.0	0.0	0.0	0.0	0.0	0.0	9.0	0.0	9.0	0.0	0.0	45.0
OTU 1042	0.0	0.0	0.0	0.0	13.0	0.0	0.0	0.0	0.0	0.0	0.0	0.0	0.0	0.0	0.0	0.0	0.0	0.0	0.0	0.0	0.0	58.0	0.0	0.0	22.0	0.0	0.0	0.0	0.0	0.0	0.0
OTU 1043	0.0	0.0	0.0	0.0	0.0	9.0	0.0	0.0	0.0	23.0	0.0	0.0	36.0	0.0	0.0	12.0	8.0	5.0	0.0	0.0	0.0	0.0	0.0	0.0	0.0	0.0	0.0	0.0	0.0	0.0	0.0
OTU 1044	0.0	0.0	0.0	0.0	0.0	0.0	0.0	0.0	45.0	48.0	0.0	0.0	0.0	0.0	0.0	0.0	0.0	0.0	0.0	0.0	0.0	0.0	0.0	0.0	0.0	0.0	0.0	0.0	0.0	0.0	0.0
OTU 1045	0.0	0.0	0.0	0.0	0.0	0.0	0.0	0.0	0.0	0.0	0.0	0.0	0.0	48.0	0.0	0.0	0.0	0.0	0.0	0.0	0.0	0.0	0.0	0.0	0.0	0.0	45.0	0.0	0.0	0.0	0.0
OTU 1046	0.0	0.0	0.0	0.0	0.0	0.0	0.0	0.0	0.0	0.0	0.0	0.0	0.0	0.0	0.0	93.0	0.0	0.0	0.0	0.0	0.0	0.0	0.0	0.0	0.0	0.0	0.0	0.0	0.0	0.0	0.0
OTU 1047	0.0	0.0	0.0	0.0	0.0	0.0	0.0	0.0	0.0	0.0	0.0	0.0	0.0	0.0	0.0	0.0	0.0	0.0	93.0	0.0	0.0	0.0	0.0	0.0	0.0	0.0	0.0	0.0	0.0	0.0	0.0
OTU 1048	0.0	0.0	0.0	0.0	0.0	0.0	0.0	0.0	0.0	0.0	0.0	0.0	0.0	0.0	0.0	0.0	0.0	0.0	0.0	0.0	0.0	0.0	0.0	0.0	93.0	0.0	0.0	0.0	0.0	0.0	0.0
OTU 1049	11.0	14.0	0.0	0.0	0.0	0.0	0.0	0.0	0.0	0.0	0.0	0.0	0.0	0.0	0.0	0.0	20.0	12.0	0.0	24.0	0.0	0.0	0.0	0.0	11.0	0.0	0.0	0.0	0.0	0.0	0.0
OTU 1050	0.0	0.0	0.0	0.0	8.0	20.0	0.0	0.0	0.0	16.0	0.0	0.0	0.0	0.0	0.0	20.0	0.0	0.0	0.0	17.0	0.0	0.0	0.0	0.0	11.0	0.0	0.0	0.0	0.0	0.0	0.0
OTU 1051	0.0	0.0	0.0	0.0	0.0	0.0	0.0	60.0	0.0	0.0	0.0	0.0	0.0	0.0	0.0	0.0	0.0	0.0	0.0	0.0	0.0	0.0	0.0	0.0	0.0	32.0	0.0	0.0	0.0	0.0	0.0
OTU 1052	0.0	0.0	0.0	42.0	0.0	0.0	0.0	0.0	0.0	0.0	0.0	0.0	0.0	0.0	0.0	0.0	0.0	0.0	0.0	0.0	0.0	0.0	0.0	0.0	49.0	0.0	0.0	0.0	0.0	0.0	0.0
OTU 1053	0.0	0.0	0.0	0.0	16.0	1.0	18.0	0.0	0.0	0.0	18.0	0.0	0.0	4.0	0.0	0.0	0.0	0.0	0.0	0.0	6.0	0.0	0.0	0.0	0.0	0.0	28.0	0.0	0.0	0.0	0.0
OTU 1054	0.0	0.0	0.0	0.0	0.0	91.0	0.0	0.0	0.0	0.0	0.0	0.0	0.0	0.0	0.0	0.0	0.0	0.0	0.0	0.0	0.0	0.0	0.0	0.0	0.0	0.0	0.0	0.0	0.0	0.0	0.0
OTU 1055	0.0	0.0	0.0	0.0	0.0	0.0	91.0	0.0	0.0	0.0	0.0	0.0	0.0	0.0	0.0	0.0	0.0	0.0	0.0	0.0	0.0	0.0	0.0	0.0	0.0	0.0	0.0	0.0	0.0	0.0	0.0
OTU 1056	0.0	0.0	0.0	0.0	0.0	0.0	16.0	0.0	0.0	0.0	24.0	11.0	0.0	0.0	0.0	0.0	0.0	0.0	0.0	0.0	0.0	11.0	0.0	0.0	0.0	0.0	0.0	0.0	0.0	29.0	0.0
OTU 1057	0.0	0.0	0.0	0.0	0.0	0.0	0.0	15.0	0.0	0.0	0.0	0.0	0.0	0.0	54.0	0.0	0.0	0.0	0.0	0.0	0.0	0.0	0.0	0.0	0.0	0.0	0.0	0.0	0.0	22.0	0.0
OTU 1058	0.0	0.0	0.0	0.0	0.0	0.0	0.0	0.0	0.0	91.0	0.0	0.0	0.0	0.0	0.0	0.0	0.0	0.0	0.0	0.0	0.0	0.0	0.0	0.0	0.0	0.0	0.0	0.0	0.0	0.0	0.0
OTU 1059	0.0	0.0	0.0	0.0	0.0	0.0	0.0	0.0	0.0	0.0	0.0	0.0	0.0	0.0	0.0	0.0	0.0	0.0	0.0	0.0	0.0	0.0	0.0	0.0	91.0	0.0	0.0	0.0	0.0	0.0	0.0
OTU 1060	0.0	0.0	0.0	0.0	0.0	0.0	0.0	0.0	0.0	0.0	0.0	0.0	0.0	0.0	0.0	0.0	0.0	0.0	0.0	0.0	0.0	0.0	0.0	0.0	91.0	0.0	0.0	0.0	0.0	0.0	0.0
OTU 1061	11.0	5.0	0.0	0.0	0.0	0.0	0.0	0.0	10.0	0.0	0.0	0.0	0.0	2.0	0.0	0.0	0.0	0.0	0.0	0.0	4.0	14.0	7.0	7.0	20.0	0.0	10.0	0.0	0.0	0.0	0.0
OTU 1062	0.0	0.0	0.0	0.0	21.0	0.0	0.0	0.0	0.0	0.0	0.0	0.0	0.0	33.0	0.0	0.0	0.0	0.0	0.0	0.0	0.0	0.0	0.0	0.0	0.0	0.0	0.0	36.0	0.0	0.0	0.0
OTU 1063	0.0	0.0	0.0	0.0	4.0	0.0	0.0	0.0	0.0	0.0	0.0	0.0	0.0	0.0	0.0	0.0	0.0	0.0	0.0	0.0	41.0	0.0	0.0	0.0	45.0	0.0	0.0	0.0	0.0	0.0	0.0
OTU 1064	0.0	0.0	0.0	0.0	0.0	0.0	90.0	0.0	0.0	0.0	0.0	0.0	0.0	0.0	0.0	0.0	0.0	0.0	0.0	0.0	0.0	0.0	0.0	0.0	0.0	0.0	0.0	0.0	0.0	0.0	0.0
OTU 1065	0.0	0.0	0.0	0.0	0.0	0.0	0.0	15.0	0.0	0.0	0.0	0.0	10.0	0.0	23.0	0.0	8.0	10.0	0.0	9.0	0.0	0.0	0.0	15.0	0.0	0.0	0.0	0.0	0.0	0.0	0.0
OTU 1066	0.0	0.0	0.0	0.0	0.0	0.0	0.0	0.0	0.0	0.0	0.0	0.0	0.0	0.0	0.0	0.0	0.0	0.0	90.0	0.0	0.0	0.0	0.0	0.0	0.0	0.0	0.0	0.0	0.0	0.0	0.0
OTU 1067	0.0	0.0	0.0	0.0	0.0	0.0	0.0	0.0	0.0	0.0	0.0	0.0	0.0	0.0	0.0	0.0	0.0	0.0	87.0	0.0	0.0	0.0	0.0	0.0	0.0	0.0	0.0	0.0	0.0	3.0	0.0
OTU 1068	0.0	0.0	0.0	0.0	0.0	0.0	0.0	0.0	0.0	0.0	0.0	0.0	0.0	0.0	0.0	0.0	0.0	0.0	0.0	0.0	0.0	90.0	0.0	0.0	0.0	0.0	0.0	0.0	0.0	0.0	0.0
OTU 1069	0.0	0.0	0.0	0.0	0.0	0.0	0.0	0.0	0.0	0.0	0.0	0.0	0.0	0.0	0.0	0.0	0.0	0.0	0.0	0.0	0.0	0.0	90.0	0.0	0.0	0.0	0.0	0.0	0.0	0.0	0.0
OTU 1070	0.0	0.0	0.0	0.0	0.0	0.0	0.0	0.0	0.0	0.0	0.0	0.0	0.0	0.0	0.0	0.0	0.0	0.0	0.0	0.0	0.0	0.0	0.0	0.0	0.0	90.0	0.0	0.0	0.0	0.0	0.0
OTU 1071	0.0	0.0	0.0	0.0	0.0	0.0	0.0	0.0	0.0	0.0	0.0	0.0	0.0	0.0	0.0	0.0	0.0	0.0	0.0	0.0	0.0	0.0	0.0	0.0	0.0	56.0	0.0	34.0	0.0	0.0	0.0
OTU 1072	6.0	0.0	0.0	0.0	0.0	0.0	0.0	0.0	7.0	0.0	0.0	0.0	10.0	16.0	0.0	33.0	0.0	0.0	0.0	0.0	0.0	0.0	2.0	12.0	3.0	0.0	0.0	0.0	0.0	0.0	0.0
OTU 1073	0.0	0.0	0.0	0.0	89.0	0.0	0.0	0.0	0.0	0.0	0.0	0.0	0.0	0.0	0.0	0.0	0.0	0.0	0.0	0.0	0.0	0.0	0.0	0.0	0.0	0.0	0.0	0.0	0.0	0.0	0.0
OTU 1074	0.0	0.0	0.0	0.0	0.0	42.0	8.0	0.0	0.0	0.0	0.0	0.0	0.0	0.0	0.0	14.0	25.0	0.0	0.0	0.0	0.0	0.0	0.0	0.0	0.0	0.0	0.0	0.0	0.0	0.0	0.0
OTU 1075	0.0	0.0	0.0	0.0	0.0	13.0	0.0	30.0	13.0	0.0	0.0	7.0	0.0	0.0	0.0	0.0	0.0	0.0	0.0	0.0	0.0	0.0	0.0	0.0	0.0	0.0	13.0	0.0	0.0	7.0	6.0
OTU 1076	0.0	0.0	0.0	0.0	0.0	0.0	0.0	0.0	0.0	49.0	0.0	0.0	0.0	0.0	0.0	0.0	0.0	0.0	0.0	0.0	0.0	0.0	0.0	0.0	40.0	0.0	0.0	0.0	0.0	0.0	0.0
OTU 1077	7.0	0.0	0.0	0.0	18.0	16.0	0.0	0.0	0.0	0.0	0.0	25.0	0.0	22.0	0.0	0.0	0.0	0.0	0.0	0.0	0.0	0.0	0.0	0.0	0.0	0.0	0.0	0.0	0.0	0.0	0.0
OTU 1078	0.0	0.0	0.0	18.0	21.0	0.0	0.0	0.0	0.0	0.0	0.0	0.0	0.0	0.0	0.0	0.0	15.0	0.0	0.0	0.0	0.0	0.0	10.0	0.0	24.0	0.0	0.0	0.0	0.0	0.0	0.0
OTU 1079	0.0	0.0	0.0	0.0	88.0	0.0	0.0	0.0	0.0	0.0	0.0	0.0	0.0	0.0	0.0	0.0	0.0	0.0	0.0	0.0	0.0	0.0	0.0	0.0	0.0	0.0	0.0	0.0	0.0	0.0	0.0
OTU 1080	0.0	0.0	0.0	0.0	0.0	0.0	0.0	29.0	29.0	0.0	0.0	0.0	0.0	0.0	0.0	0.0	0.0	0.0	0.0	14.0	0.0	16.0	0.0	0.0	0.0	0.0	0.0	0.0	0.0	0.0	0.0
OTU 1081	0.0	0.0	0.0	0.0	0.0	0.0	0.0	0.0	0.0	0.0	0.0	0.0	0.0	0.0	0.0	0.0	0.0	0.0	0.0	0.0	0.0	0.0	12.0	0.0	49.0	22.0	0.0	5.0	0.0	0.0	0.0
OTU 1082	0.0	0.0	0.0	0.0	0.0	0.0	0.0	0.0	0.0	0.0	0.0	0.0	0.0	0.0	0.0	0.0	0.0	0.0	0.0	0.0	0.0	0.0	0.0	0.0	0.0	0.0	0.0	0.0	0.0	88.0	0.0
OTU 1083	33.0	0.0	2.0	0.0	0.0	0.0	0.0	0.0	0.0	0.0	0.0	0.0	0.0	0.0	0.0	0.0	0.0	0.0	0.0	0.0	0.0	0.0	0.0	0.0	29.0	0.0	23.0	0.0	0.0	0.0	0.0
OTU 1084	8.0	0.0	0.0	0.0	16.0	25.0	0.0	0.0	0.0	0.0	0.0	26.0	0.0	12.0	0.0	0.0	0.0	0.0	0.0	0.0	0.0	0.0	0.0	0.0	0.0	0.0	0.0	0.0	0.0	0.0	0.0
OTU 1085	0.0	0.0	0.0	0.0	87.0	0.0	0.0	0.0	0.0	0.0	0.0	0.0	0.0	0.0	0.0	0.0	0.0	0.0	0.0	0.0	0.0	0.0	0.0	0.0	0.0	0.0	0.0	0.0	0.0	0.0	0.0
OTU 1086	0.0	0.0	0.0	0.0	49.0	0.0	0.0	0.0	0.0	0.0	0.0	0.0	38.0	0.0	0.0	0.0	0.0	0.0	0.0	0.0	0.0	0.0	0.0	0.0	0.0	0.0	0.0	0.0	0.0	0.0	0.0
OTU 1087	0.0	0.0	0.0	0.0	0.0	0.0	19.0	0.0	0.0	0.0	0.0	0.0	0.0	0.0	0.0	0.0	0.0	0.0	0.0	0.0	34.0	0.0	0.0	0.0	0.0	0.0	12.0	0.0	0.0	0.0	22.0
OTU 1088	0.0	0.0	0.0	0.0	0.0	0.0	0.0	0.0	0.0	0.0	0.0	0.0	0.0	87.0	0.0	0.0	0.0	0.0	0.0	0.0	0.0	0.0	0.0	0.0	0.0	0.0	0.0	0.0	0.0	0.0	0.0
OTU 1089	0.0	0.0	0.0	0.0	0.0	0.0	0.0	0.0	0.0	0.0	0.0	0.0	0.0	0.0	0.0	0.0	0.0	0.0	0.0	0.0	0.0	0.0	87.0	0.0	0.0	0.0	0.0	0.0	0.0	0.0	0.0
OTU 1090	0.0	0.0	0.0	0.0	0.0	0.0	0.0	0.0	0.0	0.0	0.0	0.0	0.0	0.0	0.0	0.0	0.0	0.0	0.0	0.0	0.0	0.0	0.0	0.0	0.0	87.0	0.0	0.0	0.0	0.0	0.0
OTU 1091	0.0	0.0	0.0	0.0	0.0	0.0	0.0	0.0	0.0	0.0	0.0	0.0	0.0	0.0	0.0	0.0	0.0	0.0	0.0	0.0	0.0	0.0	0.0	0.0	0.0	0.0	0.0	0.0	0.0	0.0	87.0
OTU 1092	0.0	0.0	0.0	0.0	0.0	0.0	0.0	0.0	0.0	0.0	0.0	0.0	0.0	0.0	0.0	0.0	0.0	0.0	0.0	0.0	0.0	0.0	0.0	0.0	0.0	0.0	0.0	0.0	0.0	0.0	87.0
OTU 1093	86.0	0.0	0.0	0.0	0.0	0.0	0.0	0.0	0.0	0.0	0.0	0.0	0.0	0.0	0.0	0.0	0.0	0.0	0.0	0.0	0.0	0.0	0.0	0.0	0.0	0.0	0.0	0.0	0.0	0.0	0.0
OTU 1094	0.0	86.0	0.0	0.0	0.0	0.0	0.0	0.0	0.0	0.0	0.0	0.0	0.0	0.0	0.0	0.0	0.0	0.0	0.0	0.0	0.0	0.0	0.0	0.0	0.0	0.0	0.0	0.0	0.0	0.0	0.0
OTU 1095	0.0	0.0	0.0	0.0	86.0	0.0	0.0	0.0	0.0	0.0	0.0	0.0	0.0	0.0	0.0	0.0	0.0	0.0	0.0	0.0	0.0	0.0	0.0	0.0	0.0	0.0	0.0	0.0	0.0	0.0	0.0
OTU 1096	0.0	0.0	0.0	0.0	86.0	0.0	0.0	0.0	0.0	0.0	0.0	0.0	0.0	0.0	0.0	0.0	0.0	0.0	0.0	0.0	0.0	0.0	0.0	0.0	0.0	0.0	0.0	0.0	0.0	0.0	0.0
OTU 1097	0.0	0.0	0.0	0.0	25.0	0.0	0.0	0.0	0.0	0.0	0.0	0.0	0.0	0.0	0.0	0.0	5.0	4.0	0.0	52.0	0.0	0.0	0.0	0.0	0.0	0.0	0.0	0.0	0.0	0.0	0.0
OTU 1098	0.0	0.0	0.0	0.0	0.0	86.0	0.0	0.0	0.0	0.0	0.0	0.0	0.0	0.0	0.0	0.0	0.0	0.0	0.0	0.0	0.0	0.0	0.0	0.0	0.0	0.0	0.0	0.0	0.0	0.0	0.0
OTU 1099	0.0	0.0	0.0	0.0	0.0	0.0	0.0	0.0	0.0	63.0	0.0	0.0	0.0	0.0	0.0	0.0	0.0	0.0	0.0	0.0	0.0	0.0	0.0	0.0	0.0	0.0	0.0	0.0	23.0	0.0	0.0
OTU 1100	0.0	0.0	0.0	0.0	0.0	0.0	0.0	0.0	0.0	0.0	0.0	86.0	0.0	0.0	0.0	0.0	0.0	0.0	0.0	0.0	0.0	0.0	0.0	0.0	0.0	0.0	0.0	0.0	0.0	0.0	0.0
OTU 1101	0.0	0.0	0.0	0.0	0.0	0.0	0.0	0.0	0.0	0.0	0.0	0.0	23.0	0.0	0.0	0.0	19.0	0.0	0.0	0.0	0.0	0.0	0.0	0.0	0.0	0.0	0.0	44.0	0.0	0.0	0.0
OTU 1102	0.0	0.0	0.0	0.0	0.0	0.0	0.0	0.0	0.0	0.0	0.0	0.0	0.0	0.0	0.0	0.0	0.0	0.0	0.0	0.0	0.0	0.0	0.0	0.0	0.0	0.0	0.0	0.0	0.0	86.0	0.0
OTU 1103	0.0	0.0	32.0	0.0	0.0	0.0	0.0	0.0	0.0	0.0	0.0	0.0	0.0	37.0	0.0	0.0	0.0	0.0	0.0	0.0	16.0	0.0	0.0	0.0	0.0	0.0	0.0	0.0	0.0	0.0	0.0
OTU 1104	0.0	0.0	0.0	0.0	0.0	23.0	0.0	0.0	0.0	0.0	0.0	0.0	0.0	0.0	0.0	0.0	0.0	0.0	0.0	0.0	0.0	0.0	0.0	62.0	0.0	0.0	0.0	0.0	0.0	0.0	0.0
OTU 1105	0.0	0.0	0.0	0.0	0.0	0.0	0.0	0.0	0.0	0.0	0.0	54.0	0.0	0.0	0.0	31.0	0.0	0.0	0.0	0.0	0.0	0.0	0.0	0.0	0.0	0.0	0.0	0.0	0.0	0.0	0.0
OTU 1106	0.0	0.0	0.0	0.0	0.0	0.0	0.0	0.0	0.0	0.0	0.0	0.0	0.0	0.0	0.0	0.0	0.0	0.0	0.0	85.0	0.0	0.0	0.0	0.0	0.0	0.0	0.0	0.0	0.0	0.0	0.0
OTU 1107	0.0	0.0	0.0	0.0	0.0	0.0	0.0	0.0	0.0	0.0	0.0	0.0	0.0	0.0	0.0	0.0	0.0	0.0	0.0	0.0	0.0	85.0	0.0	0.0	0.0	0.0	0.0	0.0	0.0	0.0	0.0
OTU 1108	0.0	0.0	0.0	0.0	0.0	0.0	0.0	0.0	0.0	0.0	0.0	0.0	0.0	0.0	0.0	0.0	0.0	0.0	0.0	0.0	0.0	0.0	0.0	0.0	0.0	0.0	0.0	0.0	85.0	0.0	0.0
OTU 1109	0.0	0.0	0.0	0.0	84.0	0.0	0.0	0.0	0.0	0.0	0.0	0.0	0.0	0.0	0.0	0.0	0.0	0.0	0.0	0.0	0.0	0.0	0.0	0.0	0.0	0.0	0.0	0.0	0.0	0.0	0.0
OTU 1110	0.0	0.0	0.0	0.0	0.0	0.0	84.0	0.0	0.0	0.0	0.0	0.0	0.0	0.0	0.0	0.0	0.0	0.0	0.0	0.0	0.0	0.0	0.0	0.0	0.0	0.0	0.0	0.0	0.0	0.0	0.0
OTU 1111	0.0	0.0	0.0	0.0	0.0	0.0	30.0	0.0	0.0	0.0	40.0	0.0	0.0	0.0	0.0	0.0	0.0	0.0	0.0	0.0	0.0	0.0	0.0	0.0	0.0	0.0	0.0	14.0	0.0	0.0	0.0
OTU 1112	0.0	0.0	0.0	0.0	0.0	0.0	0.0	17.0	21.0	0.0	0.0	0.0	0.0	0.0	0.0	0.0	0.0	0.0	0.0	5.0	23.0	18.0	0.0	0.0	0.0	0.0	0.0	0.0	0.0	0.0	0.0
OTU 1113	0.0	0.0	0.0	0.0	0.0	0.0	0.0	0.0	84.0	0.0	0.0	0.0	0.0	0.0	0.0	0.0	0.0	0.0	0.0	0.0	0.0	0.0	0.0	0.0	0.0	0.0	0.0	0.0	0.0	0.0	0.0
OTU 1114	0.0	0.0	0.0	0.0	0.0	0.0	0.0	0.0	0.0	84.0	0.0	0.0	0.0	0.0	0.0	0.0	0.0	0.0	0.0	0.0	0.0	0.0	0.0	0.0	0.0	0.0	0.0	0.0	0.0	0.0	0.0
OTU 1115	0.0	0.0	0.0	0.0	0.0	0.0	0.0	0.0	0.0	0.0	0.0	26.0	58.0	0.0	0.0	0.0	0.0	0.0	0.0	0.0	0.0	0.0	0.0	0.0	0.0	0.0	0.0	0.0	0.0	0.0	0.0
OTU 1116	0.0	0.0	0.0	0.0	0.0	0.0	0.0	0.0	0.0	0.0	0.0	0.0	0.0	0.0	84.0	0.0	0.0	0.0	0.0	0.0	0.0	0.0	0.0	0.0	0.0	0.0	0.0	0.0	0.0	0.0	0.0
OTU 1117	0.0	0.0	0.0	0.0	0.0	0.0	0.0	0.0	0.0	0.0	0.0	0.0	0.0	0.0	0.0	0.0	0.0	0.0	0.0	0.0	84.0	0.0	0.0	0.0	0.0	0.0	0.0	0.0	0.0	0.0	0.0
OTU 1118	0.0	0.0	0.0	0.0	0.0	0.0	0.0	0.0	0.0	0.0	0.0	0.0	0.0	0.0	0.0	0.0	0.0	0.0	0.0	0.0	0.0	84.0	0.0	0.0	0.0	0.0	0.0	0.0	0.0	0.0	0.0
OTU 1119	0.0	0.0	0.0	0.0	0.0	0.0	0.0	0.0	0.0	0.0	0.0	0.0	0.0	0.0	0.0	0.0	0.0	0.0	0.0	0.0	0.0	63.0	0.0	0.0	0.0	21.0	0.0	0.0	0.0	0.0	0.0
OTU 1120	0.0	0.0	0.0	0.0	0.0	0.0	0.0	0.0	0.0	0.0	0.0	0.0	0.0	0.0	0.0	0.0	0.0	0.0	0.0	0.0	0.0	0.0	0.0	84.0	0.0	0.0	0.0	0.0	0.0	0.0	0.0
OTU 1121	33.0	0.0	0.0	0.0	0.0	0.0	25.0	0.0	0.0	0.0	0.0	0.0	0.0	0.0	0.0	0.0	0.0	0.0	0.0	0.0	0.0	0.0	0.0	0.0	25.0	0.0	0.0	0.0	0.0	0.0	0.0
OTU 1122	0.0	83.0	0.0	0.0	0.0	0.0	0.0	0.0	0.0	0.0	0.0	0.0	0.0	0.0	0.0	0.0	0.0	0.0	0.0	0.0	0.0	0.0	0.0	0.0	0.0	0.0	0.0	0.0	0.0	0.0	0.0
OTU 1123	0.0	0.0	0.0	0.0	0.0	83.0	0.0	0.0	0.0	0.0	0.0	0.0	0.0	0.0	0.0	0.0	0.0	0.0	0.0	0.0	0.0	0.0	0.0	0.0	0.0	0.0	0.0	0.0	0.0	0.0	0.0
OTU 1124	0.0	0.0	0.0	0.0	0.0	0.0	0.0	0.0	0.0	0.0	0.0	83.0	0.0	0.0	0.0	0.0	0.0	0.0	0.0	0.0	0.0	0.0	0.0	0.0	0.0	0.0	0.0	0.0	0.0	0.0	0.0
OTU 1125	0.0	0.0	0.0	0.0	0.0	0.0	0.0	0.0	0.0	0.0	0.0	13.0	0.0	0.0	30.0	0.0	0.0	0.0	13.0	0.0	0.0	0.0	0.0	0.0	0.0	27.0	0.0	0.0	0.0	0.0	0.0
OTU 1126	0.0	0.0	0.0	0.0	0.0	0.0	0.0	0.0	0.0	0.0	0.0	0.0	0.0	0.0	0.0	0.0	0.0	0.0	0.0	0.0	0.0	83.0	0.0	0.0	0.0	0.0	0.0	0.0	0.0	0.0	0.0
OTU 1127	0.0	0.0	0.0	17.0	0.0	0.0	0.0	0.0	17.0	0.0	0.0	0.0	0.0	0.0	0.0	0.0	0.0	0.0	0.0	0.0	0.0	4.0	0.0	44.0	0.0	0.0	0.0	0.0	0.0	0.0	0.0
OTU 1128	0.0	0.0	0.0	0.0	82.0	0.0	0.0	0.0	0.0	0.0	0.0	0.0	0.0	0.0	0.0	0.0	0.0	0.0	0.0	0.0	0.0	0.0	0.0	0.0	0.0	0.0	0.0	0.0	0.0	0.0	0.0
OTU 1129	0.0	0.0	0.0	0.0	0.0	42.0	0.0	0.0	40.0	0.0	0.0	0.0	0.0	0.0	0.0	0.0	0.0	0.0	0.0	0.0	0.0	0.0	0.0	0.0	0.0	0.0	0.0	0.0	0.0	0.0	0.0
OTU 1130	0.0	0.0	0.0	0.0	0.0	0.0	82.0	0.0	0.0	0.0	0.0	0.0	0.0	0.0	0.0	0.0	0.0	0.0	0.0	0.0	0.0	0.0	0.0	0.0	0.0	0.0	0.0	0.0	0.0	0.0	0.0
OTU 1131	0.0	0.0	0.0	0.0	0.0	0.0	28.0	0.0	0.0	0.0	22.0	0.0	0.0	0.0	0.0	0.0	0.0	0.0	0.0	0.0	0.0	0.0	0.0	0.0	0.0	0.0	0.0	32.0	0.0	0.0	0.0
OTU 1132	0.0	0.0	0.0	0.0	0.0	0.0	0.0	82.0	0.0	0.0	0.0	0.0	0.0	0.0	0.0	0.0	0.0	0.0	0.0	0.0	0.0	0.0	0.0	0.0	0.0	0.0	0.0	0.0	0.0	0.0	0.0
OTU 1133	0.0	0.0	0.0	0.0	0.0	0.0	0.0	0.0	11.0	0.0	71.0	0.0	0.0	0.0	0.0	0.0	0.0	0.0	0.0	0.0	0.0	0.0	0.0	0.0	0.0	0.0	0.0	0.0	0.0	0.0	0.0
OTU 1134	0.0	0.0	0.0	0.0	0.0	0.0	0.0	0.0	0.0	0.0	82.0	0.0	0.0	0.0	0.0	0.0	0.0	0.0	0.0	0.0	0.0	0.0	0.0	0.0	0.0	0.0	0.0	0.0	0.0	0.0	0.0
OTU 1135	0.0	0.0	0.0	0.0	0.0	0.0	0.0	0.0	0.0	0.0	0.0	82.0	0.0	0.0	0.0	0.0	0.0	0.0	0.0	0.0	0.0	0.0	0.0	0.0	0.0	0.0	0.0	0.0	0.0	0.0	0.0
OTU 1136	0.0	0.0	0.0	0.0	0.0	0.0	0.0	0.0	0.0	0.0	0.0	82.0	0.0	0.0	0.0	0.0	0.0	0.0	0.0	0.0	0.0	0.0	0.0	0.0	0.0	0.0	0.0	0.0	0.0	0.0	0.0
OTU 1137	0.0	0.0	0.0	0.0	0.0	0.0	0.0	0.0	0.0	0.0	0.0	0.0	0.0	0.0	0.0	0.0	0.0	0.0	0.0	23.0	0.0	0.0	59.0	0.0	0.0	0.0	0.0	0.0	0.0	0.0	0.0
OTU 1138	0.0	0.0	0.0	0.0	81.0	0.0	0.0	0.0	0.0	0.0	0.0	0.0	0.0	0.0	0.0	0.0	0.0	0.0	0.0	0.0	0.0	0.0	0.0	0.0	0.0	0.0	0.0	0.0	0.0	0.0	0.0
OTU 1139	0.0	0.0	0.0	0.0	81.0	0.0	0.0	0.0	0.0	0.0	0.0	0.0	0.0	0.0	0.0	0.0	0.0	0.0	0.0	0.0	0.0	0.0	0.0	0.0	0.0	0.0	0.0	0.0	0.0	0.0	0.0
OTU 1140	0.0	0.0	0.0	0.0	20.0	0.0	0.0	0.0	0.0	0.0	0.0	0.0	0.0	0.0	0.0	0.0	0.0	0.0	0.0	31.0	0.0	0.0	0.0	0.0	8.0	0.0	22.0	0.0	0.0	0.0	0.0
OTU 1141	0.0	0.0	0.0	0.0	16.0	0.0	0.0	0.0	0.0	20.0	0.0	0.0	0.0	0.0	0.0	0.0	0.0	0.0	0.0	0.0	0.0	18.0	27.0	0.0	0.0	0.0	0.0	0.0	0.0	0.0	0.0
OTU 1142	0.0	0.0	0.0	0.0	8.0	14.0	0.0	0.0	0.0	24.0	0.0	0.0	0.0	0.0	0.0	0.0	0.0	0.0	0.0	23.0	0.0	0.0	0.0	0.0	12.0	0.0	0.0	0.0	0.0	0.0	0.0
OTU 1143	0.0	0.0	0.0	0.0	0.0	0.0	0.0	40.0	0.0	0.0	0.0	0.0	0.0	0.0	0.0	0.0	0.0	0.0	0.0	0.0	0.0	41.0	0.0	0.0	0.0	0.0	0.0	0.0	0.0	0.0	0.0
OTU 1144	0.0	0.0	0.0	0.0	0.0	0.0	0.0	0.0	7.0	13.0	0.0	0.0	0.0	0.0	0.0	0.0	0.0	0.0	0.0	0.0	0.0	0.0	0.0	0.0	0.0	26.0	0.0	0.0	35.0	0.0	0.0
OTU 1145	0.0	0.0	0.0	0.0	0.0	0.0	0.0	0.0	0.0	0.0	81.0	0.0	0.0	0.0	0.0	0.0	0.0	0.0	0.0	0.0	0.0	0.0	0.0	0.0	0.0	0.0	0.0	0.0	0.0	0.0	0.0
OTU 1146	0.0	0.0	0.0	0.0	0.0	0.0	0.0	0.0	0.0	0.0	0.0	56.0	0.0	0.0	0.0	0.0	0.0	0.0	0.0	14.0	0.0	0.0	0.0	0.0	0.0	0.0	0.0	0.0	0.0	0.0	11.0
OTU 1147	0.0	0.0	0.0	0.0	0.0	0.0	0.0	0.0	0.0	0.0	0.0	0.0	0.0	81.0	0.0	0.0	0.0	0.0	0.0	0.0	0.0	0.0	0.0	0.0	0.0	0.0	0.0	0.0	0.0	0.0	0.0
OTU 1148	0.0	0.0	0.0	0.0	0.0	0.0	0.0	0.0	0.0	0.0	0.0	0.0	0.0	0.0	0.0	0.0	0.0	0.0	0.0	0.0	25.0	0.0	0.0	0.0	0.0	56.0	0.0	0.0	0.0	0.0	0.0
OTU 1149	0.0	55.0	0.0	0.0	0.0	0.0	0.0	0.0	0.0	0.0	0.0	0.0	0.0	0.0	0.0	0.0	0.0	0.0	0.0	0.0	0.0	0.0	0.0	0.0	0.0	0.0	0.0	25.0	0.0	0.0	0.0
OTU 1150	0.0	0.0	0.0	23.0	0.0	0.0	0.0	0.0	0.0	0.0	0.0	0.0	0.0	0.0	0.0	38.0	0.0	0.0	13.0	0.0	0.0	0.0	0.0	0.0	0.0	0.0	0.0	0.0	0.0	6.0	0.0
OTU 1151	0.0	0.0	0.0	0.0	0.0	0.0	18.0	0.0	0.0	0.0	0.0	0.0	0.0	0.0	0.0	19.0	0.0	0.0	0.0	0.0	31.0	0.0	0.0	0.0	0.0	0.0	0.0	12.0	0.0	0.0	0.0
OTU 1152	0.0	0.0	0.0	0.0	0.0	0.0	0.0	0.0	0.0	0.0	13.0	36.0	0.0	0.0	0.0	0.0	0.0	0.0	0.0	0.0	0.0	0.0	9.0	0.0	0.0	0.0	22.0	0.0	0.0	0.0	0.0
OTU 1153	0.0	0.0	0.0	0.0	0.0	0.0	0.0	0.0	0.0	0.0	0.0	0.0	0.0	0.0	0.0	0.0	0.0	0.0	0.0	0.0	0.0	0.0	0.0	0.0	0.0	80.0	0.0	0.0	0.0	0.0	0.0
OTU 1154	0.0	0.0	0.0	0.0	0.0	0.0	0.0	0.0	0.0	0.0	0.0	0.0	0.0	0.0	0.0	0.0	0.0	0.0	0.0	0.0	0.0	0.0	0.0	0.0	0.0	0.0	0.0	80.0	0.0	0.0	0.0
OTU 1155	0.0	9.0	0.0	0.0	0.0	0.0	0.0	0.0	0.0	0.0	0.0	12.0	0.0	11.0	0.0	12.0	0.0	0.0	0.0	0.0	9.0	0.0	0.0	14.0	12.0	0.0	0.0	0.0	0.0	0.0	0.0
OTU 1156	0.0	0.0	0.0	0.0	0.0	0.0	79.0	0.0	0.0	0.0	0.0	0.0	0.0	0.0	0.0	0.0	0.0	0.0	0.0	0.0	0.0	0.0	0.0	0.0	0.0	0.0	0.0	0.0	0.0	0.0	0.0
OTU 1157	0.0	0.0	0.0	0.0	0.0	0.0	0.0	31.0	9.0	0.0	0.0	0.0	0.0	0.0	0.0	0.0	0.0	0.0	0.0	16.0	0.0	23.0	0.0	0.0	0.0	0.0	0.0	0.0	0.0	0.0	0.0
OTU 1158	0.0	0.0	0.0	0.0	0.0	0.0	0.0	0.0	0.0	0.0	0.0	0.0	19.0	0.0	0.0	0.0	0.0	31.0	0.0	0.0	0.0	0.0	0.0	0.0	29.0	0.0	0.0	0.0	0.0	0.0	0.0
OTU 1159	0.0	0.0	0.0	0.0	0.0	0.0	0.0	0.0	0.0	0.0	0.0	0.0	0.0	55.0	0.0	0.0	0.0	0.0	0.0	0.0	0.0	24.0	0.0	0.0	0.0	0.0	0.0	0.0	0.0	0.0	0.0
OTU 1160	0.0	0.0	0.0	0.0	0.0	0.0	0.0	0.0	0.0	0.0	0.0	0.0	0.0	0.0	79.0	0.0	0.0	0.0	0.0	0.0	0.0	0.0	0.0	0.0	0.0	0.0	0.0	0.0	0.0	0.0	0.0
OTU 1161	0.0	0.0	0.0	0.0	0.0	0.0	0.0	0.0	0.0	0.0	0.0	0.0	0.0	0.0	79.0	0.0	0.0	0.0	0.0	0.0	0.0	0.0	0.0	0.0	0.0	0.0	0.0	0.0	0.0	0.0	0.0
OTU 1162	0.0	0.0	0.0	0.0	0.0	0.0	0.0	0.0	0.0	0.0	0.0	0.0	0.0	0.0	0.0	0.0	0.0	0.0	79.0	0.0	0.0	0.0	0.0	0.0	0.0	0.0	0.0	0.0	0.0	0.0	0.0
OTU 1163	0.0	0.0	0.0	0.0	0.0	0.0	0.0	0.0	0.0	0.0	0.0	0.0	0.0	0.0	0.0	0.0	0.0	0.0	0.0	0.0	0.0	0.0	0.0	79.0	0.0	0.0	0.0	0.0	0.0	0.0	0.0
OTU 1164	0.0	0.0	0.0	0.0	0.0	0.0	0.0	0.0	0.0	0.0	0.0	0.0	0.0	0.0	0.0	0.0	0.0	0.0	0.0	0.0	0.0	0.0	0.0	79.0	0.0	0.0	0.0	0.0	0.0	0.0	0.0
OTU 1165	0.0	0.0	0.0	0.0	0.0	0.0	0.0	0.0	0.0	0.0	0.0	0.0	0.0	0.0	0.0	0.0	0.0	0.0	0.0	0.0	0.0	0.0	0.0	79.0	0.0	0.0	0.0	0.0	0.0	0.0	0.0
OTU 1166	0.0	0.0	0.0	0.0	0.0	0.0	0.0	0.0	0.0	0.0	0.0	0.0	0.0	0.0	0.0	0.0	0.0	0.0	0.0	0.0	0.0	0.0	0.0	0.0	44.0	35.0	0.0	0.0	0.0	0.0	0.0
OTU 1167	78.0	0.0	0.0	0.0	0.0	0.0	0.0	0.0	0.0	0.0	0.0	0.0	0.0	0.0	0.0	0.0	0.0	0.0	0.0	0.0	0.0	0.0	0.0	0.0	0.0	0.0	0.0	0.0	0.0	0.0	0.0
OTU 1168	0.0	21.0	0.0	18.0	0.0	9.0	0.0	0.0	5.0	0.0	0.0	0.0	0.0	0.0	0.0	0.0	0.0	0.0	11.0	0.0	0.0	6.0	0.0	8.0	0.0	0.0	0.0	0.0	0.0	0.0	0.0
OTU 1169	0.0	0.0	0.0	32.0	0.0	0.0	46.0	0.0	0.0	0.0	0.0	0.0	0.0	0.0	0.0	0.0	0.0	0.0	0.0	0.0	0.0	0.0	0.0	0.0	0.0	0.0	0.0	0.0	0.0	0.0	0.0
OTU 1170	0.0	0.0	0.0	0.0	33.0	0.0	0.0	0.0	45.0	0.0	0.0	0.0	0.0	0.0	0.0	0.0	0.0	0.0	0.0	0.0	0.0	0.0	0.0	0.0	0.0	0.0	0.0	0.0	0.0	0.0	0.0
OTU 1171	0.0	0.0	0.0	0.0	23.0	0.0	55.0	0.0	0.0	0.0	0.0	0.0	0.0	0.0	0.0	0.0	0.0	0.0	0.0	0.0	0.0	0.0	0.0	0.0	0.0	0.0	0.0	0.0	0.0	0.0	0.0
OTU 1172	0.0	0.0	0.0	0.0	15.0	0.0	31.0	0.0	0.0	0.0	23.0	0.0	0.0	0.0	0.0	0.0	0.0	0.0	0.0	0.0	9.0	0.0	0.0	0.0	0.0	0.0	0.0	0.0	0.0	0.0	0.0
OTU 1173	0.0	0.0	0.0	0.0	0.0	0.0	0.0	0.0	0.0	78.0	0.0	0.0	0.0	0.0	0.0	0.0	0.0	0.0	0.0	0.0	0.0	0.0	0.0	0.0	0.0	0.0	0.0	0.0	0.0	0.0	0.0
OTU 1174	0.0	0.0	0.0	0.0	0.0	0.0	0.0	0.0	0.0	0.0	0.0	78.0	0.0	0.0	0.0	0.0	0.0	0.0	0.0	0.0	0.0	0.0	0.0	0.0	0.0	0.0	0.0	0.0	0.0	0.0	0.0
OTU 1175	0.0	0.0	0.0	0.0	0.0	0.0	0.0	0.0	0.0	0.0	0.0	78.0	0.0	0.0	0.0	0.0	0.0	0.0	0.0	0.0	0.0	0.0	0.0	0.0	0.0	0.0	0.0	0.0	0.0	0.0	0.0
OTU 1176	0.0	0.0	0.0	0.0	0.0	0.0	0.0	0.0	0.0	0.0	0.0	0.0	0.0	58.0	0.0	0.0	0.0	0.0	0.0	0.0	0.0	0.0	20.0	0.0	0.0	0.0	0.0	0.0	0.0	0.0	0.0
OTU 1177	0.0	0.0	0.0	0.0	0.0	0.0	0.0	0.0	0.0	0.0	0.0	0.0	0.0	0.0	78.0	0.0	0.0	0.0	0.0	0.0	0.0	0.0	0.0	0.0	0.0	0.0	0.0	0.0	0.0	0.0	0.0
OTU 1178	0.0	0.0	0.0	0.0	0.0	0.0	0.0	0.0	0.0	0.0	0.0	0.0	0.0	0.0	28.0	0.0	0.0	0.0	18.0	0.0	0.0	0.0	0.0	0.0	0.0	0.0	0.0	0.0	0.0	32.0	0.0
OTU 1179	0.0	0.0	0.0	0.0	0.0	0.0	0.0	0.0	0.0	0.0	0.0	0.0	0.0	0.0	0.0	0.0	0.0	0.0	0.0	0.0	0.0	0.0	0.0	78.0	0.0	0.0	0.0	0.0	0.0	0.0	0.0
OTU 1180	0.0	0.0	0.0	0.0	0.0	0.0	0.0	0.0	0.0	0.0	0.0	0.0	0.0	0.0	0.0	0.0	0.0	0.0	0.0	0.0	0.0	0.0	0.0	78.0	0.0	0.0	0.0	0.0	0.0	0.0	0.0
OTU 1181	0.0	0.0	0.0	41.0	0.0	0.0	0.0	0.0	0.0	0.0	0.0	0.0	0.0	0.0	0.0	0.0	0.0	0.0	0.0	0.0	0.0	0.0	0.0	0.0	0.0	0.0	0.0	0.0	0.0	36.0	0.0
OTU 1182	0.0	0.0	0.0	0.0	77.0	0.0	0.0	0.0	0.0	0.0	0.0	0.0	0.0	0.0	0.0	0.0	0.0	0.0	0.0	0.0	0.0	0.0	0.0	0.0	0.0	0.0	0.0	0.0	0.0	0.0	0.0
OTU 1183	0.0	0.0	0.0	0.0	0.0	0.0	0.0	0.0	0.0	0.0	0.0	0.0	0.0	0.0	77.0	0.0	0.0	0.0	0.0	0.0	0.0	0.0	0.0	0.0	0.0	0.0	0.0	0.0	0.0	0.0	0.0
OTU 1184	0.0	0.0	0.0	0.0	0.0	0.0	0.0	0.0	0.0	0.0	0.0	0.0	0.0	0.0	0.0	0.0	0.0	0.0	0.0	0.0	0.0	0.0	45.0	0.0	0.0	32.0	0.0	0.0	0.0	0.0	0.0
OTU 1185	0.0	0.0	0.0	0.0	76.0	0.0	0.0	0.0	0.0	0.0	0.0	0.0	0.0	0.0	0.0	0.0	0.0	0.0	0.0	0.0	0.0	0.0	0.0	0.0	0.0	0.0	0.0	0.0	0.0	0.0	0.0
OTU 1186	0.0	0.0	0.0	0.0	0.0	8.0	0.0	0.0	0.0	0.0	0.0	68.0	0.0	0.0	0.0	0.0	0.0	0.0	0.0	0.0	0.0	0.0	0.0	0.0	0.0	0.0	0.0	0.0	0.0	0.0	0.0
OTU 1187	0.0	0.0	0.0	0.0	0.0	0.0	76.0	0.0	0.0	0.0	0.0	0.0	0.0	0.0	0.0	0.0	0.0	0.0	0.0	0.0	0.0	0.0	0.0	0.0	0.0	0.0	0.0	0.0	0.0	0.0	0.0
OTU 1188	0.0	0.0	0.0	0.0	0.0	0.0	0.0	13.0	0.0	0.0	35.0	0.0	0.0	28.0	0.0	0.0	0.0	0.0	0.0	0.0	0.0	0.0	0.0	0.0	0.0	0.0	0.0	0.0	0.0	0.0	0.0
OTU 1189	0.0	0.0	0.0	0.0	0.0	0.0	0.0	0.0	76.0	0.0	0.0	0.0	0.0	0.0	0.0	0.0	0.0	0.0	0.0	0.0	0.0	0.0	0.0	0.0	0.0	0.0	0.0	0.0	0.0	0.0	0.0
OTU 1190	0.0	0.0	0.0	0.0	0.0	0.0	0.0	0.0	0.0	0.0	0.0	0.0	0.0	0.0	0.0	0.0	0.0	0.0	0.0	0.0	0.0	76.0	0.0	0.0	0.0	0.0	0.0	0.0	0.0	0.0	0.0
OTU 1191	0.0	0.0	0.0	0.0	0.0	0.0	0.0	0.0	0.0	0.0	0.0	0.0	0.0	0.0	0.0	0.0	0.0	0.0	0.0	0.0	0.0	76.0	0.0	0.0	0.0	0.0	0.0	0.0	0.0	0.0	0.0
OTU 1192	0.0	0.0	0.0	0.0	0.0	0.0	0.0	0.0	0.0	0.0	0.0	0.0	0.0	0.0	0.0	0.0	0.0	0.0	0.0	0.0	0.0	0.0	0.0	76.0	0.0	0.0	0.0	0.0	0.0	0.0	0.0
OTU 1193	0.0	0.0	0.0	0.0	0.0	0.0	0.0	0.0	0.0	0.0	0.0	0.0	0.0	0.0	0.0	0.0	0.0	0.0	0.0	0.0	0.0	0.0	0.0	0.0	0.0	76.0	0.0	0.0	0.0	0.0	0.0
OTU 1194	0.0	0.0	0.0	0.0	0.0	75.0	0.0	0.0	0.0	0.0	0.0	0.0	0.0	0.0	0.0	0.0	0.0	0.0	0.0	0.0	0.0	0.0	0.0	0.0	0.0	0.0	0.0	0.0	0.0	0.0	0.0
OTU 1195	0.0	0.0	0.0	0.0	0.0	0.0	20.0	0.0	0.0	0.0	55.0	0.0	0.0	0.0	0.0	0.0	0.0	0.0	0.0	0.0	0.0	0.0	0.0	0.0	0.0	0.0	0.0	0.0	0.0	0.0	0.0
OTU 1196	0.0	0.0	0.0	0.0	0.0	0.0	0.0	0.0	0.0	0.0	0.0	75.0	0.0	0.0	0.0	0.0	0.0	0.0	0.0	0.0	0.0	0.0	0.0	0.0	0.0	0.0	0.0	0.0	0.0	0.0	0.0
OTU 1197	0.0	0.0	0.0	0.0	0.0	0.0	0.0	0.0	0.0	0.0	0.0	0.0	0.0	0.0	0.0	0.0	0.0	0.0	0.0	34.0	41.0	0.0	0.0	0.0	0.0	0.0	0.0	0.0	0.0	0.0	0.0
OTU 1198	0.0	0.0	0.0	0.0	0.0	0.0	0.0	0.0	0.0	0.0	0.0	0.0	0.0	0.0	0.0	0.0	0.0	0.0	0.0	23.0	0.0	0.0	0.0	0.0	0.0	0.0	0.0	0.0	0.0	52.0	0.0
OTU 1199	0.0	0.0	0.0	0.0	0.0	0.0	0.0	0.0	0.0	0.0	0.0	0.0	0.0	0.0	0.0	0.0	0.0	0.0	0.0	0.0	0.0	0.0	0.0	0.0	0.0	0.0	0.0	0.0	75.0	0.0	0.0
OTU 1200	0.0	0.0	0.0	0.0	0.0	0.0	0.0	0.0	0.0	0.0	0.0	0.0	0.0	0.0	0.0	0.0	0.0	0.0	0.0	0.0	0.0	0.0	0.0	0.0	0.0	0.0	0.0	0.0	0.0	75.0	0.0
OTU 1201	0.0	0.0	20.0	0.0	0.0	0.0	0.0	0.0	0.0	0.0	0.0	46.0	0.0	0.0	0.0	0.0	0.0	0.0	0.0	0.0	0.0	0.0	8.0	0.0	0.0	0.0	0.0	0.0	0.0	0.0	0.0
OTU 1202	0.0	0.0	0.0	32.0	0.0	0.0	0.0	0.0	0.0	0.0	0.0	0.0	0.0	0.0	0.0	0.0	0.0	0.0	0.0	0.0	0.0	0.0	0.0	0.0	42.0	0.0	0.0	0.0	0.0	0.0	0.0
OTU 1203	0.0	0.0	0.0	0.0	59.0	0.0	0.0	0.0	0.0	0.0	0.0	0.0	0.0	0.0	0.0	0.0	0.0	0.0	0.0	15.0	0.0	0.0	0.0	0.0	0.0	0.0	0.0	0.0	0.0	0.0	0.0
OTU 1204	0.0	0.0	0.0	0.0	19.0	7.0	14.0	0.0	0.0	0.0	14.0	0.0	0.0	0.0	0.0	0.0	0.0	0.0	0.0	0.0	20.0	0.0	0.0	0.0	0.0	0.0	0.0	0.0	0.0	0.0	0.0
OTU 1205	0.0	0.0	0.0	0.0	0.0	0.0	0.0	0.0	0.0	0.0	0.0	74.0	0.0	0.0	0.0	0.0	0.0	0.0	0.0	0.0	0.0	0.0	0.0	0.0	0.0	0.0	0.0	0.0	0.0	0.0	0.0
OTU 1206	0.0	0.0	0.0	0.0	0.0	0.0	0.0	0.0	0.0	0.0	0.0	0.0	74.0	0.0	0.0	0.0	0.0	0.0	0.0	0.0	0.0	0.0	0.0	0.0	0.0	0.0	0.0	0.0	0.0	0.0	0.0
OTU 1207	0.0	0.0	0.0	0.0	0.0	0.0	0.0	0.0	0.0	0.0	0.0	0.0	0.0	74.0	0.0	0.0	0.0	0.0	0.0	0.0	0.0	0.0	0.0	0.0	0.0	0.0	0.0	0.0	0.0	0.0	0.0
OTU 1208	0.0	0.0	0.0	0.0	0.0	0.0	0.0	0.0	0.0	0.0	0.0	0.0	0.0	36.0	0.0	0.0	0.0	0.0	0.0	0.0	0.0	0.0	0.0	0.0	0.0	0.0	0.0	0.0	0.0	38.0	0.0
OTU 1209	0.0	0.0	0.0	73.0	0.0	0.0	0.0	0.0	0.0	0.0	0.0	0.0	0.0	0.0	0.0	0.0	0.0	0.0	0.0	0.0	0.0	0.0	0.0	0.0	0.0	0.0	0.0	0.0	0.0	0.0	0.0
OTU 1210	0.0	0.0	0.0	0.0	19.0	0.0	0.0	0.0	0.0	0.0	0.0	0.0	0.0	0.0	0.0	0.0	0.0	0.0	28.0	0.0	0.0	0.0	0.0	0.0	0.0	0.0	0.0	0.0	0.0	26.0	0.0
OTU 1211	0.0	0.0	0.0	0.0	0.0	0.0	0.0	0.0	0.0	0.0	73.0	0.0	0.0	0.0	0.0	0.0	0.0	0.0	0.0	0.0	0.0	0.0	0.0	0.0	0.0	0.0	0.0	0.0	0.0	0.0	0.0
OTU 1212	0.0	0.0	0.0	0.0	0.0	0.0	0.0	0.0	0.0	0.0	0.0	73.0	0.0	0.0	0.0	0.0	0.0	0.0	0.0	0.0	0.0	0.0	0.0	0.0	0.0	0.0	0.0	0.0	0.0	0.0	0.0
OTU 1213	0.0	0.0	0.0	0.0	0.0	0.0	0.0	0.0	0.0	0.0	0.0	0.0	73.0	0.0	0.0	0.0	0.0	0.0	0.0	0.0	0.0	0.0	0.0	0.0	0.0	0.0	0.0	0.0	0.0	0.0	0.0
OTU 1214	0.0	0.0	0.0	0.0	0.0	0.0	0.0	0.0	0.0	0.0	0.0	0.0	0.0	0.0	73.0	0.0	0.0	0.0	0.0	0.0	0.0	0.0	0.0	0.0	0.0	0.0	0.0	0.0	0.0	0.0	0.0
OTU 1215	0.0	0.0	0.0	0.0	0.0	0.0	0.0	0.0	0.0	0.0	0.0	0.0	0.0	0.0	0.0	0.0	0.0	0.0	0.0	0.0	73.0	0.0	0.0	0.0	0.0	0.0	0.0	0.0	0.0	0.0	0.0
OTU 1216	0.0	0.0	0.0	0.0	0.0	0.0	0.0	0.0	0.0	0.0	0.0	0.0	0.0	0.0	0.0	0.0	0.0	0.0	0.0	0.0	0.0	73.0	0.0	0.0	0.0	0.0	0.0	0.0	0.0	0.0	0.0
OTU 1217	0.0	0.0	0.0	0.0	0.0	0.0	0.0	0.0	0.0	0.0	0.0	0.0	0.0	0.0	0.0	0.0	0.0	0.0	0.0	0.0	0.0	0.0	0.0	0.0	73.0	0.0	0.0	0.0	0.0	0.0	0.0
OTU 1218	0.0	0.0	0.0	0.0	0.0	0.0	0.0	0.0	0.0	0.0	0.0	0.0	0.0	0.0	0.0	0.0	0.0	0.0	0.0	0.0	0.0	0.0	0.0	0.0	0.0	0.0	42.0	31.0	0.0	0.0	0.0
OTU 1219	39.0	16.0	0.0	0.0	0.0	0.0	0.0	0.0	0.0	0.0	0.0	0.0	0.0	0.0	0.0	0.0	0.0	0.0	0.0	0.0	0.0	0.0	0.0	0.0	0.0	0.0	0.0	17.0	0.0	0.0	0.0
OTU 1220	35.0	22.0	0.0	0.0	0.0	0.0	0.0	0.0	0.0	0.0	0.0	0.0	0.0	0.0	0.0	0.0	0.0	0.0	0.0	0.0	0.0	0.0	0.0	0.0	0.0	0.0	0.0	0.0	15.0	0.0	0.0
OTU 1221	0.0	0.0	0.0	0.0	34.0	0.0	0.0	0.0	0.0	0.0	0.0	38.0	0.0	0.0	0.0	0.0	0.0	0.0	0.0	0.0	0.0	0.0	0.0	0.0	0.0	0.0	0.0	0.0	0.0	0.0	0.0
OTU 1222	0.0	0.0	0.0	0.0	0.0	66.0	0.0	0.0	0.0	0.0	0.0	0.0	0.0	0.0	0.0	0.0	0.0	0.0	0.0	0.0	0.0	0.0	0.0	0.0	0.0	0.0	0.0	0.0	0.0	0.0	6.0
OTU 1223	0.0	0.0	0.0	0.0	0.0	0.0	0.0	0.0	15.0	0.0	0.0	0.0	0.0	0.0	57.0	0.0	0.0	0.0	0.0	0.0	0.0	0.0	0.0	0.0	0.0	0.0	0.0	0.0	0.0	0.0	0.0
OTU 1224	0.0	0.0	0.0	0.0	0.0	0.0	0.0	0.0	0.0	0.0	0.0	72.0	0.0	0.0	0.0	0.0	0.0	0.0	0.0	0.0	0.0	0.0	0.0	0.0	0.0	0.0	0.0	0.0	0.0	0.0	0.0
OTU 1225	0.0	0.0	0.0	0.0	0.0	0.0	0.0	0.0	0.0	0.0	0.0	0.0	0.0	0.0	0.0	72.0	0.0	0.0	0.0	0.0	0.0	0.0	0.0	0.0	0.0	0.0	0.0	0.0	0.0	0.0	0.0
OTU 1226	0.0	0.0	0.0	0.0	0.0	0.0	0.0	0.0	0.0	0.0	0.0	0.0	0.0	0.0	0.0	72.0	0.0	0.0	0.0	0.0	0.0	0.0	0.0	0.0	0.0	0.0	0.0	0.0	0.0	0.0	0.0
OTU 1227	0.0	0.0	0.0	0.0	0.0	0.0	0.0	0.0	0.0	0.0	0.0	0.0	0.0	0.0	0.0	0.0	0.0	0.0	0.0	20.0	0.0	52.0	0.0	0.0	0.0	0.0	0.0	0.0	0.0	0.0	0.0
OTU 1228	0.0	0.0	0.0	0.0	0.0	0.0	0.0	0.0	0.0	0.0	0.0	0.0	0.0	0.0	0.0	0.0	0.0	0.0	0.0	0.0	0.0	0.0	0.0	72.0	0.0	0.0	0.0	0.0	0.0	0.0	0.0
OTU 1229	0.0	0.0	0.0	0.0	0.0	0.0	0.0	0.0	0.0	0.0	0.0	0.0	0.0	0.0	0.0	0.0	0.0	0.0	0.0	0.0	0.0	0.0	0.0	0.0	0.0	72.0	0.0	0.0	0.0	0.0	0.0
OTU 1230	0.0	0.0	0.0	0.0	0.0	0.0	0.0	0.0	0.0	0.0	0.0	0.0	0.0	0.0	0.0	0.0	0.0	0.0	0.0	0.0	0.0	0.0	0.0	0.0	0.0	0.0	0.0	0.0	0.0	72.0	0.0
OTU 1231	0.0	0.0	0.0	71.0	0.0	0.0	0.0	0.0	0.0	0.0	0.0	0.0	0.0	0.0	0.0	0.0	0.0	0.0	0.0	0.0	0.0	0.0	0.0	0.0	0.0	0.0	0.0	0.0	0.0	0.0	0.0
OTU 1232	0.0	0.0	0.0	0.0	31.0	0.0	0.0	0.0	0.0	0.0	0.0	40.0	0.0	0.0	0.0	0.0	0.0	0.0	0.0	0.0	0.0	0.0	0.0	0.0	0.0	0.0	0.0	0.0	0.0	0.0	0.0
OTU 1233	0.0	0.0	0.0	0.0	0.0	71.0	0.0	0.0	0.0	0.0	0.0	0.0	0.0	0.0	0.0	0.0	0.0	0.0	0.0	0.0	0.0	0.0	0.0	0.0	0.0	0.0	0.0	0.0	0.0	0.0	0.0
OTU 1234	0.0	0.0	0.0	0.0	0.0	0.0	71.0	0.0	0.0	0.0	0.0	0.0	0.0	0.0	0.0	0.0	0.0	0.0	0.0	0.0	0.0	0.0	0.0	0.0	0.0	0.0	0.0	0.0	0.0	0.0	0.0
OTU 1235	0.0	0.0	0.0	0.0	0.0	0.0	0.0	0.0	0.0	0.0	0.0	56.0	0.0	0.0	0.0	0.0	0.0	0.0	0.0	0.0	0.0	0.0	0.0	0.0	0.0	15.0	0.0	0.0	0.0	0.0	0.0
OTU 1236	0.0	0.0	0.0	0.0	0.0	0.0	0.0	0.0	0.0	0.0	0.0	20.0	0.0	0.0	0.0	0.0	0.0	0.0	0.0	0.0	0.0	0.0	0.0	0.0	0.0	0.0	19.0	0.0	0.0	32.0	0.0
OTU 1237	0.0	0.0	0.0	0.0	0.0	0.0	0.0	0.0	0.0	0.0	0.0	0.0	71.0	0.0	0.0	0.0	0.0	0.0	0.0	0.0	0.0	0.0	0.0	0.0	0.0	0.0	0.0	0.0	0.0	0.0	0.0
OTU 1238	0.0	0.0	0.0	0.0	0.0	0.0	0.0	0.0	0.0	0.0	0.0	0.0	71.0	0.0	0.0	0.0	0.0	0.0	0.0	0.0	0.0	0.0	0.0	0.0	0.0	0.0	0.0	0.0	0.0	0.0	0.0
OTU 1239	0.0	0.0	0.0	0.0	0.0	0.0	0.0	0.0	0.0	0.0	0.0	0.0	0.0	0.0	71.0	0.0	0.0	0.0	0.0	0.0	0.0	0.0	0.0	0.0	0.0	0.0	0.0	0.0	0.0	0.0	0.0
OTU 1240	0.0	0.0	0.0	0.0	0.0	0.0	0.0	0.0	0.0	0.0	0.0	0.0	0.0	0.0	0.0	71.0	0.0	0.0	0.0	0.0	0.0	0.0	0.0	0.0	0.0	0.0	0.0	0.0	0.0	0.0	0.0
OTU 1241	0.0	0.0	0.0	0.0	0.0	0.0	0.0	0.0	0.0	0.0	0.0	0.0	0.0	0.0	0.0	0.0	0.0	0.0	0.0	0.0	0.0	0.0	71.0	0.0	0.0	0.0	0.0	0.0	0.0	0.0	0.0
OTU 1242	0.0	0.0	0.0	0.0	0.0	0.0	0.0	0.0	0.0	0.0	0.0	0.0	0.0	0.0	0.0	0.0	0.0	0.0	0.0	0.0	0.0	0.0	0.0	0.0	71.0	0.0	0.0	0.0	0.0	0.0	0.0
OTU 1243	0.0	0.0	0.0	0.0	0.0	0.0	0.0	0.0	0.0	0.0	0.0	0.0	0.0	0.0	0.0	0.0	0.0	0.0	0.0	0.0	0.0	0.0	0.0	0.0	0.0	0.0	0.0	0.0	71.0	0.0	0.0
OTU 1244	0.0	0.0	0.0	0.0	0.0	0.0	31.0	0.0	0.0	0.0	0.0	0.0	0.0	0.0	0.0	0.0	0.0	0.0	0.0	0.0	0.0	0.0	0.0	0.0	0.0	0.0	0.0	0.0	0.0	0.0	39.0
OTU 1245	0.0	0.0	0.0	0.0	0.0	0.0	15.0	0.0	0.0	0.0	23.0	0.0	32.0	0.0	0.0	0.0	0.0	0.0	0.0	0.0	0.0	0.0	0.0	0.0	0.0	0.0	0.0	0.0	0.0	0.0	0.0
OTU 1246	0.0	0.0	0.0	0.0	0.0	0.0	0.0	28.0	0.0	0.0	0.0	0.0	0.0	14.0	0.0	0.0	0.0	0.0	0.0	0.0	0.0	0.0	0.0	0.0	0.0	0.0	0.0	28.0	0.0	0.0	0.0
OTU 1247	0.0	0.0	0.0	0.0	0.0	0.0	0.0	0.0	0.0	0.0	0.0	70.0	0.0	0.0	0.0	0.0	0.0	0.0	0.0	0.0	0.0	0.0	0.0	0.0	0.0	0.0	0.0	0.0	0.0	0.0	0.0
OTU 1248	0.0	0.0	0.0	0.0	0.0	0.0	0.0	0.0	0.0	0.0	0.0	0.0	0.0	0.0	0.0	0.0	0.0	0.0	70.0	0.0	0.0	0.0	0.0	0.0	0.0	0.0	0.0	0.0	0.0	0.0	0.0
OTU 1249	0.0	0.0	0.0	0.0	0.0	0.0	0.0	0.0	0.0	0.0	0.0	0.0	0.0	0.0	0.0	0.0	0.0	0.0	0.0	0.0	70.0	0.0	0.0	0.0	0.0	0.0	0.0	0.0	0.0	0.0	0.0
OTU 1250	0.0	0.0	0.0	0.0	0.0	0.0	0.0	0.0	0.0	0.0	0.0	0.0	0.0	0.0	0.0	0.0	0.0	0.0	0.0	0.0	0.0	70.0	0.0	0.0	0.0	0.0	0.0	0.0	0.0	0.0	0.0
OTU 1251	0.0	0.0	0.0	0.0	0.0	0.0	0.0	0.0	0.0	0.0	0.0	0.0	0.0	0.0	0.0	0.0	0.0	0.0	0.0	0.0	0.0	0.0	0.0	0.0	0.0	70.0	0.0	0.0	0.0	0.0	0.0
OTU 1252	0.0	0.0	0.0	0.0	0.0	0.0	0.0	0.0	0.0	0.0	0.0	0.0	0.0	0.0	0.0	0.0	0.0	0.0	0.0	0.0	0.0	0.0	0.0	0.0	0.0	0.0	0.0	0.0	0.0	0.0	70.0
OTU 1253	69.0	0.0	0.0	0.0	0.0	0.0	0.0	0.0	0.0	0.0	0.0	0.0	0.0	0.0	0.0	0.0	0.0	0.0	0.0	0.0	0.0	0.0	0.0	0.0	0.0	0.0	0.0	0.0	0.0	0.0	0.0
OTU 1254	0.0	0.0	0.0	22.0	0.0	0.0	0.0	0.0	0.0	0.0	0.0	0.0	0.0	0.0	0.0	25.0	0.0	0.0	0.0	0.0	0.0	0.0	22.0	0.0	0.0	0.0	0.0	0.0	0.0	0.0	0.0
OTU 1255	0.0	0.0	0.0	0.0	69.0	0.0	0.0	0.0	0.0	0.0	0.0	0.0	0.0	0.0	0.0	0.0	0.0	0.0	0.0	0.0	0.0	0.0	0.0	0.0	0.0	0.0	0.0	0.0	0.0	0.0	0.0
OTU 1256	0.0	0.0	0.0	0.0	69.0	0.0	0.0	0.0	0.0	0.0	0.0	0.0	0.0	0.0	0.0	0.0	0.0	0.0	0.0	0.0	0.0	0.0	0.0	0.0	0.0	0.0	0.0	0.0	0.0	0.0	0.0
OTU 1257	0.0	0.0	0.0	0.0	0.0	0.0	44.0	0.0	0.0	0.0	25.0	0.0	0.0	0.0	0.0	0.0	0.0	0.0	0.0	0.0	0.0	0.0	0.0	0.0	0.0	0.0	0.0	0.0	0.0	0.0	0.0
OTU 1258	0.0	0.0	0.0	0.0	0.0	0.0	10.0	0.0	0.0	0.0	0.0	0.0	0.0	0.0	0.0	0.0	0.0	0.0	0.0	0.0	0.0	0.0	0.0	0.0	0.0	30.0	15.0	14.0	0.0	0.0	0.0
OTU 1259	0.0	0.0	0.0	0.0	0.0	0.0	0.0	0.0	69.0	0.0	0.0	0.0	0.0	0.0	0.0	0.0	0.0	0.0	0.0	0.0	0.0	0.0	0.0	0.0	0.0	0.0	0.0	0.0	0.0	0.0	0.0
OTU 1260	0.0	0.0	0.0	0.0	0.0	0.0	0.0	0.0	0.0	69.0	0.0	0.0	0.0	0.0	0.0	0.0	0.0	0.0	0.0	0.0	0.0	0.0	0.0	0.0	0.0	0.0	0.0	0.0	0.0	0.0	0.0
OTU 1261	0.0	0.0	0.0	0.0	0.0	0.0	0.0	0.0	0.0	0.0	69.0	0.0	0.0	0.0	0.0	0.0	0.0	0.0	0.0	0.0	0.0	0.0	0.0	0.0	0.0	0.0	0.0	0.0	0.0	0.0	0.0
OTU 1262	0.0	0.0	0.0	0.0	0.0	0.0	0.0	0.0	0.0	0.0	0.0	61.0	8.0	0.0	0.0	0.0	0.0	0.0	0.0	0.0	0.0	0.0	0.0	0.0	0.0	0.0	0.0	0.0	0.0	0.0	0.0
OTU 1263	0.0	0.0	0.0	0.0	0.0	0.0	0.0	0.0	0.0	0.0	0.0	53.0	0.0	0.0	0.0	0.0	0.0	0.0	0.0	0.0	0.0	0.0	0.0	0.0	0.0	0.0	0.0	0.0	0.0	16.0	0.0
OTU 1264	0.0	0.0	0.0	0.0	0.0	0.0	0.0	0.0	0.0	0.0	0.0	0.0	0.0	0.0	0.0	0.0	0.0	0.0	69.0	0.0	0.0	0.0	0.0	0.0	0.0	0.0	0.0	0.0	0.0	0.0	0.0
OTU 1265	0.0	0.0	0.0	0.0	68.0	0.0	0.0	0.0	0.0	0.0	0.0	0.0	0.0	0.0	0.0	0.0	0.0	0.0	0.0	0.0	0.0	0.0	0.0	0.0	0.0	0.0	0.0	0.0	0.0	0.0	0.0
OTU 1266	0.0	0.0	0.0	0.0	7.0	0.0	0.0	0.0	0.0	0.0	0.0	44.0	0.0	0.0	0.0	0.0	0.0	0.0	0.0	0.0	0.0	17.0	0.0	0.0	0.0	0.0	0.0	0.0	0.0	0.0	0.0
OTU 1267	0.0	0.0	0.0	0.0	0.0	0.0	68.0	0.0	0.0	0.0	0.0	0.0	0.0	0.0	0.0	0.0	0.0	0.0	0.0	0.0	0.0	0.0	0.0	0.0	0.0	0.0	0.0	0.0	0.0	0.0	0.0
OTU 1268	0.0	0.0	0.0	0.0	0.0	0.0	68.0	0.0	0.0	0.0	0.0	0.0	0.0	0.0	0.0	0.0	0.0	0.0	0.0	0.0	0.0	0.0	0.0	0.0	0.0	0.0	0.0	0.0	0.0	0.0	0.0
OTU 1269	0.0	0.0	0.0	0.0	0.0	0.0	24.0	0.0	0.0	0.0	44.0	0.0	0.0	0.0	0.0	0.0	0.0	0.0	0.0	0.0	0.0	0.0	0.0	0.0	0.0	0.0	0.0	0.0	0.0	0.0	0.0
OTU 1270	0.0	0.0	0.0	0.0	0.0	0.0	0.0	68.0	0.0	0.0	0.0	0.0	0.0	0.0	0.0	0.0	0.0	0.0	0.0	0.0	0.0	0.0	0.0	0.0	0.0	0.0	0.0	0.0	0.0	0.0	0.0
OTU 1271	0.0	0.0	0.0	0.0	0.0	0.0	0.0	20.0	0.0	0.0	0.0	26.0	0.0	0.0	0.0	0.0	0.0	0.0	0.0	0.0	0.0	0.0	0.0	0.0	0.0	0.0	0.0	0.0	0.0	22.0	0.0
OTU 1272	0.0	0.0	0.0	0.0	0.0	0.0	0.0	0.0	0.0	0.0	68.0	0.0	0.0	0.0	0.0	0.0	0.0	0.0	0.0	0.0	0.0	0.0	0.0	0.0	0.0	0.0	0.0	0.0	0.0	0.0	0.0
OTU 1273	0.0	0.0	0.0	0.0	0.0	0.0	0.0	0.0	0.0	0.0	0.0	0.0	0.0	0.0	0.0	44.0	0.0	0.0	0.0	0.0	0.0	24.0	0.0	0.0	0.0	0.0	0.0	0.0	0.0	0.0	0.0
OTU 1274	0.0	0.0	0.0	0.0	0.0	0.0	0.0	0.0	0.0	0.0	0.0	0.0	0.0	0.0	0.0	0.0	0.0	0.0	68.0	0.0	0.0	0.0	0.0	0.0	0.0	0.0	0.0	0.0	0.0	0.0	0.0
OTU 1275	0.0	0.0	0.0	0.0	0.0	0.0	0.0	0.0	0.0	0.0	0.0	0.0	0.0	0.0	0.0	0.0	0.0	0.0	0.0	0.0	0.0	0.0	0.0	0.0	0.0	0.0	0.0	68.0	0.0	0.0	0.0
OTU 1276	0.0	0.0	0.0	0.0	0.0	0.0	0.0	0.0	0.0	0.0	0.0	0.0	0.0	0.0	0.0	0.0	0.0	0.0	0.0	0.0	0.0	0.0	0.0	0.0	0.0	0.0	0.0	68.0	0.0	0.0	0.0
OTU 1277	0.0	5.0	0.0	0.0	0.0	0.0	0.0	0.0	0.0	6.0	0.0	0.0	0.0	0.0	0.0	0.0	0.0	34.0	0.0	0.0	22.0	0.0	0.0	0.0	0.0	0.0	0.0	0.0	0.0	0.0	0.0
OTU 1278	0.0	0.0	24.0	0.0	22.0	0.0	0.0	0.0	0.0	0.0	0.0	21.0	0.0	0.0	0.0	0.0	0.0	0.0	0.0	0.0	0.0	0.0	0.0	0.0	0.0	0.0	0.0	0.0	0.0	0.0	0.0
OTU 1279	0.0	0.0	0.0	0.0	0.0	0.0	0.0	67.0	0.0	0.0	0.0	0.0	0.0	0.0	0.0	0.0	0.0	0.0	0.0	0.0	0.0	0.0	0.0	0.0	0.0	0.0	0.0	0.0	0.0	0.0	0.0
OTU 1280	0.0	0.0	0.0	0.0	0.0	0.0	0.0	0.0	0.0	0.0	0.0	0.0	0.0	0.0	67.0	0.0	0.0	0.0	0.0	0.0	0.0	0.0	0.0	0.0	0.0	0.0	0.0	0.0	0.0	0.0	0.0
OTU 1281	0.0	0.0	0.0	0.0	0.0	0.0	0.0	0.0	0.0	0.0	0.0	0.0	0.0	0.0	0.0	0.0	33.0	34.0	0.0	0.0	0.0	0.0	0.0	0.0	0.0	0.0	0.0	0.0	0.0	0.0	0.0
OTU 1282	0.0	0.0	0.0	0.0	0.0	0.0	0.0	0.0	0.0	0.0	0.0	0.0	0.0	0.0	0.0	0.0	0.0	0.0	67.0	0.0	0.0	0.0	0.0	0.0	0.0	0.0	0.0	0.0	0.0	0.0	0.0
OTU 1283	0.0	0.0	0.0	0.0	0.0	0.0	0.0	0.0	0.0	0.0	0.0	0.0	0.0	0.0	0.0	0.0	0.0	0.0	0.0	0.0	67.0	0.0	0.0	0.0	0.0	0.0	0.0	0.0	0.0	0.0	0.0
OTU 1284	0.0	0.0	0.0	0.0	0.0	0.0	0.0	0.0	0.0	0.0	0.0	0.0	0.0	0.0	0.0	0.0	0.0	0.0	0.0	0.0	0.0	0.0	67.0	0.0	0.0	0.0	0.0	0.0	0.0	0.0	0.0
OTU 1285	0.0	0.0	0.0	0.0	0.0	0.0	0.0	0.0	0.0	0.0	0.0	0.0	0.0	0.0	0.0	0.0	0.0	0.0	0.0	0.0	0.0	0.0	0.0	0.0	67.0	0.0	0.0	0.0	0.0	0.0	0.0
OTU 1286	24.0	0.0	0.0	0.0	10.0	0.0	0.0	0.0	4.0	0.0	0.0	0.0	0.0	0.0	0.0	0.0	0.0	0.0	0.0	0.0	0.0	0.0	0.0	0.0	0.0	0.0	0.0	0.0	0.0	6.0	22.0
OTU 1287	0.0	0.0	66.0	0.0	0.0	0.0	0.0	0.0	0.0	0.0	0.0	0.0	0.0	0.0	0.0	0.0	0.0	0.0	0.0	0.0	0.0	0.0	0.0	0.0	0.0	0.0	0.0	0.0	0.0	0.0	0.0
OTU 1288	0.0	0.0	0.0	0.0	0.0	0.0	0.0	66.0	0.0	0.0	0.0	0.0	0.0	0.0	0.0	0.0	0.0	0.0	0.0	0.0	0.0	0.0	0.0	0.0	0.0	0.0	0.0	0.0	0.0	0.0	0.0
OTU 1289	0.0	0.0	0.0	0.0	0.0	0.0	0.0	0.0	66.0	0.0	0.0	0.0	0.0	0.0	0.0	0.0	0.0	0.0	0.0	0.0	0.0	0.0	0.0	0.0	0.0	0.0	0.0	0.0	0.0	0.0	0.0
OTU 1290	0.0	0.0	0.0	0.0	0.0	0.0	0.0	0.0	0.0	27.0	0.0	0.0	0.0	0.0	0.0	0.0	0.0	0.0	0.0	0.0	0.0	0.0	0.0	0.0	39.0	0.0	0.0	0.0	0.0	0.0	0.0
OTU 1291	0.0	0.0	0.0	0.0	0.0	0.0	0.0	0.0	0.0	0.0	66.0	0.0	0.0	0.0	0.0	0.0	0.0	0.0	0.0	0.0	0.0	0.0	0.0	0.0	0.0	0.0	0.0	0.0	0.0	0.0	0.0
OTU 1292	0.0	0.0	0.0	0.0	0.0	0.0	0.0	0.0	0.0	0.0	0.0	66.0	0.0	0.0	0.0	0.0	0.0	0.0	0.0	0.0	0.0	0.0	0.0	0.0	0.0	0.0	0.0	0.0	0.0	0.0	0.0
OTU 1293	0.0	0.0	0.0	0.0	0.0	0.0	0.0	0.0	0.0	0.0	0.0	0.0	0.0	66.0	0.0	0.0	0.0	0.0	0.0	0.0	0.0	0.0	0.0	0.0	0.0	0.0	0.0	0.0	0.0	0.0	0.0
OTU 1294	0.0	0.0	0.0	0.0	0.0	0.0	0.0	0.0	0.0	0.0	0.0	0.0	0.0	0.0	0.0	66.0	0.0	0.0	0.0	0.0	0.0	0.0	0.0	0.0	0.0	0.0	0.0	0.0	0.0	0.0	0.0
OTU 1295	0.0	0.0	0.0	0.0	0.0	0.0	0.0	0.0	0.0	0.0	0.0	0.0	0.0	0.0	0.0	66.0	0.0	0.0	0.0	0.0	0.0	0.0	0.0	0.0	0.0	0.0	0.0	0.0	0.0	0.0	0.0
OTU 1296	0.0	0.0	0.0	0.0	0.0	0.0	0.0	0.0	0.0	0.0	0.0	0.0	0.0	0.0	0.0	0.0	0.0	0.0	0.0	0.0	0.0	0.0	0.0	0.0	66.0	0.0	0.0	0.0	0.0	0.0	0.0
OTU 1297	0.0	0.0	0.0	0.0	0.0	0.0	0.0	0.0	0.0	0.0	0.0	0.0	0.0	0.0	0.0	0.0	0.0	0.0	0.0	0.0	0.0	0.0	0.0	0.0	0.0	66.0	0.0	0.0	0.0	0.0	0.0
OTU 1298	0.0	0.0	0.0	0.0	65.0	0.0	0.0	0.0	0.0	0.0	0.0	0.0	0.0	0.0	0.0	0.0	0.0	0.0	0.0	0.0	0.0	0.0	0.0	0.0	0.0	0.0	0.0	0.0	0.0	0.0	0.0
OTU 1299	0.0	0.0	0.0	0.0	26.0	0.0	0.0	19.0	0.0	0.0	0.0	0.0	0.0	0.0	0.0	0.0	0.0	0.0	0.0	0.0	0.0	14.0	0.0	0.0	0.0	0.0	0.0	0.0	0.0	0.0	6.0
OTU 1300	0.0	0.0	0.0	0.0	0.0	0.0	0.0	0.0	34.0	0.0	0.0	0.0	0.0	0.0	0.0	0.0	0.0	0.0	0.0	0.0	0.0	31.0	0.0	0.0	0.0	0.0	0.0	0.0	0.0	0.0	0.0
OTU 1301	0.0	0.0	0.0	0.0	0.0	0.0	0.0	0.0	0.0	65.0	0.0	0.0	0.0	0.0	0.0	0.0	0.0	0.0	0.0	0.0	0.0	0.0	0.0	0.0	0.0	0.0	0.0	0.0	0.0	0.0	0.0
OTU 1302	0.0	0.0	0.0	0.0	0.0	0.0	0.0	0.0	0.0	0.0	0.0	65.0	0.0	0.0	0.0	0.0	0.0	0.0	0.0	0.0	0.0	0.0	0.0	0.0	0.0	0.0	0.0	0.0	0.0	0.0	0.0
OTU 1303	0.0	0.0	0.0	0.0	0.0	0.0	0.0	0.0	0.0	0.0	0.0	0.0	65.0	0.0	0.0	0.0	0.0	0.0	0.0	0.0	0.0	0.0	0.0	0.0	0.0	0.0	0.0	0.0	0.0	0.0	0.0
OTU 1304	0.0	0.0	0.0	0.0	0.0	0.0	0.0	0.0	0.0	0.0	0.0	0.0	65.0	0.0	0.0	0.0	0.0	0.0	0.0	0.0	0.0	0.0	0.0	0.0	0.0	0.0	0.0	0.0	0.0	0.0	0.0
OTU 1305	0.0	0.0	0.0	0.0	0.0	0.0	0.0	0.0	0.0	0.0	0.0	0.0	0.0	0.0	0.0	0.0	0.0	0.0	0.0	0.0	0.0	0.0	65.0	0.0	0.0	0.0	0.0	0.0	0.0	0.0	0.0
OTU 1306	0.0	0.0	0.0	0.0	0.0	0.0	0.0	0.0	0.0	0.0	0.0	0.0	0.0	0.0	0.0	0.0	0.0	0.0	0.0	0.0	0.0	0.0	0.0	0.0	65.0	0.0	0.0	0.0	0.0	0.0	0.0
OTU 1307	0.0	0.0	0.0	0.0	0.0	0.0	0.0	0.0	0.0	0.0	0.0	0.0	0.0	0.0	0.0	0.0	0.0	0.0	0.0	0.0	0.0	0.0	0.0	0.0	65.0	0.0	0.0	0.0	0.0	0.0	0.0
OTU 1308	15.0	14.0	0.0	0.0	0.0	0.0	0.0	0.0	0.0	0.0	0.0	0.0	0.0	0.0	0.0	0.0	6.0	15.0	0.0	10.0	0.0	0.0	0.0	0.0	4.0	0.0	0.0	0.0	0.0	0.0	0.0
OTU 1309	0.0	0.0	0.0	0.0	64.0	0.0	0.0	0.0	0.0	0.0	0.0	0.0	0.0	0.0	0.0	0.0	0.0	0.0	0.0	0.0	0.0	0.0	0.0	0.0	0.0	0.0	0.0	0.0	0.0	0.0	0.0
OTU 1310	0.0	0.0	0.0	0.0	0.0	8.0	0.0	0.0	0.0	0.0	0.0	0.0	0.0	0.0	0.0	0.0	0.0	0.0	0.0	0.0	0.0	0.0	56.0	0.0	0.0	0.0	0.0	0.0	0.0	0.0	0.0
OTU 1311	0.0	0.0	0.0	0.0	0.0	0.0	64.0	0.0	0.0	0.0	0.0	0.0	0.0	0.0	0.0	0.0	0.0	0.0	0.0	0.0	0.0	0.0	0.0	0.0	0.0	0.0	0.0	0.0	0.0	0.0	0.0
OTU 1312	0.0	0.0	0.0	0.0	0.0	0.0	21.0	0.0	0.0	0.0	0.0	0.0	0.0	0.0	0.0	0.0	0.0	0.0	0.0	0.0	0.0	0.0	0.0	0.0	0.0	29.0	0.0	14.0	0.0	0.0	0.0
OTU 1313	0.0	0.0	0.0	0.0	0.0	0.0	0.0	40.0	0.0	0.0	0.0	0.0	0.0	0.0	0.0	0.0	0.0	0.0	0.0	0.0	0.0	24.0	0.0	0.0	0.0	0.0	0.0	0.0	0.0	0.0	0.0
OTU 1314	0.0	0.0	0.0	0.0	0.0	0.0	0.0	0.0	0.0	0.0	64.0	0.0	0.0	0.0	0.0	0.0	0.0	0.0	0.0	0.0	0.0	0.0	0.0	0.0	0.0	0.0	0.0	0.0	0.0	0.0	0.0
OTU 1315	0.0	0.0	0.0	0.0	0.0	0.0	0.0	0.0	0.0	0.0	64.0	0.0	0.0	0.0	0.0	0.0	0.0	0.0	0.0	0.0	0.0	0.0	0.0	0.0	0.0	0.0	0.0	0.0	0.0	0.0	0.0
OTU 1316	0.0	0.0	0.0	0.0	0.0	0.0	0.0	0.0	0.0	0.0	0.0	64.0	0.0	0.0	0.0	0.0	0.0	0.0	0.0	0.0	0.0	0.0	0.0	0.0	0.0	0.0	0.0	0.0	0.0	0.0	0.0
OTU 1317	0.0	0.0	0.0	0.0	0.0	0.0	0.0	0.0	0.0	0.0	0.0	0.0	0.0	64.0	0.0	0.0	0.0	0.0	0.0	0.0	0.0	0.0	0.0	0.0	0.0	0.0	0.0	0.0	0.0	0.0	0.0
OTU 1318	0.0	0.0	0.0	0.0	0.0	0.0	0.0	0.0	0.0	0.0	0.0	0.0	0.0	0.0	0.0	64.0	0.0	0.0	0.0	0.0	0.0	0.0	0.0	0.0	0.0	0.0	0.0	0.0	0.0	0.0	0.0
OTU 1319	0.0	0.0	0.0	0.0	0.0	0.0	0.0	0.0	0.0	0.0	0.0	0.0	0.0	0.0	0.0	0.0	0.0	0.0	0.0	64.0	0.0	0.0	0.0	0.0	0.0	0.0	0.0	0.0	0.0	0.0	0.0
OTU 1320	0.0	0.0	0.0	0.0	0.0	0.0	0.0	0.0	0.0	0.0	0.0	0.0	0.0	0.0	0.0	0.0	0.0	0.0	0.0	0.0	0.0	0.0	64.0	0.0	0.0	0.0	0.0	0.0	0.0	0.0	0.0
OTU 1321	0.0	0.0	0.0	0.0	0.0	0.0	0.0	0.0	0.0	0.0	0.0	0.0	0.0	0.0	0.0	0.0	0.0	0.0	0.0	0.0	0.0	0.0	0.0	0.0	0.0	30.0	0.0	0.0	0.0	34.0	0.0
OTU 1322	0.0	0.0	0.0	63.0	0.0	0.0	0.0	0.0	0.0	0.0	0.0	0.0	0.0	0.0	0.0	0.0	0.0	0.0	0.0	0.0	0.0	0.0	0.0	0.0	0.0	0.0	0.0	0.0	0.0	0.0	0.0
OTU 1323	0.0	0.0	0.0	0.0	63.0	0.0	0.0	0.0	0.0	0.0	0.0	0.0	0.0	0.0	0.0	0.0	0.0	0.0	0.0	0.0	0.0	0.0	0.0	0.0	0.0	0.0	0.0	0.0	0.0	0.0	0.0
OTU 1324	0.0	0.0	0.0	0.0	0.0	27.0	0.0	0.0	0.0	0.0	0.0	0.0	12.0	0.0	0.0	0.0	0.0	0.0	24.0	0.0	0.0	0.0	0.0	0.0	0.0	0.0	0.0	0.0	0.0	0.0	0.0
OTU 1325	0.0	0.0	0.0	0.0	0.0	0.0	0.0	0.0	0.0	0.0	0.0	63.0	0.0	0.0	0.0	0.0	0.0	0.0	0.0	0.0	0.0	0.0	0.0	0.0	0.0	0.0	0.0	0.0	0.0	0.0	0.0
OTU 1326	0.0	0.0	0.0	0.0	0.0	0.0	0.0	0.0	0.0	0.0	0.0	0.0	0.0	0.0	0.0	0.0	0.0	0.0	63.0	0.0	0.0	0.0	0.0	0.0	0.0	0.0	0.0	0.0	0.0	0.0	0.0
OTU 1327	0.0	0.0	0.0	0.0	0.0	0.0	0.0	0.0	0.0	0.0	0.0	0.0	0.0	0.0	0.0	0.0	0.0	0.0	0.0	0.0	0.0	0.0	63.0	0.0	0.0	0.0	0.0	0.0	0.0	0.0	0.0
OTU 1328	0.0	0.0	0.0	0.0	0.0	0.0	0.0	0.0	0.0	0.0	0.0	0.0	0.0	0.0	0.0	0.0	0.0	0.0	0.0	0.0	0.0	0.0	0.0	63.0	0.0	0.0	0.0	0.0	0.0	0.0	0.0
OTU 1329	0.0	0.0	0.0	0.0	0.0	0.0	0.0	0.0	0.0	0.0	0.0	0.0	0.0	0.0	0.0	0.0	0.0	0.0	0.0	0.0	0.0	0.0	0.0	63.0	0.0	0.0	0.0	0.0	0.0	0.0	0.0
OTU 1330	0.0	0.0	0.0	0.0	0.0	0.0	0.0	0.0	0.0	0.0	0.0	0.0	0.0	0.0	0.0	0.0	0.0	0.0	0.0	0.0	0.0	0.0	0.0	0.0	63.0	0.0	0.0	0.0	0.0	0.0	0.0
OTU 1331	0.0	0.0	0.0	0.0	0.0	0.0	0.0	0.0	0.0	0.0	0.0	0.0	0.0	0.0	0.0	0.0	0.0	0.0	0.0	0.0	0.0	0.0	0.0	0.0	63.0	0.0	0.0	0.0	0.0	0.0	0.0
OTU 1332	0.0	0.0	38.0	0.0	0.0	0.0	0.0	0.0	0.0	0.0	0.0	0.0	0.0	0.0	0.0	0.0	0.0	0.0	0.0	0.0	0.0	0.0	24.0	0.0	0.0	0.0	0.0	0.0	0.0	0.0	0.0
OTU 1333	0.0	0.0	0.0	62.0	0.0	0.0	0.0	0.0	0.0	0.0	0.0	0.0	0.0	0.0	0.0	0.0	0.0	0.0	0.0	0.0	0.0	0.0	0.0	0.0	0.0	0.0	0.0	0.0	0.0	0.0	0.0
OTU 1334	0.0	0.0	0.0	62.0	0.0	0.0	0.0	0.0	0.0	0.0	0.0	0.0	0.0	0.0	0.0	0.0	0.0	0.0	0.0	0.0	0.0	0.0	0.0	0.0	0.0	0.0	0.0	0.0	0.0	0.0	0.0
OTU 1335	0.0	0.0	0.0	27.0	0.0	0.0	0.0	0.0	0.0	35.0	0.0	0.0	0.0	0.0	0.0	0.0	0.0	0.0	0.0	0.0	0.0	0.0	0.0	0.0	0.0	0.0	0.0	0.0	0.0	0.0	0.0
OTU 1336	0.0	0.0	0.0	0.0	62.0	0.0	0.0	0.0	0.0	0.0	0.0	0.0	0.0	0.0	0.0	0.0	0.0	0.0	0.0	0.0	0.0	0.0	0.0	0.0	0.0	0.0	0.0	0.0	0.0	0.0	0.0
OTU 1337	0.0	0.0	0.0	0.0	13.0	7.0	6.0	0.0	0.0	0.0	10.0	0.0	18.0	0.0	0.0	0.0	8.0	0.0	0.0	0.0	0.0	0.0	0.0	0.0	0.0	0.0	0.0	0.0	0.0	0.0	0.0
OTU 1338	0.0	0.0	0.0	0.0	0.0	0.0	62.0	0.0	0.0	0.0	0.0	0.0	0.0	0.0	0.0	0.0	0.0	0.0	0.0	0.0	0.0	0.0	0.0	0.0	0.0	0.0	0.0	0.0	0.0	0.0	0.0
OTU 1339	0.0	0.0	0.0	0.0	0.0	0.0	0.0	15.0	0.0	0.0	0.0	19.0	0.0	0.0	0.0	0.0	0.0	0.0	16.0	0.0	0.0	0.0	0.0	0.0	0.0	0.0	0.0	12.0	0.0	0.0	0.0
OTU 1340	0.0	0.0	0.0	0.0	0.0	0.0	0.0	0.0	0.0	0.0	62.0	0.0	0.0	0.0	0.0	0.0	0.0	0.0	0.0	0.0	0.0	0.0	0.0	0.0	0.0	0.0	0.0	0.0	0.0	0.0	0.0
OTU 1341	0.0	0.0	0.0	0.0	0.0	0.0	0.0	0.0	0.0	0.0	0.0	0.0	0.0	62.0	0.0	0.0	0.0	0.0	0.0	0.0	0.0	0.0	0.0	0.0	0.0	0.0	0.0	0.0	0.0	0.0	0.0
OTU 1342	0.0	0.0	0.0	0.0	0.0	0.0	0.0	0.0	0.0	0.0	0.0	0.0	0.0	0.0	0.0	62.0	0.0	0.0	0.0	0.0	0.0	0.0	0.0	0.0	0.0	0.0	0.0	0.0	0.0	0.0	0.0
OTU 1343	0.0	0.0	0.0	0.0	0.0	0.0	0.0	0.0	0.0	0.0	0.0	0.0	0.0	0.0	0.0	0.0	0.0	0.0	0.0	0.0	62.0	0.0	0.0	0.0	0.0	0.0	0.0	0.0	0.0	0.0	0.0
OTU 1344	0.0	0.0	0.0	0.0	0.0	0.0	0.0	0.0	0.0	0.0	0.0	0.0	0.0	0.0	0.0	0.0	0.0	0.0	0.0	0.0	62.0	0.0	0.0	0.0	0.0	0.0	0.0	0.0	0.0	0.0	0.0
OTU 1345	0.0	0.0	0.0	0.0	0.0	0.0	0.0	0.0	0.0	0.0	0.0	0.0	0.0	0.0	0.0	0.0	0.0	0.0	0.0	0.0	0.0	0.0	0.0	0.0	0.0	62.0	0.0	0.0	0.0	0.0	0.0
OTU 1346	61.0	0.0	0.0	0.0	0.0	0.0	0.0	0.0	0.0	0.0	0.0	0.0	0.0	0.0	0.0	0.0	0.0	0.0	0.0	0.0	0.0	0.0	0.0	0.0	0.0	0.0	0.0	0.0	0.0	0.0	0.0
OTU 1347	0.0	0.0	0.0	0.0	31.0	0.0	0.0	0.0	30.0	0.0	0.0	0.0	0.0	0.0	0.0	0.0	0.0	0.0	0.0	0.0	0.0	0.0	0.0	0.0	0.0	0.0	0.0	0.0	0.0	0.0	0.0
OTU 1348	0.0	0.0	0.0	0.0	20.0	0.0	0.0	0.0	0.0	0.0	0.0	0.0	0.0	4.0	0.0	0.0	0.0	0.0	31.0	0.0	0.0	0.0	6.0	0.0	0.0	0.0	0.0	0.0	0.0	0.0	0.0
OTU 1349	0.0	0.0	0.0	0.0	0.0	0.0	61.0	0.0	0.0	0.0	0.0	0.0	0.0	0.0	0.0	0.0	0.0	0.0	0.0	0.0	0.0	0.0	0.0	0.0	0.0	0.0	0.0	0.0	0.0	0.0	0.0
OTU 1350	0.0	0.0	0.0	0.0	0.0	0.0	0.0	0.0	0.0	61.0	0.0	0.0	0.0	0.0	0.0	0.0	0.0	0.0	0.0	0.0	0.0	0.0	0.0	0.0	0.0	0.0	0.0	0.0	0.0	0.0	0.0
OTU 1351	0.0	0.0	0.0	0.0	0.0	0.0	0.0	0.0	0.0	34.0	27.0	0.0	0.0	0.0	0.0	0.0	0.0	0.0	0.0	0.0	0.0	0.0	0.0	0.0	0.0	0.0	0.0	0.0	0.0	0.0	0.0
OTU 1352	0.0	0.0	0.0	0.0	0.0	0.0	0.0	0.0	0.0	0.0	0.0	61.0	0.0	0.0	0.0	0.0	0.0	0.0	0.0	0.0	0.0	0.0	0.0	0.0	0.0	0.0	0.0	0.0	0.0	0.0	0.0
OTU 1353	0.0	0.0	0.0	0.0	0.0	0.0	0.0	0.0	0.0	0.0	0.0	0.0	61.0	0.0	0.0	0.0	0.0	0.0	0.0	0.0	0.0	0.0	0.0	0.0	0.0	0.0	0.0	0.0	0.0	0.0	0.0
OTU 1354	0.0	0.0	0.0	0.0	0.0	0.0	0.0	0.0	0.0	0.0	0.0	0.0	61.0	0.0	0.0	0.0	0.0	0.0	0.0	0.0	0.0	0.0	0.0	0.0	0.0	0.0	0.0	0.0	0.0	0.0	0.0
OTU 1355	0.0	0.0	0.0	0.0	0.0	0.0	0.0	0.0	0.0	0.0	0.0	0.0	0.0	0.0	0.0	0.0	0.0	0.0	0.0	0.0	61.0	0.0	0.0	0.0	0.0	0.0	0.0	0.0	0.0	0.0	0.0
OTU 1356	0.0	0.0	0.0	0.0	0.0	0.0	0.0	0.0	0.0	0.0	0.0	0.0	0.0	0.0	0.0	0.0	0.0	0.0	0.0	0.0	0.0	0.0	61.0	0.0	0.0	0.0	0.0	0.0	0.0	0.0	0.0
OTU 1357	0.0	0.0	0.0	0.0	0.0	0.0	0.0	0.0	0.0	0.0	0.0	0.0	0.0	0.0	0.0	0.0	0.0	0.0	0.0	0.0	0.0	0.0	0.0	61.0	0.0	0.0	0.0	0.0	0.0	0.0	0.0
OTU 1358	0.0	0.0	0.0	0.0	0.0	0.0	0.0	0.0	0.0	0.0	0.0	0.0	0.0	0.0	0.0	0.0	0.0	0.0	0.0	0.0	0.0	0.0	0.0	0.0	61.0	0.0	0.0	0.0	0.0	0.0	0.0
OTU 1359	0.0	0.0	0.0	0.0	0.0	0.0	0.0	0.0	0.0	0.0	0.0	0.0	0.0	0.0	0.0	0.0	0.0	0.0	0.0	0.0	0.0	0.0	0.0	0.0	0.0	0.0	0.0	61.0	0.0	0.0	0.0
OTU 1360	0.0	0.0	0.0	0.0	0.0	0.0	0.0	0.0	0.0	0.0	0.0	0.0	0.0	0.0	0.0	0.0	0.0	0.0	0.0	0.0	0.0	0.0	0.0	0.0	0.0	0.0	0.0	61.0	0.0	0.0	0.0
OTU 1361	0.0	0.0	0.0	8.0	0.0	0.0	0.0	0.0	10.0	0.0	0.0	0.0	0.0	0.0	0.0	0.0	0.0	0.0	0.0	25.0	0.0	9.0	0.0	0.0	8.0	0.0	0.0	0.0	0.0	0.0	0.0
OTU 1362	0.0	0.0	0.0	0.0	60.0	0.0	0.0	0.0	0.0	0.0	0.0	0.0	0.0	0.0	0.0	0.0	0.0	0.0	0.0	0.0	0.0	0.0	0.0	0.0	0.0	0.0	0.0	0.0	0.0	0.0	0.0
OTU 1363	0.0	0.0	0.0	0.0	0.0	0.0	0.0	0.0	60.0	0.0	0.0	0.0	0.0	0.0	0.0	0.0	0.0	0.0	0.0	0.0	0.0	0.0	0.0	0.0	0.0	0.0	0.0	0.0	0.0	0.0	0.0
OTU 1364	0.0	0.0	0.0	0.0	0.0	0.0	0.0	0.0	0.0	60.0	0.0	0.0	0.0	0.0	0.0	0.0	0.0	0.0	0.0	0.0	0.0	0.0	0.0	0.0	0.0	0.0	0.0	0.0	0.0	0.0	0.0
OTU 1365	0.0	0.0	0.0	0.0	0.0	0.0	0.0	0.0	0.0	0.0	60.0	0.0	0.0	0.0	0.0	0.0	0.0	0.0	0.0	0.0	0.0	0.0	0.0	0.0	0.0	0.0	0.0	0.0	0.0	0.0	0.0
OTU 1366	0.0	0.0	0.0	0.0	0.0	0.0	0.0	0.0	0.0	0.0	60.0	0.0	0.0	0.0	0.0	0.0	0.0	0.0	0.0	0.0	0.0	0.0	0.0	0.0	0.0	0.0	0.0	0.0	0.0	0.0	0.0
OTU 1367	0.0	0.0	0.0	0.0	0.0	0.0	0.0	0.0	0.0	0.0	0.0	0.0	0.0	0.0	0.0	0.0	0.0	0.0	0.0	0.0	60.0	0.0	0.0	0.0	0.0	0.0	0.0	0.0	0.0	0.0	0.0
OTU 1368	0.0	0.0	0.0	0.0	0.0	0.0	0.0	0.0	0.0	0.0	0.0	0.0	0.0	0.0	0.0	0.0	0.0	0.0	0.0	0.0	0.0	0.0	60.0	0.0	0.0	0.0	0.0	0.0	0.0	0.0	0.0
OTU 1369	0.0	0.0	0.0	0.0	0.0	0.0	0.0	0.0	0.0	0.0	0.0	0.0	0.0	0.0	0.0	0.0	0.0	0.0	0.0	0.0	0.0	0.0	0.0	0.0	0.0	0.0	60.0	0.0	0.0	0.0	0.0
OTU 1370	0.0	0.0	0.0	0.0	0.0	0.0	0.0	0.0	0.0	0.0	0.0	0.0	0.0	0.0	0.0	0.0	0.0	0.0	0.0	0.0	0.0	0.0	0.0	0.0	0.0	0.0	0.0	0.0	60.0	0.0	0.0
OTU 1371	14.0	0.0	0.0	0.0	0.0	0.0	26.0	0.0	0.0	0.0	0.0	0.0	0.0	0.0	0.0	0.0	0.0	0.0	0.0	0.0	0.0	0.0	0.0	0.0	0.0	0.0	0.0	0.0	0.0	19.0	0.0
OTU 1372	0.0	59.0	0.0	0.0	0.0	0.0	0.0	0.0	0.0	0.0	0.0	0.0	0.0	0.0	0.0	0.0	0.0	0.0	0.0	0.0	0.0	0.0	0.0	0.0	0.0	0.0	0.0	0.0	0.0	0.0	0.0
OTU 1373	0.0	44.0	0.0	0.0	0.0	0.0	0.0	0.0	0.0	0.0	0.0	0.0	0.0	0.0	0.0	0.0	0.0	0.0	0.0	0.0	0.0	0.0	0.0	0.0	0.0	0.0	0.0	0.0	15.0	0.0	0.0
OTU 1374	0.0	0.0	0.0	0.0	56.0	0.0	0.0	0.0	0.0	0.0	0.0	0.0	0.0	0.0	0.0	0.0	0.0	0.0	0.0	0.0	0.0	0.0	0.0	3.0	0.0	0.0	0.0	0.0	0.0	0.0	0.0
OTU 1375	0.0	0.0	0.0	0.0	0.0	19.0	0.0	0.0	0.0	0.0	0.0	16.0	0.0	0.0	0.0	0.0	15.0	9.0	0.0	0.0	0.0	0.0	0.0	0.0	0.0	0.0	0.0	0.0	0.0	0.0	0.0
OTU 1376	0.0	0.0	0.0	0.0	0.0	0.0	0.0	0.0	59.0	0.0	0.0	0.0	0.0	0.0	0.0	0.0	0.0	0.0	0.0	0.0	0.0	0.0	0.0	0.0	0.0	0.0	0.0	0.0	0.0	0.0	0.0
OTU 1377	0.0	0.0	0.0	0.0	0.0	0.0	0.0	0.0	0.0	0.0	59.0	0.0	0.0	0.0	0.0	0.0	0.0	0.0	0.0	0.0	0.0	0.0	0.0	0.0	0.0	0.0	0.0	0.0	0.0	0.0	0.0
OTU 1378	0.0	0.0	0.0	0.0	0.0	0.0	0.0	0.0	0.0	0.0	59.0	0.0	0.0	0.0	0.0	0.0	0.0	0.0	0.0	0.0	0.0	0.0	0.0	0.0	0.0	0.0	0.0	0.0	0.0	0.0	0.0
OTU 1379	0.0	0.0	0.0	0.0	0.0	0.0	0.0	0.0	0.0	0.0	0.0	59.0	0.0	0.0	0.0	0.0	0.0	0.0	0.0	0.0	0.0	0.0	0.0	0.0	0.0	0.0	0.0	0.0	0.0	0.0	0.0
OTU 1380	0.0	0.0	0.0	0.0	0.0	0.0	0.0	0.0	0.0	0.0	0.0	59.0	0.0	0.0	0.0	0.0	0.0	0.0	0.0	0.0	0.0	0.0	0.0	0.0	0.0	0.0	0.0	0.0	0.0	0.0	0.0
OTU 1381	0.0	0.0	0.0	0.0	0.0	0.0	0.0	0.0	0.0	0.0	0.0	0.0	59.0	0.0	0.0	0.0	0.0	0.0	0.0	0.0	0.0	0.0	0.0	0.0	0.0	0.0	0.0	0.0	0.0	0.0	0.0
OTU 1382	0.0	0.0	0.0	0.0	0.0	0.0	0.0	0.0	0.0	0.0	0.0	0.0	0.0	0.0	0.0	0.0	0.0	0.0	0.0	0.0	0.0	59.0	0.0	0.0	0.0	0.0	0.0	0.0	0.0	0.0	0.0
OTU 1383	0.0	0.0	0.0	0.0	0.0	0.0	0.0	0.0	0.0	0.0	0.0	0.0	0.0	0.0	0.0	0.0	0.0	0.0	0.0	0.0	0.0	0.0	0.0	0.0	0.0	0.0	0.0	0.0	0.0	0.0	59.0
OTU 1384	0.0	0.0	0.0	58.0	0.0	0.0	0.0	0.0	0.0	0.0	0.0	0.0	0.0	0.0	0.0	0.0	0.0	0.0	0.0	0.0	0.0	0.0	0.0	0.0	0.0	0.0	0.0	0.0	0.0	0.0	0.0
OTU 1385	0.0	0.0	0.0	58.0	0.0	0.0	0.0	0.0	0.0	0.0	0.0	0.0	0.0	0.0	0.0	0.0	0.0	0.0	0.0	0.0	0.0	0.0	0.0	0.0	0.0	0.0	0.0	0.0	0.0	0.0	0.0
OTU 1386	0.0	0.0	0.0	0.0	58.0	0.0	0.0	0.0	0.0	0.0	0.0	0.0	0.0	0.0	0.0	0.0	0.0	0.0	0.0	0.0	0.0	0.0	0.0	0.0	0.0	0.0	0.0	0.0	0.0	0.0	0.0
OTU 1387	0.0	0.0	0.0	0.0	58.0	0.0	0.0	0.0	0.0	0.0	0.0	0.0	0.0	0.0	0.0	0.0	0.0	0.0	0.0	0.0	0.0	0.0	0.0	0.0	0.0	0.0	0.0	0.0	0.0	0.0	0.0
OTU 1388	0.0	0.0	0.0	0.0	58.0	0.0	0.0	0.0	0.0	0.0	0.0	0.0	0.0	0.0	0.0	0.0	0.0	0.0	0.0	0.0	0.0	0.0	0.0	0.0	0.0	0.0	0.0	0.0	0.0	0.0	0.0
OTU 1389	0.0	0.0	0.0	0.0	58.0	0.0	0.0	0.0	0.0	0.0	0.0	0.0	0.0	0.0	0.0	0.0	0.0	0.0	0.0	0.0	0.0	0.0	0.0	0.0	0.0	0.0	0.0	0.0	0.0	0.0	0.0
OTU 1390	0.0	0.0	0.0	0.0	0.0	58.0	0.0	0.0	0.0	0.0	0.0	0.0	0.0	0.0	0.0	0.0	0.0	0.0	0.0	0.0	0.0	0.0	0.0	0.0	0.0	0.0	0.0	0.0	0.0	0.0	0.0
OTU 1391	0.0	0.0	0.0	0.0	0.0	0.0	58.0	0.0	0.0	0.0	0.0	0.0	0.0	0.0	0.0	0.0	0.0	0.0	0.0	0.0	0.0	0.0	0.0	0.0	0.0	0.0	0.0	0.0	0.0	0.0	0.0
OTU 1392	0.0	0.0	0.0	0.0	0.0	0.0	12.0	0.0	0.0	0.0	19.0	0.0	0.0	0.0	0.0	0.0	0.0	0.0	0.0	2.0	0.0	0.0	0.0	0.0	0.0	0.0	0.0	0.0	0.0	25.0	0.0
OTU 1393	0.0	0.0	0.0	0.0	0.0	0.0	0.0	0.0	0.0	58.0	0.0	0.0	0.0	0.0	0.0	0.0	0.0	0.0	0.0	0.0	0.0	0.0	0.0	0.0	0.0	0.0	0.0	0.0	0.0	0.0	0.0
OTU 1394	0.0	0.0	0.0	0.0	0.0	0.0	0.0	0.0	0.0	0.0	58.0	0.0	0.0	0.0	0.0	0.0	0.0	0.0	0.0	0.0	0.0	0.0	0.0	0.0	0.0	0.0	0.0	0.0	0.0	0.0	0.0
OTU 1395	0.0	0.0	0.0	0.0	0.0	0.0	0.0	0.0	0.0	0.0	0.0	58.0	0.0	0.0	0.0	0.0	0.0	0.0	0.0	0.0	0.0	0.0	0.0	0.0	0.0	0.0	0.0	0.0	0.0	0.0	0.0
OTU 1396	0.0	0.0	0.0	0.0	0.0	0.0	0.0	0.0	0.0	0.0	0.0	0.0	0.0	0.0	0.0	58.0	0.0	0.0	0.0	0.0	0.0	0.0	0.0	0.0	0.0	0.0	0.0	0.0	0.0	0.0	0.0
OTU 1397	0.0	0.0	0.0	0.0	0.0	0.0	0.0	0.0	0.0	0.0	0.0	0.0	0.0	0.0	0.0	0.0	0.0	0.0	0.0	58.0	0.0	0.0	0.0	0.0	0.0	0.0	0.0	0.0	0.0	0.0	0.0
OTU 1398	0.0	0.0	0.0	0.0	0.0	0.0	0.0	0.0	0.0	0.0	0.0	0.0	0.0	0.0	0.0	0.0	0.0	0.0	0.0	0.0	0.0	58.0	0.0	0.0	0.0	0.0	0.0	0.0	0.0	0.0	0.0
OTU 1399	0.0	0.0	0.0	0.0	0.0	0.0	0.0	0.0	0.0	0.0	0.0	0.0	0.0	0.0	0.0	0.0	0.0	0.0	0.0	0.0	0.0	58.0	0.0	0.0	0.0	0.0	0.0	0.0	0.0	0.0	0.0
OTU 1400	0.0	0.0	0.0	0.0	0.0	0.0	0.0	0.0	0.0	0.0	0.0	0.0	0.0	0.0	0.0	0.0	0.0	0.0	0.0	0.0	0.0	0.0	0.0	33.0	0.0	0.0	0.0	0.0	25.0	0.0	0.0
OTU 1401	0.0	0.0	0.0	0.0	0.0	0.0	0.0	0.0	0.0	0.0	0.0	0.0	0.0	0.0	0.0	0.0	0.0	0.0	0.0	0.0	0.0	0.0	0.0	0.0	58.0	0.0	0.0	0.0	0.0	0.0	0.0
OTU 1402	0.0	57.0	0.0	0.0	0.0	0.0	0.0	0.0	0.0	0.0	0.0	0.0	0.0	0.0	0.0	0.0	0.0	0.0	0.0	0.0	0.0	0.0	0.0	0.0	0.0	0.0	0.0	0.0	0.0	0.0	0.0
OTU 1403	0.0	0.0	0.0	13.0	0.0	0.0	0.0	0.0	0.0	0.0	0.0	0.0	0.0	0.0	0.0	0.0	0.0	0.0	0.0	0.0	15.0	0.0	29.0	0.0	0.0	0.0	0.0	0.0	0.0	0.0	0.0
OTU 1404	0.0	0.0	0.0	0.0	57.0	0.0	0.0	0.0	0.0	0.0	0.0	0.0	0.0	0.0	0.0	0.0	0.0	0.0	0.0	0.0	0.0	0.0	0.0	0.0	0.0	0.0	0.0	0.0	0.0	0.0	0.0
OTU 1405	0.0	0.0	0.0	0.0	57.0	0.0	0.0	0.0	0.0	0.0	0.0	0.0	0.0	0.0	0.0	0.0	0.0	0.0	0.0	0.0	0.0	0.0	0.0	0.0	0.0	0.0	0.0	0.0	0.0	0.0	0.0
OTU 1406	0.0	0.0	0.0	0.0	57.0	0.0	0.0	0.0	0.0	0.0	0.0	0.0	0.0	0.0	0.0	0.0	0.0	0.0	0.0	0.0	0.0	0.0	0.0	0.0	0.0	0.0	0.0	0.0	0.0	0.0	0.0
OTU 1407	0.0	0.0	0.0	0.0	10.0	0.0	19.0	0.0	0.0	0.0	0.0	0.0	0.0	0.0	0.0	0.0	0.0	0.0	28.0	0.0	0.0	0.0	0.0	0.0	0.0	0.0	0.0	0.0	0.0	0.0	0.0
OTU 1408	0.0	0.0	0.0	0.0	0.0	0.0	57.0	0.0	0.0	0.0	0.0	0.0	0.0	0.0	0.0	0.0	0.0	0.0	0.0	0.0	0.0	0.0	0.0	0.0	0.0	0.0	0.0	0.0	0.0	0.0	0.0
OTU 1409	0.0	0.0	0.0	0.0	0.0	0.0	57.0	0.0	0.0	0.0	0.0	0.0	0.0	0.0	0.0	0.0	0.0	0.0	0.0	0.0	0.0	0.0	0.0	0.0	0.0	0.0	0.0	0.0	0.0	0.0	0.0
OTU 1410	0.0	0.0	0.0	0.0	0.0	0.0	57.0	0.0	0.0	0.0	0.0	0.0	0.0	0.0	0.0	0.0	0.0	0.0	0.0	0.0	0.0	0.0	0.0	0.0	0.0	0.0	0.0	0.0	0.0	0.0	0.0
OTU 1411	0.0	0.0	0.0	0.0	0.0	0.0	0.0	0.0	0.0	57.0	0.0	0.0	0.0	0.0	0.0	0.0	0.0	0.0	0.0	0.0	0.0	0.0	0.0	0.0	0.0	0.0	0.0	0.0	0.0	0.0	0.0
OTU 1412	0.0	0.0	0.0	0.0	0.0	0.0	0.0	0.0	0.0	57.0	0.0	0.0	0.0	0.0	0.0	0.0	0.0	0.0	0.0	0.0	0.0	0.0	0.0	0.0	0.0	0.0	0.0	0.0	0.0	0.0	0.0
OTU 1413	0.0	0.0	0.0	0.0	0.0	0.0	0.0	0.0	0.0	0.0	0.0	57.0	0.0	0.0	0.0	0.0	0.0	0.0	0.0	0.0	0.0	0.0	0.0	0.0	0.0	0.0	0.0	0.0	0.0	0.0	0.0
OTU 1414	0.0	0.0	0.0	0.0	0.0	0.0	0.0	0.0	0.0	0.0	0.0	57.0	0.0	0.0	0.0	0.0	0.0	0.0	0.0	0.0	0.0	0.0	0.0	0.0	0.0	0.0	0.0	0.0	0.0	0.0	0.0
OTU 1415	0.0	0.0	0.0	0.0	0.0	0.0	0.0	0.0	0.0	0.0	0.0	0.0	0.0	57.0	0.0	0.0	0.0	0.0	0.0	0.0	0.0	0.0	0.0	0.0	0.0	0.0	0.0	0.0	0.0	0.0	0.0
OTU 1416	0.0	0.0	0.0	0.0	0.0	0.0	0.0	0.0	0.0	0.0	0.0	0.0	0.0	0.0	0.0	57.0	0.0	0.0	0.0	0.0	0.0	0.0	0.0	0.0	0.0	0.0	0.0	0.0	0.0	0.0	0.0
OTU 1417	0.0	0.0	0.0	0.0	0.0	0.0	0.0	0.0	0.0	0.0	0.0	0.0	0.0	0.0	0.0	0.0	0.0	0.0	0.0	0.0	57.0	0.0	0.0	0.0	0.0	0.0	0.0	0.0	0.0	0.0	0.0
OTU 1418	0.0	0.0	0.0	0.0	0.0	0.0	0.0	0.0	0.0	0.0	0.0	0.0	0.0	0.0	0.0	0.0	0.0	0.0	0.0	0.0	0.0	0.0	0.0	0.0	0.0	57.0	0.0	0.0	0.0	0.0	0.0
OTU 1419	0.0	0.0	0.0	0.0	0.0	0.0	0.0	0.0	0.0	0.0	0.0	0.0	0.0	0.0	0.0	0.0	0.0	0.0	0.0	0.0	0.0	0.0	0.0	0.0	0.0	0.0	57.0	0.0	0.0	0.0	0.0
OTU 1420	0.0	0.0	0.0	0.0	0.0	0.0	0.0	0.0	0.0	0.0	0.0	0.0	0.0	0.0	0.0	0.0	0.0	0.0	0.0	0.0	0.0	0.0	0.0	0.0	0.0	0.0	0.0	57.0	0.0	0.0	0.0
OTU 1421	0.0	0.0	0.0	0.0	0.0	0.0	0.0	0.0	0.0	0.0	0.0	0.0	0.0	0.0	0.0	0.0	0.0	0.0	0.0	0.0	0.0	0.0	0.0	0.0	0.0	0.0	0.0	57.0	0.0	0.0	0.0
OTU 1422	0.0	0.0	0.0	0.0	9.0	0.0	0.0	0.0	0.0	9.0	0.0	10.0	0.0	22.0	0.0	0.0	0.0	0.0	0.0	0.0	0.0	0.0	0.0	0.0	0.0	0.0	0.0	0.0	0.0	0.0	6.0
OTU 1423	0.0	0.0	0.0	0.0	0.0	0.0	56.0	0.0	0.0	0.0	0.0	0.0	0.0	0.0	0.0	0.0	0.0	0.0	0.0	0.0	0.0	0.0	0.0	0.0	0.0	0.0	0.0	0.0	0.0	0.0	0.0
OTU 1424	0.0	0.0	0.0	0.0	0.0	0.0	0.0	0.0	0.0	0.0	56.0	0.0	0.0	0.0	0.0	0.0	0.0	0.0	0.0	0.0	0.0	0.0	0.0	0.0	0.0	0.0	0.0	0.0	0.0	0.0	0.0
OTU 1425	0.0	0.0	0.0	0.0	0.0	0.0	0.0	0.0	0.0	0.0	0.0	0.0	0.0	0.0	56.0	0.0	0.0	0.0	0.0	0.0	0.0	0.0	0.0	0.0	0.0	0.0	0.0	0.0	0.0	0.0	0.0
OTU 1426	0.0	0.0	0.0	0.0	0.0	0.0	0.0	0.0	0.0	0.0	0.0	0.0	0.0	0.0	0.0	0.0	0.0	0.0	0.0	56.0	0.0	0.0	0.0	0.0	0.0	0.0	0.0	0.0	0.0	0.0	0.0
OTU 1427	0.0	0.0	0.0	0.0	0.0	0.0	0.0	0.0	0.0	0.0	0.0	0.0	0.0	0.0	0.0	0.0	0.0	0.0	0.0	0.0	0.0	0.0	0.0	0.0	0.0	56.0	0.0	0.0	0.0	0.0	0.0
OTU 1428	0.0	0.0	0.0	0.0	0.0	0.0	0.0	0.0	0.0	0.0	0.0	0.0	0.0	0.0	0.0	0.0	0.0	0.0	0.0	0.0	0.0	0.0	0.0	0.0	0.0	33.0	0.0	23.0	0.0	0.0	0.0
OTU 1429	0.0	55.0	0.0	0.0	0.0	0.0	0.0	0.0	0.0	0.0	0.0	0.0	0.0	0.0	0.0	0.0	0.0	0.0	0.0	0.0	0.0	0.0	0.0	0.0	0.0	0.0	0.0	0.0	0.0	0.0	0.0
OTU 1430	0.0	0.0	0.0	55.0	0.0	0.0	0.0	0.0	0.0	0.0	0.0	0.0	0.0	0.0	0.0	0.0	0.0	0.0	0.0	0.0	0.0	0.0	0.0	0.0	0.0	0.0	0.0	0.0	0.0	0.0	0.0
OTU 1431	0.0	0.0	0.0	55.0	0.0	0.0	0.0	0.0	0.0	0.0	0.0	0.0	0.0	0.0	0.0	0.0	0.0	0.0	0.0	0.0	0.0	0.0	0.0	0.0	0.0	0.0	0.0	0.0	0.0	0.0	0.0
OTU 1432	0.0	0.0	0.0	0.0	55.0	0.0	0.0	0.0	0.0	0.0	0.0	0.0	0.0	0.0	0.0	0.0	0.0	0.0	0.0	0.0	0.0	0.0	0.0	0.0	0.0	0.0	0.0	0.0	0.0	0.0	0.0
OTU 1433	0.0	0.0	0.0	0.0	7.0	10.0	0.0	0.0	1.0	0.0	0.0	0.0	0.0	0.0	0.0	0.0	0.0	0.0	0.0	0.0	0.0	3.0	1.0	0.0	0.0	12.0	0.0	21.0	0.0	0.0	0.0
OTU 1434	0.0	0.0	0.0	0.0	0.0	0.0	55.0	0.0	0.0	0.0	0.0	0.0	0.0	0.0	0.0	0.0	0.0	0.0	0.0	0.0	0.0	0.0	0.0	0.0	0.0	0.0	0.0	0.0	0.0	0.0	0.0
OTU 1435	0.0	0.0	0.0	0.0	0.0	0.0	55.0	0.0	0.0	0.0	0.0	0.0	0.0	0.0	0.0	0.0	0.0	0.0	0.0	0.0	0.0	0.0	0.0	0.0	0.0	0.0	0.0	0.0	0.0	0.0	0.0
OTU 1436	0.0	0.0	0.0	0.0	0.0	0.0	20.0	0.0	0.0	0.0	8.0	8.0	0.0	0.0	0.0	0.0	0.0	0.0	0.0	0.0	0.0	0.0	0.0	0.0	0.0	0.0	0.0	0.0	19.0	0.0	0.0
OTU 1437	0.0	0.0	0.0	0.0	0.0	0.0	0.0	55.0	0.0	0.0	0.0	0.0	0.0	0.0	0.0	0.0	0.0	0.0	0.0	0.0	0.0	0.0	0.0	0.0	0.0	0.0	0.0	0.0	0.0	0.0	0.0
OTU 1438	0.0	0.0	0.0	0.0	0.0	0.0	0.0	0.0	0.0	55.0	0.0	0.0	0.0	0.0	0.0	0.0	0.0	0.0	0.0	0.0	0.0	0.0	0.0	0.0	0.0	0.0	0.0	0.0	0.0	0.0	0.0
OTU 1439	0.0	0.0	0.0	0.0	0.0	0.0	0.0	0.0	0.0	17.0	38.0	0.0	0.0	0.0	0.0	0.0	0.0	0.0	0.0	0.0	0.0	0.0	0.0	0.0	0.0	0.0	0.0	0.0	0.0	0.0	0.0
OTU 1440	0.0	0.0	0.0	0.0	0.0	0.0	0.0	0.0	0.0	0.0	55.0	0.0	0.0	0.0	0.0	0.0	0.0	0.0	0.0	0.0	0.0	0.0	0.0	0.0	0.0	0.0	0.0	0.0	0.0	0.0	0.0
OTU 1441	0.0	0.0	0.0	0.0	0.0	0.0	0.0	0.0	0.0	0.0	0.0	0.0	0.0	0.0	0.0	39.0	0.0	0.0	0.0	0.0	0.0	0.0	0.0	0.0	0.0	0.0	0.0	0.0	0.0	16.0	0.0
OTU 1442	0.0	0.0	0.0	0.0	0.0	0.0	0.0	0.0	0.0	0.0	0.0	0.0	0.0	0.0	0.0	0.0	0.0	0.0	0.0	0.0	0.0	55.0	0.0	0.0	0.0	0.0	0.0	0.0	0.0	0.0	0.0
OTU 1443	0.0	54.0	0.0	0.0	0.0	0.0	0.0	0.0	0.0	0.0	0.0	0.0	0.0	0.0	0.0	0.0	0.0	0.0	0.0	0.0	0.0	0.0	0.0	0.0	0.0	0.0	0.0	0.0	0.0	0.0	0.0
OTU 1444	0.0	0.0	0.0	54.0	0.0	0.0	0.0	0.0	0.0	0.0	0.0	0.0	0.0	0.0	0.0	0.0	0.0	0.0	0.0	0.0	0.0	0.0	0.0	0.0	0.0	0.0	0.0	0.0	0.0	0.0	0.0
OTU 1445	0.0	0.0	0.0	0.0	30.0	9.0	0.0	0.0	0.0	0.0	0.0	15.0	0.0	0.0	0.0	0.0	0.0	0.0	0.0	0.0	0.0	0.0	0.0	0.0	0.0	0.0	0.0	0.0	0.0	0.0	0.0
OTU 1446	0.0	0.0	0.0	0.0	0.0	0.0	16.0	0.0	0.0	0.0	0.0	0.0	0.0	0.0	0.0	0.0	0.0	0.0	0.0	0.0	14.0	0.0	0.0	0.0	0.0	0.0	0.0	0.0	0.0	0.0	24.0
OTU 1447	0.0	0.0	0.0	0.0	0.0	0.0	0.0	0.0	0.0	0.0	54.0	0.0	0.0	0.0	0.0	0.0	0.0	0.0	0.0	0.0	0.0	0.0	0.0	0.0	0.0	0.0	0.0	0.0	0.0	0.0	0.0
OTU 1448	0.0	0.0	0.0	0.0	0.0	0.0	0.0	0.0	0.0	0.0	54.0	0.0	0.0	0.0	0.0	0.0	0.0	0.0	0.0	0.0	0.0	0.0	0.0	0.0	0.0	0.0	0.0	0.0	0.0	0.0	0.0
OTU 1449	0.0	0.0	0.0	0.0	0.0	0.0	0.0	0.0	0.0	0.0	0.0	54.0	0.0	0.0	0.0	0.0	0.0	0.0	0.0	0.0	0.0	0.0	0.0	0.0	0.0	0.0	0.0	0.0	0.0	0.0	0.0
OTU 1450	0.0	0.0	0.0	0.0	0.0	0.0	0.0	0.0	0.0	0.0	0.0	0.0	0.0	0.0	0.0	0.0	0.0	0.0	34.0	0.0	0.0	0.0	0.0	0.0	0.0	0.0	0.0	0.0	0.0	20.0	0.0
OTU 1451	0.0	0.0	0.0	0.0	0.0	0.0	0.0	0.0	0.0	0.0	0.0	0.0	0.0	0.0	0.0	0.0	0.0	0.0	0.0	0.0	54.0	0.0	0.0	0.0	0.0	0.0	0.0	0.0	0.0	0.0	0.0
OTU 1452	0.0	0.0	0.0	0.0	0.0	0.0	0.0	0.0	0.0	0.0	0.0	0.0	0.0	0.0	0.0	0.0	0.0	0.0	0.0	0.0	54.0	0.0	0.0	0.0	0.0	0.0	0.0	0.0	0.0	0.0	0.0
OTU 1453	0.0	0.0	0.0	0.0	0.0	0.0	0.0	0.0	0.0	0.0	0.0	0.0	0.0	0.0	0.0	0.0	0.0	0.0	0.0	0.0	0.0	0.0	54.0	0.0	0.0	0.0	0.0	0.0	0.0	0.0	0.0
OTU 1454	0.0	0.0	0.0	0.0	0.0	0.0	0.0	0.0	0.0	0.0	0.0	0.0	0.0	0.0	0.0	0.0	0.0	0.0	0.0	0.0	0.0	0.0	0.0	54.0	0.0	0.0	0.0	0.0	0.0	0.0	0.0
OTU 1455	0.0	0.0	0.0	0.0	0.0	0.0	0.0	0.0	0.0	0.0	0.0	0.0	0.0	0.0	0.0	0.0	0.0	0.0	0.0	0.0	0.0	0.0	0.0	0.0	54.0	0.0	0.0	0.0	0.0	0.0	0.0
OTU 1456	0.0	0.0	0.0	0.0	0.0	0.0	0.0	0.0	0.0	0.0	0.0	0.0	0.0	0.0	0.0	0.0	0.0	0.0	0.0	0.0	0.0	0.0	0.0	0.0	0.0	0.0	0.0	0.0	0.0	0.0	54.0
OTU 1457	0.0	0.0	11.0	0.0	9.0	0.0	0.0	0.0	0.0	0.0	0.0	14.0	0.0	0.0	0.0	0.0	0.0	0.0	0.0	0.0	0.0	0.0	0.0	0.0	0.0	19.0	0.0	0.0	0.0	0.0	0.0
OTU 1458	0.0	0.0	0.0	53.0	0.0	0.0	0.0	0.0	0.0	0.0	0.0	0.0	0.0	0.0	0.0	0.0	0.0	0.0	0.0	0.0	0.0	0.0	0.0	0.0	0.0	0.0	0.0	0.0	0.0	0.0	0.0
OTU 1459	0.0	0.0	0.0	26.0	0.0	0.0	0.0	0.0	0.0	0.0	0.0	0.0	0.0	0.0	8.0	0.0	0.0	0.0	19.0	0.0	0.0	0.0	0.0	0.0	0.0	0.0	0.0	0.0	0.0	0.0	0.0
OTU 1460	0.0	0.0	0.0	15.0	0.0	0.0	0.0	20.0	0.0	0.0	0.0	0.0	0.0	0.0	0.0	0.0	0.0	0.0	0.0	0.0	0.0	18.0	0.0	0.0	0.0	0.0	0.0	0.0	0.0	0.0	0.0
OTU 1461	0.0	0.0	0.0	0.0	0.0	53.0	0.0	0.0	0.0	0.0	0.0	0.0	0.0	0.0	0.0	0.0	0.0	0.0	0.0	0.0	0.0	0.0	0.0	0.0	0.0	0.0	0.0	0.0	0.0	0.0	0.0
OTU 1462	0.0	0.0	0.0	0.0	0.0	53.0	0.0	0.0	0.0	0.0	0.0	0.0	0.0	0.0	0.0	0.0	0.0	0.0	0.0	0.0	0.0	0.0	0.0	0.0	0.0	0.0	0.0	0.0	0.0	0.0	0.0
OTU 1463	0.0	0.0	0.0	0.0	0.0	0.0	46.0	0.0	0.0	0.0	0.0	0.0	0.0	0.0	0.0	0.0	0.0	0.0	0.0	0.0	0.0	0.0	0.0	0.0	0.0	0.0	0.0	0.0	0.0	0.0	7.0
OTU 1464	0.0	0.0	0.0	0.0	0.0	0.0	0.0	0.0	0.0	0.0	0.0	53.0	0.0	0.0	0.0	0.0	0.0	0.0	0.0	0.0	0.0	0.0	0.0	0.0	0.0	0.0	0.0	0.0	0.0	0.0	0.0
OTU 1465	0.0	0.0	0.0	0.0	0.0	0.0	0.0	0.0	0.0	0.0	0.0	0.0	0.0	53.0	0.0	0.0	0.0	0.0	0.0	0.0	0.0	0.0	0.0	0.0	0.0	0.0	0.0	0.0	0.0	0.0	0.0
OTU 1466	0.0	0.0	0.0	0.0	0.0	0.0	0.0	0.0	0.0	0.0	0.0	0.0	0.0	53.0	0.0	0.0	0.0	0.0	0.0	0.0	0.0	0.0	0.0	0.0	0.0	0.0	0.0	0.0	0.0	0.0	0.0
OTU 1467	0.0	0.0	0.0	0.0	0.0	0.0	0.0	0.0	0.0	0.0	0.0	0.0	0.0	0.0	0.0	53.0	0.0	0.0	0.0	0.0	0.0	0.0	0.0	0.0	0.0	0.0	0.0	0.0	0.0	0.0	0.0
OTU 1468	0.0	0.0	0.0	0.0	0.0	0.0	0.0	0.0	0.0	0.0	0.0	0.0	0.0	0.0	0.0	0.0	0.0	53.0	0.0	0.0	0.0	0.0	0.0	0.0	0.0	0.0	0.0	0.0	0.0	0.0	0.0
OTU 1469	0.0	0.0	0.0	0.0	0.0	0.0	0.0	0.0	0.0	0.0	0.0	0.0	0.0	0.0	0.0	0.0	0.0	0.0	0.0	0.0	53.0	0.0	0.0	0.0	0.0	0.0	0.0	0.0	0.0	0.0	0.0
OTU 1470	0.0	0.0	0.0	0.0	0.0	0.0	0.0	0.0	0.0	0.0	0.0	0.0	0.0	0.0	0.0	0.0	0.0	0.0	0.0	0.0	53.0	0.0	0.0	0.0	0.0	0.0	0.0	0.0	0.0	0.0	0.0
OTU 1471	0.0	0.0	0.0	0.0	0.0	0.0	0.0	0.0	0.0	0.0	0.0	0.0	0.0	0.0	0.0	0.0	0.0	0.0	0.0	0.0	0.0	0.0	0.0	53.0	0.0	0.0	0.0	0.0	0.0	0.0	0.0
OTU 1472	0.0	0.0	0.0	0.0	0.0	0.0	0.0	0.0	0.0	0.0	0.0	0.0	0.0	0.0	0.0	0.0	0.0	0.0	0.0	0.0	0.0	0.0	0.0	53.0	0.0	0.0	0.0	0.0	0.0	0.0	0.0
OTU 1473	0.0	0.0	0.0	0.0	0.0	0.0	0.0	0.0	0.0	0.0	0.0	0.0	0.0	0.0	0.0	0.0	0.0	0.0	0.0	0.0	0.0	0.0	0.0	0.0	53.0	0.0	0.0	0.0	0.0	0.0	0.0
OTU 1474	0.0	0.0	0.0	0.0	0.0	0.0	0.0	0.0	0.0	0.0	0.0	0.0	0.0	0.0	0.0	0.0	0.0	0.0	0.0	0.0	0.0	0.0	0.0	0.0	53.0	0.0	0.0	0.0	0.0	0.0	0.0
OTU 1475	0.0	0.0	0.0	0.0	0.0	0.0	0.0	0.0	0.0	0.0	0.0	0.0	0.0	0.0	0.0	0.0	0.0	0.0	0.0	0.0	0.0	0.0	0.0	0.0	53.0	0.0	0.0	0.0	0.0	0.0	0.0
OTU 1476	0.0	0.0	0.0	0.0	0.0	0.0	0.0	0.0	0.0	0.0	0.0	0.0	0.0	0.0	0.0	0.0	0.0	0.0	0.0	0.0	0.0	0.0	0.0	0.0	0.0	53.0	0.0	0.0	0.0	0.0	0.0
OTU 1477	0.0	0.0	0.0	0.0	0.0	0.0	0.0	0.0	0.0	0.0	0.0	0.0	0.0	0.0	0.0	0.0	0.0	0.0	0.0	0.0	0.0	0.0	0.0	0.0	0.0	0.0	53.0	0.0	0.0	0.0	0.0
OTU 1478	52.0	0.0	0.0	0.0	0.0	0.0	0.0	0.0	0.0	0.0	0.0	0.0	0.0	0.0	0.0	0.0	0.0	0.0	0.0	0.0	0.0	0.0	0.0	0.0	0.0	0.0	0.0	0.0	0.0	0.0	0.0
OTU 1479	30.0	0.0	0.0	0.0	0.0	0.0	0.0	0.0	0.0	0.0	0.0	0.0	0.0	0.0	0.0	0.0	0.0	0.0	0.0	0.0	0.0	0.0	0.0	0.0	0.0	0.0	0.0	22.0	0.0	0.0	0.0
OTU 1480	0.0	52.0	0.0	0.0	0.0	0.0	0.0	0.0	0.0	0.0	0.0	0.0	0.0	0.0	0.0	0.0	0.0	0.0	0.0	0.0	0.0	0.0	0.0	0.0	0.0	0.0	0.0	0.0	0.0	0.0	0.0
OTU 1481	0.0	52.0	0.0	0.0	0.0	0.0	0.0	0.0	0.0	0.0	0.0	0.0	0.0	0.0	0.0	0.0	0.0	0.0	0.0	0.0	0.0	0.0	0.0	0.0	0.0	0.0	0.0	0.0	0.0	0.0	0.0
OTU 1482	0.0	10.0	0.0	0.0	0.0	0.0	0.0	0.0	0.0	0.0	0.0	0.0	0.0	0.0	0.0	0.0	0.0	0.0	0.0	0.0	0.0	0.0	0.0	0.0	42.0	0.0	0.0	0.0	0.0	0.0	0.0
OTU 1483	0.0	0.0	0.0	0.0	52.0	0.0	0.0	0.0	0.0	0.0	0.0	0.0	0.0	0.0	0.0	0.0	0.0	0.0	0.0	0.0	0.0	0.0	0.0	0.0	0.0	0.0	0.0	0.0	0.0	0.0	0.0
OTU 1484	0.0	0.0	0.0	0.0	52.0	0.0	0.0	0.0	0.0	0.0	0.0	0.0	0.0	0.0	0.0	0.0	0.0	0.0	0.0	0.0	0.0	0.0	0.0	0.0	0.0	0.0	0.0	0.0	0.0	0.0	0.0
OTU 1485	0.0	0.0	0.0	0.0	21.0	0.0	0.0	0.0	0.0	0.0	0.0	0.0	0.0	0.0	0.0	0.0	0.0	0.0	0.0	0.0	0.0	20.0	0.0	0.0	0.0	0.0	11.0	0.0	0.0	0.0	0.0
OTU 1486	0.0	0.0	0.0	0.0	12.0	0.0	0.0	0.0	0.0	0.0	0.0	0.0	0.0	0.0	20.0	0.0	0.0	0.0	0.0	0.0	0.0	0.0	0.0	0.0	0.0	0.0	0.0	0.0	0.0	20.0	0.0
OTU 1487	0.0	0.0	0.0	0.0	0.0	0.0	0.0	0.0	52.0	0.0	0.0	0.0	0.0	0.0	0.0	0.0	0.0	0.0	0.0	0.0	0.0	0.0	0.0	0.0	0.0	0.0	0.0	0.0	0.0	0.0	0.0
OTU 1488	0.0	0.0	0.0	0.0	0.0	0.0	0.0	0.0	52.0	0.0	0.0	0.0	0.0	0.0	0.0	0.0	0.0	0.0	0.0	0.0	0.0	0.0	0.0	0.0	0.0	0.0	0.0	0.0	0.0	0.0	0.0
OTU 1489	0.0	0.0	0.0	0.0	0.0	0.0	0.0	0.0	0.0	52.0	0.0	0.0	0.0	0.0	0.0	0.0	0.0	0.0	0.0	0.0	0.0	0.0	0.0	0.0	0.0	0.0	0.0	0.0	0.0	0.0	0.0
OTU 1490	0.0	0.0	0.0	0.0	0.0	0.0	0.0	0.0	0.0	52.0	0.0	0.0	0.0	0.0	0.0	0.0	0.0	0.0	0.0	0.0	0.0	0.0	0.0	0.0	0.0	0.0	0.0	0.0	0.0	0.0	0.0
OTU 1491	0.0	0.0	0.0	0.0	0.0	0.0	0.0	0.0	0.0	52.0	0.0	0.0	0.0	0.0	0.0	0.0	0.0	0.0	0.0	0.0	0.0	0.0	0.0	0.0	0.0	0.0	0.0	0.0	0.0	0.0	0.0
OTU 1492	0.0	0.0	0.0	0.0	0.0	0.0	0.0	0.0	0.0	0.0	52.0	0.0	0.0	0.0	0.0	0.0	0.0	0.0	0.0	0.0	0.0	0.0	0.0	0.0	0.0	0.0	0.0	0.0	0.0	0.0	0.0
OTU 1493	0.0	0.0	0.0	0.0	0.0	0.0	0.0	0.0	0.0	0.0	0.0	52.0	0.0	0.0	0.0	0.0	0.0	0.0	0.0	0.0	0.0	0.0	0.0	0.0	0.0	0.0	0.0	0.0	0.0	0.0	0.0
OTU 1494	0.0	0.0	0.0	0.0	0.0	0.0	0.0	0.0	0.0	0.0	0.0	0.0	0.0	52.0	0.0	0.0	0.0	0.0	0.0	0.0	0.0	0.0	0.0	0.0	0.0	0.0	0.0	0.0	0.0	0.0	0.0
OTU 1495	0.0	0.0	0.0	0.0	0.0	0.0	0.0	0.0	0.0	0.0	0.0	0.0	0.0	0.0	52.0	0.0	0.0	0.0	0.0	0.0	0.0	0.0	0.0	0.0	0.0	0.0	0.0	0.0	0.0	0.0	0.0
OTU 1496	0.0	0.0	0.0	0.0	0.0	0.0	0.0	0.0	0.0	0.0	0.0	0.0	0.0	0.0	0.0	52.0	0.0	0.0	0.0	0.0	0.0	0.0	0.0	0.0	0.0	0.0	0.0	0.0	0.0	0.0	0.0
OTU 1497	0.0	0.0	0.0	0.0	0.0	0.0	0.0	0.0	0.0	0.0	0.0	0.0	0.0	0.0	0.0	0.0	0.0	0.0	0.0	0.0	52.0	0.0	0.0	0.0	0.0	0.0	0.0	0.0	0.0	0.0	0.0
OTU 1498	0.0	0.0	0.0	0.0	0.0	0.0	0.0	0.0	0.0	0.0	0.0	0.0	0.0	0.0	0.0	0.0	0.0	0.0	0.0	0.0	0.0	52.0	0.0	0.0	0.0	0.0	0.0	0.0	0.0	0.0	0.0
OTU 1499	0.0	51.0	0.0	0.0	0.0	0.0	0.0	0.0	0.0	0.0	0.0	0.0	0.0	0.0	0.0	0.0	0.0	0.0	0.0	0.0	0.0	0.0	0.0	0.0	0.0	0.0	0.0	0.0	0.0	0.0	0.0
OTU 1500	0.0	0.0	0.0	0.0	51.0	0.0	0.0	0.0	0.0	0.0	0.0	0.0	0.0	0.0	0.0	0.0	0.0	0.0	0.0	0.0	0.0	0.0	0.0	0.0	0.0	0.0	0.0	0.0	0.0	0.0	0.0
OTU 1501	0.0	0.0	0.0	0.0	0.0	0.0	0.0	51.0	0.0	0.0	0.0	0.0	0.0	0.0	0.0	0.0	0.0	0.0	0.0	0.0	0.0	0.0	0.0	0.0	0.0	0.0	0.0	0.0	0.0	0.0	0.0
OTU 1502	0.0	0.0	0.0	0.0	0.0	0.0	0.0	0.0	22.0	0.0	0.0	29.0	0.0	0.0	0.0	0.0	0.0	0.0	0.0	0.0	0.0	0.0	0.0	0.0	0.0	0.0	0.0	0.0	0.0	0.0	0.0
OTU 1503	0.0	0.0	0.0	0.0	0.0	0.0	0.0	0.0	0.0	0.0	51.0	0.0	0.0	0.0	0.0	0.0	0.0	0.0	0.0	0.0	0.0	0.0	0.0	0.0	0.0	0.0	0.0	0.0	0.0	0.0	0.0
OTU 1504	0.0	0.0	0.0	0.0	0.0	0.0	0.0	0.0	0.0	0.0	51.0	0.0	0.0	0.0	0.0	0.0	0.0	0.0	0.0	0.0	0.0	0.0	0.0	0.0	0.0	0.0	0.0	0.0	0.0	0.0	0.0
OTU 1505	0.0	0.0	0.0	0.0	0.0	0.0	0.0	0.0	0.0	0.0	51.0	0.0	0.0	0.0	0.0	0.0	0.0	0.0	0.0	0.0	0.0	0.0	0.0	0.0	0.0	0.0	0.0	0.0	0.0	0.0	0.0
OTU 1506	0.0	0.0	0.0	0.0	0.0	0.0	0.0	0.0	0.0	0.0	0.0	51.0	0.0	0.0	0.0	0.0	0.0	0.0	0.0	0.0	0.0	0.0	0.0	0.0	0.0	0.0	0.0	0.0	0.0	0.0	0.0
OTU 1507	0.0	0.0	0.0	0.0	0.0	0.0	0.0	0.0	0.0	0.0	0.0	0.0	0.0	51.0	0.0	0.0	0.0	0.0	0.0	0.0	0.0	0.0	0.0	0.0	0.0	0.0	0.0	0.0	0.0	0.0	0.0
OTU 1508	0.0	0.0	0.0	0.0	0.0	0.0	0.0	0.0	0.0	0.0	0.0	0.0	0.0	0.0	0.0	19.0	0.0	0.0	32.0	0.0	0.0	0.0	0.0	0.0	0.0	0.0	0.0	0.0	0.0	0.0	0.0
OTU 1509	0.0	0.0	0.0	0.0	0.0	0.0	0.0	0.0	0.0	0.0	0.0	0.0	0.0	0.0	0.0	0.0	0.0	0.0	0.0	0.0	51.0	0.0	0.0	0.0	0.0	0.0	0.0	0.0	0.0	0.0	0.0
OTU 1510	0.0	0.0	0.0	0.0	0.0	0.0	0.0	0.0	0.0	0.0	0.0	0.0	0.0	0.0	0.0	0.0	0.0	0.0	0.0	0.0	51.0	0.0	0.0	0.0	0.0	0.0	0.0	0.0	0.0	0.0	0.0
OTU 1511	0.0	0.0	0.0	0.0	0.0	0.0	0.0	0.0	0.0	0.0	0.0	0.0	0.0	0.0	0.0	0.0	0.0	0.0	0.0	0.0	0.0	51.0	0.0	0.0	0.0	0.0	0.0	0.0	0.0	0.0	0.0
OTU 1512	0.0	0.0	0.0	0.0	0.0	0.0	0.0	0.0	0.0	0.0	0.0	0.0	0.0	0.0	0.0	0.0	0.0	0.0	0.0	0.0	0.0	0.0	51.0	0.0	0.0	0.0	0.0	0.0	0.0	0.0	0.0
OTU 1513	0.0	0.0	0.0	0.0	0.0	0.0	0.0	0.0	0.0	0.0	0.0	0.0	0.0	0.0	0.0	0.0	0.0	0.0	0.0	0.0	0.0	0.0	0.0	51.0	0.0	0.0	0.0	0.0	0.0	0.0	0.0
OTU 1514	0.0	0.0	0.0	0.0	0.0	0.0	0.0	0.0	0.0	0.0	0.0	0.0	0.0	0.0	0.0	0.0	0.0	0.0	0.0	0.0	0.0	0.0	0.0	51.0	0.0	0.0	0.0	0.0	0.0	0.0	0.0
OTU 1515	0.0	0.0	0.0	0.0	0.0	0.0	0.0	0.0	0.0	0.0	0.0	0.0	0.0	0.0	0.0	0.0	0.0	0.0	0.0	0.0	0.0	0.0	0.0	0.0	0.0	0.0	0.0	0.0	0.0	51.0	0.0
OTU 1516	0.0	0.0	0.0	0.0	50.0	0.0	0.0	0.0	0.0	0.0	0.0	0.0	0.0	0.0	0.0	0.0	0.0	0.0	0.0	0.0	0.0	0.0	0.0	0.0	0.0	0.0	0.0	0.0	0.0	0.0	0.0
OTU 1517	0.0	0.0	0.0	0.0	50.0	0.0	0.0	0.0	0.0	0.0	0.0	0.0	0.0	0.0	0.0	0.0	0.0	0.0	0.0	0.0	0.0	0.0	0.0	0.0	0.0	0.0	0.0	0.0	0.0	0.0	0.0
OTU 1518	0.0	0.0	0.0	0.0	50.0	0.0	0.0	0.0	0.0	0.0	0.0	0.0	0.0	0.0	0.0	0.0	0.0	0.0	0.0	0.0	0.0	0.0	0.0	0.0	0.0	0.0	0.0	0.0	0.0	0.0	0.0
OTU 1519	0.0	0.0	0.0	0.0	50.0	0.0	0.0	0.0	0.0	0.0	0.0	0.0	0.0	0.0	0.0	0.0	0.0	0.0	0.0	0.0	0.0	0.0	0.0	0.0	0.0	0.0	0.0	0.0	0.0	0.0	0.0
OTU 1520	0.0	0.0	0.0	0.0	0.0	0.0	0.0	50.0	0.0	0.0	0.0	0.0	0.0	0.0	0.0	0.0	0.0	0.0	0.0	0.0	0.0	0.0	0.0	0.0	0.0	0.0	0.0	0.0	0.0	0.0	0.0
OTU 1521	0.0	0.0	0.0	0.0	0.0	0.0	0.0	0.0	0.0	0.0	50.0	0.0	0.0	0.0	0.0	0.0	0.0	0.0	0.0	0.0	0.0	0.0	0.0	0.0	0.0	0.0	0.0	0.0	0.0	0.0	0.0
OTU 1522	0.0	0.0	0.0	0.0	0.0	0.0	0.0	0.0	0.0	0.0	0.0	50.0	0.0	0.0	0.0	0.0	0.0	0.0	0.0	0.0	0.0	0.0	0.0	0.0	0.0	0.0	0.0	0.0	0.0	0.0	0.0
OTU 1523	0.0	0.0	0.0	0.0	0.0	0.0	0.0	0.0	0.0	0.0	0.0	0.0	0.0	50.0	0.0	0.0	0.0	0.0	0.0	0.0	0.0	0.0	0.0	0.0	0.0	0.0	0.0	0.0	0.0	0.0	0.0
OTU 1524	0.0	0.0	0.0	0.0	0.0	0.0	0.0	0.0	0.0	0.0	0.0	0.0	0.0	0.0	0.0	50.0	0.0	0.0	0.0	0.0	0.0	0.0	0.0	0.0	0.0	0.0	0.0	0.0	0.0	0.0	0.0
OTU 1525	0.0	0.0	0.0	0.0	0.0	0.0	0.0	0.0	0.0	0.0	0.0	0.0	0.0	0.0	0.0	0.0	0.0	0.0	0.0	0.0	50.0	0.0	0.0	0.0	0.0	0.0	0.0	0.0	0.0	0.0	0.0
OTU 1526	0.0	0.0	0.0	0.0	0.0	0.0	0.0	0.0	0.0	0.0	0.0	0.0	0.0	0.0	0.0	0.0	0.0	0.0	0.0	0.0	0.0	0.0	0.0	50.0	0.0	0.0	0.0	0.0	0.0	0.0	0.0
OTU 1527	0.0	0.0	0.0	0.0	0.0	0.0	0.0	0.0	0.0	0.0	0.0	0.0	0.0	0.0	0.0	0.0	0.0	0.0	0.0	0.0	0.0	0.0	0.0	0.0	0.0	50.0	0.0	0.0	0.0	0.0	0.0
OTU 1528	0.0	0.0	0.0	0.0	0.0	0.0	0.0	0.0	0.0	0.0	0.0	0.0	0.0	0.0	0.0	0.0	0.0	0.0	0.0	0.0	0.0	0.0	0.0	0.0	0.0	33.0	0.0	17.0	0.0	0.0	0.0
OTU 1529	0.0	0.0	0.0	0.0	0.0	0.0	0.0	0.0	0.0	0.0	0.0	0.0	0.0	0.0	0.0	0.0	0.0	0.0	0.0	0.0	0.0	0.0	0.0	0.0	0.0	0.0	50.0	0.0	0.0	0.0	0.0
OTU 1530	0.0	0.0	0.0	0.0	0.0	0.0	0.0	0.0	0.0	0.0	0.0	0.0	0.0	0.0	0.0	0.0	0.0	0.0	0.0	0.0	0.0	0.0	0.0	0.0	0.0	0.0	0.0	23.0	0.0	0.0	27.0
OTU 1531	0.0	0.0	0.0	0.0	0.0	0.0	0.0	0.0	0.0	0.0	0.0	0.0	0.0	0.0	0.0	0.0	0.0	0.0	0.0	0.0	0.0	0.0	0.0	0.0	0.0	0.0	0.0	0.0	0.0	0.0	50.0
OTU 1532	49.0	0.0	0.0	0.0	0.0	0.0	0.0	0.0	0.0	0.0	0.0	0.0	0.0	0.0	0.0	0.0	0.0	0.0	0.0	0.0	0.0	0.0	0.0	0.0	0.0	0.0	0.0	0.0	0.0	0.0	0.0
OTU 1533	13.0	0.0	0.0	0.0	0.0	0.0	0.0	0.0	0.0	0.0	0.0	0.0	0.0	0.0	0.0	0.0	0.0	0.0	0.0	0.0	0.0	0.0	0.0	0.0	0.0	0.0	0.0	0.0	36.0	0.0	0.0
OTU 1534	0.0	0.0	0.0	49.0	0.0	0.0	0.0	0.0	0.0	0.0	0.0	0.0	0.0	0.0	0.0	0.0	0.0	0.0	0.0	0.0	0.0	0.0	0.0	0.0	0.0	0.0	0.0	0.0	0.0	0.0	0.0
OTU 1535	0.0	0.0	0.0	49.0	0.0	0.0	0.0	0.0	0.0	0.0	0.0	0.0	0.0	0.0	0.0	0.0	0.0	0.0	0.0	0.0	0.0	0.0	0.0	0.0	0.0	0.0	0.0	0.0	0.0	0.0	0.0
OTU 1536	0.0	0.0	0.0	0.0	49.0	0.0	0.0	0.0	0.0	0.0	0.0	0.0	0.0	0.0	0.0	0.0	0.0	0.0	0.0	0.0	0.0	0.0	0.0	0.0	0.0	0.0	0.0	0.0	0.0	0.0	0.0
OTU 1537	0.0	0.0	0.0	0.0	49.0	0.0	0.0	0.0	0.0	0.0	0.0	0.0	0.0	0.0	0.0	0.0	0.0	0.0	0.0	0.0	0.0	0.0	0.0	0.0	0.0	0.0	0.0	0.0	0.0	0.0	0.0
OTU 1538	0.0	0.0	0.0	0.0	10.0	0.0	0.0	0.0	9.0	0.0	0.0	14.0	0.0	0.0	0.0	10.0	0.0	0.0	0.0	0.0	0.0	0.0	0.0	6.0	0.0	0.0	0.0	0.0	0.0	0.0	0.0
OTU 1539	0.0	0.0	0.0	0.0	4.0	0.0	0.0	0.0	6.0	0.0	0.0	19.0	0.0	0.0	0.0	0.0	0.0	0.0	0.0	0.0	0.0	13.0	0.0	7.0	0.0	0.0	0.0	0.0	0.0	0.0	0.0
OTU 1540	0.0	0.0	0.0	0.0	0.0	0.0	49.0	0.0	0.0	0.0	0.0	0.0	0.0	0.0	0.0	0.0	0.0	0.0	0.0	0.0	0.0	0.0	0.0	0.0	0.0	0.0	0.0	0.0	0.0	0.0	0.0
OTU 1541	0.0	0.0	0.0	0.0	0.0	0.0	0.0	0.0	0.0	0.0	49.0	0.0	0.0	0.0	0.0	0.0	0.0	0.0	0.0	0.0	0.0	0.0	0.0	0.0	0.0	0.0	0.0	0.0	0.0	0.0	0.0
OTU 1542	0.0	0.0	0.0	0.0	0.0	0.0	0.0	0.0	0.0	0.0	49.0	0.0	0.0	0.0	0.0	0.0	0.0	0.0	0.0	0.0	0.0	0.0	0.0	0.0	0.0	0.0	0.0	0.0	0.0	0.0	0.0
OTU 1543	0.0	0.0	0.0	0.0	0.0	0.0	0.0	0.0	0.0	0.0	0.0	49.0	0.0	0.0	0.0	0.0	0.0	0.0	0.0	0.0	0.0	0.0	0.0	0.0	0.0	0.0	0.0	0.0	0.0	0.0	0.0
OTU 1544	0.0	0.0	0.0	0.0	0.0	0.0	0.0	0.0	0.0	0.0	0.0	49.0	0.0	0.0	0.0	0.0	0.0	0.0	0.0	0.0	0.0	0.0	0.0	0.0	0.0	0.0	0.0	0.0	0.0	0.0	0.0
OTU 1545	0.0	0.0	0.0	0.0	0.0	0.0	0.0	0.0	0.0	0.0	0.0	0.0	49.0	0.0	0.0	0.0	0.0	0.0	0.0	0.0	0.0	0.0	0.0	0.0	0.0	0.0	0.0	0.0	0.0	0.0	0.0
OTU 1546	0.0	0.0	0.0	0.0	0.0	0.0	0.0	0.0	0.0	0.0	0.0	0.0	49.0	0.0	0.0	0.0	0.0	0.0	0.0	0.0	0.0	0.0	0.0	0.0	0.0	0.0	0.0	0.0	0.0	0.0	0.0
OTU 1547	0.0	0.0	0.0	0.0	0.0	0.0	0.0	0.0	0.0	0.0	0.0	0.0	0.0	0.0	49.0	0.0	0.0	0.0	0.0	0.0	0.0	0.0	0.0	0.0	0.0	0.0	0.0	0.0	0.0	0.0	0.0
OTU 1548	0.0	0.0	0.0	0.0	0.0	0.0	0.0	0.0	0.0	0.0	0.0	0.0	0.0	0.0	49.0	0.0	0.0	0.0	0.0	0.0	0.0	0.0	0.0	0.0	0.0	0.0	0.0	0.0	0.0	0.0	0.0
OTU 1549	0.0	0.0	0.0	0.0	0.0	0.0	0.0	0.0	0.0	0.0	0.0	0.0	0.0	0.0	0.0	49.0	0.0	0.0	0.0	0.0	0.0	0.0	0.0	0.0	0.0	0.0	0.0	0.0	0.0	0.0	0.0
OTU 1550	0.0	0.0	0.0	0.0	0.0	0.0	0.0	0.0	0.0	0.0	0.0	0.0	0.0	0.0	0.0	0.0	0.0	0.0	49.0	0.0	0.0	0.0	0.0	0.0	0.0	0.0	0.0	0.0	0.0	0.0	0.0
OTU 1551	0.0	0.0	0.0	0.0	0.0	0.0	0.0	0.0	0.0	0.0	0.0	0.0	0.0	0.0	0.0	0.0	0.0	0.0	0.0	0.0	49.0	0.0	0.0	0.0	0.0	0.0	0.0	0.0	0.0	0.0	0.0
OTU 1552	0.0	0.0	0.0	0.0	0.0	0.0	0.0	0.0	0.0	0.0	0.0	0.0	0.0	0.0	0.0	0.0	0.0	0.0	0.0	0.0	0.0	49.0	0.0	0.0	0.0	0.0	0.0	0.0	0.0	0.0	0.0
OTU 1553	0.0	0.0	0.0	0.0	0.0	0.0	0.0	0.0	0.0	0.0	0.0	0.0	0.0	0.0	0.0	0.0	0.0	0.0	0.0	0.0	0.0	0.0	0.0	0.0	0.0	0.0	49.0	0.0	0.0	0.0	0.0
OTU 1554	0.0	0.0	0.0	0.0	0.0	0.0	0.0	0.0	0.0	0.0	0.0	0.0	0.0	0.0	0.0	0.0	0.0	0.0	0.0	0.0	0.0	0.0	0.0	0.0	0.0	0.0	0.0	49.0	0.0	0.0	0.0
OTU 1555	0.0	0.0	0.0	0.0	0.0	0.0	0.0	0.0	0.0	0.0	0.0	0.0	0.0	0.0	0.0	0.0	0.0	0.0	0.0	0.0	0.0	0.0	0.0	0.0	0.0	0.0	0.0	49.0	0.0	0.0	0.0
OTU 1556	0.0	0.0	0.0	0.0	0.0	0.0	0.0	0.0	0.0	0.0	0.0	0.0	0.0	0.0	0.0	0.0	0.0	0.0	0.0	0.0	0.0	0.0	0.0	0.0	0.0	0.0	0.0	0.0	0.0	0.0	49.0
OTU 1557	0.0	0.0	0.0	2.0	12.0	0.0	0.0	0.0	0.0	0.0	0.0	0.0	0.0	0.0	0.0	0.0	0.0	0.0	0.0	0.0	0.0	0.0	14.0	0.0	0.0	7.0	0.0	0.0	0.0	13.0	0.0
OTU 1558	0.0	0.0	0.0	0.0	48.0	0.0	0.0	0.0	0.0	0.0	0.0	0.0	0.0	0.0	0.0	0.0	0.0	0.0	0.0	0.0	0.0	0.0	0.0	0.0	0.0	0.0	0.0	0.0	0.0	0.0	0.0
OTU 1559	0.0	0.0	0.0	0.0	48.0	0.0	0.0	0.0	0.0	0.0	0.0	0.0	0.0	0.0	0.0	0.0	0.0	0.0	0.0	0.0	0.0	0.0	0.0	0.0	0.0	0.0	0.0	0.0	0.0	0.0	0.0
OTU 1560	0.0	0.0	0.0	0.0	19.0	0.0	29.0	0.0	0.0	0.0	0.0	0.0	0.0	0.0	0.0	0.0	0.0	0.0	0.0	0.0	0.0	0.0	0.0	0.0	0.0	0.0	0.0	0.0	0.0	0.0	0.0
OTU 1561	0.0	0.0	0.0	0.0	0.0	8.0	0.0	0.0	19.0	0.0	0.0	0.0	0.0	0.0	0.0	10.0	0.0	0.0	0.0	0.0	0.0	0.0	0.0	3.0	2.0	0.0	0.0	0.0	0.0	6.0	0.0
OTU 1562	0.0	0.0	0.0	0.0	0.0	0.0	48.0	0.0	0.0	0.0	0.0	0.0	0.0	0.0	0.0	0.0	0.0	0.0	0.0	0.0	0.0	0.0	0.0	0.0	0.0	0.0	0.0	0.0	0.0	0.0	0.0
OTU 1563	0.0	0.0	0.0	0.0	0.0	0.0	13.0	0.0	0.0	0.0	0.0	0.0	0.0	0.0	0.0	0.0	0.0	0.0	0.0	0.0	0.0	35.0	0.0	0.0	0.0	0.0	0.0	0.0	0.0	0.0	0.0
OTU 1564	0.0	0.0	0.0	0.0	0.0	0.0	0.0	48.0	0.0	0.0	0.0	0.0	0.0	0.0	0.0	0.0	0.0	0.0	0.0	0.0	0.0	0.0	0.0	0.0	0.0	0.0	0.0	0.0	0.0	0.0	0.0
OTU 1565	0.0	0.0	0.0	0.0	0.0	0.0	0.0	0.0	0.0	0.0	0.0	0.0	0.0	48.0	0.0	0.0	0.0	0.0	0.0	0.0	0.0	0.0	0.0	0.0	0.0	0.0	0.0	0.0	0.0	0.0	0.0
OTU 1566	0.0	0.0	0.0	0.0	0.0	0.0	0.0	0.0	0.0	0.0	0.0	0.0	0.0	0.0	48.0	0.0	0.0	0.0	0.0	0.0	0.0	0.0	0.0	0.0	0.0	0.0	0.0	0.0	0.0	0.0	0.0
OTU 1567	0.0	0.0	0.0	0.0	0.0	0.0	0.0	0.0	0.0	0.0	0.0	0.0	0.0	0.0	48.0	0.0	0.0	0.0	0.0	0.0	0.0	0.0	0.0	0.0	0.0	0.0	0.0	0.0	0.0	0.0	0.0
OTU 1568	0.0	0.0	0.0	0.0	0.0	0.0	0.0	0.0	0.0	0.0	0.0	0.0	0.0	0.0	0.0	0.0	0.0	0.0	30.0	0.0	0.0	0.0	0.0	0.0	0.0	0.0	0.0	0.0	0.0	18.0	0.0
OTU 1569	0.0	0.0	0.0	0.0	0.0	0.0	0.0	0.0	0.0	0.0	0.0	0.0	0.0	0.0	0.0	0.0	0.0	0.0	0.0	0.0	0.0	0.0	0.0	0.0	48.0	0.0	0.0	0.0	0.0	0.0	0.0
OTU 1570	0.0	0.0	0.0	0.0	0.0	0.0	0.0	0.0	0.0	0.0	0.0	0.0	0.0	0.0	0.0	0.0	0.0	0.0	0.0	0.0	0.0	0.0	0.0	0.0	48.0	0.0	0.0	0.0	0.0	0.0	0.0
OTU 1571	0.0	0.0	0.0	0.0	0.0	0.0	0.0	0.0	0.0	0.0	0.0	0.0	0.0	0.0	0.0	0.0	0.0	0.0	0.0	0.0	0.0	0.0	0.0	0.0	0.0	0.0	13.0	0.0	0.0	35.0	0.0
OTU 1572	0.0	0.0	0.0	0.0	0.0	0.0	0.0	0.0	0.0	0.0	0.0	0.0	0.0	0.0	0.0	0.0	0.0	0.0	0.0	0.0	0.0	0.0	0.0	0.0	0.0	0.0	0.0	48.0	0.0	0.0	0.0
OTU 1573	0.0	0.0	0.0	0.0	0.0	0.0	0.0	0.0	0.0	0.0	0.0	0.0	0.0	0.0	0.0	0.0	0.0	0.0	0.0	0.0	0.0	0.0	0.0	0.0	0.0	0.0	0.0	0.0	0.0	48.0	0.0
OTU 1574	0.0	0.0	0.0	0.0	0.0	0.0	0.0	0.0	0.0	0.0	0.0	0.0	0.0	0.0	0.0	0.0	0.0	0.0	0.0	0.0	0.0	0.0	0.0	0.0	0.0	0.0	0.0	0.0	0.0	48.0	0.0
OTU 1575	0.0	0.0	0.0	0.0	0.0	0.0	0.0	0.0	0.0	0.0	0.0	0.0	0.0	0.0	0.0	0.0	0.0	0.0	0.0	0.0	0.0	0.0	0.0	0.0	0.0	0.0	0.0	0.0	0.0	0.0	48.0
OTU 1576	47.0	0.0	0.0	0.0	0.0	0.0	0.0	0.0	0.0	0.0	0.0	0.0	0.0	0.0	0.0	0.0	0.0	0.0	0.0	0.0	0.0	0.0	0.0	0.0	0.0	0.0	0.0	0.0	0.0	0.0	0.0
OTU 1577	47.0	0.0	0.0	0.0	0.0	0.0	0.0	0.0	0.0	0.0	0.0	0.0	0.0	0.0	0.0	0.0	0.0	0.0	0.0	0.0	0.0	0.0	0.0	0.0	0.0	0.0	0.0	0.0	0.0	0.0	0.0
OTU 1578	28.0	19.0	0.0	0.0	0.0	0.0	0.0	0.0	0.0	0.0	0.0	0.0	0.0	0.0	0.0	0.0	0.0	0.0	0.0	0.0	0.0	0.0	0.0	0.0	0.0	0.0	0.0	0.0	0.0	0.0	0.0
OTU 1579	24.0	0.0	0.0	0.0	11.0	0.0	0.0	0.0	6.0	0.0	0.0	0.0	0.0	3.0	0.0	0.0	0.0	0.0	0.0	0.0	0.0	0.0	0.0	0.0	0.0	0.0	0.0	0.0	0.0	3.0	0.0
OTU 1580	0.0	47.0	0.0	0.0	0.0	0.0	0.0	0.0	0.0	0.0	0.0	0.0	0.0	0.0	0.0	0.0	0.0	0.0	0.0	0.0	0.0	0.0	0.0	0.0	0.0	0.0	0.0	0.0	0.0	0.0	0.0
OTU 1581	0.0	47.0	0.0	0.0	0.0	0.0	0.0	0.0	0.0	0.0	0.0	0.0	0.0	0.0	0.0	0.0	0.0	0.0	0.0	0.0	0.0	0.0	0.0	0.0	0.0	0.0	0.0	0.0	0.0	0.0	0.0
OTU 1582	0.0	0.0	0.0	0.0	39.0	0.0	0.0	0.0	0.0	8.0	0.0	0.0	0.0	0.0	0.0	0.0	0.0	0.0	0.0	0.0	0.0	0.0	0.0	0.0	0.0	0.0	0.0	0.0	0.0	0.0	0.0
OTU 1583	0.0	0.0	0.0	0.0	0.0	0.0	47.0	0.0	0.0	0.0	0.0	0.0	0.0	0.0	0.0	0.0	0.0	0.0	0.0	0.0	0.0	0.0	0.0	0.0	0.0	0.0	0.0	0.0	0.0	0.0	0.0
OTU 1584	0.0	0.0	0.0	0.0	0.0	0.0	21.0	0.0	0.0	0.0	5.0	0.0	0.0	0.0	0.0	0.0	0.0	0.0	0.0	0.0	0.0	0.0	0.0	0.0	0.0	21.0	0.0	0.0	0.0	0.0	0.0
OTU 1585	0.0	0.0	0.0	0.0	0.0	0.0	0.0	47.0	0.0	0.0	0.0	0.0	0.0	0.0	0.0	0.0	0.0	0.0	0.0	0.0	0.0	0.0	0.0	0.0	0.0	0.0	0.0	0.0	0.0	0.0	0.0
OTU 1586	0.0	0.0	0.0	0.0	0.0	0.0	0.0	0.0	47.0	0.0	0.0	0.0	0.0	0.0	0.0	0.0	0.0	0.0	0.0	0.0	0.0	0.0	0.0	0.0	0.0	0.0	0.0	0.0	0.0	0.0	0.0
OTU 1587	0.0	0.0	0.0	0.0	0.0	0.0	0.0	0.0	47.0	0.0	0.0	0.0	0.0	0.0	0.0	0.0	0.0	0.0	0.0	0.0	0.0	0.0	0.0	0.0	0.0	0.0	0.0	0.0	0.0	0.0	0.0
OTU 1588	0.0	0.0	0.0	0.0	0.0	0.0	0.0	0.0	0.0	0.0	0.0	47.0	0.0	0.0	0.0	0.0	0.0	0.0	0.0	0.0	0.0	0.0	0.0	0.0	0.0	0.0	0.0	0.0	0.0	0.0	0.0
OTU 1589	0.0	0.0	0.0	0.0	0.0	0.0	0.0	0.0	0.0	0.0	0.0	0.0	0.0	47.0	0.0	0.0	0.0	0.0	0.0	0.0	0.0	0.0	0.0	0.0	0.0	0.0	0.0	0.0	0.0	0.0	0.0
OTU 1590	0.0	0.0	0.0	0.0	0.0	0.0	0.0	0.0	0.0	0.0	0.0	0.0	0.0	0.0	47.0	0.0	0.0	0.0	0.0	0.0	0.0	0.0	0.0	0.0	0.0	0.0	0.0	0.0	0.0	0.0	0.0
OTU 1591	0.0	0.0	0.0	0.0	0.0	0.0	0.0	0.0	0.0	0.0	0.0	0.0	0.0	0.0	0.0	0.0	0.0	0.0	47.0	0.0	0.0	0.0	0.0	0.0	0.0	0.0	0.0	0.0	0.0	0.0	0.0
OTU 1592	0.0	0.0	0.0	0.0	0.0	0.0	0.0	0.0	0.0	0.0	0.0	0.0	0.0	0.0	0.0	0.0	0.0	0.0	47.0	0.0	0.0	0.0	0.0	0.0	0.0	0.0	0.0	0.0	0.0	0.0	0.0
OTU 1593	0.0	0.0	0.0	0.0	0.0	0.0	0.0	0.0	0.0	0.0	0.0	0.0	0.0	0.0	0.0	0.0	0.0	0.0	0.0	0.0	0.0	47.0	0.0	0.0	0.0	0.0	0.0	0.0	0.0	0.0	0.0
OTU 1594	0.0	0.0	0.0	0.0	0.0	0.0	0.0	0.0	0.0	0.0	0.0	0.0	0.0	0.0	0.0	0.0	0.0	0.0	0.0	0.0	0.0	0.0	47.0	0.0	0.0	0.0	0.0	0.0	0.0	0.0	0.0
OTU 1595	0.0	0.0	0.0	0.0	0.0	0.0	0.0	0.0	0.0	0.0	0.0	0.0	0.0	0.0	0.0	0.0	0.0	0.0	0.0	0.0	0.0	0.0	0.0	47.0	0.0	0.0	0.0	0.0	0.0	0.0	0.0
OTU 1596	0.0	0.0	0.0	0.0	0.0	0.0	0.0	0.0	0.0	0.0	0.0	0.0	0.0	0.0	0.0	0.0	0.0	0.0	0.0	0.0	0.0	0.0	0.0	0.0	47.0	0.0	0.0	0.0	0.0	0.0	0.0
OTU 1597	0.0	0.0	0.0	0.0	0.0	0.0	0.0	0.0	0.0	0.0	0.0	0.0	0.0	0.0	0.0	0.0	0.0	0.0	0.0	0.0	0.0	0.0	0.0	0.0	0.0	0.0	0.0	47.0	0.0	0.0	0.0
OTU 1598	0.0	0.0	0.0	0.0	0.0	0.0	0.0	0.0	0.0	0.0	0.0	0.0	0.0	0.0	0.0	0.0	0.0	0.0	0.0	0.0	0.0	0.0	0.0	0.0	0.0	0.0	0.0	47.0	0.0	0.0	0.0
OTU 1599	0.0	0.0	0.0	0.0	0.0	0.0	0.0	0.0	0.0	0.0	0.0	0.0	0.0	0.0	0.0	0.0	0.0	0.0	0.0	0.0	0.0	0.0	0.0	0.0	0.0	0.0	0.0	0.0	0.0	0.0	47.0
OTU 1600	14.0	0.0	0.0	0.0	17.0	0.0	0.0	0.0	7.0	0.0	0.0	0.0	0.0	3.0	0.0	0.0	0.0	0.0	0.0	0.0	0.0	0.0	0.0	0.0	0.0	0.0	0.0	0.0	0.0	5.0	0.0
OTU 1601	0.0	46.0	0.0	0.0	0.0	0.0	0.0	0.0	0.0	0.0	0.0	0.0	0.0	0.0	0.0	0.0	0.0	0.0	0.0	0.0	0.0	0.0	0.0	0.0	0.0	0.0	0.0	0.0	0.0	0.0	0.0
OTU 1602	0.0	0.0	46.0	0.0	0.0	0.0	0.0	0.0	0.0	0.0	0.0	0.0	0.0	0.0	0.0	0.0	0.0	0.0	0.0	0.0	0.0	0.0	0.0	0.0	0.0	0.0	0.0	0.0	0.0	0.0	0.0
OTU 1603	0.0	0.0	0.0	0.0	0.0	25.0	0.0	0.0	0.0	0.0	0.0	0.0	0.0	0.0	0.0	0.0	0.0	0.0	0.0	0.0	0.0	0.0	0.0	0.0	0.0	0.0	0.0	0.0	21.0	0.0	0.0
OTU 1604	0.0	0.0	0.0	0.0	0.0	0.0	46.0	0.0	0.0	0.0	0.0	0.0	0.0	0.0	0.0	0.0	0.0	0.0	0.0	0.0	0.0	0.0	0.0	0.0	0.0	0.0	0.0	0.0	0.0	0.0	0.0
OTU 1605	0.0	0.0	0.0	0.0	0.0	0.0	0.0	46.0	0.0	0.0	0.0	0.0	0.0	0.0	0.0	0.0	0.0	0.0	0.0	0.0	0.0	0.0	0.0	0.0	0.0	0.0	0.0	0.0	0.0	0.0	0.0
OTU 1606	0.0	0.0	0.0	0.0	0.0	0.0	0.0	0.0	0.0	0.0	46.0	0.0	0.0	0.0	0.0	0.0	0.0	0.0	0.0	0.0	0.0	0.0	0.0	0.0	0.0	0.0	0.0	0.0	0.0	0.0	0.0
OTU 1607	0.0	0.0	0.0	0.0	0.0	0.0	0.0	0.0	0.0	0.0	0.0	46.0	0.0	0.0	0.0	0.0	0.0	0.0	0.0	0.0	0.0	0.0	0.0	0.0	0.0	0.0	0.0	0.0	0.0	0.0	0.0
OTU 1608	0.0	0.0	0.0	0.0	0.0	0.0	0.0	0.0	0.0	0.0	0.0	19.0	0.0	0.0	0.0	0.0	0.0	0.0	0.0	0.0	0.0	0.0	0.0	0.0	0.0	0.0	0.0	27.0	0.0	0.0	0.0
OTU 1609	0.0	0.0	0.0	0.0	0.0	0.0	0.0	0.0	0.0	0.0	0.0	0.0	0.0	0.0	46.0	0.0	0.0	0.0	0.0	0.0	0.0	0.0	0.0	0.0	0.0	0.0	0.0	0.0	0.0	0.0	0.0
OTU 1610	0.0	0.0	0.0	0.0	0.0	0.0	0.0	0.0	0.0	0.0	0.0	0.0	0.0	0.0	0.0	0.0	0.0	0.0	0.0	0.0	46.0	0.0	0.0	0.0	0.0	0.0	0.0	0.0	0.0	0.0	0.0
OTU 1611	0.0	0.0	0.0	0.0	0.0	0.0	0.0	0.0	0.0	0.0	0.0	0.0	0.0	0.0	0.0	0.0	0.0	0.0	0.0	0.0	0.0	0.0	0.0	29.0	0.0	0.0	17.0	0.0	0.0	0.0	0.0
OTU 1612	0.0	0.0	0.0	0.0	0.0	0.0	0.0	0.0	0.0	0.0	0.0	0.0	0.0	0.0	0.0	0.0	0.0	0.0	0.0	0.0	0.0	0.0	0.0	0.0	0.0	46.0	0.0	0.0	0.0	0.0	0.0
OTU 1613	0.0	0.0	0.0	0.0	0.0	0.0	0.0	0.0	0.0	0.0	0.0	0.0	0.0	0.0	0.0	0.0	0.0	0.0	0.0	0.0	0.0	0.0	0.0	0.0	0.0	0.0	0.0	0.0	0.0	46.0	0.0
OTU 1614	45.0	0.0	0.0	0.0	0.0	0.0	0.0	0.0	0.0	0.0	0.0	0.0	0.0	0.0	0.0	0.0	0.0	0.0	0.0	0.0	0.0	0.0	0.0	0.0	0.0	0.0	0.0	0.0	0.0	0.0	0.0
OTU 1615	0.0	45.0	0.0	0.0	0.0	0.0	0.0	0.0	0.0	0.0	0.0	0.0	0.0	0.0	0.0	0.0	0.0	0.0	0.0	0.0	0.0	0.0	0.0	0.0	0.0	0.0	0.0	0.0	0.0	0.0	0.0
OTU 1616	0.0	0.0	0.0	0.0	45.0	0.0	0.0	0.0	0.0	0.0	0.0	0.0	0.0	0.0	0.0	0.0	0.0	0.0	0.0	0.0	0.0	0.0	0.0	0.0	0.0	0.0	0.0	0.0	0.0	0.0	0.0
OTU 1617	0.0	0.0	0.0	0.0	45.0	0.0	0.0	0.0	0.0	0.0	0.0	0.0	0.0	0.0	0.0	0.0	0.0	0.0	0.0	0.0	0.0	0.0	0.0	0.0	0.0	0.0	0.0	0.0	0.0	0.0	0.0
OTU 1618	0.0	0.0	0.0	0.0	45.0	0.0	0.0	0.0	0.0	0.0	0.0	0.0	0.0	0.0	0.0	0.0	0.0	0.0	0.0	0.0	0.0	0.0	0.0	0.0	0.0	0.0	0.0	0.0	0.0	0.0	0.0
OTU 1619	0.0	0.0	0.0	0.0	0.0	0.0	45.0	0.0	0.0	0.0	0.0	0.0	0.0	0.0	0.0	0.0	0.0	0.0	0.0	0.0	0.0	0.0	0.0	0.0	0.0	0.0	0.0	0.0	0.0	0.0	0.0
OTU 1620	0.0	0.0	0.0	0.0	0.0	0.0	0.0	0.0	0.0	0.0	45.0	0.0	0.0	0.0	0.0	0.0	0.0	0.0	0.0	0.0	0.0	0.0	0.0	0.0	0.0	0.0	0.0	0.0	0.0	0.0	0.0
OTU 1621	0.0	0.0	0.0	0.0	0.0	0.0	0.0	0.0	0.0	0.0	0.0	0.0	0.0	45.0	0.0	0.0	0.0	0.0	0.0	0.0	0.0	0.0	0.0	0.0	0.0	0.0	0.0	0.0	0.0	0.0	0.0
OTU 1622	0.0	0.0	0.0	0.0	0.0	0.0	0.0	0.0	0.0	0.0	0.0	0.0	0.0	0.0	45.0	0.0	0.0	0.0	0.0	0.0	0.0	0.0	0.0	0.0	0.0	0.0	0.0	0.0	0.0	0.0	0.0
OTU 1623	0.0	0.0	0.0	0.0	0.0	0.0	0.0	0.0	0.0	0.0	0.0	0.0	0.0	0.0	0.0	0.0	0.0	0.0	0.0	0.0	0.0	45.0	0.0	0.0	0.0	0.0	0.0	0.0	0.0	0.0	0.0
OTU 1624	0.0	0.0	0.0	0.0	0.0	0.0	0.0	0.0	0.0	0.0	0.0	0.0	0.0	0.0	0.0	0.0	0.0	0.0	0.0	0.0	0.0	0.0	0.0	45.0	0.0	0.0	0.0	0.0	0.0	0.0	0.0
OTU 1625	0.0	0.0	0.0	0.0	0.0	0.0	0.0	0.0	0.0	0.0	0.0	0.0	0.0	0.0	0.0	0.0	0.0	0.0	0.0	0.0	0.0	0.0	0.0	0.0	36.0	0.0	0.0	0.0	0.0	0.0	9.0
OTU 1626	0.0	0.0	0.0	0.0	0.0	0.0	0.0	0.0	0.0	0.0	0.0	0.0	0.0	0.0	0.0	0.0	0.0	0.0	0.0	0.0	0.0	0.0	0.0	0.0	0.0	0.0	0.0	0.0	0.0	45.0	0.0
OTU 1627	8.0	0.0	0.0	3.0	0.0	0.0	0.0	0.0	0.0	0.0	0.0	0.0	0.0	0.0	0.0	15.0	0.0	0.0	0.0	0.0	0.0	0.0	0.0	0.0	0.0	0.0	18.0	0.0	0.0	0.0	0.0
OTU 1628	0.0	44.0	0.0	0.0	0.0	0.0	0.0	0.0	0.0	0.0	0.0	0.0	0.0	0.0	0.0	0.0	0.0	0.0	0.0	0.0	0.0	0.0	0.0	0.0	0.0	0.0	0.0	0.0	0.0	0.0	0.0
OTU 1629	0.0	0.0	44.0	0.0	0.0	0.0	0.0	0.0	0.0	0.0	0.0	0.0	0.0	0.0	0.0	0.0	0.0	0.0	0.0	0.0	0.0	0.0	0.0	0.0	0.0	0.0	0.0	0.0	0.0	0.0	0.0
OTU 1630	0.0	0.0	17.0	0.0	0.0	0.0	0.0	0.0	0.0	27.0	0.0	0.0	0.0	0.0	0.0	0.0	0.0	0.0	0.0	0.0	0.0	0.0	0.0	0.0	0.0	0.0	0.0	0.0	0.0	0.0	0.0
OTU 1631	0.0	0.0	0.0	9.0	6.0	0.0	0.0	0.0	0.0	0.0	0.0	0.0	0.0	0.0	0.0	0.0	0.0	0.0	0.0	0.0	0.0	0.0	11.0	0.0	0.0	5.0	0.0	0.0	0.0	13.0	0.0
OTU 1632	0.0	0.0	0.0	0.0	44.0	0.0	0.0	0.0	0.0	0.0	0.0	0.0	0.0	0.0	0.0	0.0	0.0	0.0	0.0	0.0	0.0	0.0	0.0	0.0	0.0	0.0	0.0	0.0	0.0	0.0	0.0
OTU 1633	0.0	0.0	0.0	0.0	0.0	0.0	44.0	0.0	0.0	0.0	0.0	0.0	0.0	0.0	0.0	0.0	0.0	0.0	0.0	0.0	0.0	0.0	0.0	0.0	0.0	0.0	0.0	0.0	0.0	0.0	0.0
OTU 1634	0.0	0.0	0.0	0.0	0.0	0.0	0.0	0.0	44.0	0.0	0.0	0.0	0.0	0.0	0.0	0.0	0.0	0.0	0.0	0.0	0.0	0.0	0.0	0.0	0.0	0.0	0.0	0.0	0.0	0.0	0.0
OTU 1635	0.0	0.0	0.0	0.0	0.0	0.0	0.0	0.0	0.0	44.0	0.0	0.0	0.0	0.0	0.0	0.0	0.0	0.0	0.0	0.0	0.0	0.0	0.0	0.0	0.0	0.0	0.0	0.0	0.0	0.0	0.0
OTU 1636	0.0	0.0	0.0	0.0	0.0	0.0	0.0	0.0	0.0	0.0	44.0	0.0	0.0	0.0	0.0	0.0	0.0	0.0	0.0	0.0	0.0	0.0	0.0	0.0	0.0	0.0	0.0	0.0	0.0	0.0	0.0
OTU 1637	0.0	0.0	0.0	0.0	0.0	0.0	0.0	0.0	0.0	0.0	0.0	0.0	44.0	0.0	0.0	0.0	0.0	0.0	0.0	0.0	0.0	0.0	0.0	0.0	0.0	0.0	0.0	0.0	0.0	0.0	0.0
OTU 1638	0.0	0.0	0.0	0.0	0.0	0.0	0.0	0.0	0.0	0.0	0.0	0.0	0.0	0.0	44.0	0.0	0.0	0.0	0.0	0.0	0.0	0.0	0.0	0.0	0.0	0.0	0.0	0.0	0.0	0.0	0.0
OTU 1639	0.0	0.0	0.0	0.0	0.0	0.0	0.0	0.0	0.0	0.0	0.0	0.0	0.0	0.0	44.0	0.0	0.0	0.0	0.0	0.0	0.0	0.0	0.0	0.0	0.0	0.0	0.0	0.0	0.0	0.0	0.0
OTU 1640	0.0	0.0	0.0	0.0	0.0	0.0	0.0	0.0	0.0	0.0	0.0	0.0	0.0	0.0	0.0	44.0	0.0	0.0	0.0	0.0	0.0	0.0	0.0	0.0	0.0	0.0	0.0	0.0	0.0	0.0	0.0
OTU 1641	0.0	0.0	0.0	0.0	0.0	0.0	0.0	0.0	0.0	0.0	0.0	0.0	0.0	0.0	0.0	0.0	0.0	0.0	44.0	0.0	0.0	0.0	0.0	0.0	0.0	0.0	0.0	0.0	0.0	0.0	0.0
OTU 1642	0.0	0.0	0.0	0.0	0.0	0.0	0.0	0.0	0.0	0.0	0.0	0.0	0.0	0.0	0.0	0.0	0.0	0.0	0.0	44.0	0.0	0.0	0.0	0.0	0.0	0.0	0.0	0.0	0.0	0.0	0.0
OTU 1643	0.0	0.0	0.0	0.0	0.0	0.0	0.0	0.0	0.0	0.0	0.0	0.0	0.0	0.0	0.0	0.0	0.0	0.0	0.0	0.0	0.0	0.0	44.0	0.0	0.0	0.0	0.0	0.0	0.0	0.0	0.0
OTU 1644	0.0	0.0	0.0	0.0	0.0	0.0	0.0	0.0	0.0	0.0	0.0	0.0	0.0	0.0	0.0	0.0	0.0	0.0	0.0	0.0	0.0	0.0	0.0	44.0	0.0	0.0	0.0	0.0	0.0	0.0	0.0
OTU 1645	0.0	0.0	0.0	0.0	0.0	0.0	0.0	0.0	0.0	0.0	0.0	0.0	0.0	0.0	0.0	0.0	0.0	0.0	0.0	0.0	0.0	0.0	0.0	0.0	0.0	0.0	0.0	44.0	0.0	0.0	0.0
OTU 1646	0.0	0.0	0.0	0.0	0.0	0.0	0.0	0.0	0.0	0.0	0.0	0.0	0.0	0.0	0.0	0.0	0.0	0.0	0.0	0.0	0.0	0.0	0.0	0.0	0.0	0.0	0.0	0.0	0.0	44.0	0.0
OTU 1647	0.0	0.0	0.0	0.0	0.0	0.0	0.0	0.0	0.0	0.0	0.0	0.0	0.0	0.0	0.0	0.0	0.0	0.0	0.0	0.0	0.0	0.0	0.0	0.0	0.0	0.0	0.0	0.0	0.0	44.0	0.0
OTU 1648	0.0	0.0	0.0	0.0	0.0	0.0	0.0	0.0	0.0	0.0	0.0	0.0	0.0	0.0	0.0	0.0	0.0	0.0	0.0	0.0	0.0	0.0	0.0	0.0	0.0	0.0	0.0	0.0	0.0	44.0	0.0
OTU 1649	0.0	0.0	0.0	0.0	0.0	0.0	0.0	0.0	0.0	0.0	0.0	0.0	0.0	0.0	0.0	0.0	0.0	0.0	0.0	0.0	0.0	0.0	0.0	0.0	0.0	0.0	0.0	0.0	0.0	0.0	44.0
OTU 1650	0.0	0.0	0.0	27.0	0.0	0.0	0.0	0.0	0.0	16.0	0.0	0.0	0.0	0.0	0.0	0.0	0.0	0.0	0.0	0.0	0.0	0.0	0.0	0.0	0.0	0.0	0.0	0.0	0.0	0.0	0.0
OTU 1651	0.0	0.0	0.0	0.0	0.0	0.0	43.0	0.0	0.0	0.0	0.0	0.0	0.0	0.0	0.0	0.0	0.0	0.0	0.0	0.0	0.0	0.0	0.0	0.0	0.0	0.0	0.0	0.0	0.0	0.0	0.0
OTU 1652	0.0	0.0	0.0	0.0	0.0	0.0	43.0	0.0	0.0	0.0	0.0	0.0	0.0	0.0	0.0	0.0	0.0	0.0	0.0	0.0	0.0	0.0	0.0	0.0	0.0	0.0	0.0	0.0	0.0	0.0	0.0
OTU 1653	0.0	0.0	0.0	0.0	0.0	0.0	43.0	0.0	0.0	0.0	0.0	0.0	0.0	0.0	0.0	0.0	0.0	0.0	0.0	0.0	0.0	0.0	0.0	0.0	0.0	0.0	0.0	0.0	0.0	0.0	0.0
OTU 1654	0.0	0.0	0.0	0.0	0.0	0.0	43.0	0.0	0.0	0.0	0.0	0.0	0.0	0.0	0.0	0.0	0.0	0.0	0.0	0.0	0.0	0.0	0.0	0.0	0.0	0.0	0.0	0.0	0.0	0.0	0.0
OTU 1655	0.0	0.0	0.0	0.0	0.0	0.0	21.0	0.0	0.0	0.0	0.0	0.0	0.0	0.0	0.0	0.0	0.0	0.0	0.0	0.0	0.0	0.0	0.0	0.0	0.0	0.0	0.0	0.0	22.0	0.0	0.0
OTU 1656	0.0	0.0	0.0	0.0	0.0	0.0	0.0	0.0	0.0	0.0	0.0	43.0	0.0	0.0	0.0	0.0	0.0	0.0	0.0	0.0	0.0	0.0	0.0	0.0	0.0	0.0	0.0	0.0	0.0	0.0	0.0
OTU 1657	0.0	0.0	0.0	0.0	0.0	0.0	0.0	0.0	0.0	0.0	0.0	0.0	0.0	0.0	0.0	0.0	43.0	0.0	0.0	0.0	0.0	0.0	0.0	0.0	0.0	0.0	0.0	0.0	0.0	0.0	0.0
OTU 1658	0.0	0.0	0.0	0.0	0.0	0.0	0.0	0.0	0.0	0.0	0.0	0.0	0.0	0.0	0.0	0.0	0.0	0.0	0.0	43.0	0.0	0.0	0.0	0.0	0.0	0.0	0.0	0.0	0.0	0.0	0.0
OTU 1659	0.0	0.0	0.0	0.0	0.0	0.0	0.0	0.0	0.0	0.0	0.0	0.0	0.0	0.0	0.0	0.0	0.0	0.0	0.0	43.0	0.0	0.0	0.0	0.0	0.0	0.0	0.0	0.0	0.0	0.0	0.0
OTU 1660	0.0	0.0	0.0	0.0	0.0	0.0	0.0	0.0	0.0	0.0	0.0	0.0	0.0	0.0	0.0	0.0	0.0	0.0	0.0	0.0	0.0	43.0	0.0	0.0	0.0	0.0	0.0	0.0	0.0	0.0	0.0
OTU 1661	0.0	0.0	0.0	0.0	0.0	0.0	0.0	0.0	0.0	0.0	0.0	0.0	0.0	0.0	0.0	0.0	0.0	0.0	0.0	0.0	0.0	43.0	0.0	0.0	0.0	0.0	0.0	0.0	0.0	0.0	0.0
OTU 1662	0.0	0.0	0.0	0.0	0.0	0.0	0.0	0.0	0.0	0.0	0.0	0.0	0.0	0.0	0.0	0.0	0.0	0.0	0.0	0.0	0.0	43.0	0.0	0.0	0.0	0.0	0.0	0.0	0.0	0.0	0.0
OTU 1663	0.0	0.0	0.0	0.0	0.0	0.0	0.0	0.0	0.0	0.0	0.0	0.0	0.0	0.0	0.0	0.0	0.0	0.0	0.0	0.0	0.0	0.0	0.0	0.0	43.0	0.0	0.0	0.0	0.0	0.0	0.0
OTU 1664	0.0	0.0	42.0	0.0	0.0	0.0	0.0	0.0	0.0	0.0	0.0	0.0	0.0	0.0	0.0	0.0	0.0	0.0	0.0	0.0	0.0	0.0	0.0	0.0	0.0	0.0	0.0	0.0	0.0	0.0	0.0
OTU 1665	0.0	0.0	0.0	22.0	0.0	0.0	0.0	0.0	0.0	0.0	0.0	0.0	0.0	20.0	0.0	0.0	0.0	0.0	0.0	0.0	0.0	0.0	0.0	0.0	0.0	0.0	0.0	0.0	0.0	0.0	0.0
OTU 1666	0.0	0.0	0.0	0.0	42.0	0.0	0.0	0.0	0.0	0.0	0.0	0.0	0.0	0.0	0.0	0.0	0.0	0.0	0.0	0.0	0.0	0.0	0.0	0.0	0.0	0.0	0.0	0.0	0.0	0.0	0.0
OTU 1667	0.0	0.0	0.0	0.0	42.0	0.0	0.0	0.0	0.0	0.0	0.0	0.0	0.0	0.0	0.0	0.0	0.0	0.0	0.0	0.0	0.0	0.0	0.0	0.0	0.0	0.0	0.0	0.0	0.0	0.0	0.0
OTU 1668	0.0	0.0	0.0	0.0	0.0	42.0	0.0	0.0	0.0	0.0	0.0	0.0	0.0	0.0	0.0	0.0	0.0	0.0	0.0	0.0	0.0	0.0	0.0	0.0	0.0	0.0	0.0	0.0	0.0	0.0	0.0
OTU 1669	0.0	0.0	0.0	0.0	0.0	0.0	42.0	0.0	0.0	0.0	0.0	0.0	0.0	0.0	0.0	0.0	0.0	0.0	0.0	0.0	0.0	0.0	0.0	0.0	0.0	0.0	0.0	0.0	0.0	0.0	0.0
OTU 1670	0.0	0.0	0.0	0.0	0.0	0.0	0.0	42.0	0.0	0.0	0.0	0.0	0.0	0.0	0.0	0.0	0.0	0.0	0.0	0.0	0.0	0.0	0.0	0.0	0.0	0.0	0.0	0.0	0.0	0.0	0.0
OTU 1671	0.0	0.0	0.0	0.0	0.0	0.0	0.0	0.0	42.0	0.0	0.0	0.0	0.0	0.0	0.0	0.0	0.0	0.0	0.0	0.0	0.0	0.0	0.0	0.0	0.0	0.0	0.0	0.0	0.0	0.0	0.0
OTU 1672	0.0	0.0	0.0	0.0	0.0	0.0	0.0	0.0	42.0	0.0	0.0	0.0	0.0	0.0	0.0	0.0	0.0	0.0	0.0	0.0	0.0	0.0	0.0	0.0	0.0	0.0	0.0	0.0	0.0	0.0	0.0
OTU 1673	0.0	0.0	0.0	0.0	0.0	0.0	0.0	0.0	0.0	42.0	0.0	0.0	0.0	0.0	0.0	0.0	0.0	0.0	0.0	0.0	0.0	0.0	0.0	0.0	0.0	0.0	0.0	0.0	0.0	0.0	0.0
OTU 1674	0.0	0.0	0.0	0.0	0.0	0.0	0.0	0.0	0.0	0.0	42.0	0.0	0.0	0.0	0.0	0.0	0.0	0.0	0.0	0.0	0.0	0.0	0.0	0.0	0.0	0.0	0.0	0.0	0.0	0.0	0.0
OTU 1675	0.0	0.0	0.0	0.0	0.0	0.0	0.0	0.0	0.0	0.0	42.0	0.0	0.0	0.0	0.0	0.0	0.0	0.0	0.0	0.0	0.0	0.0	0.0	0.0	0.0	0.0	0.0	0.0	0.0	0.0	0.0
OTU 1676	0.0	0.0	0.0	0.0	0.0	0.0	0.0	0.0	0.0	0.0	42.0	0.0	0.0	0.0	0.0	0.0	0.0	0.0	0.0	0.0	0.0	0.0	0.0	0.0	0.0	0.0	0.0	0.0	0.0	0.0	0.0
OTU 1677	0.0	0.0	0.0	0.0	0.0	0.0	0.0	0.0	0.0	0.0	42.0	0.0	0.0	0.0	0.0	0.0	0.0	0.0	0.0	0.0	0.0	0.0	0.0	0.0	0.0	0.0	0.0	0.0	0.0	0.0	0.0
OTU 1678	0.0	0.0	0.0	0.0	0.0	0.0	0.0	0.0	0.0	0.0	0.0	42.0	0.0	0.0	0.0	0.0	0.0	0.0	0.0	0.0	0.0	0.0	0.0	0.0	0.0	0.0	0.0	0.0	0.0	0.0	0.0
OTU 1679	0.0	0.0	0.0	0.0	0.0	0.0	0.0	0.0	0.0	0.0	0.0	42.0	0.0	0.0	0.0	0.0	0.0	0.0	0.0	0.0	0.0	0.0	0.0	0.0	0.0	0.0	0.0	0.0	0.0	0.0	0.0
OTU 1680	0.0	0.0	0.0	0.0	0.0	0.0	0.0	0.0	0.0	0.0	0.0	0.0	0.0	42.0	0.0	0.0	0.0	0.0	0.0	0.0	0.0	0.0	0.0	0.0	0.0	0.0	0.0	0.0	0.0	0.0	0.0
OTU 1681	0.0	0.0	0.0	0.0	0.0	0.0	0.0	0.0	0.0	0.0	0.0	0.0	0.0	42.0	0.0	0.0	0.0	0.0	0.0	0.0	0.0	0.0	0.0	0.0	0.0	0.0	0.0	0.0	0.0	0.0	0.0
OTU 1682	0.0	0.0	0.0	0.0	0.0	0.0	0.0	0.0	0.0	0.0	0.0	0.0	0.0	42.0	0.0	0.0	0.0	0.0	0.0	0.0	0.0	0.0	0.0	0.0	0.0	0.0	0.0	0.0	0.0	0.0	0.0
OTU 1683	0.0	0.0	0.0	0.0	0.0	0.0	0.0	0.0	0.0	0.0	0.0	0.0	0.0	0.0	42.0	0.0	0.0	0.0	0.0	0.0	0.0	0.0	0.0	0.0	0.0	0.0	0.0	0.0	0.0	0.0	0.0
OTU 1684	0.0	0.0	0.0	0.0	0.0	0.0	0.0	0.0	0.0	0.0	0.0	0.0	0.0	0.0	42.0	0.0	0.0	0.0	0.0	0.0	0.0	0.0	0.0	0.0	0.0	0.0	0.0	0.0	0.0	0.0	0.0
OTU 1685	0.0	0.0	0.0	0.0	0.0	0.0	0.0	0.0	0.0	0.0	0.0	0.0	0.0	0.0	0.0	0.0	0.0	0.0	0.0	0.0	42.0	0.0	0.0	0.0	0.0	0.0	0.0	0.0	0.0	0.0	0.0
OTU 1686	0.0	0.0	0.0	0.0	0.0	0.0	0.0	0.0	0.0	0.0	0.0	0.0	0.0	0.0	0.0	0.0	0.0	0.0	0.0	0.0	42.0	0.0	0.0	0.0	0.0	0.0	0.0	0.0	0.0	0.0	0.0
OTU 1687	0.0	0.0	0.0	0.0	0.0	0.0	0.0	0.0	0.0	0.0	0.0	0.0	0.0	0.0	0.0	0.0	0.0	0.0	0.0	0.0	0.0	42.0	0.0	0.0	0.0	0.0	0.0	0.0	0.0	0.0	0.0
OTU 1688	0.0	0.0	0.0	0.0	0.0	0.0	0.0	0.0	0.0	0.0	0.0	0.0	0.0	0.0	0.0	0.0	0.0	0.0	0.0	0.0	0.0	0.0	42.0	0.0	0.0	0.0	0.0	0.0	0.0	0.0	0.0
OTU 1689	0.0	0.0	0.0	0.0	0.0	0.0	0.0	0.0	0.0	0.0	0.0	0.0	0.0	0.0	0.0	0.0	0.0	0.0	0.0	0.0	0.0	0.0	0.0	0.0	0.0	0.0	42.0	0.0	0.0	0.0	0.0
OTU 1690	0.0	0.0	41.0	0.0	0.0	0.0	0.0	0.0	0.0	0.0	0.0	0.0	0.0	0.0	0.0	0.0	0.0	0.0	0.0	0.0	0.0	0.0	0.0	0.0	0.0	0.0	0.0	0.0	0.0	0.0	0.0
OTU 1691	0.0	0.0	41.0	0.0	0.0	0.0	0.0	0.0	0.0	0.0	0.0	0.0	0.0	0.0	0.0	0.0	0.0	0.0	0.0	0.0	0.0	0.0	0.0	0.0	0.0	0.0	0.0	0.0	0.0	0.0	0.0
OTU 1692	0.0	0.0	20.0	0.0	0.0	0.0	0.0	0.0	0.0	0.0	0.0	0.0	0.0	0.0	0.0	0.0	0.0	0.0	0.0	0.0	0.0	0.0	0.0	21.0	0.0	0.0	0.0	0.0	0.0	0.0	0.0
OTU 1693	0.0	0.0	0.0	41.0	0.0	0.0	0.0	0.0	0.0	0.0	0.0	0.0	0.0	0.0	0.0	0.0	0.0	0.0	0.0	0.0	0.0	0.0	0.0	0.0	0.0	0.0	0.0	0.0	0.0	0.0	0.0
OTU 1694	0.0	0.0	0.0	0.0	41.0	0.0	0.0	0.0	0.0	0.0	0.0	0.0	0.0	0.0	0.0	0.0	0.0	0.0	0.0	0.0	0.0	0.0	0.0	0.0	0.0	0.0	0.0	0.0	0.0	0.0	0.0
OTU 1695	0.0	0.0	0.0	0.0	20.0	0.0	0.0	0.0	0.0	0.0	21.0	0.0	0.0	0.0	0.0	0.0	0.0	0.0	0.0	0.0	0.0	0.0	0.0	0.0	0.0	0.0	0.0	0.0	0.0	0.0	0.0
OTU 1696	0.0	0.0	0.0	0.0	0.0	41.0	0.0	0.0	0.0	0.0	0.0	0.0	0.0	0.0	0.0	0.0	0.0	0.0	0.0	0.0	0.0	0.0	0.0	0.0	0.0	0.0	0.0	0.0	0.0	0.0	0.0
OTU 1697	0.0	0.0	0.0	0.0	0.0	0.0	41.0	0.0	0.0	0.0	0.0	0.0	0.0	0.0	0.0	0.0	0.0	0.0	0.0	0.0	0.0	0.0	0.0	0.0	0.0	0.0	0.0	0.0	0.0	0.0	0.0
OTU 1698	0.0	0.0	0.0	0.0	0.0	0.0	0.0	41.0	0.0	0.0	0.0	0.0	0.0	0.0	0.0	0.0	0.0	0.0	0.0	0.0	0.0	0.0	0.0	0.0	0.0	0.0	0.0	0.0	0.0	0.0	0.0
OTU 1699	0.0	0.0	0.0	0.0	0.0	0.0	0.0	0.0	0.0	41.0	0.0	0.0	0.0	0.0	0.0	0.0	0.0	0.0	0.0	0.0	0.0	0.0	0.0	0.0	0.0	0.0	0.0	0.0	0.0	0.0	0.0
OTU 1700	0.0	0.0	0.0	0.0	0.0	0.0	0.0	0.0	0.0	0.0	0.0	0.0	41.0	0.0	0.0	0.0	0.0	0.0	0.0	0.0	0.0	0.0	0.0	0.0	0.0	0.0	0.0	0.0	0.0	0.0	0.0
OTU 1701	0.0	0.0	0.0	0.0	0.0	0.0	0.0	0.0	0.0	0.0	0.0	0.0	41.0	0.0	0.0	0.0	0.0	0.0	0.0	0.0	0.0	0.0	0.0	0.0	0.0	0.0	0.0	0.0	0.0	0.0	0.0
OTU 1702	0.0	0.0	0.0	0.0	0.0	0.0	0.0	0.0	0.0	0.0	0.0	0.0	0.0	41.0	0.0	0.0	0.0	0.0	0.0	0.0	0.0	0.0	0.0	0.0	0.0	0.0	0.0	0.0	0.0	0.0	0.0
OTU 1703	0.0	0.0	0.0	0.0	0.0	0.0	0.0	0.0	0.0	0.0	0.0	0.0	0.0	0.0	41.0	0.0	0.0	0.0	0.0	0.0	0.0	0.0	0.0	0.0	0.0	0.0	0.0	0.0	0.0	0.0	0.0
OTU 1704	0.0	0.0	0.0	0.0	0.0	0.0	0.0	0.0	0.0	0.0	0.0	0.0	0.0	0.0	0.0	0.0	41.0	0.0	0.0	0.0	0.0	0.0	0.0	0.0	0.0	0.0	0.0	0.0	0.0	0.0	0.0
OTU 1705	0.0	0.0	0.0	0.0	0.0	0.0	0.0	0.0	0.0	0.0	0.0	0.0	0.0	0.0	0.0	0.0	0.0	0.0	41.0	0.0	0.0	0.0	0.0	0.0	0.0	0.0	0.0	0.0	0.0	0.0	0.0
OTU 1706	0.0	0.0	0.0	0.0	0.0	0.0	0.0	0.0	0.0	0.0	0.0	0.0	0.0	0.0	0.0	0.0	0.0	0.0	0.0	0.0	41.0	0.0	0.0	0.0	0.0	0.0	0.0	0.0	0.0	0.0	0.0
OTU 1707	0.0	0.0	0.0	0.0	0.0	0.0	0.0	0.0	0.0	0.0	0.0	0.0	0.0	0.0	0.0	0.0	0.0	0.0	0.0	0.0	0.0	41.0	0.0	0.0	0.0	0.0	0.0	0.0	0.0	0.0	0.0
OTU 1708	0.0	0.0	0.0	0.0	0.0	0.0	0.0	0.0	0.0	0.0	0.0	0.0	0.0	0.0	0.0	0.0	0.0	0.0	0.0	0.0	0.0	0.0	41.0	0.0	0.0	0.0	0.0	0.0	0.0	0.0	0.0
OTU 1709	0.0	0.0	0.0	0.0	0.0	0.0	0.0	0.0	0.0	0.0	0.0	0.0	0.0	0.0	0.0	0.0	0.0	0.0	0.0	0.0	0.0	0.0	0.0	0.0	41.0	0.0	0.0	0.0	0.0	0.0	0.0
OTU 1710	0.0	0.0	0.0	0.0	0.0	0.0	0.0	0.0	0.0	0.0	0.0	0.0	0.0	0.0	0.0	0.0	0.0	0.0	0.0	0.0	0.0	0.0	0.0	0.0	41.0	0.0	0.0	0.0	0.0	0.0	0.0
OTU 1711	0.0	0.0	0.0	0.0	0.0	0.0	0.0	0.0	0.0	0.0	0.0	0.0	0.0	0.0	0.0	0.0	0.0	0.0	0.0	0.0	0.0	0.0	0.0	0.0	0.0	41.0	0.0	0.0	0.0	0.0	0.0
OTU 1712	0.0	0.0	0.0	0.0	0.0	0.0	0.0	0.0	0.0	0.0	0.0	0.0	0.0	0.0	0.0	0.0	0.0	0.0	0.0	0.0	0.0	0.0	0.0	0.0	0.0	0.0	41.0	0.0	0.0	0.0	0.0
OTU 1713	0.0	0.0	0.0	0.0	0.0	0.0	0.0	0.0	0.0	0.0	0.0	0.0	0.0	0.0	0.0	0.0	0.0	0.0	0.0	0.0	0.0	0.0	0.0	0.0	0.0	0.0	0.0	41.0	0.0	0.0	0.0
OTU 1714	0.0	0.0	0.0	0.0	0.0	0.0	0.0	0.0	0.0	0.0	0.0	0.0	0.0	0.0	0.0	0.0	0.0	0.0	0.0	0.0	0.0	0.0	0.0	0.0	0.0	0.0	0.0	41.0	0.0	0.0	0.0
OTU 1715	0.0	0.0	0.0	0.0	0.0	0.0	0.0	0.0	0.0	0.0	0.0	0.0	0.0	0.0	0.0	0.0	0.0	0.0	0.0	0.0	0.0	0.0	0.0	0.0	0.0	0.0	0.0	0.0	0.0	41.0	0.0
OTU 1716	0.0	0.0	0.0	0.0	0.0	0.0	0.0	0.0	0.0	0.0	0.0	0.0	0.0	0.0	0.0	0.0	0.0	0.0	0.0	0.0	0.0	0.0	0.0	0.0	0.0	0.0	0.0	0.0	0.0	41.0	0.0
OTU 1717	0.0	0.0	0.0	0.0	0.0	0.0	0.0	0.0	0.0	0.0	0.0	0.0	0.0	0.0	0.0	0.0	0.0	0.0	0.0	0.0	0.0	0.0	0.0	0.0	0.0	0.0	0.0	0.0	0.0	0.0	41.0
OTU 1718	0.0	40.0	0.0	0.0	0.0	0.0	0.0	0.0	0.0	0.0	0.0	0.0	0.0	0.0	0.0	0.0	0.0	0.0	0.0	0.0	0.0	0.0	0.0	0.0	0.0	0.0	0.0	0.0	0.0	0.0	0.0
OTU 1719	0.0	0.0	40.0	0.0	0.0	0.0	0.0	0.0	0.0	0.0	0.0	0.0	0.0	0.0	0.0	0.0	0.0	0.0	0.0	0.0	0.0	0.0	0.0	0.0	0.0	0.0	0.0	0.0	0.0	0.0	0.0
OTU 1720	0.0	0.0	40.0	0.0	0.0	0.0	0.0	0.0	0.0	0.0	0.0	0.0	0.0	0.0	0.0	0.0	0.0	0.0	0.0	0.0	0.0	0.0	0.0	0.0	0.0	0.0	0.0	0.0	0.0	0.0	0.0
OTU 1721	0.0	0.0	0.0	0.0	40.0	0.0	0.0	0.0	0.0	0.0	0.0	0.0	0.0	0.0	0.0	0.0	0.0	0.0	0.0	0.0	0.0	0.0	0.0	0.0	0.0	0.0	0.0	0.0	0.0	0.0	0.0
OTU 1722	0.0	0.0	0.0	0.0	40.0	0.0	0.0	0.0	0.0	0.0	0.0	0.0	0.0	0.0	0.0	0.0	0.0	0.0	0.0	0.0	0.0	0.0	0.0	0.0	0.0	0.0	0.0	0.0	0.0	0.0	0.0
OTU 1723	0.0	0.0	0.0	0.0	0.0	40.0	0.0	0.0	0.0	0.0	0.0	0.0	0.0	0.0	0.0	0.0	0.0	0.0	0.0	0.0	0.0	0.0	0.0	0.0	0.0	0.0	0.0	0.0	0.0	0.0	0.0
OTU 1724	0.0	0.0	0.0	0.0	0.0	0.0	40.0	0.0	0.0	0.0	0.0	0.0	0.0	0.0	0.0	0.0	0.0	0.0	0.0	0.0	0.0	0.0	0.0	0.0	0.0	0.0	0.0	0.0	0.0	0.0	0.0
OTU 1725	0.0	0.0	0.0	0.0	0.0	0.0	40.0	0.0	0.0	0.0	0.0	0.0	0.0	0.0	0.0	0.0	0.0	0.0	0.0	0.0	0.0	0.0	0.0	0.0	0.0	0.0	0.0	0.0	0.0	0.0	0.0
OTU 1726	0.0	0.0	0.0	0.0	0.0	0.0	0.0	0.0	0.0	40.0	0.0	0.0	0.0	0.0	0.0	0.0	0.0	0.0	0.0	0.0	0.0	0.0	0.0	0.0	0.0	0.0	0.0	0.0	0.0	0.0	0.0
OTU 1727	0.0	0.0	0.0	0.0	0.0	0.0	0.0	0.0	0.0	0.0	40.0	0.0	0.0	0.0	0.0	0.0	0.0	0.0	0.0	0.0	0.0	0.0	0.0	0.0	0.0	0.0	0.0	0.0	0.0	0.0	0.0
OTU 1728	0.0	0.0	0.0	0.0	0.0	0.0	0.0	0.0	0.0	0.0	40.0	0.0	0.0	0.0	0.0	0.0	0.0	0.0	0.0	0.0	0.0	0.0	0.0	0.0	0.0	0.0	0.0	0.0	0.0	0.0	0.0
OTU 1729	0.0	0.0	0.0	0.0	0.0	0.0	0.0	0.0	0.0	0.0	40.0	0.0	0.0	0.0	0.0	0.0	0.0	0.0	0.0	0.0	0.0	0.0	0.0	0.0	0.0	0.0	0.0	0.0	0.0	0.0	0.0
OTU 1730	0.0	0.0	0.0	0.0	0.0	0.0	0.0	0.0	0.0	0.0	40.0	0.0	0.0	0.0	0.0	0.0	0.0	0.0	0.0	0.0	0.0	0.0	0.0	0.0	0.0	0.0	0.0	0.0	0.0	0.0	0.0
OTU 1731	0.0	0.0	0.0	0.0	0.0	0.0	0.0	0.0	0.0	0.0	0.0	40.0	0.0	0.0	0.0	0.0	0.0	0.0	0.0	0.0	0.0	0.0	0.0	0.0	0.0	0.0	0.0	0.0	0.0	0.0	0.0
OTU 1732	0.0	0.0	0.0	0.0	0.0	0.0	0.0	0.0	0.0	0.0	0.0	0.0	0.0	0.0	40.0	0.0	0.0	0.0	0.0	0.0	0.0	0.0	0.0	0.0	0.0	0.0	0.0	0.0	0.0	0.0	0.0
OTU 1733	0.0	0.0	0.0	0.0	0.0	0.0	0.0	0.0	0.0	0.0	0.0	0.0	0.0	0.0	40.0	0.0	0.0	0.0	0.0	0.0	0.0	0.0	0.0	0.0	0.0	0.0	0.0	0.0	0.0	0.0	0.0
OTU 1734	0.0	0.0	0.0	0.0	0.0	0.0	0.0	0.0	0.0	0.0	0.0	0.0	0.0	0.0	0.0	0.0	0.0	0.0	40.0	0.0	0.0	0.0	0.0	0.0	0.0	0.0	0.0	0.0	0.0	0.0	0.0
OTU 1735	0.0	0.0	0.0	0.0	0.0	0.0	0.0	0.0	0.0	0.0	0.0	0.0	0.0	0.0	0.0	0.0	0.0	0.0	0.0	0.0	0.0	0.0	40.0	0.0	0.0	0.0	0.0	0.0	0.0	0.0	0.0
OTU 1736	0.0	0.0	0.0	0.0	0.0	0.0	0.0	0.0	0.0	0.0	0.0	0.0	0.0	0.0	0.0	0.0	0.0	0.0	0.0	0.0	0.0	0.0	0.0	0.0	40.0	0.0	0.0	0.0	0.0	0.0	0.0
OTU 1737	0.0	0.0	0.0	0.0	0.0	0.0	0.0	0.0	0.0	0.0	0.0	0.0	0.0	0.0	0.0	0.0	0.0	0.0	0.0	0.0	0.0	0.0	0.0	0.0	0.0	40.0	0.0	0.0	0.0	0.0	0.0
OTU 1738	0.0	0.0	0.0	0.0	0.0	0.0	0.0	0.0	0.0	0.0	0.0	0.0	0.0	0.0	0.0	0.0	0.0	0.0	0.0	0.0	0.0	0.0	0.0	0.0	0.0	0.0	0.0	0.0	0.0	40.0	0.0
OTU 1739	0.0	0.0	0.0	0.0	0.0	0.0	0.0	0.0	0.0	0.0	0.0	0.0	0.0	0.0	0.0	0.0	0.0	0.0	0.0	0.0	0.0	0.0	0.0	0.0	0.0	0.0	0.0	0.0	0.0	40.0	0.0
OTU 1740	0.0	0.0	0.0	0.0	0.0	0.0	0.0	0.0	0.0	0.0	0.0	0.0	0.0	0.0	0.0	0.0	0.0	0.0	0.0	0.0	0.0	0.0	0.0	0.0	0.0	0.0	0.0	0.0	0.0	0.0	40.0
OTU 1741	0.0	0.0	0.0	39.0	0.0	0.0	0.0	0.0	0.0	0.0	0.0	0.0	0.0	0.0	0.0	0.0	0.0	0.0	0.0	0.0	0.0	0.0	0.0	0.0	0.0	0.0	0.0	0.0	0.0	0.0	0.0
OTU 1742	0.0	0.0	0.0	0.0	0.0	0.0	39.0	0.0	0.0	0.0	0.0	0.0	0.0	0.0	0.0	0.0	0.0	0.0	0.0	0.0	0.0	0.0	0.0	0.0	0.0	0.0	0.0	0.0	0.0	0.0	0.0
OTU 1743	0.0	0.0	0.0	0.0	0.0	0.0	39.0	0.0	0.0	0.0	0.0	0.0	0.0	0.0	0.0	0.0	0.0	0.0	0.0	0.0	0.0	0.0	0.0	0.0	0.0	0.0	0.0	0.0	0.0	0.0	0.0
OTU 1744	0.0	0.0	0.0	0.0	0.0	0.0	39.0	0.0	0.0	0.0	0.0	0.0	0.0	0.0	0.0	0.0	0.0	0.0	0.0	0.0	0.0	0.0	0.0	0.0	0.0	0.0	0.0	0.0	0.0	0.0	0.0
OTU 1745	0.0	0.0	0.0	0.0	0.0	0.0	0.0	39.0	0.0	0.0	0.0	0.0	0.0	0.0	0.0	0.0	0.0	0.0	0.0	0.0	0.0	0.0	0.0	0.0	0.0	0.0	0.0	0.0	0.0	0.0	0.0
OTU 1746	0.0	0.0	0.0	0.0	0.0	0.0	0.0	0.0	0.0	39.0	0.0	0.0	0.0	0.0	0.0	0.0	0.0	0.0	0.0	0.0	0.0	0.0	0.0	0.0	0.0	0.0	0.0	0.0	0.0	0.0	0.0
OTU 1747	0.0	0.0	0.0	0.0	0.0	0.0	0.0	0.0	0.0	39.0	0.0	0.0	0.0	0.0	0.0	0.0	0.0	0.0	0.0	0.0	0.0	0.0	0.0	0.0	0.0	0.0	0.0	0.0	0.0	0.0	0.0
OTU 1748	0.0	0.0	0.0	0.0	0.0	0.0	0.0	0.0	0.0	39.0	0.0	0.0	0.0	0.0	0.0	0.0	0.0	0.0	0.0	0.0	0.0	0.0	0.0	0.0	0.0	0.0	0.0	0.0	0.0	0.0	0.0
OTU 1749	0.0	0.0	0.0	0.0	0.0	0.0	0.0	0.0	0.0	0.0	0.0	39.0	0.0	0.0	0.0	0.0	0.0	0.0	0.0	0.0	0.0	0.0	0.0	0.0	0.0	0.0	0.0	0.0	0.0	0.0	0.0
OTU 1750	0.0	0.0	0.0	0.0	0.0	0.0	0.0	0.0	0.0	0.0	0.0	0.0	0.0	39.0	0.0	0.0	0.0	0.0	0.0	0.0	0.0	0.0	0.0	0.0	0.0	0.0	0.0	0.0	0.0	0.0	0.0
OTU 1751	0.0	0.0	0.0	0.0	0.0	0.0	0.0	0.0	0.0	0.0	0.0	0.0	0.0	0.0	39.0	0.0	0.0	0.0	0.0	0.0	0.0	0.0	0.0	0.0	0.0	0.0	0.0	0.0	0.0	0.0	0.0
OTU 1752	0.0	0.0	0.0	0.0	0.0	0.0	0.0	0.0	0.0	0.0	0.0	0.0	0.0	0.0	0.0	0.0	0.0	0.0	0.0	0.0	0.0	39.0	0.0	0.0	0.0	0.0	0.0	0.0	0.0	0.0	0.0
OTU 1753	0.0	0.0	0.0	0.0	0.0	0.0	0.0	0.0	0.0	0.0	0.0	0.0	0.0	0.0	0.0	0.0	0.0	0.0	0.0	0.0	0.0	0.0	39.0	0.0	0.0	0.0	0.0	0.0	0.0	0.0	0.0
OTU 1754	0.0	0.0	0.0	0.0	0.0	0.0	0.0	0.0	0.0	0.0	0.0	0.0	0.0	0.0	0.0	0.0	0.0	0.0	0.0	0.0	0.0	0.0	0.0	39.0	0.0	0.0	0.0	0.0	0.0	0.0	0.0
OTU 1755	0.0	0.0	0.0	0.0	0.0	0.0	0.0	0.0	0.0	0.0	0.0	0.0	0.0	0.0	0.0	0.0	0.0	0.0	0.0	0.0	0.0	0.0	0.0	39.0	0.0	0.0	0.0	0.0	0.0	0.0	0.0
OTU 1756	0.0	0.0	0.0	0.0	0.0	0.0	0.0	0.0	0.0	0.0	0.0	0.0	0.0	0.0	0.0	0.0	0.0	0.0	0.0	0.0	0.0	0.0	0.0	0.0	0.0	0.0	39.0	0.0	0.0	0.0	0.0
OTU 1757	0.0	0.0	0.0	0.0	0.0	0.0	0.0	0.0	0.0	0.0	0.0	0.0	0.0	0.0	0.0	0.0	0.0	0.0	0.0	0.0	0.0	0.0	0.0	0.0	0.0	0.0	0.0	39.0	0.0	0.0	0.0
OTU 1758	0.0	38.0	0.0	0.0	0.0	0.0	0.0	0.0	0.0	0.0	0.0	0.0	0.0	0.0	0.0	0.0	0.0	0.0	0.0	0.0	0.0	0.0	0.0	0.0	0.0	0.0	0.0	0.0	0.0	0.0	0.0
OTU 1759	0.0	0.0	38.0	0.0	0.0	0.0	0.0	0.0	0.0	0.0	0.0	0.0	0.0	0.0	0.0	0.0	0.0	0.0	0.0	0.0	0.0	0.0	0.0	0.0	0.0	0.0	0.0	0.0	0.0	0.0	0.0
OTU 1760	0.0	0.0	0.0	38.0	0.0	0.0	0.0	0.0	0.0	0.0	0.0	0.0	0.0	0.0	0.0	0.0	0.0	0.0	0.0	0.0	0.0	0.0	0.0	0.0	0.0	0.0	0.0	0.0	0.0	0.0	0.0
OTU 1761	0.0	0.0	0.0	38.0	0.0	0.0	0.0	0.0	0.0	0.0	0.0	0.0	0.0	0.0	0.0	0.0	0.0	0.0	0.0	0.0	0.0	0.0	0.0	0.0	0.0	0.0	0.0	0.0	0.0	0.0	0.0
OTU 1762	0.0	0.0	0.0	0.0	0.0	0.0	38.0	0.0	0.0	0.0	0.0	0.0	0.0	0.0	0.0	0.0	0.0	0.0	0.0	0.0	0.0	0.0	0.0	0.0	0.0	0.0	0.0	0.0	0.0	0.0	0.0
OTU 1763	0.0	0.0	0.0	0.0	0.0	0.0	38.0	0.0	0.0	0.0	0.0	0.0	0.0	0.0	0.0	0.0	0.0	0.0	0.0	0.0	0.0	0.0	0.0	0.0	0.0	0.0	0.0	0.0	0.0	0.0	0.0
OTU 1764	0.0	0.0	0.0	0.0	0.0	0.0	0.0	38.0	0.0	0.0	0.0	0.0	0.0	0.0	0.0	0.0	0.0	0.0	0.0	0.0	0.0	0.0	0.0	0.0	0.0	0.0	0.0	0.0	0.0	0.0	0.0
OTU 1765	0.0	0.0	0.0	0.0	0.0	0.0	0.0	0.0	0.0	0.0	38.0	0.0	0.0	0.0	0.0	0.0	0.0	0.0	0.0	0.0	0.0	0.0	0.0	0.0	0.0	0.0	0.0	0.0	0.0	0.0	0.0
OTU 1766	0.0	0.0	0.0	0.0	0.0	0.0	0.0	0.0	0.0	0.0	0.0	0.0	0.0	38.0	0.0	0.0	0.0	0.0	0.0	0.0	0.0	0.0	0.0	0.0	0.0	0.0	0.0	0.0	0.0	0.0	0.0
OTU 1767	0.0	0.0	0.0	0.0	0.0	0.0	0.0	0.0	0.0	0.0	0.0	0.0	0.0	23.0	0.0	0.0	0.0	0.0	0.0	0.0	0.0	0.0	15.0	0.0	0.0	0.0	0.0	0.0	0.0	0.0	0.0
OTU 1768	0.0	0.0	0.0	0.0	0.0	0.0	0.0	0.0	0.0	0.0	0.0	0.0	0.0	0.0	0.0	0.0	0.0	38.0	0.0	0.0	0.0	0.0	0.0	0.0	0.0	0.0	0.0	0.0	0.0	0.0	0.0
OTU 1769	0.0	0.0	0.0	0.0	0.0	0.0	0.0	0.0	0.0	0.0	0.0	0.0	0.0	0.0	0.0	0.0	0.0	0.0	38.0	0.0	0.0	0.0	0.0	0.0	0.0	0.0	0.0	0.0	0.0	0.0	0.0
OTU 1770	0.0	0.0	0.0	0.0	0.0	0.0	0.0	0.0	0.0	0.0	0.0	0.0	0.0	0.0	0.0	0.0	0.0	0.0	0.0	0.0	0.0	0.0	0.0	0.0	38.0	0.0	0.0	0.0	0.0	0.0	0.0
OTU 1771	0.0	0.0	0.0	0.0	0.0	0.0	0.0	0.0	0.0	0.0	0.0	0.0	0.0	0.0	0.0	0.0	0.0	0.0	0.0	0.0	0.0	0.0	0.0	0.0	0.0	38.0	0.0	0.0	0.0	0.0	0.0
OTU 1772	0.0	0.0	0.0	0.0	0.0	0.0	0.0	0.0	0.0	0.0	0.0	0.0	0.0	0.0	0.0	0.0	0.0	0.0	0.0	0.0	0.0	0.0	0.0	0.0	0.0	0.0	0.0	0.0	38.0	0.0	0.0
OTU 1773	0.0	0.0	0.0	0.0	0.0	0.0	0.0	0.0	0.0	0.0	0.0	0.0	0.0	0.0	0.0	0.0	0.0	0.0	0.0	0.0	0.0	0.0	0.0	0.0	0.0	0.0	0.0	0.0	38.0	0.0	0.0
OTU 1774	37.0	0.0	0.0	0.0	0.0	0.0	0.0	0.0	0.0	0.0	0.0	0.0	0.0	0.0	0.0	0.0	0.0	0.0	0.0	0.0	0.0	0.0	0.0	0.0	0.0	0.0	0.0	0.0	0.0	0.0	0.0
OTU 1775	0.0	0.0	0.0	37.0	0.0	0.0	0.0	0.0	0.0	0.0	0.0	0.0	0.0	0.0	0.0	0.0	0.0	0.0	0.0	0.0	0.0	0.0	0.0	0.0	0.0	0.0	0.0	0.0	0.0	0.0	0.0
OTU 1776	0.0	0.0	0.0	37.0	0.0	0.0	0.0	0.0	0.0	0.0	0.0	0.0	0.0	0.0	0.0	0.0	0.0	0.0	0.0	0.0	0.0	0.0	0.0	0.0	0.0	0.0	0.0	0.0	0.0	0.0	0.0
OTU 1777	0.0	0.0	0.0	0.0	37.0	0.0	0.0	0.0	0.0	0.0	0.0	0.0	0.0	0.0	0.0	0.0	0.0	0.0	0.0	0.0	0.0	0.0	0.0	0.0	0.0	0.0	0.0	0.0	0.0	0.0	0.0
OTU 1778	0.0	0.0	0.0	0.0	0.0	0.0	37.0	0.0	0.0	0.0	0.0	0.0	0.0	0.0	0.0	0.0	0.0	0.0	0.0	0.0	0.0	0.0	0.0	0.0	0.0	0.0	0.0	0.0	0.0	0.0	0.0
OTU 1779	0.0	0.0	0.0	0.0	0.0	0.0	0.0	15.0	0.0	0.0	0.0	0.0	0.0	0.0	0.0	0.0	0.0	0.0	0.0	0.0	0.0	0.0	0.0	0.0	0.0	0.0	0.0	22.0	0.0	0.0	0.0
OTU 1780	0.0	0.0	0.0	0.0	0.0	0.0	0.0	0.0	37.0	0.0	0.0	0.0	0.0	0.0	0.0	0.0	0.0	0.0	0.0	0.0	0.0	0.0	0.0	0.0	0.0	0.0	0.0	0.0	0.0	0.0	0.0
OTU 1781	0.0	0.0	0.0	0.0	0.0	0.0	0.0	0.0	37.0	0.0	0.0	0.0	0.0	0.0	0.0	0.0	0.0	0.0	0.0	0.0	0.0	0.0	0.0	0.0	0.0	0.0	0.0	0.0	0.0	0.0	0.0
OTU 1782	0.0	0.0	0.0	0.0	0.0	0.0	0.0	0.0	0.0	20.0	7.0	0.0	0.0	0.0	0.0	0.0	0.0	0.0	0.0	0.0	0.0	0.0	0.0	10.0	0.0	0.0	0.0	0.0	0.0	0.0	0.0
OTU 1783	0.0	0.0	0.0	0.0	0.0	0.0	0.0	0.0	0.0	0.0	37.0	0.0	0.0	0.0	0.0	0.0	0.0	0.0	0.0	0.0	0.0	0.0	0.0	0.0	0.0	0.0	0.0	0.0	0.0	0.0	0.0
OTU 1784	0.0	0.0	0.0	0.0	0.0	0.0	0.0	0.0	0.0	0.0	0.0	37.0	0.0	0.0	0.0	0.0	0.0	0.0	0.0	0.0	0.0	0.0	0.0	0.0	0.0	0.0	0.0	0.0	0.0	0.0	0.0
OTU 1785	0.0	0.0	0.0	0.0	0.0	0.0	0.0	0.0	0.0	0.0	0.0	37.0	0.0	0.0	0.0	0.0	0.0	0.0	0.0	0.0	0.0	0.0	0.0	0.0	0.0	0.0	0.0	0.0	0.0	0.0	0.0
OTU 1786	0.0	0.0	0.0	0.0	0.0	0.0	0.0	0.0	0.0	0.0	0.0	0.0	0.0	37.0	0.0	0.0	0.0	0.0	0.0	0.0	0.0	0.0	0.0	0.0	0.0	0.0	0.0	0.0	0.0	0.0	0.0
OTU 1787	0.0	0.0	0.0	0.0	0.0	0.0	0.0	0.0	0.0	0.0	0.0	0.0	0.0	37.0	0.0	0.0	0.0	0.0	0.0	0.0	0.0	0.0	0.0	0.0	0.0	0.0	0.0	0.0	0.0	0.0	0.0
OTU 1788	0.0	0.0	0.0	0.0	0.0	0.0	0.0	0.0	0.0	0.0	0.0	0.0	0.0	0.0	37.0	0.0	0.0	0.0	0.0	0.0	0.0	0.0	0.0	0.0	0.0	0.0	0.0	0.0	0.0	0.0	0.0
OTU 1789	0.0	0.0	0.0	0.0	0.0	0.0	0.0	0.0	0.0	0.0	0.0	0.0	0.0	0.0	37.0	0.0	0.0	0.0	0.0	0.0	0.0	0.0	0.0	0.0	0.0	0.0	0.0	0.0	0.0	0.0	0.0
OTU 1790	0.0	0.0	0.0	0.0	0.0	0.0	0.0	0.0	0.0	0.0	0.0	0.0	0.0	0.0	0.0	0.0	0.0	0.0	0.0	0.0	37.0	0.0	0.0	0.0	0.0	0.0	0.0	0.0	0.0	0.0	0.0
OTU 1791	0.0	0.0	0.0	0.0	0.0	0.0	0.0	0.0	0.0	0.0	0.0	0.0	0.0	0.0	0.0	0.0	0.0	0.0	0.0	0.0	0.0	0.0	0.0	0.0	0.0	0.0	37.0	0.0	0.0	0.0	0.0
OTU 1792	0.0	0.0	0.0	0.0	0.0	0.0	0.0	0.0	0.0	0.0	0.0	0.0	0.0	0.0	0.0	0.0	0.0	0.0	0.0	0.0	0.0	0.0	0.0	0.0	0.0	0.0	0.0	37.0	0.0	0.0	0.0
OTU 1793	0.0	0.0	0.0	0.0	0.0	0.0	0.0	0.0	0.0	0.0	0.0	0.0	0.0	0.0	0.0	0.0	0.0	0.0	0.0	0.0	0.0	0.0	0.0	0.0	0.0	0.0	0.0	0.0	0.0	0.0	37.0
OTU 1794	0.0	0.0	36.0	0.0	0.0	0.0	0.0	0.0	0.0	0.0	0.0	0.0	0.0	0.0	0.0	0.0	0.0	0.0	0.0	0.0	0.0	0.0	0.0	0.0	0.0	0.0	0.0	0.0	0.0	0.0	0.0
OTU 1795	0.0	0.0	0.0	0.0	36.0	0.0	0.0	0.0	0.0	0.0	0.0	0.0	0.0	0.0	0.0	0.0	0.0	0.0	0.0	0.0	0.0	0.0	0.0	0.0	0.0	0.0	0.0	0.0	0.0	0.0	0.0
OTU 1796	0.0	0.0	0.0	0.0	36.0	0.0	0.0	0.0	0.0	0.0	0.0	0.0	0.0	0.0	0.0	0.0	0.0	0.0	0.0	0.0	0.0	0.0	0.0	0.0	0.0	0.0	0.0	0.0	0.0	0.0	0.0
OTU 1797	0.0	0.0	0.0	0.0	36.0	0.0	0.0	0.0	0.0	0.0	0.0	0.0	0.0	0.0	0.0	0.0	0.0	0.0	0.0	0.0	0.0	0.0	0.0	0.0	0.0	0.0	0.0	0.0	0.0	0.0	0.0
OTU 1798	0.0	0.0	0.0	0.0	36.0	0.0	0.0	0.0	0.0	0.0	0.0	0.0	0.0	0.0	0.0	0.0	0.0	0.0	0.0	0.0	0.0	0.0	0.0	0.0	0.0	0.0	0.0	0.0	0.0	0.0	0.0
OTU 1799	0.0	0.0	0.0	0.0	4.0	0.0	0.0	0.0	0.0	0.0	0.0	0.0	0.0	0.0	0.0	0.0	0.0	0.0	0.0	0.0	0.0	0.0	0.0	0.0	32.0	0.0	0.0	0.0	0.0	0.0	0.0
OTU 1800	0.0	0.0	0.0	0.0	0.0	6.0	0.0	24.0	1.0	0.0	0.0	0.0	1.0	4.0	0.0	0.0	0.0	0.0	0.0	0.0	0.0	0.0	0.0	0.0	0.0	0.0	0.0	0.0	0.0	0.0	0.0
OTU 1801	0.0	0.0	0.0	0.0	0.0	0.0	36.0	0.0	0.0	0.0	0.0	0.0	0.0	0.0	0.0	0.0	0.0	0.0	0.0	0.0	0.0	0.0	0.0	0.0	0.0	0.0	0.0	0.0	0.0	0.0	0.0
OTU 1802	0.0	0.0	0.0	0.0	0.0	0.0	36.0	0.0	0.0	0.0	0.0	0.0	0.0	0.0	0.0	0.0	0.0	0.0	0.0	0.0	0.0	0.0	0.0	0.0	0.0	0.0	0.0	0.0	0.0	0.0	0.0
OTU 1803	0.0	0.0	0.0	0.0	0.0	0.0	36.0	0.0	0.0	0.0	0.0	0.0	0.0	0.0	0.0	0.0	0.0	0.0	0.0	0.0	0.0	0.0	0.0	0.0	0.0	0.0	0.0	0.0	0.0	0.0	0.0
OTU 1804	0.0	0.0	0.0	0.0	0.0	0.0	0.0	0.0	36.0	0.0	0.0	0.0	0.0	0.0	0.0	0.0	0.0	0.0	0.0	0.0	0.0	0.0	0.0	0.0	0.0	0.0	0.0	0.0	0.0	0.0	0.0
OTU 1805	0.0	0.0	0.0	0.0	0.0	0.0	0.0	0.0	0.0	0.0	0.0	0.0	0.0	36.0	0.0	0.0	0.0	0.0	0.0	0.0	0.0	0.0	0.0	0.0	0.0	0.0	0.0	0.0	0.0	0.0	0.0
OTU 1806	0.0	0.0	0.0	0.0	0.0	0.0	0.0	0.0	0.0	0.0	0.0	0.0	0.0	0.0	36.0	0.0	0.0	0.0	0.0	0.0	0.0	0.0	0.0	0.0	0.0	0.0	0.0	0.0	0.0	0.0	0.0
OTU 1807	0.0	0.0	0.0	0.0	0.0	0.0	0.0	0.0	0.0	0.0	0.0	0.0	0.0	0.0	0.0	0.0	0.0	0.0	0.0	36.0	0.0	0.0	0.0	0.0	0.0	0.0	0.0	0.0	0.0	0.0	0.0
OTU 1808	0.0	0.0	0.0	0.0	0.0	0.0	0.0	0.0	0.0	0.0	0.0	0.0	0.0	0.0	0.0	0.0	0.0	0.0	0.0	0.0	0.0	0.0	0.0	0.0	0.0	36.0	0.0	0.0	0.0	0.0	0.0
OTU 1809	0.0	0.0	0.0	0.0	0.0	0.0	0.0	0.0	0.0	0.0	0.0	0.0	0.0	0.0	0.0	0.0	0.0	0.0	0.0	0.0	0.0	0.0	0.0	0.0	0.0	0.0	36.0	0.0	0.0	0.0	0.0
OTU 1810	0.0	0.0	0.0	0.0	0.0	0.0	0.0	0.0	0.0	0.0	0.0	0.0	0.0	0.0	0.0	0.0	0.0	0.0	0.0	0.0	0.0	0.0	0.0	0.0	0.0	0.0	36.0	0.0	0.0	0.0	0.0
OTU 1811	0.0	0.0	0.0	0.0	0.0	0.0	0.0	0.0	0.0	0.0	0.0	0.0	0.0	0.0	0.0	0.0	0.0	0.0	0.0	0.0	0.0	0.0	0.0	0.0	0.0	0.0	0.0	0.0	0.0	36.0	0.0
OTU 1812	35.0	0.0	0.0	0.0	0.0	0.0	0.0	0.0	0.0	0.0	0.0	0.0	0.0	0.0	0.0	0.0	0.0	0.0	0.0	0.0	0.0	0.0	0.0	0.0	0.0	0.0	0.0	0.0	0.0	0.0	0.0
OTU 1813	35.0	0.0	0.0	0.0	0.0	0.0	0.0	0.0	0.0	0.0	0.0	0.0	0.0	0.0	0.0	0.0	0.0	0.0	0.0	0.0	0.0	0.0	0.0	0.0	0.0	0.0	0.0	0.0	0.0	0.0	0.0
OTU 1814	35.0	0.0	0.0	0.0	0.0	0.0	0.0	0.0	0.0	0.0	0.0	0.0	0.0	0.0	0.0	0.0	0.0	0.0	0.0	0.0	0.0	0.0	0.0	0.0	0.0	0.0	0.0	0.0	0.0	0.0	0.0
OTU 1815	0.0	35.0	0.0	0.0	0.0	0.0	0.0	0.0	0.0	0.0	0.0	0.0	0.0	0.0	0.0	0.0	0.0	0.0	0.0	0.0	0.0	0.0	0.0	0.0	0.0	0.0	0.0	0.0	0.0	0.0	0.0
OTU 1816	0.0	0.0	35.0	0.0	0.0	0.0	0.0	0.0	0.0	0.0	0.0	0.0	0.0	0.0	0.0	0.0	0.0	0.0	0.0	0.0	0.0	0.0	0.0	0.0	0.0	0.0	0.0	0.0	0.0	0.0	0.0
OTU 1817	0.0	0.0	0.0	0.0	35.0	0.0	0.0	0.0	0.0	0.0	0.0	0.0	0.0	0.0	0.0	0.0	0.0	0.0	0.0	0.0	0.0	0.0	0.0	0.0	0.0	0.0	0.0	0.0	0.0	0.0	0.0
OTU 1818	0.0	0.0	0.0	0.0	35.0	0.0	0.0	0.0	0.0	0.0	0.0	0.0	0.0	0.0	0.0	0.0	0.0	0.0	0.0	0.0	0.0	0.0	0.0	0.0	0.0	0.0	0.0	0.0	0.0	0.0	0.0
OTU 1819	0.0	0.0	0.0	0.0	16.0	0.0	10.0	0.0	0.0	0.0	9.0	0.0	0.0	0.0	0.0	0.0	0.0	0.0	0.0	0.0	0.0	0.0	0.0	0.0	0.0	0.0	0.0	0.0	0.0	0.0	0.0
OTU 1820	0.0	0.0	0.0	0.0	0.0	35.0	0.0	0.0	0.0	0.0	0.0	0.0	0.0	0.0	0.0	0.0	0.0	0.0	0.0	0.0	0.0	0.0	0.0	0.0	0.0	0.0	0.0	0.0	0.0	0.0	0.0
OTU 1821	0.0	0.0	0.0	0.0	0.0	0.0	35.0	0.0	0.0	0.0	0.0	0.0	0.0	0.0	0.0	0.0	0.0	0.0	0.0	0.0	0.0	0.0	0.0	0.0	0.0	0.0	0.0	0.0	0.0	0.0	0.0
OTU 1822	0.0	0.0	0.0	0.0	0.0	0.0	35.0	0.0	0.0	0.0	0.0	0.0	0.0	0.0	0.0	0.0	0.0	0.0	0.0	0.0	0.0	0.0	0.0	0.0	0.0	0.0	0.0	0.0	0.0	0.0	0.0
OTU 1823	0.0	0.0	0.0	0.0	0.0	0.0	35.0	0.0	0.0	0.0	0.0	0.0	0.0	0.0	0.0	0.0	0.0	0.0	0.0	0.0	0.0	0.0	0.0	0.0	0.0	0.0	0.0	0.0	0.0	0.0	0.0
OTU 1824	0.0	0.0	0.0	0.0	0.0	0.0	0.0	0.0	35.0	0.0	0.0	0.0	0.0	0.0	0.0	0.0	0.0	0.0	0.0	0.0	0.0	0.0	0.0	0.0	0.0	0.0	0.0	0.0	0.0	0.0	0.0
OTU 1825	0.0	0.0	0.0	0.0	0.0	0.0	0.0	0.0	0.0	35.0	0.0	0.0	0.0	0.0	0.0	0.0	0.0	0.0	0.0	0.0	0.0	0.0	0.0	0.0	0.0	0.0	0.0	0.0	0.0	0.0	0.0
OTU 1826	0.0	0.0	0.0	0.0	0.0	0.0	0.0	0.0	0.0	35.0	0.0	0.0	0.0	0.0	0.0	0.0	0.0	0.0	0.0	0.0	0.0	0.0	0.0	0.0	0.0	0.0	0.0	0.0	0.0	0.0	0.0
OTU 1827	0.0	0.0	0.0	0.0	0.0	0.0	0.0	0.0	0.0	0.0	35.0	0.0	0.0	0.0	0.0	0.0	0.0	0.0	0.0	0.0	0.0	0.0	0.0	0.0	0.0	0.0	0.0	0.0	0.0	0.0	0.0
OTU 1828	0.0	0.0	0.0	0.0	0.0	0.0	0.0	0.0	0.0	0.0	0.0	0.0	35.0	0.0	0.0	0.0	0.0	0.0	0.0	0.0	0.0	0.0	0.0	0.0	0.0	0.0	0.0	0.0	0.0	0.0	0.0
OTU 1829	0.0	0.0	0.0	0.0	0.0	0.0	0.0	0.0	0.0	0.0	0.0	0.0	5.0	0.0	0.0	0.0	0.0	0.0	0.0	0.0	0.0	0.0	0.0	0.0	0.0	30.0	0.0	0.0	0.0	0.0	0.0
OTU 1830	0.0	0.0	0.0	0.0	0.0	0.0	0.0	0.0	0.0	0.0	0.0	0.0	0.0	0.0	0.0	0.0	35.0	0.0	0.0	0.0	0.0	0.0	0.0	0.0	0.0	0.0	0.0	0.0	0.0	0.0	0.0
OTU 1831	0.0	0.0	0.0	0.0	0.0	0.0	0.0	0.0	0.0	0.0	0.0	0.0	0.0	0.0	0.0	0.0	0.0	0.0	35.0	0.0	0.0	0.0	0.0	0.0	0.0	0.0	0.0	0.0	0.0	0.0	0.0
OTU 1832	0.0	0.0	0.0	0.0	0.0	0.0	0.0	0.0	0.0	0.0	0.0	0.0	0.0	0.0	0.0	0.0	0.0	0.0	0.0	0.0	35.0	0.0	0.0	0.0	0.0	0.0	0.0	0.0	0.0	0.0	0.0
OTU 1833	0.0	0.0	0.0	0.0	0.0	0.0	0.0	0.0	0.0	0.0	0.0	0.0	0.0	0.0	0.0	0.0	0.0	0.0	0.0	0.0	35.0	0.0	0.0	0.0	0.0	0.0	0.0	0.0	0.0	0.0	0.0
OTU 1834	0.0	0.0	0.0	0.0	0.0	0.0	0.0	0.0	0.0	0.0	0.0	0.0	0.0	0.0	0.0	0.0	0.0	0.0	0.0	0.0	35.0	0.0	0.0	0.0	0.0	0.0	0.0	0.0	0.0	0.0	0.0
OTU 1835	0.0	0.0	0.0	0.0	0.0	0.0	0.0	0.0	0.0	0.0	0.0	0.0	0.0	0.0	0.0	0.0	0.0	0.0	0.0	0.0	0.0	0.0	35.0	0.0	0.0	0.0	0.0	0.0	0.0	0.0	0.0
OTU 1836	0.0	0.0	0.0	0.0	0.0	0.0	0.0	0.0	0.0	0.0	0.0	0.0	0.0	0.0	0.0	0.0	0.0	0.0	0.0	0.0	0.0	0.0	35.0	0.0	0.0	0.0	0.0	0.0	0.0	0.0	0.0
OTU 1837	0.0	0.0	0.0	0.0	0.0	0.0	0.0	0.0	0.0	0.0	0.0	0.0	0.0	0.0	0.0	0.0	0.0	0.0	0.0	0.0	0.0	0.0	0.0	35.0	0.0	0.0	0.0	0.0	0.0	0.0	0.0
OTU 1838	0.0	0.0	0.0	0.0	0.0	0.0	0.0	0.0	0.0	0.0	0.0	0.0	0.0	0.0	0.0	0.0	0.0	0.0	0.0	0.0	0.0	0.0	0.0	0.0	0.0	0.0	17.0	0.0	0.0	0.0	18.0
OTU 1839	0.0	0.0	0.0	0.0	0.0	0.0	0.0	0.0	0.0	0.0	0.0	0.0	0.0	0.0	0.0	0.0	0.0	0.0	0.0	0.0	0.0	0.0	0.0	0.0	0.0	0.0	0.0	0.0	0.0	35.0	0.0
OTU 1840	0.0	0.0	0.0	0.0	0.0	0.0	0.0	0.0	0.0	0.0	0.0	0.0	0.0	0.0	0.0	0.0	0.0	0.0	0.0	0.0	0.0	0.0	0.0	0.0	0.0	0.0	0.0	0.0	0.0	35.0	0.0
OTU 1841	0.0	0.0	0.0	0.0	0.0	0.0	0.0	0.0	0.0	0.0	0.0	0.0	0.0	0.0	0.0	0.0	0.0	0.0	0.0	0.0	0.0	0.0	0.0	0.0	0.0	0.0	0.0	0.0	0.0	35.0	0.0
OTU 1842	0.0	0.0	0.0	0.0	0.0	0.0	0.0	0.0	0.0	0.0	0.0	0.0	0.0	0.0	0.0	0.0	0.0	0.0	0.0	0.0	0.0	0.0	0.0	0.0	0.0	0.0	0.0	0.0	0.0	0.0	35.0
OTU 1843	0.0	0.0	0.0	0.0	0.0	0.0	0.0	0.0	0.0	0.0	0.0	0.0	0.0	0.0	0.0	0.0	0.0	0.0	0.0	0.0	0.0	0.0	0.0	0.0	0.0	0.0	0.0	0.0	0.0	0.0	35.0
OTU 1844	0.0	0.0	34.0	0.0	0.0	0.0	0.0	0.0	0.0	0.0	0.0	0.0	0.0	0.0	0.0	0.0	0.0	0.0	0.0	0.0	0.0	0.0	0.0	0.0	0.0	0.0	0.0	0.0	0.0	0.0	0.0
OTU 1845	0.0	0.0	8.0	26.0	0.0	0.0	0.0	0.0	0.0	0.0	0.0	0.0	0.0	0.0	0.0	0.0	0.0	0.0	0.0	0.0	0.0	0.0	0.0	0.0	0.0	0.0	0.0	0.0	0.0	0.0	0.0
OTU 1846	0.0	0.0	0.0	0.0	34.0	0.0	0.0	0.0	0.0	0.0	0.0	0.0	0.0	0.0	0.0	0.0	0.0	0.0	0.0	0.0	0.0	0.0	0.0	0.0	0.0	0.0	0.0	0.0	0.0	0.0	0.0
OTU 1847	0.0	0.0	0.0	0.0	34.0	0.0	0.0	0.0	0.0	0.0	0.0	0.0	0.0	0.0	0.0	0.0	0.0	0.0	0.0	0.0	0.0	0.0	0.0	0.0	0.0	0.0	0.0	0.0	0.0	0.0	0.0
OTU 1848	0.0	0.0	0.0	0.0	16.0	0.0	0.0	0.0	0.0	0.0	0.0	0.0	0.0	0.0	0.0	0.0	0.0	0.0	0.0	0.0	0.0	0.0	0.0	0.0	0.0	11.0	0.0	7.0	0.0	0.0	0.0
OTU 1849	0.0	0.0	0.0	0.0	0.0	34.0	0.0	0.0	0.0	0.0	0.0	0.0	0.0	0.0	0.0	0.0	0.0	0.0	0.0	0.0	0.0	0.0	0.0	0.0	0.0	0.0	0.0	0.0	0.0	0.0	0.0
OTU 1850	0.0	0.0	0.0	0.0	0.0	0.0	0.0	34.0	0.0	0.0	0.0	0.0	0.0	0.0	0.0	0.0	0.0	0.0	0.0	0.0	0.0	0.0	0.0	0.0	0.0	0.0	0.0	0.0	0.0	0.0	0.0
OTU 1851	0.0	0.0	0.0	0.0	0.0	0.0	0.0	34.0	0.0	0.0	0.0	0.0	0.0	0.0	0.0	0.0	0.0	0.0	0.0	0.0	0.0	0.0	0.0	0.0	0.0	0.0	0.0	0.0	0.0	0.0	0.0
OTU 1852	0.0	0.0	0.0	0.0	0.0	0.0	0.0	0.0	34.0	0.0	0.0	0.0	0.0	0.0	0.0	0.0	0.0	0.0	0.0	0.0	0.0	0.0	0.0	0.0	0.0	0.0	0.0	0.0	0.0	0.0	0.0
OTU 1853	0.0	0.0	0.0	0.0	0.0	0.0	0.0	0.0	34.0	0.0	0.0	0.0	0.0	0.0	0.0	0.0	0.0	0.0	0.0	0.0	0.0	0.0	0.0	0.0	0.0	0.0	0.0	0.0	0.0	0.0	0.0
OTU 1854	0.0	0.0	0.0	0.0	0.0	0.0	0.0	0.0	0.0	34.0	0.0	0.0	0.0	0.0	0.0	0.0	0.0	0.0	0.0	0.0	0.0	0.0	0.0	0.0	0.0	0.0	0.0	0.0	0.0	0.0	0.0
OTU 1855	0.0	0.0	0.0	0.0	0.0	0.0	0.0	0.0	0.0	34.0	0.0	0.0	0.0	0.0	0.0	0.0	0.0	0.0	0.0	0.0	0.0	0.0	0.0	0.0	0.0	0.0	0.0	0.0	0.0	0.0	0.0
OTU 1856	0.0	0.0	0.0	0.0	0.0	0.0	0.0	0.0	0.0	0.0	34.0	0.0	0.0	0.0	0.0	0.0	0.0	0.0	0.0	0.0	0.0	0.0	0.0	0.0	0.0	0.0	0.0	0.0	0.0	0.0	0.0
OTU 1857	0.0	0.0	0.0	0.0	0.0	0.0	0.0	0.0	0.0	0.0	0.0	34.0	0.0	0.0	0.0	0.0	0.0	0.0	0.0	0.0	0.0	0.0	0.0	0.0	0.0	0.0	0.0	0.0	0.0	0.0	0.0
OTU 1858	0.0	0.0	0.0	0.0	0.0	0.0	0.0	0.0	0.0	0.0	0.0	34.0	0.0	0.0	0.0	0.0	0.0	0.0	0.0	0.0	0.0	0.0	0.0	0.0	0.0	0.0	0.0	0.0	0.0	0.0	0.0
OTU 1859	0.0	0.0	0.0	0.0	0.0	0.0	0.0	0.0	0.0	0.0	0.0	0.0	34.0	0.0	0.0	0.0	0.0	0.0	0.0	0.0	0.0	0.0	0.0	0.0	0.0	0.0	0.0	0.0	0.0	0.0	0.0
OTU 1860	0.0	0.0	0.0	0.0	0.0	0.0	0.0	0.0	0.0	0.0	0.0	0.0	0.0	34.0	0.0	0.0	0.0	0.0	0.0	0.0	0.0	0.0	0.0	0.0	0.0	0.0	0.0	0.0	0.0	0.0	0.0
OTU 1861	0.0	0.0	0.0	0.0	0.0	0.0	0.0	0.0	0.0	0.0	0.0	0.0	0.0	34.0	0.0	0.0	0.0	0.0	0.0	0.0	0.0	0.0	0.0	0.0	0.0	0.0	0.0	0.0	0.0	0.0	0.0
OTU 1862	0.0	0.0	0.0	0.0	0.0	0.0	0.0	0.0	0.0	0.0	0.0	0.0	0.0	0.0	34.0	0.0	0.0	0.0	0.0	0.0	0.0	0.0	0.0	0.0	0.0	0.0	0.0	0.0	0.0	0.0	0.0
OTU 1863	0.0	0.0	0.0	0.0	0.0	0.0	0.0	0.0	0.0	0.0	0.0	0.0	0.0	0.0	0.0	0.0	0.0	0.0	11.0	0.0	0.0	0.0	0.0	0.0	0.0	0.0	0.0	23.0	0.0	0.0	0.0
OTU 1864	0.0	0.0	0.0	0.0	0.0	0.0	0.0	0.0	0.0	0.0	0.0	0.0	0.0	0.0	0.0	0.0	0.0	0.0	0.0	0.0	34.0	0.0	0.0	0.0	0.0	0.0	0.0	0.0	0.0	0.0	0.0
OTU 1865	0.0	0.0	0.0	0.0	0.0	0.0	0.0	0.0	0.0	0.0	0.0	0.0	0.0	0.0	0.0	0.0	0.0	0.0	0.0	0.0	0.0	34.0	0.0	0.0	0.0	0.0	0.0	0.0	0.0	0.0	0.0
OTU 1866	0.0	0.0	0.0	0.0	0.0	0.0	0.0	0.0	0.0	0.0	0.0	0.0	0.0	0.0	0.0	0.0	0.0	0.0	0.0	0.0	0.0	34.0	0.0	0.0	0.0	0.0	0.0	0.0	0.0	0.0	0.0
OTU 1867	0.0	0.0	0.0	0.0	0.0	0.0	0.0	0.0	0.0	0.0	0.0	0.0	0.0	0.0	0.0	0.0	0.0	0.0	0.0	0.0	0.0	0.0	0.0	34.0	0.0	0.0	0.0	0.0	0.0	0.0	0.0
OTU 1868	0.0	0.0	0.0	0.0	0.0	0.0	0.0	0.0	0.0	0.0	0.0	0.0	0.0	0.0	0.0	0.0	0.0	0.0	0.0	0.0	0.0	0.0	0.0	0.0	34.0	0.0	0.0	0.0	0.0	0.0	0.0
OTU 1869	0.0	0.0	0.0	0.0	0.0	0.0	0.0	0.0	0.0	0.0	0.0	0.0	0.0	0.0	0.0	0.0	0.0	0.0	0.0	0.0	0.0	0.0	0.0	0.0	34.0	0.0	0.0	0.0	0.0	0.0	0.0
OTU 1870	0.0	0.0	0.0	0.0	0.0	0.0	0.0	0.0	0.0	0.0	0.0	0.0	0.0	0.0	0.0	0.0	0.0	0.0	0.0	0.0	0.0	0.0	0.0	0.0	0.0	34.0	0.0	0.0	0.0	0.0	0.0
OTU 1871	0.0	0.0	0.0	0.0	0.0	0.0	0.0	0.0	0.0	0.0	0.0	0.0	0.0	0.0	0.0	0.0	0.0	0.0	0.0	0.0	0.0	0.0	0.0	0.0	0.0	34.0	0.0	0.0	0.0	0.0	0.0
OTU 1872	0.0	0.0	0.0	0.0	0.0	0.0	0.0	0.0	0.0	0.0	0.0	0.0	0.0	0.0	0.0	0.0	0.0	0.0	0.0	0.0	0.0	0.0	0.0	0.0	0.0	0.0	0.0	0.0	0.0	0.0	34.0
OTU 1873	0.0	0.0	0.0	0.0	33.0	0.0	0.0	0.0	0.0	0.0	0.0	0.0	0.0	0.0	0.0	0.0	0.0	0.0	0.0	0.0	0.0	0.0	0.0	0.0	0.0	0.0	0.0	0.0	0.0	0.0	0.0
OTU 1874	0.0	0.0	0.0	0.0	23.0	0.0	0.0	0.0	0.0	0.0	0.0	0.0	0.0	0.0	10.0	0.0	0.0	0.0	0.0	0.0	0.0	0.0	0.0	0.0	0.0	0.0	0.0	0.0	0.0	0.0	0.0
OTU 1875	0.0	0.0	0.0	0.0	0.0	33.0	0.0	0.0	0.0	0.0	0.0	0.0	0.0	0.0	0.0	0.0	0.0	0.0	0.0	0.0	0.0	0.0	0.0	0.0	0.0	0.0	0.0	0.0	0.0	0.0	0.0
OTU 1876	0.0	0.0	0.0	0.0	0.0	0.0	33.0	0.0	0.0	0.0	0.0	0.0	0.0	0.0	0.0	0.0	0.0	0.0	0.0	0.0	0.0	0.0	0.0	0.0	0.0	0.0	0.0	0.0	0.0	0.0	0.0
OTU 1877	0.0	0.0	0.0	0.0	0.0	0.0	33.0	0.0	0.0	0.0	0.0	0.0	0.0	0.0	0.0	0.0	0.0	0.0	0.0	0.0	0.0	0.0	0.0	0.0	0.0	0.0	0.0	0.0	0.0	0.0	0.0
OTU 1878	0.0	0.0	0.0	0.0	0.0	0.0	0.0	33.0	0.0	0.0	0.0	0.0	0.0	0.0	0.0	0.0	0.0	0.0	0.0	0.0	0.0	0.0	0.0	0.0	0.0	0.0	0.0	0.0	0.0	0.0	0.0
OTU 1879	0.0	0.0	0.0	0.0	0.0	0.0	0.0	0.0	0.0	0.0	33.0	0.0	0.0	0.0	0.0	0.0	0.0	0.0	0.0	0.0	0.0	0.0	0.0	0.0	0.0	0.0	0.0	0.0	0.0	0.0	0.0
OTU 1880	0.0	0.0	0.0	0.0	0.0	0.0	0.0	0.0	0.0	0.0	0.0	33.0	0.0	0.0	0.0	0.0	0.0	0.0	0.0	0.0	0.0	0.0	0.0	0.0	0.0	0.0	0.0	0.0	0.0	0.0	0.0
OTU 1881	0.0	0.0	0.0	0.0	0.0	0.0	0.0	0.0	0.0	0.0	0.0	0.0	33.0	0.0	0.0	0.0	0.0	0.0	0.0	0.0	0.0	0.0	0.0	0.0	0.0	0.0	0.0	0.0	0.0	0.0	0.0
OTU 1882	0.0	0.0	0.0	0.0	0.0	0.0	0.0	0.0	0.0	0.0	0.0	0.0	0.0	0.0	33.0	0.0	0.0	0.0	0.0	0.0	0.0	0.0	0.0	0.0	0.0	0.0	0.0	0.0	0.0	0.0	0.0
OTU 1883	0.0	0.0	0.0	0.0	0.0	0.0	0.0	0.0	0.0	0.0	0.0	0.0	0.0	0.0	33.0	0.0	0.0	0.0	0.0	0.0	0.0	0.0	0.0	0.0	0.0	0.0	0.0	0.0	0.0	0.0	0.0
OTU 1884	0.0	0.0	0.0	0.0	0.0	0.0	0.0	0.0	0.0	0.0	0.0	0.0	0.0	0.0	33.0	0.0	0.0	0.0	0.0	0.0	0.0	0.0	0.0	0.0	0.0	0.0	0.0	0.0	0.0	0.0	0.0
OTU 1885	0.0	0.0	0.0	0.0	0.0	0.0	0.0	0.0	0.0	0.0	0.0	0.0	0.0	0.0	0.0	0.0	0.0	0.0	0.0	0.0	0.0	0.0	33.0	0.0	0.0	0.0	0.0	0.0	0.0	0.0	0.0
OTU 1886	0.0	0.0	0.0	0.0	0.0	0.0	0.0	0.0	0.0	0.0	0.0	0.0	0.0	0.0	0.0	0.0	0.0	0.0	0.0	0.0	0.0	0.0	33.0	0.0	0.0	0.0	0.0	0.0	0.0	0.0	0.0
OTU 1887	0.0	0.0	0.0	0.0	0.0	0.0	0.0	0.0	0.0	0.0	0.0	0.0	0.0	0.0	0.0	0.0	0.0	0.0	0.0	0.0	0.0	0.0	0.0	0.0	33.0	0.0	0.0	0.0	0.0	0.0	0.0
OTU 1888	0.0	0.0	0.0	0.0	0.0	0.0	0.0	0.0	0.0	0.0	0.0	0.0	0.0	0.0	0.0	0.0	0.0	0.0	0.0	0.0	0.0	0.0	0.0	0.0	0.0	33.0	0.0	0.0	0.0	0.0	0.0
OTU 1889	0.0	0.0	0.0	0.0	0.0	0.0	0.0	0.0	0.0	0.0	0.0	0.0	0.0	0.0	0.0	0.0	0.0	0.0	0.0	0.0	0.0	0.0	0.0	0.0	0.0	0.0	0.0	33.0	0.0	0.0	0.0
OTU 1890	0.0	0.0	0.0	0.0	0.0	0.0	0.0	0.0	0.0	0.0	0.0	0.0	0.0	0.0	0.0	0.0	0.0	0.0	0.0	0.0	0.0	0.0	0.0	0.0	0.0	0.0	0.0	0.0	0.0	0.0	33.0
OTU 1891	0.0	0.0	0.0	0.0	0.0	0.0	0.0	0.0	0.0	0.0	0.0	0.0	0.0	0.0	0.0	0.0	0.0	0.0	0.0	0.0	0.0	0.0	0.0	0.0	0.0	0.0	0.0	0.0	0.0	0.0	33.0
OTU 1892	32.0	0.0	0.0	0.0	0.0	0.0	0.0	0.0	0.0	0.0	0.0	0.0	0.0	0.0	0.0	0.0	0.0	0.0	0.0	0.0	0.0	0.0	0.0	0.0	0.0	0.0	0.0	0.0	0.0	0.0	0.0
OTU 1893	0.0	32.0	0.0	0.0	0.0	0.0	0.0	0.0	0.0	0.0	0.0	0.0	0.0	0.0	0.0	0.0	0.0	0.0	0.0	0.0	0.0	0.0	0.0	0.0	0.0	0.0	0.0	0.0	0.0	0.0	0.0
OTU 1894	0.0	17.0	0.0	0.0	0.0	0.0	0.0	0.0	0.0	0.0	0.0	0.0	0.0	0.0	0.0	0.0	0.0	0.0	15.0	0.0	0.0	0.0	0.0	0.0	0.0	0.0	0.0	0.0	0.0	0.0	0.0
OTU 1895	0.0	0.0	0.0	32.0	0.0	0.0	0.0	0.0	0.0	0.0	0.0	0.0	0.0	0.0	0.0	0.0	0.0	0.0	0.0	0.0	0.0	0.0	0.0	0.0	0.0	0.0	0.0	0.0	0.0	0.0	0.0
OTU 1896	0.0	0.0	0.0	0.0	32.0	0.0	0.0	0.0	0.0	0.0	0.0	0.0	0.0	0.0	0.0	0.0	0.0	0.0	0.0	0.0	0.0	0.0	0.0	0.0	0.0	0.0	0.0	0.0	0.0	0.0	0.0
OTU 1897	0.0	0.0	0.0	0.0	32.0	0.0	0.0	0.0	0.0	0.0	0.0	0.0	0.0	0.0	0.0	0.0	0.0	0.0	0.0	0.0	0.0	0.0	0.0	0.0	0.0	0.0	0.0	0.0	0.0	0.0	0.0
OTU 1898	0.0	0.0	0.0	0.0	32.0	0.0	0.0	0.0	0.0	0.0	0.0	0.0	0.0	0.0	0.0	0.0	0.0	0.0	0.0	0.0	0.0	0.0	0.0	0.0	0.0	0.0	0.0	0.0	0.0	0.0	0.0
OTU 1899	0.0	0.0	0.0	0.0	32.0	0.0	0.0	0.0	0.0	0.0	0.0	0.0	0.0	0.0	0.0	0.0	0.0	0.0	0.0	0.0	0.0	0.0	0.0	0.0	0.0	0.0	0.0	0.0	0.0	0.0	0.0
OTU 1900	0.0	0.0	0.0	0.0	0.0	0.0	32.0	0.0	0.0	0.0	0.0	0.0	0.0	0.0	0.0	0.0	0.0	0.0	0.0	0.0	0.0	0.0	0.0	0.0	0.0	0.0	0.0	0.0	0.0	0.0	0.0
OTU 1901	0.0	0.0	0.0	0.0	0.0	0.0	0.0	0.0	32.0	0.0	0.0	0.0	0.0	0.0	0.0	0.0	0.0	0.0	0.0	0.0	0.0	0.0	0.0	0.0	0.0	0.0	0.0	0.0	0.0	0.0	0.0
OTU 1902	0.0	0.0	0.0	0.0	0.0	0.0	0.0	0.0	0.0	32.0	0.0	0.0	0.0	0.0	0.0	0.0	0.0	0.0	0.0	0.0	0.0	0.0	0.0	0.0	0.0	0.0	0.0	0.0	0.0	0.0	0.0
OTU 1903	0.0	0.0	0.0	0.0	0.0	0.0	0.0	0.0	0.0	32.0	0.0	0.0	0.0	0.0	0.0	0.0	0.0	0.0	0.0	0.0	0.0	0.0	0.0	0.0	0.0	0.0	0.0	0.0	0.0	0.0	0.0
OTU 1904	0.0	0.0	0.0	0.0	0.0	0.0	0.0	0.0	0.0	32.0	0.0	0.0	0.0	0.0	0.0	0.0	0.0	0.0	0.0	0.0	0.0	0.0	0.0	0.0	0.0	0.0	0.0	0.0	0.0	0.0	0.0
OTU 1905	0.0	0.0	0.0	0.0	0.0	0.0	0.0	0.0	0.0	32.0	0.0	0.0	0.0	0.0	0.0	0.0	0.0	0.0	0.0	0.0	0.0	0.0	0.0	0.0	0.0	0.0	0.0	0.0	0.0	0.0	0.0
OTU 1906	0.0	0.0	0.0	0.0	0.0	0.0	0.0	0.0	0.0	0.0	32.0	0.0	0.0	0.0	0.0	0.0	0.0	0.0	0.0	0.0	0.0	0.0	0.0	0.0	0.0	0.0	0.0	0.0	0.0	0.0	0.0
OTU 1907	0.0	0.0	0.0	0.0	0.0	0.0	0.0	0.0	0.0	0.0	0.0	0.0	8.0	24.0	0.0	0.0	0.0	0.0	0.0	0.0	0.0	0.0	0.0	0.0	0.0	0.0	0.0	0.0	0.0	0.0	0.0
OTU 1908	0.0	0.0	0.0	0.0	0.0	0.0	0.0	0.0	0.0	0.0	0.0	0.0	8.0	0.0	0.0	0.0	11.0	13.0	0.0	0.0	0.0	0.0	0.0	0.0	0.0	0.0	0.0	0.0	0.0	0.0	0.0
OTU 1909	0.0	0.0	0.0	0.0	0.0	0.0	0.0	0.0	0.0	0.0	0.0	0.0	0.0	32.0	0.0	0.0	0.0	0.0	0.0	0.0	0.0	0.0	0.0	0.0	0.0	0.0	0.0	0.0	0.0	0.0	0.0
OTU 1910	0.0	0.0	0.0	0.0	0.0	0.0	0.0	0.0	0.0	0.0	0.0	0.0	0.0	0.0	0.0	32.0	0.0	0.0	0.0	0.0	0.0	0.0	0.0	0.0	0.0	0.0	0.0	0.0	0.0	0.0	0.0
OTU 1911	0.0	0.0	0.0	0.0	0.0	0.0	0.0	0.0	0.0	0.0	0.0	0.0	0.0	0.0	0.0	32.0	0.0	0.0	0.0	0.0	0.0	0.0	0.0	0.0	0.0	0.0	0.0	0.0	0.0	0.0	0.0
OTU 1912	0.0	0.0	0.0	0.0	0.0	0.0	0.0	0.0	0.0	0.0	0.0	0.0	0.0	0.0	0.0	0.0	0.0	0.0	32.0	0.0	0.0	0.0	0.0	0.0	0.0	0.0	0.0	0.0	0.0	0.0	0.0
OTU 1913	0.0	0.0	0.0	0.0	0.0	0.0	0.0	0.0	0.0	0.0	0.0	0.0	0.0	0.0	0.0	0.0	0.0	0.0	32.0	0.0	0.0	0.0	0.0	0.0	0.0	0.0	0.0	0.0	0.0	0.0	0.0
OTU 1914	0.0	0.0	0.0	0.0	0.0	0.0	0.0	0.0	0.0	0.0	0.0	0.0	0.0	0.0	0.0	0.0	0.0	0.0	32.0	0.0	0.0	0.0	0.0	0.0	0.0	0.0	0.0	0.0	0.0	0.0	0.0
OTU 1915	0.0	0.0	0.0	0.0	0.0	0.0	0.0	0.0	0.0	0.0	0.0	0.0	0.0	0.0	0.0	0.0	0.0	0.0	0.0	32.0	0.0	0.0	0.0	0.0	0.0	0.0	0.0	0.0	0.0	0.0	0.0
OTU 1916	0.0	0.0	0.0	0.0	0.0	0.0	0.0	0.0	0.0	0.0	0.0	0.0	0.0	0.0	0.0	0.0	0.0	0.0	0.0	32.0	0.0	0.0	0.0	0.0	0.0	0.0	0.0	0.0	0.0	0.0	0.0
OTU 1917	0.0	0.0	0.0	0.0	0.0	0.0	0.0	0.0	0.0	0.0	0.0	0.0	0.0	0.0	0.0	0.0	0.0	0.0	0.0	32.0	0.0	0.0	0.0	0.0	0.0	0.0	0.0	0.0	0.0	0.0	0.0
OTU 1918	0.0	0.0	0.0	0.0	0.0	0.0	0.0	0.0	0.0	0.0	0.0	0.0	0.0	0.0	0.0	0.0	0.0	0.0	0.0	32.0	0.0	0.0	0.0	0.0	0.0	0.0	0.0	0.0	0.0	0.0	0.0
OTU 1919	0.0	0.0	0.0	0.0	0.0	0.0	0.0	0.0	0.0	0.0	0.0	0.0	0.0	0.0	0.0	0.0	0.0	0.0	0.0	0.0	0.0	0.0	32.0	0.0	0.0	0.0	0.0	0.0	0.0	0.0	0.0
OTU 1920	0.0	0.0	0.0	0.0	0.0	0.0	0.0	0.0	0.0	0.0	0.0	0.0	0.0	0.0	0.0	0.0	0.0	0.0	0.0	0.0	0.0	0.0	32.0	0.0	0.0	0.0	0.0	0.0	0.0	0.0	0.0
OTU 1921	0.0	0.0	0.0	0.0	0.0	0.0	0.0	0.0	0.0	0.0	0.0	0.0	0.0	0.0	0.0	0.0	0.0	0.0	0.0	0.0	0.0	0.0	0.0	32.0	0.0	0.0	0.0	0.0	0.0	0.0	0.0
OTU 1922	0.0	0.0	0.0	0.0	0.0	0.0	0.0	0.0	0.0	0.0	0.0	0.0	0.0	0.0	0.0	0.0	0.0	0.0	0.0	0.0	0.0	0.0	0.0	0.0	32.0	0.0	0.0	0.0	0.0	0.0	0.0
OTU 1923	0.0	0.0	0.0	0.0	0.0	0.0	0.0	0.0	0.0	0.0	0.0	0.0	0.0	0.0	0.0	0.0	0.0	0.0	0.0	0.0	0.0	0.0	0.0	0.0	0.0	32.0	0.0	0.0	0.0	0.0	0.0
OTU 1924	0.0	0.0	0.0	0.0	0.0	0.0	0.0	0.0	0.0	0.0	0.0	0.0	0.0	0.0	0.0	0.0	0.0	0.0	0.0	0.0	0.0	0.0	0.0	0.0	0.0	0.0	0.0	0.0	32.0	0.0	0.0
OTU 1925	0.0	0.0	0.0	0.0	0.0	0.0	0.0	0.0	0.0	0.0	0.0	0.0	0.0	0.0	0.0	0.0	0.0	0.0	0.0	0.0	0.0	0.0	0.0	0.0	0.0	0.0	0.0	0.0	0.0	32.0	0.0
OTU 1926	0.0	0.0	0.0	0.0	0.0	0.0	0.0	0.0	0.0	0.0	0.0	0.0	0.0	0.0	0.0	0.0	0.0	0.0	0.0	0.0	0.0	0.0	0.0	0.0	0.0	0.0	0.0	0.0	0.0	32.0	0.0
OTU 1927	0.0	0.0	0.0	0.0	0.0	0.0	0.0	0.0	0.0	0.0	0.0	0.0	0.0	0.0	0.0	0.0	0.0	0.0	0.0	0.0	0.0	0.0	0.0	0.0	0.0	0.0	0.0	0.0	0.0	0.0	32.0
OTU 1928	0.0	0.0	0.0	0.0	0.0	0.0	0.0	0.0	0.0	0.0	0.0	0.0	0.0	0.0	0.0	0.0	0.0	0.0	0.0	0.0	0.0	0.0	0.0	0.0	0.0	0.0	0.0	0.0	0.0	0.0	32.0
OTU 1929	31.0	0.0	0.0	0.0	0.0	0.0	0.0	0.0	0.0	0.0	0.0	0.0	0.0	0.0	0.0	0.0	0.0	0.0	0.0	0.0	0.0	0.0	0.0	0.0	0.0	0.0	0.0	0.0	0.0	0.0	0.0
OTU 1930	0.0	31.0	0.0	0.0	0.0	0.0	0.0	0.0	0.0	0.0	0.0	0.0	0.0	0.0	0.0	0.0	0.0	0.0	0.0	0.0	0.0	0.0	0.0	0.0	0.0	0.0	0.0	0.0	0.0	0.0	0.0
OTU 1931	0.0	0.0	0.0	31.0	0.0	0.0	0.0	0.0	0.0	0.0	0.0	0.0	0.0	0.0	0.0	0.0	0.0	0.0	0.0	0.0	0.0	0.0	0.0	0.0	0.0	0.0	0.0	0.0	0.0	0.0	0.0
OTU 1932	0.0	0.0	0.0	31.0	0.0	0.0	0.0	0.0	0.0	0.0	0.0	0.0	0.0	0.0	0.0	0.0	0.0	0.0	0.0	0.0	0.0	0.0	0.0	0.0	0.0	0.0	0.0	0.0	0.0	0.0	0.0
OTU 1933	0.0	0.0	0.0	31.0	0.0	0.0	0.0	0.0	0.0	0.0	0.0	0.0	0.0	0.0	0.0	0.0	0.0	0.0	0.0	0.0	0.0	0.0	0.0	0.0	0.0	0.0	0.0	0.0	0.0	0.0	0.0
OTU 1934	0.0	0.0	0.0	0.0	18.0	0.0	0.0	0.0	0.0	0.0	0.0	0.0	0.0	0.0	0.0	0.0	0.0	0.0	0.0	0.0	0.0	0.0	0.0	0.0	0.0	0.0	13.0	0.0	0.0	0.0	0.0
OTU 1935	0.0	0.0	0.0	0.0	0.0	0.0	31.0	0.0	0.0	0.0	0.0	0.0	0.0	0.0	0.0	0.0	0.0	0.0	0.0	0.0	0.0	0.0	0.0	0.0	0.0	0.0	0.0	0.0	0.0	0.0	0.0
OTU 1936	0.0	0.0	0.0	0.0	0.0	0.0	31.0	0.0	0.0	0.0	0.0	0.0	0.0	0.0	0.0	0.0	0.0	0.0	0.0	0.0	0.0	0.0	0.0	0.0	0.0	0.0	0.0	0.0	0.0	0.0	0.0
OTU 1937	0.0	0.0	0.0	0.0	0.0	0.0	31.0	0.0	0.0	0.0	0.0	0.0	0.0	0.0	0.0	0.0	0.0	0.0	0.0	0.0	0.0	0.0	0.0	0.0	0.0	0.0	0.0	0.0	0.0	0.0	0.0
OTU 1938	0.0	0.0	0.0	0.0	0.0	0.0	13.0	0.0	0.0	0.0	0.0	0.0	0.0	0.0	0.0	0.0	0.0	0.0	0.0	0.0	18.0	0.0	0.0	0.0	0.0	0.0	0.0	0.0	0.0	0.0	0.0
OTU 1939	0.0	0.0	0.0	0.0	0.0	0.0	0.0	31.0	0.0	0.0	0.0	0.0	0.0	0.0	0.0	0.0	0.0	0.0	0.0	0.0	0.0	0.0	0.0	0.0	0.0	0.0	0.0	0.0	0.0	0.0	0.0
OTU 1940	0.0	0.0	0.0	0.0	0.0	0.0	0.0	0.0	0.0	0.0	31.0	0.0	0.0	0.0	0.0	0.0	0.0	0.0	0.0	0.0	0.0	0.0	0.0	0.0	0.0	0.0	0.0	0.0	0.0	0.0	0.0
OTU 1941	0.0	0.0	0.0	0.0	0.0	0.0	0.0	0.0	0.0	0.0	0.0	31.0	0.0	0.0	0.0	0.0	0.0	0.0	0.0	0.0	0.0	0.0	0.0	0.0	0.0	0.0	0.0	0.0	0.0	0.0	0.0
OTU 1942	0.0	0.0	0.0	0.0	0.0	0.0	0.0	0.0	0.0	0.0	0.0	31.0	0.0	0.0	0.0	0.0	0.0	0.0	0.0	0.0	0.0	0.0	0.0	0.0	0.0	0.0	0.0	0.0	0.0	0.0	0.0
OTU 1943	0.0	0.0	0.0	0.0	0.0	0.0	0.0	0.0	0.0	0.0	0.0	0.0	0.0	0.0	0.0	0.0	31.0	0.0	0.0	0.0	0.0	0.0	0.0	0.0	0.0	0.0	0.0	0.0	0.0	0.0	0.0
OTU 1944	0.0	0.0	0.0	0.0	0.0	0.0	0.0	0.0	0.0	0.0	0.0	0.0	0.0	0.0	0.0	0.0	0.0	0.0	0.0	0.0	0.0	0.0	31.0	0.0	0.0	0.0	0.0	0.0	0.0	0.0	0.0
OTU 1945	0.0	0.0	0.0	0.0	0.0	0.0	0.0	0.0	0.0	0.0	0.0	0.0	0.0	0.0	0.0	0.0	0.0	0.0	0.0	0.0	0.0	0.0	0.0	0.0	0.0	31.0	0.0	0.0	0.0	0.0	0.0
OTU 1946	0.0	0.0	0.0	0.0	0.0	0.0	0.0	0.0	0.0	0.0	0.0	0.0	0.0	0.0	0.0	0.0	0.0	0.0	0.0	0.0	0.0	0.0	0.0	0.0	0.0	19.0	0.0	12.0	0.0	0.0	0.0
OTU 1947	0.0	0.0	0.0	0.0	0.0	0.0	0.0	0.0	0.0	0.0	0.0	0.0	0.0	0.0	0.0	0.0	0.0	0.0	0.0	0.0	0.0	0.0	0.0	0.0	0.0	15.0	0.0	16.0	0.0	0.0	0.0
OTU 1948	0.0	0.0	0.0	0.0	0.0	0.0	0.0	0.0	0.0	0.0	0.0	0.0	0.0	0.0	0.0	0.0	0.0	0.0	0.0	0.0	0.0	0.0	0.0	0.0	0.0	0.0	0.0	0.0	0.0	31.0	0.0
OTU 1949	0.0	0.0	0.0	0.0	0.0	0.0	0.0	0.0	0.0	0.0	0.0	0.0	0.0	0.0	0.0	0.0	0.0	0.0	0.0	0.0	0.0	0.0	0.0	0.0	0.0	0.0	0.0	0.0	0.0	31.0	0.0
OTU 1950	30.0	0.0	0.0	0.0	0.0	0.0	0.0	0.0	0.0	0.0	0.0	0.0	0.0	0.0	0.0	0.0	0.0	0.0	0.0	0.0	0.0	0.0	0.0	0.0	0.0	0.0	0.0	0.0	0.0	0.0	0.0
OTU 1951	0.0	30.0	0.0	0.0	0.0	0.0	0.0	0.0	0.0	0.0	0.0	0.0	0.0	0.0	0.0	0.0	0.0	0.0	0.0	0.0	0.0	0.0	0.0	0.0	0.0	0.0	0.0	0.0	0.0	0.0	0.0
OTU 1952	0.0	0.0	30.0	0.0	0.0	0.0	0.0	0.0	0.0	0.0	0.0	0.0	0.0	0.0	0.0	0.0	0.0	0.0	0.0	0.0	0.0	0.0	0.0	0.0	0.0	0.0	0.0	0.0	0.0	0.0	0.0
OTU 1953	0.0	0.0	0.0	30.0	0.0	0.0	0.0	0.0	0.0	0.0	0.0	0.0	0.0	0.0	0.0	0.0	0.0	0.0	0.0	0.0	0.0	0.0	0.0	0.0	0.0	0.0	0.0	0.0	0.0	0.0	0.0
OTU 1954	0.0	0.0	0.0	30.0	0.0	0.0	0.0	0.0	0.0	0.0	0.0	0.0	0.0	0.0	0.0	0.0	0.0	0.0	0.0	0.0	0.0	0.0	0.0	0.0	0.0	0.0	0.0	0.0	0.0	0.0	0.0
OTU 1955	0.0	0.0	0.0	30.0	0.0	0.0	0.0	0.0	0.0	0.0	0.0	0.0	0.0	0.0	0.0	0.0	0.0	0.0	0.0	0.0	0.0	0.0	0.0	0.0	0.0	0.0	0.0	0.0	0.0	0.0	0.0
OTU 1956	0.0	0.0	0.0	30.0	0.0	0.0	0.0	0.0	0.0	0.0	0.0	0.0	0.0	0.0	0.0	0.0	0.0	0.0	0.0	0.0	0.0	0.0	0.0	0.0	0.0	0.0	0.0	0.0	0.0	0.0	0.0
OTU 1957	0.0	0.0	0.0	0.0	11.0	0.0	0.0	0.0	0.0	0.0	0.0	0.0	0.0	0.0	0.0	0.0	7.0	12.0	0.0	0.0	0.0	0.0	0.0	0.0	0.0	0.0	0.0	0.0	0.0	0.0	0.0
OTU 1958	0.0	0.0	0.0	0.0	0.0	30.0	0.0	0.0	0.0	0.0	0.0	0.0	0.0	0.0	0.0	0.0	0.0	0.0	0.0	0.0	0.0	0.0	0.0	0.0	0.0	0.0	0.0	0.0	0.0	0.0	0.0
OTU 1959	0.0	0.0	0.0	0.0	0.0	0.0	0.0	30.0	0.0	0.0	0.0	0.0	0.0	0.0	0.0	0.0	0.0	0.0	0.0	0.0	0.0	0.0	0.0	0.0	0.0	0.0	0.0	0.0	0.0	0.0	0.0
OTU 1960	0.0	0.0	0.0	0.0	0.0	0.0	0.0	0.0	30.0	0.0	0.0	0.0	0.0	0.0	0.0	0.0	0.0	0.0	0.0	0.0	0.0	0.0	0.0	0.0	0.0	0.0	0.0	0.0	0.0	0.0	0.0
OTU 1961	0.0	0.0	0.0	0.0	0.0	0.0	0.0	0.0	30.0	0.0	0.0	0.0	0.0	0.0	0.0	0.0	0.0	0.0	0.0	0.0	0.0	0.0	0.0	0.0	0.0	0.0	0.0	0.0	0.0	0.0	0.0
OTU 1962	0.0	0.0	0.0	0.0	0.0	0.0	0.0	0.0	0.0	30.0	0.0	0.0	0.0	0.0	0.0	0.0	0.0	0.0	0.0	0.0	0.0	0.0	0.0	0.0	0.0	0.0	0.0	0.0	0.0	0.0	0.0
OTU 1963	0.0	0.0	0.0	0.0	0.0	0.0	0.0	0.0	0.0	0.0	0.0	30.0	0.0	0.0	0.0	0.0	0.0	0.0	0.0	0.0	0.0	0.0	0.0	0.0	0.0	0.0	0.0	0.0	0.0	0.0	0.0
OTU 1964	0.0	0.0	0.0	0.0	0.0	0.0	0.0	0.0	0.0	0.0	0.0	8.0	0.0	0.0	0.0	0.0	0.0	0.0	0.0	0.0	0.0	0.0	0.0	0.0	0.0	0.0	0.0	0.0	0.0	0.0	22.0
OTU 1965	0.0	0.0	0.0	0.0	0.0	0.0	0.0	0.0	0.0	0.0	0.0	0.0	0.0	30.0	0.0	0.0	0.0	0.0	0.0	0.0	0.0	0.0	0.0	0.0	0.0	0.0	0.0	0.0	0.0	0.0	0.0
OTU 1966	0.0	0.0	0.0	0.0	0.0	0.0	0.0	0.0	0.0	0.0	0.0	0.0	0.0	30.0	0.0	0.0	0.0	0.0	0.0	0.0	0.0	0.0	0.0	0.0	0.0	0.0	0.0	0.0	0.0	0.0	0.0
OTU 1967	0.0	0.0	0.0	0.0	0.0	0.0	0.0	0.0	0.0	0.0	0.0	0.0	0.0	0.0	8.0	0.0	0.0	0.0	0.0	0.0	0.0	0.0	0.0	0.0	0.0	0.0	0.0	22.0	0.0	0.0	0.0
OTU 1968	0.0	0.0	0.0	0.0	0.0	0.0	0.0	0.0	0.0	0.0	0.0	0.0	0.0	0.0	0.0	30.0	0.0	0.0	0.0	0.0	0.0	0.0	0.0	0.0	0.0	0.0	0.0	0.0	0.0	0.0	0.0
OTU 1969	0.0	0.0	0.0	0.0	0.0	0.0	0.0	0.0	0.0	0.0	0.0	0.0	0.0	0.0	0.0	30.0	0.0	0.0	0.0	0.0	0.0	0.0	0.0	0.0	0.0	0.0	0.0	0.0	0.0	0.0	0.0
OTU 1970	0.0	0.0	0.0	0.0	0.0	0.0	0.0	0.0	0.0	0.0	0.0	0.0	0.0	0.0	0.0	0.0	0.0	30.0	0.0	0.0	0.0	0.0	0.0	0.0	0.0	0.0	0.0	0.0	0.0	0.0	0.0
OTU 1971	0.0	0.0	0.0	0.0	0.0	0.0	0.0	0.0	0.0	0.0	0.0	0.0	0.0	0.0	0.0	0.0	0.0	30.0	0.0	0.0	0.0	0.0	0.0	0.0	0.0	0.0	0.0	0.0	0.0	0.0	0.0
OTU 1972	0.0	0.0	0.0	0.0	0.0	0.0	0.0	0.0	0.0	0.0	0.0	0.0	0.0	0.0	0.0	0.0	0.0	0.0	0.0	0.0	0.0	30.0	0.0	0.0	0.0	0.0	0.0	0.0	0.0	0.0	0.0
OTU 1973	0.0	0.0	0.0	0.0	0.0	0.0	0.0	0.0	0.0	0.0	0.0	0.0	0.0	0.0	0.0	0.0	0.0	0.0	0.0	0.0	0.0	30.0	0.0	0.0	0.0	0.0	0.0	0.0	0.0	0.0	0.0
OTU 1974	0.0	0.0	0.0	0.0	0.0	0.0	0.0	0.0	0.0	0.0	0.0	0.0	0.0	0.0	0.0	0.0	0.0	0.0	0.0	0.0	0.0	0.0	30.0	0.0	0.0	0.0	0.0	0.0	0.0	0.0	0.0
OTU 1975	0.0	0.0	0.0	0.0	0.0	0.0	0.0	0.0	0.0	0.0	0.0	0.0	0.0	0.0	0.0	0.0	0.0	0.0	0.0	0.0	0.0	0.0	30.0	0.0	0.0	0.0	0.0	0.0	0.0	0.0	0.0
OTU 1976	0.0	0.0	0.0	0.0	0.0	0.0	0.0	0.0	0.0	0.0	0.0	0.0	0.0	0.0	0.0	0.0	0.0	0.0	0.0	0.0	0.0	0.0	0.0	30.0	0.0	0.0	0.0	0.0	0.0	0.0	0.0
OTU 1977	0.0	0.0	0.0	0.0	0.0	0.0	0.0	0.0	0.0	0.0	0.0	0.0	0.0	0.0	0.0	0.0	0.0	0.0	0.0	0.0	0.0	0.0	0.0	0.0	30.0	0.0	0.0	0.0	0.0	0.0	0.0
OTU 1978	0.0	0.0	0.0	0.0	0.0	0.0	0.0	0.0	0.0	0.0	0.0	0.0	0.0	0.0	0.0	0.0	0.0	0.0	0.0	0.0	0.0	0.0	0.0	0.0	0.0	0.0	30.0	0.0	0.0	0.0	0.0
OTU 1979	0.0	0.0	0.0	0.0	0.0	0.0	0.0	0.0	0.0	0.0	0.0	0.0	0.0	0.0	0.0	0.0	0.0	0.0	0.0	0.0	0.0	0.0	0.0	0.0	0.0	0.0	0.0	0.0	0.0	30.0	0.0
OTU 1980	0.0	0.0	0.0	0.0	0.0	0.0	0.0	0.0	0.0	0.0	0.0	0.0	0.0	0.0	0.0	0.0	0.0	0.0	0.0	0.0	0.0	0.0	0.0	0.0	0.0	0.0	0.0	0.0	0.0	30.0	0.0
OTU 1981	14.0	0.0	0.0	0.0	0.0	0.0	0.0	0.0	0.0	0.0	0.0	0.0	0.0	0.0	0.0	0.0	0.0	0.0	0.0	0.0	0.0	0.0	0.0	0.0	0.0	0.0	0.0	0.0	0.0	15.0	0.0
OTU 1982	13.0	0.0	0.0	0.0	0.0	0.0	0.0	0.0	0.0	0.0	0.0	0.0	0.0	0.0	0.0	0.0	0.0	0.0	0.0	0.0	0.0	0.0	0.0	0.0	0.0	0.0	16.0	0.0	0.0	0.0	0.0
OTU 1983	0.0	0.0	29.0	0.0	0.0	0.0	0.0	0.0	0.0	0.0	0.0	0.0	0.0	0.0	0.0	0.0	0.0	0.0	0.0	0.0	0.0	0.0	0.0	0.0	0.0	0.0	0.0	0.0	0.0	0.0	0.0
OTU 1984	0.0	0.0	29.0	0.0	0.0	0.0	0.0	0.0	0.0	0.0	0.0	0.0	0.0	0.0	0.0	0.0	0.0	0.0	0.0	0.0	0.0	0.0	0.0	0.0	0.0	0.0	0.0	0.0	0.0	0.0	0.0
OTU 1985	0.0	0.0	0.0	0.0	29.0	0.0	0.0	0.0	0.0	0.0	0.0	0.0	0.0	0.0	0.0	0.0	0.0	0.0	0.0	0.0	0.0	0.0	0.0	0.0	0.0	0.0	0.0	0.0	0.0	0.0	0.0
OTU 1986	0.0	0.0	0.0	0.0	29.0	0.0	0.0	0.0	0.0	0.0	0.0	0.0	0.0	0.0	0.0	0.0	0.0	0.0	0.0	0.0	0.0	0.0	0.0	0.0	0.0	0.0	0.0	0.0	0.0	0.0	0.0
OTU 1987	0.0	0.0	0.0	0.0	0.0	0.0	0.0	29.0	0.0	0.0	0.0	0.0	0.0	0.0	0.0	0.0	0.0	0.0	0.0	0.0	0.0	0.0	0.0	0.0	0.0	0.0	0.0	0.0	0.0	0.0	0.0
OTU 1988	0.0	0.0	0.0	0.0	0.0	0.0	0.0	29.0	0.0	0.0	0.0	0.0	0.0	0.0	0.0	0.0	0.0	0.0	0.0	0.0	0.0	0.0	0.0	0.0	0.0	0.0	0.0	0.0	0.0	0.0	0.0
OTU 1989	0.0	0.0	0.0	0.0	0.0	0.0	0.0	29.0	0.0	0.0	0.0	0.0	0.0	0.0	0.0	0.0	0.0	0.0	0.0	0.0	0.0	0.0	0.0	0.0	0.0	0.0	0.0	0.0	0.0	0.0	0.0
OTU 1990	0.0	0.0	0.0	0.0	0.0	0.0	0.0	0.0	29.0	0.0	0.0	0.0	0.0	0.0	0.0	0.0	0.0	0.0	0.0	0.0	0.0	0.0	0.0	0.0	0.0	0.0	0.0	0.0	0.0	0.0	0.0
OTU 1991	0.0	0.0	0.0	0.0	0.0	0.0	0.0	0.0	0.0	29.0	0.0	0.0	0.0	0.0	0.0	0.0	0.0	0.0	0.0	0.0	0.0	0.0	0.0	0.0	0.0	0.0	0.0	0.0	0.0	0.0	0.0
OTU 1992	0.0	0.0	0.0	0.0	0.0	0.0	0.0	0.0	0.0	0.0	0.0	29.0	0.0	0.0	0.0	0.0	0.0	0.0	0.0	0.0	0.0	0.0	0.0	0.0	0.0	0.0	0.0	0.0	0.0	0.0	0.0
OTU 1993	0.0	0.0	0.0	0.0	0.0	0.0	0.0	0.0	0.0	0.0	0.0	29.0	0.0	0.0	0.0	0.0	0.0	0.0	0.0	0.0	0.0	0.0	0.0	0.0	0.0	0.0	0.0	0.0	0.0	0.0	0.0
OTU 1994	0.0	0.0	0.0	0.0	0.0	0.0	0.0	0.0	0.0	0.0	0.0	29.0	0.0	0.0	0.0	0.0	0.0	0.0	0.0	0.0	0.0	0.0	0.0	0.0	0.0	0.0	0.0	0.0	0.0	0.0	0.0
OTU 1995	0.0	0.0	0.0	0.0	0.0	0.0	0.0	0.0	0.0	0.0	0.0	0.0	0.0	0.0	0.0	29.0	0.0	0.0	0.0	0.0	0.0	0.0	0.0	0.0	0.0	0.0	0.0	0.0	0.0	0.0	0.0
OTU 1996	0.0	0.0	0.0	0.0	0.0	0.0	0.0	0.0	0.0	0.0	0.0	0.0	0.0	0.0	0.0	29.0	0.0	0.0	0.0	0.0	0.0	0.0	0.0	0.0	0.0	0.0	0.0	0.0	0.0	0.0	0.0
OTU 1997	0.0	0.0	0.0	0.0	0.0	0.0	0.0	0.0	0.0	0.0	0.0	0.0	0.0	0.0	0.0	29.0	0.0	0.0	0.0	0.0	0.0	0.0	0.0	0.0	0.0	0.0	0.0	0.0	0.0	0.0	0.0
OTU 1998	0.0	0.0	0.0	0.0	0.0	0.0	0.0	0.0	0.0	0.0	0.0	0.0	0.0	0.0	0.0	29.0	0.0	0.0	0.0	0.0	0.0	0.0	0.0	0.0	0.0	0.0	0.0	0.0	0.0	0.0	0.0
[truncated: 3,972 more rows]
